# Supplementary material for: iDNA-Prot|dis: Identifying DNA-Binding Proteins by Incorporating Amino Acid Distance-Pairs and Reduced Alphabet Profile into the General Pseudo Amino Acid Composition
Source: PubMed Central journal article supplement (PMC4153653; doi:10.1371/journal.pone.0106691), 2014-09-03
Supplement: pone.0106691.s001.pdf [file pone.0106691.s001.pdf]

The benchmark dataset  $\mathcal{S}$  contains 1,075 protein sequences, which are classified into subset  $\mathcal{S}^+$  with 525 DNA-binding proteins (positive samples) and subset  $\mathcal{S}^-$  with 550 non-DNA-binding proteins (negative samples).

---

### (1) 525 DNA-binding proteins

>1AKHA

KKEKSPKGGKSSISPQARAFLEEVFRRKQSLNSKEKEEVAKKCGITPLQVRVWFINKRMRSK

>1AOII

ATCAATATCCACCTGCAGATTCTACCAAAAGTGTATTTGGAACTGCTCCATCAAAAGGCATGTT  
CAGCTGAATTCAGCTGAACATGCCTTTTGATGGAGCAGTTTCCAAATACACTTTTGGTAGAATCT  
GCAGGTGGATATTGAT

>1B6WA

MELPIAPIGRIIKDAGAERVSDDARITLAKILEEMGRDIASEAIKRLARHAGRKTIKAEDIELAVR  
RFKK

>1C1KA

MIKLRRMPAGGERYIDGKSVYKLYLMIKQHMNGKYDVIKYNWCMRVSDAAYQKRRDKYFFQKLSEK  
YKLKELALIFISNLVANQDAWIGDISDADALVFYREYIGRLKQIKFKFEEDIRNIYYFSKKVEVS  
AFKEIFEYNPKVQSSYIFKLLQSNII SFETFILLDSFLNIIDKHDEQTDNLVWNNYSIKLKAYRK  
ILNIDSQKAKNVFIETVKSKY

>1C6VX

QQSKNSKFKNFRVYYREGDQLWKGPGEELLWKGEAVLLKVGTDIKVPPRRKAKIIKDYGGGKEV  
DSSSHMEDTGEAREVA

>1C6VD

IHGQVNSDLGTWQMDCTHLEGGKIVIVAVHVASGFIEAEVIPPQETGRQTALFLLKLAGRWPITHLH  
TDNGANFASQEVKMWAWWAGIEHTFGVPYNPQSQGVVEAMNHHLKNQIDRIREQANSVETIVLMA  
VHCMNHKRRGGIGDMTPAERLINMITTEQEIQFQ

>1CI4B

MTTSQKHRDFVAEPMGEKPVGSLAGIGEVLGKKLEERGFDKAYVVLGQFLVLKKDEDLFREWLKD  
TCGANAKQSRDCFGCLREWCD AFL

>1D4UA

MEFDYVICEECGKEFMDSYLMDFDLPTCDDCRDADDKHKLITKTEAKQEYLLKDCDLEKREPPL  
KFIVKKNPHHSQWGMKLYLKLQIVKRSLEVWGSQEAL EEAKEVRQ

>1D8BA

ELNNLRMTYERLRELSLNLGNRMVPPVGNFMPDSILKKMAAILPMNDSAFATLGTVEDKYRRRFK  
YFKATIADLSKKRSSE

>1DMLG

MTDSPGGVAPASPVEDASDASLGQPEEGAPCQVVVLQGAELNGILQAFAPLRTSLLDSLLVMGDRG  
ILIHNTIFGEQVFLPLEHSQFSRYRWRGPTAAFLSLVDQKRSLLSVFRANQYPDLRRVELAITGQ  
APFRTLQRIWTTTSDGEAVELASETLMKRELTSFVVLVPQGTPDVQLRLTRPQLTKVLNATGAD  
SATPTTFELGVNGKFSVFTTSTCVTF AAREEGVSSSTSTQVQILSNALTKAGQAAANAKTVYGEN  
THRTFSVVDDCSMRAVLRRLQVGGGTLKFFLTPVPSLCVTATGPNVSAVFLLPQK

>1EE8B

PELPEVETTRRRRLRPLVLGQTLRQVVHRDPARYRNTALAEGRRILEVDRRGKFLLEGGVELV

AHLGMTGGFRLEPTPHTRAALVLEGRPLYFHDPRRFGRLFGVRRGDYREIPLLLRLGPEPLSEAF  
 AFPGGFRGLKESARPLKALLLDQRLAAGVGNIIYADEALFRARLSPFRPARSLTEEEARRLYRALR  
 EVLAEAVELGGSTLSDQSYRQPDGLPGGFQTRHAVYGREGLPCPACGRPVERRRVVAGRTHFCPT  
 CQGE GP

>1E1JA

MRQQLEMQKKQIMMQILTPEARSRLANLRLTRPDFVEQIELQLIQLAQMGVRVRSKITDEQLKELL  
 KRVAGKKREIKISRK

>1F1EA

MAVELPKAAIERIFRQIGIGERRLSQDAKDTIYDFVPTMAEYVANAAKSVLDASGKKTLMEEHLKA  
 LADVLMVEGVEDYDGE LFG RATVRRILKRAGIERASSDAVDLYNKLICRATEELGEKAAEYADED  
 GRKTVQGEDVEKAITYSMPKGGEL

>1F2RI

MELSRGASAPDPPDVRPLKPCLLRRNHSRDQHGVAASSLEELRSKACELLAIDKSLTPITLVLAE  
 DGTIVDDDDYFLCLPSNTKFVALACNEKWTYNDS

>1F6VA

GSRIAKRTAINKTKKADVKAIAADAWQINGEKELELLQQIAQKPGALRILNHSRLAAMTAHGKGE  
 RVNEDYLRQAFRELDLDVDISTLLRN

>1G5HA

WLSGYAGPADGTQQPDAPEHAVAREALVDLCRRRHFLSGTPQQQLSTAALLSGCHARFGPLGVELR  
 KNLASQWWSSMVVFREQVFAVDSLHQEPGSSQPRDSAFRLVSPESIREILQDREPSKEQLVAFLE  
 NLLKTSGLRATLLHGALEHYVNCCLDLVNRKLPFGLAQIGVCFHPVSNQTPSSVTRVGEKTEA  
 SLVWFTPTRTSSQWLDFWLRHRLWWRKFAMSPSNFSSADCQDELGRKGSKLYYSFPWGKEPIET  
 LWNLGDQELLHTYPGNVSTIQGRDGRKNVPCVLSVSGDVLGTLAYLYDSFQLAENSFARKKSL  
 QRKVLKLPCLAPIKVALDVGKGPVELRQVCQGLLNELLENGISVWPGYSETVHSSLEQLHISKY  
 DEMSVLFSVLVTETTLENGLIQLRSRDTMKEMMHISKLRDFLVKYLASASNVAALDHHHHHH

>1GDTB

MRLFGYARVSTSQQSLDIQVRALKDAGVKANRIFTDKASGSSDRKGLDLLRMKVEEGDVILVKK  
 LDRLGRDTADMIQLIKEFDAQGV SIRFIDDGISTDGE MGKVVITLSAVAQAERQRI LERTNEGR  
 QEAMAKGVVFGRKRKIDRDAVLNMWQQGLGASHISKTMNIARSTVYKVINESN

>1HCRA

GRPRAINKHEQEQISRLLEKGHPRQQLAIFGIGVSTLYRYFPASSIKKRMN

>1HKQA

MVDNKVTQSNKLISSHTLTLNEKRLVLCASLIDSRKPLPKDGYLTIRADTFAEVFGIDVKHAY  
 AALDDAATKLFNRDIRRYVKGKVVVERMRWVFHVKYREGQGCVELGFSPTIIPHLTMLHKEFTSYQ  
 LK

>1HLVA

MGPKRRQLTFREKSRIIQEVEENPDLRKGEIARRFNIPPSTLSTILKNKRAILASERKYGVASTC  
 RKTNKLSPYDKLEGLLIAWFQQIRAAGLPVKGIILKEKALRIAEEELGMDDFTASNGWLDLFRRRR  
 S

>1HQ3H

MSGRGKGGKGLGKGGAKRHRKVLDRDNIQGITKPAIRRLARRGGVKRISGLIYEETRGVLKVFLN  
 VIRDAVITYTEHAKRKTVTAMDVVYALKRQGRTLYGFGG

>1I11A

GSPHIKRPMAFMVWAKDERRKILQAFPMHNSNISKILGSRWKAMTNLEKQPYEEQARLSKQH

LEKYPDYKYKPRPKRT

>1IGNB

GALPSHNKASFTDEEDEFILDVVRKNPTRRTHHTLYDEISHYVPNHTGNSIRHRFRVYLSKRLEY  
 VYEVDFKFGKLVRRDDGNLIKTKVLPPSIKRKFSADEDYTLAIAVKKQFYRDLFQIDPDTGRSLIT  
 DEDTPTAIARRNMTMDPNHVPGSEPNFAAYRTQSRRGPIAREFFKHFAEEHAAHTENAWRDRFRK  
 FLLAYGIDDYISYYEAEKAQNREPEPMKNLTNRPKRPGVPTPGNYNSAAKR

>1IN4A

MSEFLTPERTVYDSGVQFLRPKSLDEFIQENVKKKLSLAEAAKMRGEVLDHVLLAGPPGLGKT  
 TLAHI IASELQTNIHVTSGPVLVKQGDMAAILTSLERGDVLFIDEIHRLNKAVEELLYSAIEDFQ  
 IDIMIGKGPSAKSIRIDIQPFITLVGATTRSGLLSSPLRSRFGIILELDFYTVKELKEIKRAASL  
 MDVEIEDAAAEMIAKRSRGTPRIAIRLTKRVRDMLTVVKADRINTDIVLKTMEVLNIDDEGLDEF  
 DRKILKTIIEIYRGGPVGLNALAASLGVEADTLSEVYEPYLLQAGFLARTPRGRIVTEKAYKHLK  
 YEVPENRLF

>1IRZA

TAQKKPRVLWTHELHNKFLAAVDHLGVERAVPKKILDLMNVDKLTRENVASHLQKFRVALKKVS

>1IUFA

GIHMGKIKRAITEHEKRALRHYFFQLQNRSGQQDLIEWFREKFGKDISQPSVSQILSSKYSYLD  
 NTVEKPWDVKRNRPPKYPLLEAALFEWQVQQGDDATLSGETIKRAAAILWHKIPEYQDQVVPNFS  
 NGWLEGFRKRHILH

>1IV6A

MTPEKHRARKRQAWLWEEDKNLRSQVRYGEGNWSKILLHYKFNNRTSVMLKDRWRMTKCLKLIS  
 SDSED

>1IXCB

MEFRQLKYFIAVAEAGNMAAAAKRLHVSQPPITRQMQALEADLGVLLERSHRGIELTAAGHAF  
 EDARRILELAGRSGDRSRAAARGDVGELSVAIFYGTPIYRSLPLLLRAFLTSTPTATVSLTHMTKD  
 EQVEGLLAGTIHVGFSRFFPRHPGIEIVNIAQEDLYLAVHRSQSGKFGKTCKLADLRAVELTLFP  
 RGGRPSFADEVIGLFGKHAGIEPRIARVVEDATAALALTMAGAASSIVPASVAAIRWPDIAFARIV  
 GTRVKVPISCFRKEKQPPILARFVEHVRRSAKD

>1IYMA

AMDDGVECAVCLAELEDGEEARFLPRCGHGFHAECVDMWLGSHSTCPLCRLTVVV

>1J2FB

GAMSSLDNPTFPNLGPMSENPLKRLLVPGEEWFEVTAFYRGRQVFQQTISCPGLRLVGSEVG  
 DRTLPGWPVTLDPDGMSLTDRGVMSYVRHVLQSLGGGLALWRAGQWLWAQRLGHCHTYWAVSEEL  
 LPNSGHGPDGEVPKDKEGGVFDLGPFIIVDLITFTEGSGRSPRYALWFCVGESWPDQDPWTKRLVM  
 VKVVPTCLRALVEMARVGGASSLENTVDLHISNSHPLSLTSDQYKAYLQDLVEGMDFGQPGES

>1JE5B

MAKKIFTSALGTAEPYAYIAKPDYGNEERGFNPRGVYKVDLTI PNKDPRCQRMVDEIVKCHEEA  
 YAAAVEEYEANPPAVARGKKPLKPYEGDMPFFDNGDGTTFKFKCYASFQDKKTKETKHINLVV  
 DSKGKKMEDVPIIGGGSKLVKYSVLPYKWNATAVGASVKLQLESVMLVELATFGGGEDDWADEVE  
 ENGYVASGSAK

>1JEQB

MVRSGNKAAVVLCMDVGFMTSINSIPGIESPFQAKKVI TMFVQRQVFAENKDEIALVLFGTGTD  
 NPLSGGDQYQNTVHRHMLPDPFDLLEDIESKIQPGSQQADFLDALIVSMDVIQHETIGKKFEKR  
 HIEIFTDLSSRFSKSQLDIIHSLKKCDISLQFFLPPSLGKEDGSGDRGDGPFRLGGHGPSFPLK

GITEQQKEGLEIVKMMVISLEGEDGLDEIYSFSESLRKLKCVFKKIERHSIHWPCRLTIGSNLSIR  
IAAYKSILQERVKKTWTVVDAKTLKKEDIQKETVYCLNDDDETEVLKEDI IQGFRYGS DIVPFSK  
VDEEQMKYKSEGKCFSVLGFCKSSQVQRRFFMGNQVLKVFAARDDEAAVALSSLIHALDDLDMV  
AIVRYAYDKRANPQVGVAFFPHIKHNYECLVYVQLPFMEDLRQYMFSSLKNSKKYAPTEAQLNAVD  
ALIDSMSLAKKDEKTDLTLEDLFPPTKI PNPRFQRLFQCLLHRALHPREPLPIQQH IWNMLNPPA  
EVTTKSQIPLSKIKTLFPLIEAKKKDQVTAQE I FQDNHEDGPTAK

>1JEQA

MSGWESYKTEGDEEAEEEEQEENLEASGDYKYSGRDSLIFLVDASKAMFESQSEDELTPFDMSIQ  
CIQSVYISKI ISSDRDLLAVVFGTEKDKNVNFKNIVLQELDNPGAKRILELDQFKGQQGQKR  
FQDMMGHGSDYSLSEVLWVCANLFSQVQFKMSHKRIMLFTNEDNPHGNDSAKASRARTKAGDLRD  
TGIFLDMHLKPKGGFDISLFYRDI ISIAEDEDLRVHFEESKLEDLLRKVRAKETRKRLSRLK  
LKLNKDIVISVGIYNLVQKALKPPPIKLYRETNEPVKTKTRTFNTSTGGLLLPSDTKRSQIYGSR  
QIILEKEETEELKRFDGGLMLMGFKPLVLLKHHYLRPSLFVYPEESLVIGSSTLFSALLIKCL  
EKEVAALCRYTPRRNIPYFVALVPQEEELDDQKIQVTPPGFQLVFLPFADDKRKMPFTEKIMAT  
PEQVGMKAIVEKLRFTYRSDSFENPVLQQHFRNLEALALDLMEPEQAVDLTLPKVEAMNKRLGS  
LVDEFKELVYPPDYNPEGKVTKRKHDNEGSGSKRPKVEYSEEELKTHISKGTLGKFTVPMLEAC  
RAYGLKSGLKKQELLEALTKHFQD

>1JSPB

GSHMRKKIFKPEELRQALMPTLEALYRQDPESLFFRQFVDPQLLGI PDYFDIVKNPMDLSTIKRK  
LDTGQYQEPWQYVDDVWLMFNNAWLYNRKTSRVYKFC SKLAEVFEQEIDPVMQSLG

>1K99A

MKKLKKHPDFPKPLTPYFRFFMEKRAKYAKLHPEMSNDLTKILSKKYKELPEKKMKYIQDFQ  
REKQEFERNLARFREDHPDLIQNAKKEHHHHHH

>1KFTA

MGSSHHHHHSSGLVPRGSHMNTSSLETIEGVGPKRRQMLLKYMGGLQGLRNASVEEIAKVPGIS  
QGLAEKIFWSLKH

>1KIXA

MSTAAKQNRSTSRVSKKKTAAAPKEGAAKSDKGHKY EYVELAKASL TSAQPQH FYAVVIDATFPY  
KTNQERYICSLKIVDPTLYLKQQKGAGDASDYATLVLYAKRFEDLPIIHRAGDI IRVHRATLRLY  
NGQRQFNANVFYSSSWALFSTDKRSVTQEINNQDAVSDTTPFSFSSKHATIEKNEISILQNLKRW  
ANQYFSSYSVISSDMYTALNKAQAQKGFDDVAKILQVHELDEYTNELKLDASQV FYTSLKLL  
KFPHVRTGEVVRIRSATYDETSTQKKVLILSHYSNIITFIQSSKLAKELRAKIQDDHSVEVASLK  
KNVSLNAVVLTEVDKHAALPSTSLQDLFHHADSDKELQAQDTFRTQFYVTKIEPSDVKEWVKGY  
DRKTKKSSSLKGASGKDNI FQVQFLVKDASTQLNNNTYRVLLYTQDGLGANFFNVKADNLHKNA  
DARKKLEDSAELLTKFNSYVDAVVERRNGFYLIKDTKLIY

>1KKXA

MRGSGSHHHHHGSSNNKQYELFMKSLIENCKRNMPLQSIPEIGNRKINLFYLYMLVQKFGGADQ  
VTRTQQWSMVAQRLQISDYQQLES IYFRILLPYERHMISQEGIKETQAKRILQPSLIS

>1KN0A

MSGTEEA I LGGRD SHPAAGGGSVLCFGQCQYTAEEYQAIQKALRQRLGPEYI SSRMAGGGQKVCY  
IEGHRVINLANEMFGYNGWAHSITQQNVDFVDLNNGFYVGVCAFVRVQLKDGSYHEDVGYGVSE  
GLKSKALSLEKARKEAVTDGLKRALRSFGNALGNCILDKDYLRSLNKLPRQLPLEVDLTKAKRQD  
LEPSVEEARYNSCRPNM

>1KNUB

LNPEADLRALAKHLYDSYIKSFPLTKAKARAILTGKTTDKSPFVIYDMNSLMMGEDKIKFKHIT  
 PLQEQSKEVAIRIFQGCQFRSVEAVQEITEYAKSIPGFVNLDLNDQVTLKYGVEI IYTMLASL  
 MNKDGVLISEGQGFMTREFLKSRLKPFQGFMEPKFEFAVKFNALELDDSDLAIFIAVI ILSGDRP  
 GLLNVKPIEDIQDNLLQALELQLKLNHPSSQLFAKLLQKMTDLRQIVTEHVQLLQVIKKTETDM  
 SLHPLLQEIIYKDLY

>1KU9B

MIIMEEAKKLIIELFSELAKIHGLNKSVMGAVYAILYLSDKPLTISDIMEELKISKGNVSMKLL  
 EELGFVRKVVWIKGERKNYYEAVDGFSSIKDIAKRKHDLIAKTYEDLKKLEEKNEEEKEFIKQKI  
 KGIERMKKISEKILEALNDLDN

>1KW4A

METKRVNGTDRPPISSWSVDDVSNFIRELPGCQDYVDDFIQQEIDGQALLRLKEKHLVNAMGMKL  
 GPALKIVAKVESIKEVRDHHHHHH

>1KZYD

ALEEQRGPLPLNKTFLFLGYAFLLTMATTSCLKASRSKLPDGPTGSSEEEEFLEIPPFNKQYTES  
 QLRAGAGYIILEDNEAQCNTAYQCCLLIADQHCRTKRYFLCLASGIPCVSHVWVHDSCHANQLQNY  
 RNYLLPAGYSLEEQRILDWQPRENPFQNLKVLVSDQQQNFLELWSEILMTGGAASVKQHSSAH  
 NKDIALGVFDVVVTDSPSPASVLKCAEALQLPVVSQEWVIQCLIVGERIGFKQHHPKYKH DYVSH

>1L3AD

MASMTGGQQMGRGSDYFEPQQQQQQQQQQPQGASTPKVFGVYSIYKGAALTVEPRSPFSPLDS  
 GAFKLSREGMVLQFAPAAGVRQYDWSRKQVFLSVTEIGSIIISLGTKDSCEFFHDPNKGRSDEG  
 RVRKVLKVEPLPDGSGHFFNLSVQNKLINLDENIYIPVTKAEFAVLVSAFNFVMPYLLGWHTAVN  
 SFKPEDASRSNNANPRSGAELEWNLEHHHHHH

>1L8YA

MGKLPESPKRAEEIWQQSVIGDYLARFKNDRVKALKAMEMTWNMEKKEKLMWIKKAAEDQKRYE  
 RELSEMRAPPAATNSSKLEHHHHHH

>1MH3A

KIEEGKLVIIWINGDKGYNGLAEVGKKFEKDTGIKVTVEHPDKLEEKFPQVAATGDGPDIIFWAHD  
 RFGGYAQSGLLAEITPDKAFQDKLYPFTWDVAVRYNGKLIAYPIAVEALSIIYKNDLLPNPPKTWE  
 EIPALDKELKAKGSALMFNLQEPYFTWPLIAADGGYAFKYENGYDIKDVGVNDAGAKAGLTF  
 VDLIKNKHMNADTDYSIAEAAFNKGETAMTINGPWAWSNIDTSKVNYGVTVLPTFKGQPSKPFV  
 VLSAGINAASPNKELAKEFLENYLLTDEGLEAVNKDKPLGAVALKSYEEELAKDPRIAATMENAQ  
 KGEIMPNI PQMSAFWYAVRTAVINAASGRQTVDAALAAAQTAAAAAIS PQARAFLEQVFRKQSL  
 NSKEKEEVAKKCGITPLQVRVWFINKRMRSK

>1MOJA

MSTQKNARATAGEVEGSDALRMDADRAEQCVDALNADLANVYVLYHQLKHHHWNVEGAEFRDLHL  
 FLGEEAE TAEVADELAERVQALGGVPHASPETLQAEASVDVEDEDVYDIRTSLANDMAIYGDII  
 EATREHTELAENLGDHATAHMLREGLIELEDDAHHIEHYLEDDTLVTQGALE

>1MP9B

YIIPDEIPYKAVVNIENIVATVTLQTLDLYAMERSVPNVEYDPDQFPGLIFRLES PKITSLIFK  
 SGKMVVTGAKSTDELIAVVKRI IKTLKKGVMQLTGKPKIQIQNIVASANLHVIVNLDKAAFLLEN  
 NMYEPEQFPGLIYRMDEPRVLLIFSSGKMVITGAKREDEVHKAVKKIFDKLVELDCVKPVEEEE  
 LEF

>1MSZA

MGSLNGGSPGVEVSDQGDVDFRAMIVEFMASKKMQLEFPFSLNSHDLRVHQIAEEHGLRHDSG

EGKRRFITVSKRAGSHHHHHH

>1N1JB

GSHMEEIRNLTVKDFRVQELPLARIKKIMKLEDEDVKMISAEAPVLFKAAQIFITELTLRAWIHT  
EDNKRRTLQRNDIAMAITKFDQDFDLIDIVPR

>1N1JA

SFREQDIYLPANVARIMKNAIPQTGKIAKDAKECVQECVSEFISFITSEASERCHQEKRKTING  
EDILFAMSTLGFDSYVEPLKLYLQKFRE

>1NGNA

ALSPRRKRSFKKWTPPRSPFNLVQEILFHDPWKLLIATIFLNRTSGKMAIPVLWEFLEKYPSAEV  
ARAADWRDVSELLKPLGLYDLRAKTI IKFSDEYLTKQWRYPIELHGIGKYGNDSYRIFCVNEWKQ  
VHPEDHKLNKYHDWLWENHEKLSLS

>1NK2P

ASDGLPNKKRKRRLVFTKAQTYELERRFRQRYLSAPEREHLASLIRLTPTQVKIWFQNHRYKTK  
RAQNEKGYEGHP

>1NZPA

MAQPSSQKATNHNHHITEKLEVLAKAYSVQGDKWRALGYAKAINALKSFHKPVTSYQEACSIPIGI  
GKRMAEKIIEILESGLRKLHDH

>1O57A

MKFRRSGRVLDTNYLLTHPHELIPLTFFSERYESAKSSISEDLTIIKQTFEQQIGITLLTVPGA  
AGGVKIYIPKMKQAEAEFEVQTLGQSLANPERILPGGYVYLTDLGKPSVLSKVGKLFASVFAERE  
IDVVMTVATKGIPLAYAAASYLNVPVIVRKDNKVTEGSTVSINYVSGSSNRIQTMSLAKRSMKT  
GSNVLIIDDFMKAGGTINGMINLLDEFNANVAGIGVLVEAEGVDERLVDEYMSLLTLSTINMKEK  
SIEIQNGNFLRFFKDNLLKNGETESHHHHHH

>1OQJB

GAMEDMEIAYPITCGESKAILLWKKFVCPGINVKCVKFNQDLISPKHFVHLGKSTLKDWKRAIR  
LGGIMLRKMMDSGQIDFYQHDKVCSNTRSTK

>1OSVB

AELTVDQQTLLDYIMDSYSKQRMPEITNKILKEEFSAEENFLILTEMATSHVQILVEFTKRLPG  
FQTLDHEDQIALLKGSVAEAMFLRSAEIFNKKLPAHADLLEERIRKSGISDEYITPMFSFYKSV  
GELKMTQEEYALLTAIVILSPDRQYIKDREAVEKLEPPLDVLQKLCIKIYQPENPQHFACLLGR  
TELRTFNHHHAEMLSWRVNDHKFTPLLCEIWDVQ

>1OY3D

VFGYVTEGDGTALHLAVIHQHEPFLDFLLGFSAGHEYLDLQNDLGQTALHLAAILGEASTVEKLY  
AAGAGVLVAERGGHTALHLACRVRAHTCACVLLQPRPSHPRDASDTYLTQSQDCTPDTSHAPAAV  
DSQPNPENEEPRDEDWRLQLEAENYDGHTPLHVAVIHKDAEMVRLLRDAGADLNKPEPTCGRTP  
LHLAVEAQAASVLELLLKAGADPTARMYGGRTPLGSALLRPNPILARLLRAHGAPEPEDGGDKLS  
PCSSSGSDSDSDNRDEGDEYDD

>1OY3B

TAEKICRVNRNSGSLGGDEIFLLCDKVQKEDIEVYFTGPGWEARGSFSDADVHRQVAIVFRTP  
PYADPSLQAPVRVSMQLRRPSDRELSEPMFYQLPDTDDRHRIEKRKRRTYETFKSIMKKS PFNG  
PTEPRP

>1P1AA

GSHMQVTLKTLQQQTFKIDIDPEETVKALKEKIESEKGDFAFPVAGQKLIYAGKILNDDTALKEY  
KIDEKNFVVMVTKPKAVST

>1P4EC

SQFDILCKTPPKVLVRQFVERFERPSGEKIASCAAELTYLCWMITHNGTAIKRATFMSYNTIISN  
 SLSFDIVNKSLOFKYKTQKATILEASLKKLI PAWEFTIIPYNGQKHQSDITDIVSSLOLQFESSE  
 EADKGNSSHKMLKALLSEGESIWEITEKILNSFEYTSRFTKTKTLYQFLFLATFINCGRFS DIK  
 NVDPKSFKLVQNKYLGVI IQCLVTETKTSVSRHIYFFSARGRIDPLVYLDEF LRNSEPVLKRVNR  
 TGNSSSNKQEYQLLKDNLVRSYNKALKKNAPYPIFAIKNGPKSHIGRHLMTSFLSMKGLTELTNV  
 VGNFSDKRASAVARTTYTHQITAI PDHYFALVSRYAYDPISKEMIALKDETNPIEEWQHIEQLK  
 GSAEGSIRYPAWNGIISQEVLDYLSSYINRRIGHHHHHH

>1P4WA

MRGSHHHHHHGSYTPESVAKLLEKISAGGYGDKRLSPKESEVLRLFAEGFLVTEIAKKLNRSIKT  
 ISSQKKSAMMKLGVDNDIALLLNYLSSVSMTPVDK

>1P92A

MKDLVDTTTEMYLRTIYELEEEGVTPLRARIAERLEQSGPTVSQTVARMERDGLVVVASDRSLQMT  
 PTGRTLATAVMRKARLAERLLTDIIGLDINKVHDEACRWEHVMSDEVERRLVKVLKDVSRSPFGN  
 PIPGLDELGVGNSDAAAPGTRVIDAATSMPRKVRIVQINEIFQVETDQFTQLLDADIRVGSEVEI  
 VDRDGHITLSHNGKDVELLDDLAHTIRIEEL

>1PGZA

SKSESPKEPEQLRKLFIGGLSFETTDESLSRSHFEQWGTLTDCVVMRDPNTRSRGFGFVTYATVE  
 EVDAAMNARPHKVDGRVVEPKRAVSREDSQRPGAHLTVKKIFVGGIKEDTEEHHLRDYFEQYGKI  
 EVIEIMTDRGSGKRGFAFVTFDDHDSVDKIVI QKYHTVNGHNCEVRKALSKQEMASASSQRGR

>1PH1B

PQQQSAFKQLYTELFNNEGDFSKVSSNLKPLKCYVKESYPHFLVTDGYFFVAPYFTKEAVNEFH  
 AKFPNVNIVDLTDKIVIVINNWSLELRRVNSAEVFTSYANLEARLIVHSFKPNLQERLNPNTRYPVN  
 LFRDDEFKTTIQHFRHTALQAAINKTVKGDNLVDISKVADAAGKKGVDAGIVKASASKGDEFSD  
 FSFKEGNTATLKIADIFVQEKG

>1PL5S

SNTTEILTSVDVLGTHSQTGTQQSNMYTSTQKTELEIDNKDSVTECSKDMKEDGLSFVDIVLSKA  
 ASALDEKEKQLAVANEIIRSLSDVEMRNEIRITSLQGDLTFTKKLENARSQISEKDAKINKLME  
 KDFQVNKEIKPY

>1POGA

RGSHMRRRKRRTSIETNIRVALEKSFLNQKPTSEEITMIADQLNMEKEVIRVWFCNRRQKEKRI  
 DI

>1PVEA

GSHMPLEFLRNQPQFQOMRQIIQQNPSLLPALLOQIGRENPQLLQQISQHQEHFIQMLNEPVQEA  
 GGQGGGG

>1Q1VA

DEPLIKKLLKPPPTDEELKETIKKLLASANLEEVMTKQICKKVYENYPTYDLTERKDFIKTTVKEL  
 ISLEH

>1Q87B

PVNTKRSNGTKRVEFPPTTKKSMCIGNSTPNEQETFRAKVDEIWFRLTQKTDGTVMRDFLIEKAAE  
 YFKQPEQPQN AIEVISAIMAPQEEQTKSKADLYKFLAMFGPYETIMLKIASLLLSNNKGHWLT  
 FDPQAEKNANNQRDSISGWFDQNEPNCLILKTPTGIRKIWNKPLIEATGQYLMDENGEKYDSWDK  
 YFEMKPIETYLTAYPTFAPMHHHHHH

>1QZGB

GPGGEDVIDSLQLNELLNAGEYKIGELTFQSIRSSQELQKNTIVNLFVIGVDFTPSRQSLHGTK  
 DWVTTVYLWDPTCDTSSIGLQIHLFSKQGNLDPVIKQVGPPLLLHQITLRSYRDRTQGLSKDQFR  
 YALWPDFSSNSKDTLCPQMPRLMKTGDKEEQFALLLNKIWDEQTNKHKNGELLSTS

>1QZQB

MEEYMPTEHHHHHENLYFQGTSGEGQDIWDMLDKGNPFQFYLTRVSGVKPKYNSGALHIKDILS  
 PLFGTLVSSAQFNCFDWDLVKQYPPEFRKKPILLVHGDKREKAHLHAQAKPYENISLCQAKL  
 DIAFGTHHTKMMLLLYEEGLRVVIHTSNLIHADWHQKTQGIWLSPLYPRIADGTHKSGESPTHFK  
 ADLISYLMAYNAPSLKEWIDVIHKHDLSETNVYLIGSTPGRFQGSQKDNWGHFRLKLLKDHASS  
 MPNAESWPVVGQFSSVGLGADESKWLCSEFKESMLTLGKESKTPGKSSVPLYLIYPSVENVRTS  
 LEGYPAGGSLPYSIQTAEKQNLHSYFHKWSAETSGRSNAMPHIKTYMRPSPDFSKIAWFLVTS  
 NLSKAAWGALEKNGTQLMIRSVELGVFLPSAFGLDSFKVKQKFFAGSQEPMATFPVPYDLPEL  
 YGSKDRPWIWNIPIYVKAPDTHGNMWVPS

>1R5KC

MDPMIKRSKNSLALSALTADQMVSALLDAEPPILYSEYDPTRPFSEASMMGLLTNLADRELVHMI  
 NWAKRVPGFVDLTLHDQVHLLCAWLEILMIGLVWRSMHEHPGKLLFAPNLLLDNRNQKCVGEMVE  
 IFDMLLATSSRFMMNLQGEFVCLKSIILLNSGVYTFLSSTLKSLEEKDHIHRVLDKITDTLIH  
 LMAKAGLTLQQHQRLAQLLLILSHIRHMSNKGMEHLYSMKCKNVVPLYDLLLEMLDAHRLHAPT  
 S

>1RH6B

MYLTLQEWNARQRRPRSLETVRRWVRESRIFPFVKDGREYLFHESAVKVDLNRP

>1RI7A

MGSSHHHHHSSGLVPRGSHMRVPLDEIDKKIKIKILQNDGKAPLREISKITGLAESTIHERIRKL  
 RESGVIKKFTAIIDPEALGYSMLAFILVKVAGKYSEVASNLAKYPEIVEVYETTGDYDMVVKIR  
 TKNSEELNFDLIGSIPGVEGHTMTMIVLTKHKTTELPIK

>1RIFB

MDIKVHFHDFSHVRIDCEESTFHELDRDFFSFEADGYRFNPRFRYGNWDGRIRLLDYNRLLPFGLV  
 GQIKKFCDNFGYKAWIDPQINEKEELSRKDFDEWLSKLEIYSGNKRIEPHWYQKDAVFEGLVNR  
 RILNLPTSAGRSLIQALLARYYLENYEGKILIIVPTTALTQMADDFVDYRLFSSHAMIKKIGGGA  
 SKDDKYKNDAPVVVGTWQTVVKQPKWFSSQFGMMMNDECHLATGKSISSIIISGLNNCMFKFGLSG  
 SLRDGKANIMQYVGMFGEIFKP

>1RW2A

MHHHHHKLKTEQGGAHFSVSSLAEGSVTSVGSVNPAENFRVLVKQKASFEASNQLINHIEQF  
 LDTNETPYFMKSIDCIRAFREEAIKFSEEQRFNFLKALQEKVEIKQLNHFEIVVQDGITLITK  
 EEASGSSVTAEAAKKFLAPKDK

>1S6MA

MLSHMVLTRQDIGRAASYEDGADDYYAKDGDASEWQKGAEELGLSGEVDSKRFRELLAGNIGE  
 GHRIMRSATRQDSKERIGLDLTFSAKSVSLQALVAGDAEIIKAHDRAVARTLEQAEARAQARQK  
 IQGKTRIEETGNLVIGKFRHETSRRERDPQLHTHAVILNMTKRSQWRALKNDEIVKATRYLGAV  
 YNAELAHELQKLGQQLRYGKDGNDLAHIDRQQIEGFSKRTEQIAEWYAARGLDPNSSVSLEQKQA  
 AKVLSRAKKTSDREALRAEWQATAKELGIDFS

>1SD4B

MTNKQVEISMAEWDVMNIIWDKKSVSANEIVVEIQKYKEVSDKTIRTLITRLYKKEIIKRYKSEN  
 IYFYSSNIKEDDIKMKTAKTFLNKLYGGDMKSLVLFNAKNEELNNKEIEELRDILNDISK

>1SE8A



MARGMNHVYLIGALARDPELRYTGNGMAVFEATVAGEDRVI GNDGRERNLPWYHRVSI LGKPAEW  
 QAERNLKGDAVVVEGTLEYRQWEAPEGGKRSVAVNVKALRMEQLGTQPELIQDAGGGVRMSGAMN  
 EVLVLGNVTRDPEIRYTPAGDAVLSLSIAVNENYQDRQGQRQEKVHYIDATLWRDLAENMKELRK  
 GDPVMIMGRLVNEGWTDDKGNKRNRSTRVEATRVEALARGAGNANSGYAAATPAAPRTQTASSAAR  
 PTSGGYQSQPSRAANTGSRSGGLDIDQGLDDFPPEEDDLPF

>1SFUB

MDLLSCTVNDAEIFSLVKKEVLSLNTNDYTTAISLSNRLKINKKKINQQLYKLQKEDTVKMVPSN  
 PPKWFKNYNC

>1SQ8A

MLMGERIRARRIQLGLNQAELAQKVGVDQQAIEQLENGKAKRPRFLPELARALGVAVDWLLNGA

>1T0FC

GSAIKVVKPSDWDSLPTDLRYIYSQRQPEKTMHERLKGKGVIVDMASLFKQAG

>1T0FA

GSAMAKANSSFSEVQIARRIKEGRGQGHGKDYIPWLTVQEVPSGRSHRIYSHKTGRVHLLSDL  
 ELAVFLSLEWESSVLDIREQFPLLPSDTRQIAIDSGIKHPVIRGVDQVMSTDFLVDCKDGPFEQF  
 AIQVKPAAALQDERTLEKLELERRYWQQQIPWFIPTDKEINPVVKENIEWLYSVKTEEVSAELL  
 AQLSPLAHILQEKGDENIINVCKQVDIAYDLELGLKTLSEIRALTANGFIKFNIIKSFRAKCADL  
 CISQVVNMEELRYVAN

>1T23A

SNTRNFVLRDEDGNEHGVFTGKQPRQAALKAANRSGTKANPDIIRLRERGTKKVHVFKAWKEIV  
 DAPKNRPAMPEKISKPFVKKERIEKLE

>1U2WD

MKKKDTCEIFGYDEEKVNRIQGDQLQTVDISGVSQILKAIADENRAKITYALCQDEELCVCDIANI  
 LGVTIANASHHLRRTLYKQGVVFRKEGKLALYSLGDEHIRQIMMIALAHKKEVKVNV

>1U3EM

MEWKDIKGYEGHYQVSNTGEVYSIKSGKTLKHQIPKDGYHRIGLFGGKGTQVHRLVAIHFC  
 GYEGLVVDHKDGNKDNLSLNLRWVTQKINVENQMSRGTNLVSKAQQIAKIKNQKPIIVISPDG  
 IEKEYPSTKCACEELGLTRGKVTDLKGHRIHHKGYTFRYKLN

>1U78A

MPRGSALSDTERAQLDVMKLLNVSLHEMSRKISRSRHCIRVYLKDPVSYGTSKRAPRRKALSVRD  
 ERNVIRAANSCKTARDIRNELQLSASKRTILNVIKRSQVIVRQKLRPAPLLSADHKLKRLEFAK  
 NNMGTHHHHHH

>1U9NA

MGSSHHHHHSSGLVPRGSHVTTSAASQASLPRGRRTARPSGDDRELAILATAENLLEDRLADI  
 SVDDLAKGAGISRPTFYFYFPSKEAVLLTLLDRVVNQADMALQTLAENPADTDRENMWRTGINVF  
 FETFGSHKAVTRAGQAARATSVEVAELWSTFMQKWIAYTAAVIDAERDRGAAPRTLPAHELATAL  
 NLMNERTLFASFAGEQPSVPEARVLDTLVHIWVTSIYGENR

>1UB4C

GPHMIHSSVKRWGNPAVRIPATLMQALNLNIDDEVKIDLVDGKLIIEPVRKEPVFTLAELVNDI  
 TPENLHENIDWGEPKDKEVW

>1UB4B

VSRYVPDMGDLIWDVDFPTKGSEQAGHRPAVVLSPFMYNNKTGMCLCVPCTTQSKGYPFVVLVSG  
 QERDGVVALADQVKSIAWRARGATKKGTVAPEELQLIKAKINVLIG

>1UDVB

MTEKLNIEIVVRKTKNVEDHVLDVIVLNFQGIDEVILKGTGREISKAVDVYNSLKDRLDGQVQLVN  
VQTGSEVRDRRRRISYILLRLKRVY

>1UFID

GSHMPVPSFGEAMAYFAMVKRYLTSFPIDDRVQSHILHLEHDLVHVTRKNHARQAGVRGLGHQS

>1UKLF

RSSINDKIIELKDLVMGTDAKMHKSGVLRKAIDYIKYLQQVNHKLRQENMVLKLANQKNKL

>1UKLB

MELITILEKTVSPDRLELEAAQKFLERAAVENLPTFLVELSRVLANPGNSQVARVAAGLQIKNSL  
TSKDPDIKAQYQQRWLAI DANARREVKNYVLQTLGTETYPSSASQCVAGIACAEIPVSQWPELI  
PQLVANVTNPNSTEHMKESTLEAIGYICQDIDPEQLQDKSNEILTAI IQGMRKEEPSNNVKLAAT  
NALLNSLEFTKANFDKESERHFIMQVVCEATQCPDTRVRVAALQNLVKIMSLYYQYMETYMGPAL  
FAITIEAMKSDIDEVALQGIEFWSNVCDEEMDLAIEASEAAEQGRPPEHTSKFYAKGALQYLVPI  
LTQTLTKQDENDDDDDDWNPCKAAGVCLMLLSTCCEDDIPHVLPFIKEHIKNPDWRYRDAAVMAF  
GSILEGPEPNQLKPLVIQAMPTLIELMKDPSVVVRDTTAWTVGRICELLPEAAINDVYLAPLLQC  
LIEGLSAEPRVASNVCWAFSSLAEEAAYEADVADDQEEPATYCLSSSFELIVQKLETTDRPDGH  
QNNLRSSAYESLMEIVKNSAKDCYPAVQKTTLVIMERLQQVLQMESHIQSTSDRIQFNDLQSLLC  
ATLQNVLRKVQHQDALQISDVVMASLLRMFQSTAGSGGVQEDALMAVSTLVEVLGGEFLKYMEAF  
KPFGLGIGLKNYA EYQVCLAAVGLVGDLCRALQSNILPFCDEVMQLLLENLGNENVHRSVKPQILS  
VFGDIALAIGGEFKKYLEVVNLTLQQASQAQVDKSDFDMDVYLNELRESCLEAYTGIVQGLKGDQ  
ENVHPDVMLVQPRVEFIFLSFIDHIAGDEDHTDGVVACAAGLIGDLCTAFGKDVLLKVEARPMIHE  
LLETEGRRSKTNKAKTLATWATKELRKLKNQA

>1UL1Z

GIQGLAKLIADVAPSAIRENDIKSYFGRKVAIDASMSIYQFLIAVRQGGDVLQNEEGETTSHLMG  
MFYRTIRMMENGIKPVYVFDGKPPQLKSGELAKRSERRAEAEKQLQQAQAAGAEQVEKFTKRLV  
KVTKQHNDCKHLLSLMGIPYLDAPSEAEASCAALVKAGKVYAAATEDMDCLTFGSPVLMRHLTA  
SEAKKLP IQEFHLSRILQELGLNQE QFV DLCILLGSDYCESIRGIGPKRAVDLIQKHKSIEEIVR  
RLDPNKYPVPENWLHKEAHQLFLEPEVLDPESELKWSEPNEEELIKFMCGEKQFSEERIRSGVK  
RLSKSRQGSTQGRLLDDFFKVTGSLSSAKRKEPEPKGSTK K KAKTGAAGKFKRGK

>1UL4A

GSSGSSGLRLCQVDRCTADMKEAKLYHRRHKVCEVHAKASSVFLSGLNQRFCQQCSRFDLQEFD  
EAKRSCRRLAGHNERRRKSSGESGPSSG

>1ULYA

MAKKVKVITDPEVIKVMLEDTRRKILKLLRNKEMTISQLSEILGKTPQTIYHHIEKLKEAGLVEV  
KRTEMKGNLVEKYYGRTADV FYINLYLGDEELRYIARSRLKTKIDIFKRLGYQFEENELNIMDR  
MSQKEFDATVRISKYIEEKEDALKDFSNEIDIHAIEWLSTAELARDEEYLELLKRLG SILKR

>1USTA

KKEEASSKSYRELIIEGLTALKERKGS SRPALKKFIKENYPIVGSASNFDLYFNNAIKKVEAGD  
FEQPKGPAGAVKLAKKKSPEVKKEKEVS

>1UVHD

MTSFTIPGLSDKKASDVADLLQKQLSTYNDLHLTLKHVHWNVVGPNFIGVHEMIDPQVELVRGYA  
DEVAERIATLGKSPKGTPGAIIKDRTWDDYSVERDTVQAHLAALDLVYNGVIEDTRKSIEKLEDL  
DLVSQDLLIAHAGELEKQFQVRAHLESAGGQLTHEGQSTEKGAADKARRKSA

>1V63A

GSSGSSGPKKPPMNGYQKFSQELLSNGELNHLPLKERMVEIGSRWQRISQSQKEHYKLAEEQQR

QYKVHLDLWVKSLSLSPQDRAAYKEYISNKRKSGPSSG

>1VJFA

MGSDKIHSHHHMKTRADLFAFFDAHGVDHKTLDHPPVFRVEEGLEIKAAMPGGHTKNLFLKDAK  
GQLWLISALGETTIDLKLLHHVIGSGRLSFGPQEMMLETLGVTGPGSVTAFGLINDTEKRVRFVLD  
KALADSDPVNFHPLKNDATTAVSQAGLRRFLAALGVEPMIVDFAAMEVVG

>1WEOA

GSSGSSGPKPLKNLDGQFCEICGDQIGLTVEGDLFVACNECGFPACRPCYEYERREGTQNCPOCK  
TRYKRLRGS PRVEGDEDEEDIDSGPSSG

>1WEPA

GSSGSSGMALVPVYCLCRQPYNVNHFMIECGLCQDWFHGSVGVIEEENAVDIDIYHCPDCEAVFG  
PSIMKNWHS GPSSG

>1WEUA

GSSGSSGSPEYGMPSVTFGSVHPSDVLDMVPDPNEPTYCLCHQVSYGEMIGCDNPDCSIEWFHFA  
CVGLTTKPRGKWFPCPRCSQESGPSSG

>1WEWA

GSSGSSGEDPFQPEIKVRCVCGNSLETDSMIQCEDPRCHVWQHVGCVILPDKPMDGNPPLPESFY  
CEICRLTSGPSSG

>1WG2A

GSSGSSGSPSRPVRPNNRCFSCNKKVGMGFKCKCGSTFCGSHRYPEKHECSFDFKEVGS GPSSG

>1WG6A

GSSGSSGLKGEPCYALSLESSEQLTLEIPLNDSGSAGLGVSLKGNKSRETGTDLGIFIKSIIHG  
GAAFKDGRRLMNDQLIAVNGETLLGKSNHEAMETLRRSMSMEGNIRGMIQLVILRRSGPSSG

>1WH5A

GSSGSSGSSAEAGGGIRKRHRTKFTAQKERMLALAERIGWRIQRQDDEVIQRFCQETGVPRQVL  
KVWLHNNKHSGPSSG

>1WI3A

GSSGSSGPRSRTKISLEALGILQSFIDHVGLYPDQEAIHITLSAQLDLPKHTTIKFFQNRQRYHVKH  
SGPSSG

>1WIJA

GSSGSSGSQFVLQDLQDATLGSLLSSLMQHCDPPQRKYPLEKGT PPPWPTGNEEWWKLGLPKS  
QSPPYRKP HDLKKMVKVGLTAVINHMLPDI AKIKRHVRQSKCLQDKMTAKESAIWLAVLNQEES  
LIQQSGPSSG

>1WJ2A

GSSGSSGVQTTSEVDLLDDGYRWRKYGQVVKGNPYPRSYKCTTPGCGVRKHVERAATDPKAVV  
TTYEGKHNDLPA

>1WJVA

GSSGSSGMVFFTCNACGESVKKIQVEKHVSNCRNCECLSCIDCGKDFWGDDYKSHVKCISEGQKY  
GGKGYEAKSGPSSG

>1WPKA

MKKATCLTDDQRWQSVLARDPNADGEFVFAVRTTGIFCRPSCRARHALRENVSFYANASEALAAG  
FRPCKRCQPEKANAQQHRLDKITHACRLLEQETPVTLALADQVAMSPFHLHRLFKATTGMTPKA  
WQQAWRARRLRESLAK

>1X3CA

GSSGSSGRKKPVSQSLEFPTRYSPYRYPYRCVHQGCFAAFTIQQNLILHYQAVHKS DLPAFSAEVE

EESGPSSG

>1X51A

GSSGSSGPRKASRKPPREESSATCVLEQPGALGAQILLVQRPNSGLLAGLWEFSPVTWEPSEQLO  
RKALLQELQRWAGPLPATHLRHLGEEVHTFVSHIKLTYQVYGLALEGQTPVTTVPPGARWLTQEEF  
HTAAVSTAMKKVFRVYQGGQSGPSSG

>1X57A

GSSGSSGDRVTLEVGVKVIQQGRQSKGLTQKDLATKINEKPQVIADYESGRAIPNNQVLGKIERAI  
GLKLRGKDIGKPIEKGPRAKSGPSSG

>1X6FA

GSSGSSGLKRDFIILGNGPRLQNSTYQCKHCDSKLQSTAELTSHLNIHNEEFQKRAKRQERRKQL  
LSKQKYADGAFADFKQESGPSSG

>1XCBA

MKVPEAAISRLLITYLRILEEELEAQGVHRTSSEQLGELAQVTAQVRKDLSYFGSYGTRGVGYTVP  
VLKRELRHILGLNRKWGLCIVGMGRGLSALADYPGFGESFELRGFFDVDPEKVGPRVRRGGVIEHV  
DLLPQRVPGRIEIALLTVPREAAQKAADLLVAAGIKGILNFAPVVLEVPKEVAVENVDFLAGLTR  
LSFAILNPKWREEMMG

>1XD7A

MSLINSRLAVAIHILSLISMDEKTSSEIIADSVNTNPVVRRMISLLKKADILTSRAGVPGASLK  
KDPADISLLEVYRAVQKQEELFAVHENPNPKCPVGKKIQNALDETFESVQRAMENELASKSLKDV  
MNHLFEGGSHHHHHH

>1XNAA

MPEIRLRHVVSCSSQDSTHCAENLLKADTYRKYRAAKAGEKTI SVVLQLEKEEQIHSVDIGNDGS  
AFVEVLVGSSAGGAGEQDYEVLLVTSSFMSPSESRSGSNPNRVRMFGPKLVRAAAEKRWDRVKI  
VCSQPYSKDSPFGLSFVRFHSPDKDEAEAPSQKVTVTKLGQFRVKEEEESAN

>1XP8A

GSHMSKDATKEISAPTDAKERSKAIETAMSQIEKAFGKGSIMKLGAEKLDVQVVSTGSLSLDLA  
LGVGGIPRGRITEIYGPESGGKTTLALAIVAQAQKAGGTCAFIDAHALDPVYARALGVNTDELL  
VSQPDNGEQALEIMELLVRSGAIDVVVVSVAALTPRAEIEGDMGDSLPLQARLMSQALRKLTA  
ILSKTGTAAFINQVREKIGVMYGNPETTTGGRALKFYASVRLDVRKIGQPTKVGNDAVANTVKI  
KTVKNKVAAPFKEVELALVYGKGFQDLSDLVGLAADMDI IKKAGSFYSYGDERIGQGKEKTIAYI  
AERPEMEQEIRDRVMAAIRAGNAGEAPALAPAPAAPEAAEA

>1XV9B

PVQLSKEQEELIRTLGHAHTRHMGTMFEQFVQFRPPAHLFIHHQPLPTLAPVLPLVTHFADINTF  
MVLQVIKFTKDLPVFRSLPIEDQISLLKGAAVEICHIVLNTTFCLQTQNFCLGPLYRTIEDGARV  
GFQVEFLELLFHFGTLRKLQEQEPEYVLLAAMALFSPDRPGVTQRDEIDQLQEEMALTLQSYIK  
GQQRPRDRFLYAKLLGLLAELRSINEAYGYQIQHIQGLSMMPLLOEICS

>1XWRD

MVRANKRNEALRIESALLNKIAMLGTEKTAEAVGVDSQISRWKRDWIPKFSMLLAVLEWGVVDD  
DMARLARQVAAILTNKKRPAATERSEIQIEMEF

>1Y6UA

AGHMKQTDIPIWERYTLTIEEASKYFRIGENKLRLRLAEENKNANWLMNGNRIQIKRKQFEKIID  
TLDAI

>1YD6A

MNERLKEKLAVLPEQPGCYLMKDKHGTVIYVGKAKSLKERVRSYFTGTHDGKTQRLVEEIADFEY

IVTSSNAEALILEMNLIKKHDPKYNVMLKDDKSY

>1YDXA

MGHHHHHHHHHSSGHIDDDDKHMTPKLKLNNNINWTKRTIDSLFDLKKGEMLEKELITPEGKYE  
 YFNGGVKNSGRDTKFNTEFKNTISVIVGGSCGYVRLADKNFFCGQSNCTLNLLDPLELDLKFAYYA  
 LKSQQERIEALAFGTTIQNIRISDLKELEIPFTSNKNEQHAIANTLSVFDERLENLASLIEINRK  
 LRDEYAHKLFSLDEAFLSHWKLEALQSQMHEITLGEIFNFKSGKYLKSEERLEEGKFPYYGAGID  
 NTGFVAEPNTEKDTISIIISNGYSLGNIRYHEIPWFNGTGSIALEPMNNEIYVPPFFYCALXYLQKD  
 IKERMKSDDSPFLSLKLAGIIVKPYVKSFLQQRKAGKIVFLLDQKLDQYKKESSSLTVIRDITLLK  
 KLFPDMTERTKSIKDY

>1YIOA

MTAKPTVFVDDMSVREGLRNLLRSAGFEVETFDCASTFLEHRRPEQHGCLVLDMRMPGMSGIE  
 LQEQLTAISDGIPIVFI TAHGDI PMTVRAMKAGAIEFLPKPFEEQALLDAIEQGLQNAERRQAR  
 ETQDQLEQLFSSLTGREQQVLQLTIRGLMNKQIAGELGIAEVTVKVHRHNIMQKLNVRSLANLVH  
 LVEKYESFERGVS

>1YJMC

MSQLGSRGRLWLQSPTGGPPP IFLPSDQALVLRGRLTQVTRKCSRNOVELIADPESRTVAVK  
 QLGVPSTVGVHELKPLSGSLSLGDVLYLVNGLYPLTLRWEELS

>1YSEA

GSHVSRSMNKPQQVSTNTEVSSEIYQWVRDELKRAGISQAVFARVAFNRTQGLLSEILRKEED  
 PKTASQSLVNL RAMQNFLQLPEAERDRIYQDERERSLNAASAMGPAPLISPPSRPPQVKTATI  
 ATERNKGPENN

>1YUAA

MNGEVAPPKEDPVPLPELPCEKSDAYFVLRDGAAGVFLAANTFPKSRETRAPLVEELYRFRDRLP  
 EKLRYLADAPQQDPEGNKTMRFRSRKTKQQYVSSEKDGKATGWSAFYVDGKWVEGKK

>1YUIA

PKAKRAKHPPGTEKPRSRSQSEQPATCPICYAVIRQSRNLRRHLELRHFAKPGV

>1Z1BB

MGRRRSHERRDLPPNLYIRNNGYYCYRDPRTGKEFGLGRDRRIAITEAIQANIELEFSGHKHKPLT  
 ARINSDNSVTLHSLDRYEKILASRGIKQKTLINYMSSKIKAIRRGLPDAPLEDITTKIEAAMLNG  
 YIDEGKAASAKLIRSTLSDAFREAIAEGHITTNHVAATRAAKSKVRRSRLTADEYKLYQAAESS  
 PCWLRRLAMELAVVTGQRVGDLCEMKWSDIVDGYLYVEQSKTGVKIAIPTALHIDALGISMKETLD  
 KCKEILGGETIIASTRREPLSSGTVSRYFMRARKASGLSFEGDPPTFHLELRSL SARLYEKQISDK  
 FAQHLLGHKSDTMASQYRDDRGREWDKIEIK

>1Z4HA

MQHELQPDSDLVLDLKFIMADTGFGKTFIYDRIKSGDLPKAKVIHGRARWLYRDHCEFKNKLLSRAN  
 G

>1Z91A

MENKFDHMKLENQLSFLLYASSREMTKQYKPLLDKLNITYPQYLALLLLWEHETLTVKMKGEQLY  
 LDSGTLTPMLKRMEQQGLITRKRSEEDERSVLISLTEDGALLKEKAVDIPGTILGLSKQSGEDLK  
 QLKSALYTLLETTLHQKN

>1ZAEB

HMDKTVNLSACEVAVLDLYEQSNIRIPSDIIEDLVNQRLQSEQEVNLNIETQRTYWKLENQKKLY  
 RGSLK

>1ZI0B

TQEDVVVTLSSHQGYVKYQPLSEYEAQRRGGKGSAAARIKEEDFIDRLLVANTHDHILCFSSRGRV  
 YSMKVYQLPEATRARGRPIVNLLPLEQDERITAILPVTEFEEGVKVFMATANGTVKKTVLTEFN  
 RLRTAGKVAIKLVDGDELIGVDLTSGEDEVMLFSAEGKVVRFKESSVRAMGCNTTGVRGIRLGE  
 DKVVSLIVPRGDGAILTATQNGYGKRTAVAEYPTKSRATKGVISIKVTERNGLVVGAVQVDDCDQ  
 IMMITDAGTLVRTRVSEISIVGRNTQGVILIRTAEDENVVGLQRVAE

>1ZP7B

MIRYPNGKTFQPKHSVSSQNSQKRAPSYSNRGMTLEDDLNETNKYYLTNQIAVIHKKPTPVQIVN  
 VHYPKRSAAVIKEAYFKQSSTTDYNGIYKGRYIDFEAKETKNKTSFPLQNFHDHQIEHMKQVKAQ  
 DGICFVIIISAFDQVYFLEADKLFYFWRKEKNGRKSIRKDELEETAYPISLGYAPRIDYISIIEQ  
 LYFSPSSGAKG

>1ZRJA

GSSGSSGMDVRRLLKVNELREELQRRGLDTRGLKAELAERLQAALSGPSSG

>1ZS3A

MITKLMIDEKYAKELDKAEIDHHKPTAGAMLGHVLSNLFIEINIRLTQAGIYAKSPVKCEYLREIA  
 QREVEYFFKISDLLLDENEIVPSTTEEFKLYHKFITEDPKAKYWTDEDLLESFIVDFQAQNMFIT  
 RAIKLANKEEFALAAAGVVELYGYNLQVIRNLGDLGKSVADFHDEDEDNDN

>1ZZKA

GAMGPIITTQVTIPKDLAGSIIGKGGQRIKQIRHESGASIKIDEPLEGSEDRIITITGTQDQIQN  
 AQYLLQNSVKQYSGKFF

>2A1IA

MGSSHHHHHSQDPAKSNSIIVSPRQRGNPVLKFNVRNVPWEFGDVIIPDYVLGQSTCALFLSLRYH  
 NLHPDYIHGRLQSLGKNFALRVLLVQVDVKDPQQALKEKELAKMCILADCTLILAWSPEEAGRYLET  
 YKAYEQKPADLLMEKL

>2A1JB

MGSSHHHHHSQDPADLLMEKLEQDFVSRVTECLTTVKSVNKTDSQTLTTFGSLEQLIAASRED  
 LALCPGLGPQKARRLFDVLHEPFLKV

>2A1JA

MPQDFLLKMPGVNAKNCRSLMHHVKNIAELAALSQDELTSILGNAANAKQLYDFIHTSFAEVV

>2ADLB

MKQRIITVTVSDSYQLLKAYDVNISGLVSTTMQNEARRLRAERWKVENQEGMVEVARFIEMNGSF  
 ADENKDW

>2AIFA

GSSQNEASEDTGFNPKAFPLASPDLNKIINLVQQACNYKQLRKGANEATKALNRGIAEIVLLAA  
 DAEPLEIILLHLPLVCEDKNTPYVFVRSKVALGRACGVSRPVIAAAITSKDGSSLSQITELKDQI  
 EQILV

>2ALCA

GSMADTRRRQNHSCDPCRKGKRRCDAPENRNEANENGWVSCSNCKRWNKDCTFNWLSQRSKNSS

>2AN7B

MSRLTIDMTDQQHQSLKALAAALQGKTIKQYALERLFFGDADADQAWQELKTM LGNRINDGLAGKV  
 STKSVGEILDEELSGDRA

>2AQLB

MNRVEVKVKIPEELKPWLVDWDLITRQKQLFYLPKKNVDSILEDYANYKKSARGNTDNKEYAVN  
 EVVAGIKEYFNVMLGTQLLYKFERPQYAEILADHPDAPMSQVYGAPHLRLRFVIRIGAMLAYTPLD  
 EKSLALLLNLYLHDFLKYLAKN SATLFSASDYEVAPPEYHRKAV

>2ATQB

MKGFSSSEDKGEWKLKLDASGNGQAVIRFLPAKTDDALPFAILVNHGFKKNGKWIETCSSTHG DY  
 DSCPVCQYISKNDLYNTNKTEYSQLKRKTSYWANILVVKDPQAPDNEGKVFYKRFYKGIWDKINA  
 MIAVDTEMGETPVDVTCPWEGANFVLKVKQVSGFSNYDESKFLNQSAIPNIDDES FQKELFEQMV  
 DLSEMTSKDKFKSFEELNTKFNQVLGTAALGGAAAAAAS

>2ATQA

MKEFYLTVEQIGDSIFERYIDSNGRERTREVEYKPSLFAHCPESQATKYFDIYGKPCTRKLFANM  
 RDASQWIKRMEDIGLEALGMDDFKLAYLSDTYNYEIKYDHTKIRVANFDIEVTS PDGFPEPSQAK  
 HPIDAITHYDSIDDRFYVFDLLNSPYGNVEEWSIEIAAKLQEQQGDEVPSEIIDKIIYMPFDNEK  
 ELLMEYLNFWQQKTPVILTGWNVESFAIPYVYNRIKNI FGESTAKRLSPHRKTRVKVIENMYGSR  
 EIIITLFGISVLDYIDLYKKFSFTNQPSYSLDYISEFELNVGKLYDGPISKLRNSNHQRYISYNI  
 IAVYRVLQIDAKRQFINLSLDMGYAKIQIQSVFSPIKTWDAIIFNSLKEQNKVI PQGRSHPVQP  
 YPGAFVKEIPNRYKYVMSFDLTSLYPSIIRQVNISPETIAGTFKVAPLHDYINAVAE RPSDVYS  
 CSPNGMMYKDRDGVVPT EITKVFNRKEHKGYMLAAQRNGEIIKEALHNP NLSVDEPLDVDYRF  
 DFSDEIKEKIKKLSAKSLNEMLFRAQRTEVAGMTAQINRKL LINSLYGALGNVWFRYD LRNATA  
 ITTFGQMALQWIERKVNEYLNEVCGTEGEAFVLYGDTDSIYVSADKIIDKVGESKFRD TNHWVDF  
 LDKFARERMEPAIDRGFREMCEYMNNKQHLMFMDREAIAGPPLGSKGIGGFWTGKKRYALNVWDM  
 EGTRYAEPKLIKIMGLETQKSSTPKAVQKALKECIRRM LQEGEESLQEYFKEFEKEFRQLNYISIA  
 SVSSANNIAKYDVGGFPKPCPFHIRGILTYNRAIKGNIDAPQVVEG EKVYVLP LREGNPF GDKC  
 IAWPSGTEITDLIKDDVLHWM DYTVLLEKTFIKPLEGFTSAAKLDYEKKASL FDMFDF

>2AXLA

MDDSEDTSWDFGPQAFKLLSAVDILGEKFGIGLPILFLRGSNSQRLADQYRRHSLFGTGKDQTES  
 WWKAFSRQLITEGFLVEVSRYNKFMKICALTKKGRNWLHKANTESQSLILQANEELCPKLLLLPS  
 SKTVSSGTKEHCYN

>2AY0A

MGTTTGMVMLDDATRERIKSAATRDRTPHWLIKQAI FSYLEQLENSDTLPEHHHHHH

>2AY0B

MGTTTGMVMLDDATRERIKSAATRDRTPHWLIKQAI FSYLEQLENSDTLPEHHHHHH

>2AY0C

MGTTTGMVMLDDATRERIKSAATRDRTPHWLIKQAI FSYLEQLENSDTLPEHHHHHH

>2B0LC

GSSHHHHHMSKAVVQMAISSLSYSELEAIEHIFEELD GNEGLLVASKIADRVGITRSVIVNALR  
 KLESAGVIESRSLGMKGTYIKVLNNKFLIELENL KSH

>2BA3B

SDSAVRKKSEVRQKTVVRTLRFS PVEDETIRKKAEDSGLTVSAYIRNAALN

>2BDEA

MDTHKVFVNRIINMRKIKLIGLMDHTLIRYNSKNFESLVYDLVKERLAESFHYP EEEKFKFNF  
 DDAIRGLVIDSKNGNILKLSRYGAIRLSYHGTKQISFSDQKKIYRSIYVDLGD PNYMAIDTSFSI  
 AFCILYGQLVDLKDTPDKMPSYQAI AQDVQYCVDKVHSDGTLKNI I IKNLKKYVIREKEVVEGL  
 KHFIRYGGKIFILTNSEYSYSKLLLDYALSPFLDKGEHWQGLFEFVITLANKPRFFYDNL RFLSV  
 NPENGTMTNVHGPIVPGVYQGGNAKKFTEDLGVGGDEILYIGDHIYGDILRLK KDCNWR TALVVE  
 ELGEEIASQIRALPIEKKIGEAMA IKKELEQKYVDLCTRS IDESSQQYDQEIHDLQLQI STVDLQ  
 ISRLLQEQNSFYNPKWVERVFRAGAEESYFAYQVDRFACIYMEKLSDLLEHSPMTYFRANR RLLAH  
 DIDIAAALEHHHHHH

>2BNZA

MAKKDIMGDKTVRVRADLHHI IKIETAKNGGNVKEVMDQALEEYIRKYLDPKL

>2COBA

GSSGSSGRGRYRQYNSEILEEAISVMSGKMSVSKAQSIYGIPHSTLEYKVKERLGT LKNPPKKK  
MKLMR

>2CXYA

GSSGSSGEKITKVYELGNEPERKLWVDRYLTFMEERGSPVSSLPVGGKKPLDLFRLYVCVKEIGG  
LAQVKNKKNKWRRELATNLNVGTSSSAASSLKKQYIQYLFAFECKIERGEEPPPEVVFSTGDT

>2D7LA

GSSGSSGRPKTGFQMWLEENRSNILSDNPDFSDEADI IKEGMIRFRVLSTEERKVVWANKAKGETA  
SEGTEAKKRKSGPSSG

>2D8MA

GSSGSSGEP RRPRAGPEELGKILQGVVVVLSGFQNPFRSEL RDKALELGAKYRPDWTRDSTHLIC  
AFANTPKYSQVLGLGGRIVRKEWVLDCHRMRRLPSQRYLMAGPGSSSEEDEASHSGSGPSSG

>2D9HA

GSSGSSGLQCEICGFTCRQKASLNWHQRKHAETVAALRFPCEFCGKRFEKPDVAAHRKSHPAL  
LLAPQESSGPSSG

>2DA6A

GSSGSSGRNRFKWPASQQIILYQAYDRQKNPSKEEREALVEECNRAECLQRGVSPSKAHGLGSLN  
VTEVRVYNWFANRRKEEAFRQKLAMDAYSSNSGPSSG

>2DGZA

GSSGSSGSSQPVISAEQETQIVLYGKLVEARQKHANKMDVPPAILATNKILVDMAKMRPTTVEN  
VKRIDGVSEGKAAMLAPLWEVIKHFCQTNSVQTDLFSSTKPQSGPSSG

>2DIGA

GSSGSSGMP SRKFADGEVVRGRWPGSSLYEVEILSHDSTS QLYTVKYKDGTELEL KENDIKSGP  
SSG

>2DINA

GSSGSSGKKTEWSREEEKLLHLAKLMPTQWR TI API IGR TAAQC LEHYEFLLDKAAQRDSGPSS  
G

>2DMPA

GSSGSSGAYPDFAPQKFKEKTQGQVKILEDSFLKSSFP TQAE LDRLRVETKLSRREIDSWFSERR  
KLRDSMEQAVLDSMSGSGKSGPSSG

>2DMQA

GSSGSSGKRMRTSFKHHQLRTMKSYFAINHNPDAKDLKQLAQKTGLTKRVLQVWFQ NARAKFRN  
LLRQENGGVSGPSSG

>2DPDB

MKEEKRSSTGFLVKQRAFLKLYMI TMTEQERLYGLKLEVL RSEFKEIGFKPNHTEVYRSLHELL  
DDGILKQIKVKKEGAKLQEVVLYQFKDYEA AKLYKKQLKVELDRSKK LIEKALS DN F

>2DQBA

MRF SREALLEASRLAPYAQKARDTRGRAHPEPESLYRTPYQKDRDRILHTTAFRRLEYKTQVL  
PGWAGDYRTRLTHTLEVAQVSR SIARALGLNEDL TEAIALSHDLGHPPFGHTGEHVLN ALMQDH  
GGFEHNAQALRILTHLEVRYPGFRGLNLT YEVL EGIATHEAAYS PGFKPLYEGQGTLEAQVVDLS  
DAIAYAAHDLDDGFRAGLLHPEELKEVELLQALALEEGLDLLRPELDRRVLVRQLLGYFITAAI  
EATHRRVEEAGVQSAEAVRRHPSRLAALGEEAEKALKALKAFLMERFYRHPEVLRERRKAEAVLE



GLFAAYTRYPELLPREVQAKIPEEGLERAVCDYIAGMTDRFALEAYRRLSP  
 >2E5RA  
 GSSGSSGVFHPVECSYCHSESMGFRYRCQQCHNYQLCQDCFWRGHAGGSHSNQHQMKEYTSW  
 >2E6RA  
 GSSGSSGHSSAQFIDSYICQVCSRGEDEDDKLLFCDCDDNYHIFCLLPPLPEIPRGIWRCPKCIL  
 AECKQPPEAFGFQEATQEYSLSGPSSG  
 >2EBIA  
 KKRAETWVQDETRSLIMFRRGMDGLFNNTSKSNKHLWEQISSKMREKGFDRSPDMCTDKWRNLLKE  
 FKKAKHHDRGNNGSAKMSYYKE  
 >2ELHA  
 GSSGSSGMNIRMGTGKRPLRSLTPRDKIHAIQRIHDGESKASVARDIGVPESTLRGWCKNEDKL  
 RFMSRQSATDNLCADALGDKMD  
 >2E00B  
 MYIVNSNKSRSVVERYIVSRLRDKGFAVIRAPASGSKRKDHVPDI IALKSGV I I LIEVKS RKN G  
 QKIYIEKEQAEGIREFAKRS GGELFLGVKLPKMLRFIKFDMLRQTEGGNYAIDLETVEKGMELED  
 LVRYVESKISR TLDSFL  
 >2EWTA  
 MSSEYAKQLGAKLRAIRTQQGLSLHGVEEKSQGRWKAVVVGSYERGDRAVTVQRLAELADFYGVP  
 VQELLP  
 >2F2EB  
 MVKRTSHKQASCPVARPLDVIGDWSMLIVRDAFEGLTRFGEFQKSLGLAKNILAARLRNLVEHG  
 VMVAVPAESGSHQEYRLTDKGRALFPLLVAIRQWGEDYFFAPDESHVRLVERDSGQVPVRLQVRA  
 GDGSPLAAEDTRVSRD  
 >2F7NA  
 MTKKSTKSEAASKTKKSGVPETGAQGVRAGGADHADAHLGTVNNALVNHHYLEEKEFQTVAETL  
 QRNLATTISLYLKFKKYHWDIRGRFFRDLHLAYDEFIAEIFPSIDEQAERLVALGGSPLAAPADL  
 ARYSTVQVPQETVRDARTQVADLVQDL SRVGKGYRDDSQACDEANDPVTADMYNGYAATIDKIRW  
 MLQAIMDDERLD  
 >2FC7A  
 GSSGSSGQQMQAESGFVQHVGFKCDNCGIEPIQGVWRHCQDCPPEMSLDFCDSCSDCLHETDIHK  
 EDHQLEPIYRSSGPSSG  
 >2FE3B  
 MAAHELKEALET LKETGVRITPQRHAILEYLVNSMAHPTADDIYKALEGKFPNMSVATVYNNLRV  
 FRESGLVKELTYGDASSRFDVFTSDHYHAICENCGKIVDFHY PGLDEVEQLAAHVTFGKVS HRL  
 EIYGVCQECSK KENH  
 >2FMYA  
 ATQMRLTDTNLLLEVLNSEEYSGLKEFREQRYSK KAILYTPNTERNLVFLVKSGRVRVYLAYEDK  
 EFTLAILEAGDIFCTHTRAFIQAMEDTTILYTDIRNFQNI VVEFPAPFSLNMVKVLGDLLKNSLTI  
 INGLVFKDARLRLAEFLVQAAMDTGLKVPQGIKLELGLNTEEIALMLGTTRQTVSVLLNDFKKMG  
 ILERVNQRTLLKDLQKLKEFSSGV  
 >2FPHX  
 GIYQHFSIEDRPFLDKGMEWIKKVEDSYAPFLTPFINPHQEKLKILAKTYGLACSSSGEFVSSE  
 YVRVLLYPDYFQPEFSDFEISLQEIVYSNKFEYLTHAKILGTVINQLGIERKLFGDILVDEERAQ  
 IMINQQFLLLQDGLKKIGRIPVSL EERPFT EKID

>2FU4B

MTDNNTALKKAGLKVTLPRLKILEVLQEPDNHHVSAEDLYKRLIDMGEEIGLATVYRVLNQFDDA  
GIVTRHNFEGGKSVFELT

>2FWRA

MGSSHHHHHSSGLVPRGSHMQMIAEIIYERGTIVVKGDAHVPKAFDSRSGTYRALAFRYRDI I  
EYFESNGIEFVDNAADPIPTPYFDAEISLRDYQEKALERWLVDKRGCIVLPTGSGKTHVMAAAN  
ELSTPTLIVVPTLALAEQWKERLGI FGEEYVGEFSGRIKELKPLTVSTYDSAYVNAEKLGNRFML  
LIFDEVHHLPAESYVQIAQMSIAPFRLGLTATFEREDGRHEILKEVVGKVFELFPDSLAKHHLA  
KYTIKRIFVPLAEDERVEYEKREKVYKQFLRARGITLRRRAEDFNKIVMASGYDERAYEALRAWEE  
ARRIAFNSKNKIRKLRREILERHRKDKIIIFTRHNELVYRISKVFLIPAITHRTSREEREEILEGF  
RTGRFRAIVSSQVLDEGIDVPDANVGVIMSGSGSAREYIQRLGRILRPSKGKKEAVLYELISRG  
GEVNTARRRKNAAKGAA

>2G9WB

MAKLTRLGDLERAVMDHLWSRTEPQTVRQVHEALSARRDLAYTTVMVAVLQRLAKKNLVLQIRDDR  
AHRYAPVHGRDELVAGLMVDALAQAE DSGSRQAALVHFVERVGADEADALRRALAELEAGHGNRP  
PAGAA TET

>2GFUA

KAKNLNGGLRRSVAPAAPTSSDFSPGDLVWAKMEGYPPWPSLVYNHPFDGTFIREKGSVRVHVQ  
FFDDSPTRGWVSKRLLKPYTGSKSKEAQKGGHFYSAKPEILRAMQRADEALNKDKIKRLELAVSD  
EPSE

>2GMGA

AHHHHHHSATRREKII ELLLEGDYSPSELARILDMRGKGSKKVILEDLKVISKIAKREGMVLLI  
KPAQCRKCGFVFKAEINIPSRCPKCKSEWIEEPRFKLERK

>2H6BB

MSVEGLGKDFCGAII PDNFFPIEKLRNYTQMGLIRDFAKGSAVIMPGEIITSMIFLVEGKIKLDI  
IFEDGSEKLLYYAGGNLIGKLYPTGNNIYATAMEPTRTCWFSEKSLRTVFRTEDEDMIFEIFKNY  
LTKVAYYARQVAEMNTYNPTIRILRLFYELCSSQKRVGDTYEITMPLSQKSIGEITGVHHTVVS  
RVLACLKRENILDKKNKIIVYNL GELKHLSEQTSYSDPNSSSVDKLAAALDHH

>2H9UA

MACEGAPEVRIGRKPVMNYVLAAILTTLM EQGTNQVVVKARGRNINRAVD AVEIVRKRFAKNIEIK  
DIKIDSQEIEVQTPEGQTRTRRVSSIEICLEKAGESA

>2HGVA

GSSHHHHHMMALLQKTRI INSM LQAAAGKPVNFKEMAETLRDVIDSNIFVVSRRGKLLGYSINQQ  
IENDRMKMLEDRQFP E EYTKNLFNVPETSSNLDINSEYTAFPVENRDLFQAGLTTIVPIIGGGE  
RLGTLILSRLQDQFNDDDLILA EYGATVVGMEIL

>2HKVA

GMTDWQQALDRHVG VGVRTTRDLIRLIQPEDWDKRPI SGKRSVYEVAVHLAVLLEADLRIATGAT  
ADEMAQFYAVPVLPEQLVDRLDQSWQYYQDRLMADFSTETTYWGVT DSTTGWLL EAAVHLYHHS  
QLLDYLNLLGYDIKLDLFE

>2HQLF

GGGGGMLNRFLEGEIESSCWSVKKTGFLVTIKQMRFFGERLFTDYYVIYANGQLAYELEKHTK  
KYKTISIEGILR TYLERKSEIWKT TIEIVKIFNPKNEIVIDYKEI

>2HUEA

PLGSPNSSIVSLLGIKVLNPAKFTDPYEF EITFECL ESLKHDLEWKLT YVGSRSRLDHDQELDS

ILVGPVPGVGNKFVFSADPPSAELIPASELVSVTVILLSCSYDGREFVRVGYVNNNEYDEEELRE  
NPPAKVQVDHIVRNILAEKPRVTRFNIVWDNENEGDLYPPEQPGV

>2I13B

ISEFGSSSSVAQAALPEGKPYACPECGKSFSDHLAEHQRTHTGEKPYKCPECGKSFSDKKDL  
TRHQRTHTGEKPYKCPECGKSFQRANLRAHQRTHTGEKPYACPECGKSFSQLAHLRAHQRTHTG  
EKPYKCPECGKSFREDNLHHTHQRTHTGEKPYKCPECGKSFRRDALNVHQRTHTGKKTS

>2IJGX

MNDHIHRVPALTEEEIDSVAIKTFERYALPSSSSVKRKGKGVITLWFRNDRVLDNDALYKAWSS  
SDTILPVYCLDPRLFHTTHFFNFPKTGALRGGFLMECLVDLRKNLMKRGLNLLIRSGKPEEILPS  
LAKDFGARTVFAHKETCSEEVDDVERLVNQGLKRVGNSTKLELIWGSTMVYHKDDLDFDVFDPDVFY  
TQFRKSVEAKCSIRSSTRIPLSLGPTPSVDDWGDVPTLEKLGVEPQEVTRGMRVFGGESAGVGRV  
FEYFWKKDLLKVYKETRNGMLGPDYSTKFSPLAFGCISPRFIYEEVQRYEKERVANNSTYWVLF  
ELIWRDYFRFLSIKCGNSLFLHGGPRNVQGWKSDQKLFESWRDAKTGYPLIDANMKEKELSTTGFM  
SNRGRQIVCSFLVRDMGLDWRMGAEFWETCLLDYDPCSNYGNWYTGAGVGNDRPREDRYFSIPKQA  
QNYDPEGEYVAFWLQQLRRLPKKRHWPGRLMYMDTVVPLKHGNGPMAGGSKSGGGFRGSHSGRR  
SRHNGP

>2INGX

GPRMSMVVSGLTPEEFMLVYKFARKHHITLNLITEETHVMKTDAEFVCERTLKYFLGIAGGK  
WVVSYFWVTQSIKERKMLNEHDFEVRGDVVNGRNHQGPKRARESQRKIFRGLEICCYGPFTNKP  
TDQLEWMVQLCGASVVKELSSFTLGTGVHPVVVQPDATEDNGFHAIGQMCEAPVVTREWVLDS  
VALYQCQELDTYLIPQIP

>2IO4B

MMKAKVIDAVSFSYILRTVGDFLSEANFIVTKEGIRVSGIDPSRVVFLDIFLPSYFEGFEVSQE  
KEIIGFKLEDVNDILKRVLKDDTLILSSNESKLTFTDGEFTRSFELPLIQVESTQPPSVNLEFP  
FKAQLLTITFADIIDELSDLGEVLNIHSENKLYFEVIGDLSTAKVELSTDNGTLLLEASGADVSS  
SYGMEYVANTTKMRRASDSMELYFGSQIPLKLRFKLPQEGYGFYIAPRAD

>2IO4A

MVKIVYPNAKDFFSFINSITNVTDSEIILNFTEDGIFSRHLEDKVLMAIMRIPKDVLEYSIDSP  
TSVKLDVSSVKKILSKASSKATIELTETDGLKIIIRDEKSGAKSTIYIKAEKQVEQLTEPKV  
NLAVNFTTDESVLNVIAADVTLVGEEMRISTEEDKIKIEAGEEGKRYVAFLMKDKPLKELSIDTS  
ASSSYSAEFMKDAVKGLRGFSAPTMVSFGENLPMKIDVEAVSGGHMIFWIAPRL

>2JD3B

MDDERKRKYTYLHLPEKAADFQTLAIESVPRSERGELFRNAFISGMALHQLDPRLPVLLTAIL  
SEEF SADQVVTLLSQTGWKPSQADIRAVLTEL GASQSVEKMPPSATDSVQEAMNDVRLKMKKLF

>2JMPA

MGGGGGMEQFNAFKSLKHYEKTIGFHDKYIKDINRFVFKNNVLLILLENEFARNSLNDNSEI  
IHLAESLYEGIKSVNFVNEQDFFFNLAKEENSRDTLYQNSG

>2JPCA

LRERQVLKLI DEGYTNHGI SEKLHISIKTVETHRMNMRKLVHVKVTELLNCARRMRLIEY

>2JR1A

FNVKQKSEITALVKEVTPPRKAPSKAKREAPIKYWLP HSGATWSGRGKIPKPF EAWIGTAAYTAW  
KAKHPDEKFPAPFG

>2JTMA

MSSGKKPVKVT PAGKEAELVPEKVWALAPKGRKGVKIGLFDKDPETGKYFRHKL PDDYPI

>2JULA

MQRTKEAVKASDGNLLGDPGRIPLSKRESIKWQRPRFTRQALMRCCLIKWILSSAAPQGSDDSSDS  
ELELSTVRHQPEGLDQLQAQTKFTKELQSLYRGFKNECPTGLVDEDTFKLIYSQFFPQGDATTY  
AHFLFNADFADGNGAIFHFDVVGLSILLRGTVHEKWKWAFNLYDINKDGCITKEEMLAIMKSIY  
DMMGRHTYPILREDAPLEHVERFFQKMDRNQDGVVTIDEFLETCQKDENIMNSMQLFENVI

>2JX3A

FTIAQGGKQKLCEIERIHFFLSKKKTDELRLNLKLLYNRPQTVSSLKKNVGFSGFPFEKGSVQY  
KKKEEMLKKFRNAMLKSICEVLDLERSGVNSELVKRILNFLMHPKPSGKPLPKSKKTCCKGSKKE  
R

>2K4BA

MSYHHHHHHHDYDIPTTENLYFQGAMNEVEFVNSNAELIVMRVIWSLGEARVDEIYAQIPQELEW  
SLATVKTLLGRLVKKEMLSTEKEGRKFVYRPLME

>2K5VA

MNYKISELMPNLSGTINAEVVAAYPKKEFSRKDGTGKQLKSLFLKDDTGSIRGTLWNEADFEVK  
KGDIAEVSGYVKQGYSGLEISVDNIGIIEKSLEHHHHHH

>2K6GA

KRTNYQAYRSYLNREGPKALGSKEIPKGAENCLEGLIFVITGVLESIERDEAKSLIERYGGKVTG  
NVSKKTNYLVMGRDSGQSKSDKAAALGTKIIDEDGLLNLIRNLE

>2K75A

SDLVKIRDVSLSTPYVSVIGKITGIIHKEYESDGTTKSVYQGYIEDDTARIRISSFGKQLQDSDV  
VRIDNARVAQFNGYLSLSVGDSSRIESVNVNIPLEHHHHHH

>2K86A

GSSSRRAWGNLSYADLITRAIESSPKRLTLSQIYEWVRCVPYFKDKGDSNSSAGWKNSIRHN  
LSLHSRFRMVQNEGTEGKSSWWIINPDGGKSGKAPRRRA

>2K9IB

GRPYKLLNGIKLGVYIPQEWHDRLMEIAKEKNLTLSDVCRLAIKEYLDNHDKQKK

>2K9NA

KVKFTEEEDLKLQQLVMRYGAKDWIRISQLMITRNPQRQCRERWNNYINPALRTDPWSPPEEDMLLD  
QKYAEYGPKNKISKFLKNRSDNNIRNRWMMIARHRAKHQS

>2KEBA

MGSSHHHHHHGSSLEVLFGPGSMSASAQQLAEELOIFGLDCEEALIEKLVELCVQYGQNEEGMV  
GELIAFCTSTHKVGLTSEILNSFEHEFLSKRLSKAR

>2KHQA

MITFADYFYQWYEVNKLPHVSESTKRHYESAYKHIKDHFRHKLLKDIKRTEYQKFLNEYGLTHSY  
ETIRKLSYIRNAFDDAIHEGYVIKNPTYKAELHASVLEHHHHHH

>2KI2A

MRNIYVGNLVYSATSEQVKELFSQFGKVFNVKLIYDRETKPKGFGFVEMQEEVSEAIKLDNT  
DFMGRITRVTEANPKKSLEHHHHHH

>2KIWA

TFKQVADDWLKQYANDVKVSSVRAREKAIQHAIERFNTKPIQTIKKHDYQRFVDDISAQYSKNYV  
DSIVASTNMIFKYAYDTRLIKAMPSEGIKRPKKKVSVELEHHHHHH

>2KJ8A

SSNNNSFSAIYKEWYEHKKQVWSVGYATELAKMFDDDIPLPIIGGLEIQDIEPMQLLEVIRRFEDR  
GAMERANKARRRCGEVFRYAIVTGRAKYNPAPDLADAMKGYRKNLEHHHHHH

>2KKOB  
MAGQSDRKAALLDQVARVGGKALANGRRLQILDLLAQGERAVEAIATATGMNLTASANLQALKSG  
GLVEARREGTRQYYRIAGEDVARLFLVQVVADEHLEHHHHHH

>2KKPA  
MIEPSKITVEQWLNRLWLDYAKPHLRQSTWESYETVLRRLHVIPTLGSIPLKKLQPADIQRLYASK  
LESGLSPTRVRYIHVVLEAMSQARESGLLLQNPTEAAKPPRHPLEHHHHHH

>2KKVA  
MENSGAYTFETIAREWHESNKRWSEDHRSRVLRYLELYIFPHIGSSDIRQLKTSHELLAPIKEVDT  
SGKHDVAQRLQQRVTAIMRYAVQNDYIDSNPASDMAGALSTTKARHYPLEHHHHHH

>2KNGA  
SGSGRGRGAIDREQSAAIREWARRNGHNVSTRGRIPADVIDAYHAATLEHHHHHH

>2KW3C  
GHGTGSFGDRPARPTLLEQVLNQQKRLSLLRSPEVVQFLQKQQQLLNQQVLEQRQQQFPGTSM

>2KW3B  
GAGEPTLLQRLRGTISKAVQNKVEGILQDVQKFSNDKLYLYLQLPSGPTTGDKSSEPSTLSNE  
EYM

>2KWQA  
GPMGMSIREQSCRVTCKTCKYTHFKPKETCVSENHDFHWHNGVKRFFKCPCGNRTISLDRLPK  
KHCSTCGLFKWERVGMLEKKTGPKLGG

>2L1PA  
MGHHHHHSHMLPPEQWSHTTVRNALKDLLKDMNQSSLAKECPLSQSMISSIVNSTYYANVSAAK  
CQEFGRWYKHFKTKDMM

>2L3NA  
SVSILRSSVNHREVDEAIDNILRYTNSTEQQFLEAMESTGGRVRIAIKLLSKQTSGGSGGSKLG  
GSGGSRKDL SVKGMLYDSDSQILNRLRERVSGSTAQSA

>2L49B  
MSNTISEKIVLMRKSEYLSRQQADLTGVPYGTLSYYESGRSTPPTDVMNLIQTPQFTKYTLWF  
MTNQIAPESGQIAPALAHFGQNETTSPHSGQKTG

>2L92A  
MSTVPKYRDPATGKTWSGRGRQPAWLGNDPAAFLIQPDLPAILEHHHHHH

>2L93A  
AARPAKYSYVDENGETKTWTGQGRTPAVIKKAMEEQGKQLEDFLIKELEHHHHHH

>2LFHB  
MGHHHHHSHMGGGKGPAAEPLSLLDDMNHCYSRLRELVPGVPRGTQLSQVEILQRVIDYILD  
QVV

>2LJ6A  
MPSSKPLAEYARKRDFRQTPEPSGRKPRKDSTGLLRYCVQKHASRLHYDFRLELDGTLKSWAVP  
KGPCLDPAVKRLAVQVEDHPLDYADFEGSIPQGHYAGDVIWDRGAWTPLDDPREGLEKGHLSF  
ALDGEKLSGRWHLIRTNLRGKQSQWFLVKAKDGEARSLDRFDVLKER

>2LLHA  
GSHMQESFKKQEKTPKTPKGPSSVEDIKAKMQASIEKGGSLPKVEAKFINYVKNCFRMTDQEAIQ  
DLWQWRKSL

>2LSSA  
MATNIVGKVKWYNSTKNFGFIEQDNGGKDVVHKS AVDAAGLHSLEEGQDVIFDLEEKQKAYAV

NLRIK  
 >2LTTB  
 MADKLFEEIEELIVLSENAKGWRKELNRVSWNDAEPKYDIRTWS PDHEKMGKGITLSEEEFGVL  
 LKELGNKLEHHHHHH  
 >2LUAA  
 SPPKPKCRCGISGSSNTLTTCRNSRCPCYKSYNSCAGCHCVGCKNPHKEDYV  
 >2LUYA  
 HMGKNDNDALIMCRRCRKVKGIDSYSKTQWSKTFTFVRGRTVSVSDPKVICRTCQPKQHDSIWCT  
 ACQQTGKINEFSKAQRHVLDPRCQICVHSQRN  
 >2LW1A  
 GSHMKAETVKRSSSKLSYKLORELEQLPQLLEDLEAKLEALQTQVADASFFSQPHEQTQKVLADM  
 AAAEQELEQA FERWEYLEALKNNG  
 >2LYJB  
 MIINNKLIREKKKISQSELAALLEVSRQTINGIEKNKYNPSLQLALKIAYYLNTPLEDIFQWQP  
 E  
 >2M14A  
 PSHSGAAIFEKVSIIA INEDVSPAELTWRSTDGDKVHTTVLSTIDKLQATPASSEKMMLRLIGK  
 VDESKKRKDNEGNEVVPKQRHMFSFNNRTVMDNIKMTLQQIISRYKDADGNSS  
 >2M8EA  
 ASMGKSKEISQDLRKKIVDLHKSGSSLGAISKRLKVPRSSVQTIVRKYKHHGTTQHH  
 >2MA1A  
 HDAPLFEALRAWRLQKAKELSLPPYTI FHDATLKTIAELRPGSHATLGTVSGVGRKLAAYGDEV  
 LQVVRDSSGG  
 >2MAMA  
 ADEPAYLTVGTDVSAKYRGAFCEAKIKTVKRLVKVLLKQDNTTQLVQDDQVKGPLRVGAIVET  
 RTSDGSFQEAIISKLT DASWYTVVFDGDERTLRRTSLCLKGERHFAESETLD  
 >2MH3B  
 MKPKTASEHRKSSKPI MEKRRRARINESLSQLKTLILDALKKSSRHSKLEKADILEMTVKHLRN  
 LQRAQ  
 >2NMUA  
 MAGDPNSMTVSHHNASTARFYALRLLPGQEVFSQLHAFVQQNQLRAAWIAGCTGSLTDVALRYAG  
 QEATTSLTGT FEVISLNGTLELTGEHLHLAVSDPYGVMLGGHMMPGCTVRTTLELVIGELPALTF  
 SRQPCAISGYDELHISSRLEHHHHHH  
 >2NOGB  
 MVSEPKVPKAPRPPKQPNVQDFQFFPRLFELLEKEILYYRKTIGYKVPRNPDLPNSAQVQKEEQ  
 LKIDEAEPLNDEELEKEKLLTQGF TNWKRDFNQFIKANEKWGRDDIENIAREVEGKTPEEVIE  
 YSAVFWERCNELQDIEKTMAQIERGEARIQRRI SILEHHHHHH  
 >2NP2B  
 MSFSRRPKVTKSDIVDQIALNIKNNL KLEKKYIRLVIDAFFEELKSNLCSNNVIEFRSFGTFEV  
 RKRKGRNLARNPQTGEYVKVLDH HVAYFRPGKDLKERVWGIK  
 >2O3CC  
 GSHMEAPILYEDPPEKLT SKDGRAANMKITSWNV DGLRAWVKKNGLDWVRKEDPDILCLQETKCA  
 EKALPADITAMPEYPHKY WAGSEDKEGYSVAMLCKTEPLNVTY GIGKEEHDKEGRVITAEFPDF  
 FLVTAYVPNASRGLVRLDYRKTWDVDFRAYLCGLDARKPLVLCGDLNVAHQEIDLK NPKGNRKNA

GFTPEEREGFTQLLEAGFTDSFRELYPDQAYAYTFWTYMMNARSKNVGWRLDYFVLSSALLPGLC  
 DSKIRNTAMGSDHCPITLFLAV

>208BB

MGSAPQNSESQAHVSGGGDDSSRPTVWYHETLEWLKEEKRRDEHRRRPDHPDFDASTLYVPEDFL  
 NSCTPGMRKWWQIKSQNFDLVICYKVGKFYELYHMDALIGVSELGLVFMKGNWAHSGFPEIAFGR  
 YSDSLVQKGYKVARVEQTETPEMMEARCRKMAHISKYDRVVRREICRIITKGTQYTSVLEGPSE  
 NYSKYLLSLKEKEEDSSGHTRAYGVCFVDTSLGKFFIGQFSDDRHC SRFRTLVAHYPPVQVLFEK  
 GNLSKETKTILKSSLSLQEGLI PGSQFWDASKTLRLLLEEEYFREKLSDGIGVMLPQVLKGMT  
 SESDSIGLTPGEKSELALSALGGCVFYLLKCLIDQELLSMANFEEYIPLDSDTVSTTRSGAIFTK  
 AYQRMVLDAVTLNLEIFLNGTNGSTEGTLLERVDTCHTTPFGKRLKQWLCAPLCNHYAINDRLD  
 AIEDLMVVPDKISEVVELLKLPDLERLLSKIHNVSPLKSQNHPSRAIMYEETTYSKKIIDF  
 LSALEGFKVMCKIIGIMEEVADGFKSKILKQVIVSLQTKNPEGRFPDLTVELNRWDTAFDHEKARK  
 TGLITPKAGFSDYDQALADIRENEQSLEYLEKQRNRIGCRTIVYWGIGRNYQLEIPENFTTR  
 NLPEEYELKSTKKGCKRYWTKTIEKKLANLINAEEERDVSLKDCMRRLFYNFDKNYKDWQSAVEC  
 IAVLDVLLCLANYSRGGDGPMPVILLPEDTPPFLELKGSRHPCITKTFFGDDFI PNDILIGCE  
 EEEQENGKAYCVLVTGPNMGGKSTLMRQAGLLAVMAQMGCVPAEVCRLTPI DRVFTRLGASDRI  
 MSGESTFFVELSETASILMHATAHSLVLVDELGRGTATFDGTAIANAVVKELAETIKCRTLFSTH  
 YHSLVEDYSQNVAVRLGHMACMVENECEDPSQETITFLYKFIKGACPKSYGFNAARLANLPEEVI  
 QKGRKAREFEKMNQSLRLFREVCLASERSTVDAEAVHKLLTLIKEL

>208BA

MAVQPKETLQLESAAEVGFVRRFFQGMPEKPTTTVRLFDRGDFYTAHGEDALLAAREVFKTQGVIK  
 YMGPAKANLQSVVLSKMNFESEFVKDLLLVRQYRVEVYKNRAGNKASKENDWYLAYKASPGNLSQ  
 FEDILFGNNDMSASIGVVGKMSAVDQQRQVGVGYVDSIQRKLGLCEFPDNDQFSNLEALLIQIG  
 PKECVLPGETAGDMGKLRQIIQRGGILITERKKADFSTKDIYQDLNRLKGGKGEQMNSAVLPE  
 MENQVAVSSLSAVIKFLELLSDDSNFGQFELTTFDFSQYMKLDIAAVRALNLFQGSVEDTTGSQS  
 LAALLNKCKTPQGQRLVNQWIKQPLMDKNRIEERLNLVEAFVEDAELRQTLQEDLLRRFPDLNRL  
 AKKFQORQAANLQDCYRLYQGINQLPNVIALEKHEGKHQKLLLAVFVTPLTDLRSDFSKFQEMIE  
 TTLDMQVENHEFLVKPSFDPNLSELREIMNDLEKKMQSTLISAARDLGLDPGKQIKLDSSAQFG  
 YYFRVTCKEEKVLRNNKNFSTVDIQKNGVKFTNSKLTSLNEEYTKNKTEYEEAQDAIVKEIVNIS  
 SGYVEPMQTLNDVLAQLDAVVSFHVSNGAPVPYRPAILEKGQGRIILKASRHACVEVQDEIAF  
 IPNDVYFEKDKQMFHIITGPNMGGKSTYIRQTGVIVLMAQIGCFVPCESAEVSI VDCILARVGAG  
 DSQKGVSTFMAEMLETASILRSATKDSLIIIDELGRGTSTYDGFGLAWAISEYIATKIGAFCMF  
 ATHFHELTALANQIPTVNNLHVLTALTTEETLTMLYQVKKGVCDQSFGIHVLAELANFPKHVIECAK  
 QKALELEEFQYIGESQGYDIMEPAAKKCYLEREQGEKIQEFLSKVKQMPFTEMSEENITIKLKQ  
 LKAEVIAKNNSFVNEIISRIKVT

>2099A

GHMSRNLLAIVHPILRNLMEESGETVNMVAVLDQSDHEAIIIDQVQCTHLMRMSAPIGGKLPMHAS  
 GAGKAFLAQLSEEQVTKLLHRKGLHAYTHATLVSPVHLKEDLAQTRKRGYSFDEEHALGLRCLA  
 ACIFDEHREPFAAISISGPI SRITDDRVT EFGAMVIKAAKEVTLAYGGMRGS

>20BPB

GMSDPGNEQNGDIDPAIVEVLLVLREAGIENGATPWSLPKIAKRAQLPMSVLRRLVLTQLQAAGL  
 ADVSVEADGRGHASLTQEGAALAAQLFPDPF

>20CJD

SSSVPSQKTYQGSYGFRLGFLHSGTAKSVTCTYSPALNKMFCQLAKTQCPVQLWVDSTPPPGRVR

AMAIYKQSQHMTVEVRRCPHHERCSDSDGLAPPQHILIRVEGNLRVEYLDDRNTFRHSVVPYEPPEVGS  
 DCTTIHYNMCMNSSCMGGMNRRPILTIITLEDSSGNLLGRNSFEVRCACPRDRRTEENLRKKGE  
 PHHELPPGSTKRALPNNT

>2OD5A

GMTGAVETESMKTVRIREKIKKFLGDRPRNTAEILEHINSTMRHGTTSSQQLGNVLSKDKDIVKVG  
 YIKRSGILSGGYDICEWATRNVVAEHCPEWTEGQPIILNEEGDFTLGPLPE

>2OKFA

GMSARDVFHEVVKTALKKDGWQITDDPLTISVGGVNLSIDLAAQKLI AERQGQKI AVEVKSFLK  
 QSSAISEFHTALGQFINYRGALRKVEPDRVLYLAVPLTTYKTFQLDPFKEII IENQVKMLVYDV  
 EQEVI FQWIN

>2OWYB

MWFRNLLVYRLTQDLQLDADSLEKALGEKSARPCASQELTTYGFTAPFGKGPDAPLVHVSQDFFL  
 ISARKEERILPGSVVRDALKEKVDIEAQQMRKVYKKERDQLKDEIVQTLLPRAFI RRSSTFAAI  
 APSLGLIILVDSASAKKAEDLLSTLREALGSLPVRPLSVKVAPTATLTDWVKTQEAAGDFHVLDEC  
 ELRDTHEDGGVVRCKRQDLTSEEIQLHLTAGKLV TQLSLAWSDKLSFVLDDKLAVKRLRFEDLLQ  
 EQAEKDGGEDALGQLDASFTLMMLTFAEFLPALFEALGGEEIPQGV

>2OZ9R

AQQSPYSAAMAEQRHQEWLRFVDLLKNAYQNDLHLP LLNMLTPDEREALGTRVRIVEELLRGEM  
 SQRELKNELGAGIATITRGSNSLKAAPVELRQWLEEVLLKSD

>2OZEA

MIQYYTKKEWGVMEKEELKILEELRRILSNKNEAIVILNNYFKGGV GSKLSTMFAYLTDKLN  
 LKVL MIDKDLQATLTKDLAKTFKVELPRVNFYEGLKNGNLASSIVHLTDNLDLIPGTFDLMLLPK  
 LTRSWTFENESRLLATLLAPLKS DYDLIIIDTVPTPSVYTNNAI VASDYVMIPLQAEESTNNIQ  
 NYISYLI DLQEQFNPLDMIGFVPYLVDTDSATIKSNLEELYKQHKEDNLV FQNI IKRSNKVSTW  
 SKNGITEHKGYDKKVL SMYKNVFFEMLERIIQLENEKE

>2P2UB

SLSRRKPNPVIVADIRQAEGALAEIATIDRKVGEIEAQMNEAIDA AKARASQKSAPLLARRKELE  
 DGVATFATLNKTEMFKDRKSLDLGFGTIGFRLSTQIVQMSKITKDMTLERLRQFGISEGIRIKED  
 VNKEAMQGWPPERLEMVGLKRRTTDAFYIEINREEVADTAA

>2P5KA

MNKGQRHIKIREIITSNEIETQDELVDMLKQDGYKVTQATVSRDIKELHLVKVPTNNGSYKYSL

>2P5MC

MQRFNPLSKLKRALMDAFVKIDSASHMIVLKTMPGNAQAIGALMDNLDWDEMGTICGDDTILII  
 CRTPEDTEGVKNRLELL

>2P6RA

MKVEELAESSISSYAVGILKEEGIEELFPPQAEAVEKVFSGKNLLLAMP TAAGKTLLAEMAMVREA  
 IKGGKSLYVPLRALAGEKEYESFKKWEKIGLRIGISTGDYESRDEHLGDCDIIVTTSEKADSLIR  
 NRASWIKAVSCLVVD EIHLLDSEKRGATLEILVTMRRMNKALRVIGLSATAPNVTEIAEWL DAD  
 YVSDWRPVPLVEGVLCEGTLELFDGAFSTSRVKFEELVEECVAENGGVLVFESTRRGA EKTAV  
 KLSAITAKYVENEGLEKAI LEENEGEMSRKLAECVRKGA AFHHAGLLNGQRRVEDAFRRGNIKV  
 VVATPTLAAGVNL PARRVIVRSLYRFDGYSKRIK VSEYKQ MAGRAGRPGM DERGEAIIIVGKRDR  
 EIAVKRYIFGEPERITSKLGVETHLRFHLSII CDGYAKTLEEELEDFADTFFFKQNEISLSYEL  
 ERVVRQLENWGMVVEAAHLAPT KGLSLSVRLYIDPLTGFIFHDVLSRMELSDIGALHLICRTPDM  
 ERLTVRKTDSWVEEAFRLRKELSYPSDFSVEYDWF LSEVKTALCLKDWIEEKDEDEICAKYGI



APGDLRRIVETAEWLSNAMNRIAEVGNSTSVSGLTERIKHGVKEELLELVIRIRHIGRVRARKLYN  
AGIRNAEDIVRHREKVASLIGRGAERVVEGISVKSLNPESAAALEHHHHHH

>2PG4A

GMDDETLRLQFGHLIRILPTLLEFEKKGYEPSLAEIVKASGVSEKTFMGLKDRLIRAGLVKEET  
LSYRVKTLKLTEKGRRLAECLEKCRDVLGS

>2PI2E

MGHHHHHHHHSSGHIEGRHMVDMMDLPRSRINAGMLAQFIDKPVCVGRLEKIHPTGKMFILS  
DGEKNGTIELMEPLDEEISGIVEVVGRVTAKATILCTSYVQFKEDSHPFDLGLYNEAVKIIHDF  
PQFYPLGIVQHD

>2PI2A

MWNSGFESYSSSYGGAGGYTQSPGGFGSPAPSQAEEKSRARAQHIVPCTISQLLSATLVDEVFR  
IGNVEISQVTIVGIIRHAEKAPTNIYKIDDMTAAAMDVRQWVDTDDTSSENTVVPPEYVKVAG  
HLRSFQNKSLVAFKIMPLEDMNEFTTHILEVINAHMVLKANSQPSAGRAPISNPGMSEAGNFG  
GNSFMPANGLTVAQNQVLNLIKACPRPEGLNFQDLKNQLKHMVSSIKQAVDFLSNEGHIYSTVD  
DDHFKSTDAE

>2PKHH

SNAARGHRHTCKVMVLKEEAAGSERALALDMREGQRFVHSLIVHFENDIPVQIEDRFVNAQVAPD  
YLKQDFTLQTPYAYLSQVAPLTEGEHVVEAILAEADECKLLQIDAGEPCLLIRRRTWSGRQPVTA  
ARLIHPGSRHRLEGRFTK

>2PNHB

GSHMTNRLVLSGTVCRAPLRKVSPSGIPHCQFVLEHRVQEAAGFHRQAWCQMPVIVSGHENQAI  
THSITVGSRITVQGFISCHKAKNGLSKMVLHAEQIELIDSGD

>2Q2KB

MGSSHHHHHHSSGLVPGSHMDKKEKHLKIKKEDYPQIFDFLENVPRGKTAKAHIREALRRIE  
IGENP

>2Q79A

TTPIVHLKGDANTLKCLRYRFKKHCTLYTAVSSTWHWTGHNVKHKSIVTTLTYDSEWQRDQFLSQ  
VKIPKTITVSTGFMSIGGGTGGGSGGGS

>2QLCA

MNLKVKGARDVFEYMKGRIPDETKEHLFVFLSTKNQILRHETITIGTLTASLIHPREIFKAAIR  
ESAHSIILVHNHPSGDVQPSNADKQVTSILKAGDLLQIELLDHVIVGNNDWFSFRDHALL

>2QPYA

CQPIFLNVLEAIEPGVVCAGHDNNQPDSFAALLSSLNELGERQLVHVVKWAKALPGFRNLHVDDQ  
MAVIQYSWMGLMVFAMGWSFTNVNSRMLYFAPDLVFNEYRMYHKSQCVRMRLHSQEFGLWQ  
ITPQEFKMKALLLFSIIPVDGLKNQKFFDELRMNYIKELDRIACKRKNPTSCSRRFYQLTKLL  
DSVQPIARELHQFTFDLLIKSHMVSVDPEMMAEIIISVQVPKILSGVKPIYFHTQ

>2QSFX

GSGNASSGALGTTGGATDAAQGGPPGSIGLTVEDLLSLRQVVSNGNPEALAPLLENISARYPQLRE  
HIMANPEVVFVSMLEAVGDNMQDVMGADDMVEGEDIIEVTGAAAAAGLGQEGEGSFQVDYTPED  
DQAISRLCELGFERDLVIQVYFACDKNEEAAAANILFSDHAD

>2QSHA

GSSRAMGNEVAGVEDISVEIKPSSKRNSDARTRSRNVCSNEERKRRKYFHMLYLVLCLMVHGFIRN  
EWINSKRLSRKLNSLVPEKVFELLHPQKDEELPLRSTRKLLDGLKCMELWQKHWKITTKYDNEG  
LYMRTWKEIEMSANNKRKFKTLKRSDFLRAVSKGHGDPDISVQGFVAMLRACNVNARLIMSCQPP

DFTNMKIDTSLNGNAYKDMVKYPIFWCEVWDKFSKKWITVDPVNLKTIEQVRLHSKLAPKGVAC  
 CERNMLRYVIAYDRKYGCRDVTTRYAQWMNSKVRKRRITKDDFGEKWFRKVI TALHHRKRTKIDD  
 YEDQYFFQRDESEGI PDSVQDLKNHPYVLEQDIKQTQIVKPGCKECCGYLKVHGKVGKVLKVYAK  
 RDIADLKSARQWYMNGRILKTGSRCKKVIKRTVGRPKGEAEEDERLYSFEDTELYIPPLASASG  
 EITKNTFGNIEVFAPMTIPGNCCLVENPVAIKAARFLGVEFAPAVTSFKFERGSTVKPVLSGIVV  
 AKWLREAIETAIDGIEFI

>2QUQA

KLITASSSKEYLPDLLLLFWQNYEYWITNIGLYKTKQRDLTRTPANLDTDTEECMFWMNYLQKDQS  
 FQLMNFAMENLGALYFGSIGDISELYLRVEQYWDRRADKNHSDGKYWDALIWSVFTMCIYYPV  
 EKLAEIFSVYPLHEYLGSNKRLNWEDGMQLVMCQNFARCSLFQKQCFMAHPDIRLVQAYLILA  
 TTTFFPYDEPLLANSLLTQCIHTFKNFHVDDFRPLLNDPVESIAKVTLGRIFYRLCGCDYLQSGP  
 RKPIALHTEVSSLLQHAAYLQDLPNVDVYREENSTEVLYWKIISLDRDLQYLNKSSKPPLKTL  
 AIRRELDIFQYKVSLEEDFRSNNRFQKFIALFQISTVSWKLFKMYLIYYDTADSLKVIHYSK  
 VIISLIVNNFHAKSEFFNRHPMVMQITRVSFISFYQIFVESAAVKQLLVDLTEL TANLPTIFG  
 SKLDKLVYALTERLSKLLKLLWDKVQLLDSGDSFYHPVFKILQNDIKIIELNDEMFSLIKGLGSLV  
 PLNKLQRQESLLEEDENNTPEPSDFRTIVEEFQSEYNI SDILS

>2RH3A

IQVFLSARPPAPEVSKIYDNLILQYSPSKSLQMLRRALGDFENMLADGSFRAAPKSYPIPHATF  
 EKSIIVQTSRMFPVSLIEAARNHFDPLGLETARAFGHKLATAALACFFAREKATNS

>2ROHA

GSPFADPNLALANVPLSRKRPDFGQRRIRRPFTVAEVELLVEAVEHLGTGRWRDVKFRAFENV  
 HHRTYVDLKDKWKT LVHTASIA PQRRGAPVPQELLDRVLAAQAYWSVDSSGRIVTL

>2RRDA

GIPEFKQKALVAKVSQREEMVKKCLGELTEVCKSLGKVFVHYFNIFNTVTLKLAESLSSDPEV  
 LLQIDGVTEDKLEKYGAEVISVLQKYSEWTS PAEDS

>2RT6A

MKTALLLEKLEGQLATLRQRCAPVSQFATLSARFDRHLFQTRATTLQACLDEAGDNLAALRHAVE  
 QQQLPQVAWLAEHLAAQLEAIAREASAWSLREW

>2VL6C

MEIPSKQIDYRDVFIIEFLTTFKGNQNKYIERINELVAYRKKSLIIEFSDVLSFNENLAYEIIIN  
 NTKIILPILEGALYDHI LQLDPTYQRDIEKVHVRI VGI PRVIELRKIRSTDIGKLITIDGILVKV  
 TPVKERIYKATYKHIHPDCMQEFEPEDPEEMPEVLEMP TICPKCGKPGQFRLIPEKTKLIDWQKA  
 VIQERPEEVPSGQLPRQLEIILEDDLVD SARPGDRVKVTGILDIKQDSPVKRGSRAVFDIYMKVS  
 SIEVSQKV

>2WKCD

GTIITVTAQANEKNTRTVSTAKGDKKIIISVPLFEKEKGSNVKVAYGSAFLPDFIQLGDTVTVSGR  
 VQAKESGEYVNYNFVFPPTVEKVFITNDNSSQSQAQQLDFGGSEPIEVNSEDLPF

>2WP0D

MDTNNNIEKEILALVKQNPVSLIEYENYFSQLKYNPNASKSDIAFFYAPNQVLCTTITAKYGAL  
 LKEILSQNKVGMHLAHSVDVRIEVAPKIQINAQSNINYKAIKTSVKD

>2WP0B

MKNFYDWIKEFIRDQGEFIAQQSGWLELERS SYAKLIAQTISHVLNGGSLLVSADSSRHWFNLNYI  
 LSNLNPKDLKERPLLSVIDFNASSFYPKNDANLSLATIEMTYQNPMFWHVKGKIENEGLKTILLSK  
 IPSFLWLFEELKEDCLLLKEHDSLLDYKLLQLFKLFENALFSVLYNKVTL

>2XE0B

NTKYNKEFLLYLAGFVDGDSIIAQIKPRASNKFAHQSLTFAVTQKTQRRWFLDKLVDEIGVGY  
 VYDSGSVSDYRLSEIKPLHNFLTQLQPFLKQKQANLVLAIIEQLPSAKASPDAFLEVCTWVDQ  
 IAALNDSKTRATTSATVRAALD

>2XIWB

MRGSHHHHHGHSVKKVFLNNGEEKEVDTSKIRDVSRQGNVVKFLYNDNGKYGAGNVDEKDAPKEL  
 LDMLARAEREKKN

>2XMAA

GSHMTYVILPLEMKKGRGYVYQLEYHLIWCVKYRHQVLVGEVADGLKDILRDIAAQNGLVITME  
 VMPDHVHLLLSATPQQAIPDFVKALKGASARRMFVAYPQLKEKLGWGNLWNPSYCILTVSENTRA  
 QIQKYIESQHDKE

>2YPFA

VDLRTLAYSQQQEKIKPKVRSSTVAQHHEALVAHAFTHAHIVALSQHPAALATVAVKYQDMIAAL  
 PEATHEAIVAVAKQWSGARALEALLTVAGELRGPPLQLDTGQLLKIAKRGGVTAVEAVHARNAL  
 TGAPLNLTPEQVVAIASHDGGKQALETVQRLLPVLCQAHGLTPQQVVAIASNNGGKQALETVQRL  
 LPVLCQAHGLTPEQVVAIASNIGGKQALETVQALLPVLCQAHGLTPQQVVAIASNNGGKQALETV  
 QRLLPVLCQAHGLTPEQVVAIASNIGGKQALETVQALLPVLCQAHGLTPEQVVAIASNIGGKQAL  
 ETVQALLPVLCQAHGLTPEQVVAIASNIGGKQALETVQALLPVLCQAHGLTPEQVVAIASHDGGK  
 QALETVQRLLPVLCQAHGLTPEQVVAIASHDGGKQALETVQRLLPVLCQAHGLTPQQVVAIASNG  
 GGKQALETVQRLLPVLCQAHGLTPEQVVAIASNIGGKQALETVQALLPVLCQAHGLTPEQVVAIA  
 SNIGGKQALETVQALLPVLCQAHGLTPEQVVAIASHDGGKQALETVQRLLPVLCQAHGLTPEQV  
 AIASHDGGKQALETVQRLLPVLCQAHGLTPEQVVAIASHDGGKQALETVQRLLPVLCQAHGLTPQ  
 QVVAIASNNGGKQALETVQRLLPVLCQAAGLTPEQVVAIASHDGGKQALETVQRLLPVLCQAHGL  
 TPQQVVAIASNNGGRPALESIVAQLSRPDPGSSAALEHHHHHH

>2YRQA

GSSGSSGMGKGDPPKPRGKMSSYAFFVQTCREEHKKKHPDASVNFSEFSKKCSERWKTMSAKEKG  
 KFEDEMAKADKARYEREMKTYIPPKGETKKKFKDPNAPKRPPSAFFLFCSEYRPKIKGEHPGLSIG  
 DVAKKLGEMWNNTAADDKQPYEKKAACLKEKYEKDIAAYRAKG

>2YVAB

MQERIKACFTESIQTQIAAAEALPDAISRAMTLVQSLNNGNKLCCGNGTSAANAQHFAASMIN  
 RFETERPSLPAIALNTDNVVLTAIANDRLHDEVYAKQVRALGHAGDVLLAISTRGNSRDIKAVE  
 AAVTRDMTIVALTYDGGELAGLLGPQDVEIRIPSHRSARIQEMHMLTVNCLCDLIDNTLFPHQD  
 D

>2Z3XC

AKLLIPQAASAIEQMKLEIASEFGVQLGAETTSTRANGSVGGEITKRLVRLAQQNMGGQFHGQQ

>2Z4RC

MKERILQEIKTRVNRKSWELWFSSFDVKSIEGNKVVFSVGNLFIKEWLEKKYYSVLSKAVKVVLG  
 NDATFEITYEAFEPHSSYSEPLVKKRAVLLTPLNPDYTFENFVVGPGNSFAYHAALEVAKHPPGRY  
 NPLFIYGGVGLGKTHLLQSIGNYVVQNEPDLRVMYITSEKFLNDLVDSMKEGKLNFEFREKYRKKV  
 DILLIDDVQFLIGKTGVQTELFHTFNEHDSGKQIVICSDREPQKLSEFQDRLVSRFQMGVLAKL  
 EPPDEETRKSIAKMLEIEHGELPEEVLNFVAENVDDNLRRLRGAIKLLVYKETTGKEVDLKEA  
 ILLKDFIKPNRVKAMDPIDELIEIVAKVTGVPREEILSNRNKALTARRIGMYVAKNYLKSSL  
 RTIAEKFNRSHPVVVDSVKKVKDSLLKGNKQLKALIDEVIGEISRRALSG

>2ZDSF

MPRNFTLFTGQWADLPLEEVCRLARDFGYDGLELACWGDHFEVDKALADPSYVDSRHQLLDKYGL  
 KCWAI SNHLVQAVCDAI I DERHEAILPARIWGDGDAEGVRQAAAAEIKDTARAAAARLGVDTVIG  
 FTGSAIWHLVAMFPAPAPESMIERGYQDFADRWNPIILDVFDAEGVRF AHEVHPSEIAYDYWTTHRA  
 LEAVGHRPAFGLNFDPSHFVWQDLDPVGF LWDFRDRIYHVDCKEARKRLDGRNGRLGSHLPW GDP  
 RRGWDFVSAGHGDPWEDVFRMLRSIDYQGPVSVEWEDAGMDRLQGAPEALTRLKAFDFEPPSAS  
 FDAAFNSLEHHHHHH

>2ZQEA

MREVEVDLRGLTVAEALLEVDQALEEARALGLSTLRLLHGKGTGALRQAIREALRRDKRVESFA  
 DAPPGEGGHGVTVVALRP

>2ZTCD

MASMTGGQQMGRGSEFMIA SVRGEVLEVALDHVVEAAGVGYRVNATPATLATLRQGTEARLITA  
 MIVREDSMTLYGFPDGETRDLFLTLTLLSVSGVGPRLAMAALAVHDAPALRQVLADGNVAALTRVPG  
 IGKRG AERMVLELRDKVGVAATGGALSTNGHAVRSPVVEALVGLGFAAKQAE EATDTVLAANHDA  
 TTSSALRSALSLLGKAR

>3AL2A

GPLGSLKKQYIFQLSSLN PQERIDYCHLIEKLGGLVIEKQCFDPTCTHIVVGHPLRNEKYLASVA  
 AGKWWLHRSYLEACRTAGHFVQEEDYEWGSSSILDVLTGINVQQRR LALAAMRWRKKIQQRQESG  
 IVEGAFSGWKVILHVDQSREAGFKRLLQSGGAKVLPGHSVPLFKEATHLFSDLNKLPDDSGVNI  
 AEAAAQNVYCLRTEYIADYLMQESPPHVENYCLPEAISFI

>3AQQD

MSSEPPPPPQPPTHQASVGLLDTPRSRRSPSPLRGNVVPSPLPTRRTRTFSATVRASQGPVYKG  
 VCKCFCRSKGHGFITPADGGPDI FLHISDVEGEYVPVEGDEVTYKMCSI PPKNEKLQAVEVWITH  
 LAPGTKHETWSGHVISS

>3ASKA

SLYKVNEYVDARDTNMGAWFEAQVVRVTRKAPSRPALEEDVIYHVKYDDYPENGVVQMNSRDVRA  
 RARTI IKWQDLEVGQVVMLNYPDNPKERGFWDYDAEISRKRETRTARELYANVVLGDDSLNDCRI  
 IFVDEVFKIERPGE GSPMVDNPMRRKSGPCKHCKDDVNRLCRVCACHLCGGRQDPDKQLMCDEC  
 DMAFHIYCLDPPLSSVPSSEDEWYCPECRNDA

>3AXJB

MPKNGGAGHRNTAPRKRQIPAAQLDEDSPIVQQFRIYSNELIMKHDRHERIVKLSRDITIESKRI  
 IFLHSIDSRKQNKKEKVL EEARQRLNKLIAVNFRAVALELRDQDVYQFRSSYSPGLQEFIQAYTY  
 MEYLCHEDAEGENETKSVSDWQAIQAVMQYVEESSQPKEEPTEGEDVQAIQVESPKKFQFFVDP  
 TEYILGLSDLTGELMRRCINSLGSGD TDTCLDTCKALQHFYSGYISLNCQRARELWRKITTMKQS  
 VLKAENVVCYNVKVRGGEAAKWGATFDQKPADEVDEGFY

>3B0CT

GSTREPEIASSLIKQIFSHYVKTPVTRDAYKIVEKCSERYFKQISSDLEAYSQHAGRKT VEMADV  
 ELLMRRQGLVTDKMPLHVLVERHLPLEYRKL LPIAVSGNKVIPCK

>3BOSB

GMRSNRVTQHPPLQLSLPVHLPDDETF TSYYP AAGNDELIGALKSAASGDGVQAIY LWGPVKSGR  
 THLIHAACARANELERRSFYIPLGIHASISTALLEGLEQFDLICIDDVDAVAGHPLWEEAIFDLY  
 NRVAEQKRGLIVSASASPMEAGFVLPDLVSRMHWGLTYQLQPMMDDEKLAALQRRAMRGLQLP  
 EDVGRFLLNRMARDLRTLFDVLDRLDKASMVHQKLTIPFVKEMLRL

>3BRFA

SGPLGSGDSVQSLTSDRMIDFLSNKEKEYECVISIFHAKVAQKSYGNEKRFFC P P P C I Y L I G Q G W K

LKKDRVAQLYKTLKASAQKDAAIENDPIHEQQATELVAYIGIGSDTSERQQQLDFSTGKVRHPGDQ  
 RQDPNIYDYCAAKTLYISDSDKRKYFDLNAQFFYGCMEIGGFVSQRIKVISKPSKKKQSMKNTD  
 CKYLCIASGTKVALFNRLRSQTVSTRYLHVEGNAFHASSTKWGAFTIHLFDDERGLQETDNFAVR  
 DGFVYYGSVVKLVDSVTGIALPRLRIRKVKDQVILDASCSEEPVSQLHKCAFQOMIDNELVYLCL  
 SHDKIIQHQATAINEHRHQINDGAAWTIISTDKAEYRFFEAMGQVANPISPCPVVGSLEVDGHGE  
 ASRVELHGRDFKPNLKVWFGATPVETTRSEESLHCSI PPVSQVRNEQTHWMFTNRRTGDVEVPI  
 SLVRDDGVVYSSGLTFSYKSLER

>3BS3A

SNAMSNNQQMMLNRIKVVLAEKQRTNRWLAEQMGKSENTISRWCNKSQPSLDMLVKVAELLNVD  
 PRQLINGKIKI

>3BTPB

MVI IKLNANKNMPVLAVEKQEIHKHEELSDHHQSNGFTSLDLEMI ELENFVLHCPLPEENLAG

>3BTPA

MDPKAEGNGENITETAAGNVETSDFVNLKRQKREGVNSTGMSEIDMTGSQETPEHNMHGSPTHTD  
 DLGPRLDADMLDSQSSHVSSAQGNRSEVENELSNLFAKMALPGHRRRTDEYIILVRQTGQDKFAG  
 TTKCNLDHLPTKAEFNASCRLYRDGVGNYPPLAFERIDLPEQLAAQLHNLEPREQSKQCFQYK  
 LEVWNRAHAEMGITGTDIFYQTDKNIKLDRNYKLRPEDRYIQTEKYGRREIQKRYEHQFQAGSLL  
 PDILIKTPQNDIHFSYRFAGDAYANKRFEEFERAIKTKYGSDETEIKLKS KSGIMHDSKYLESWER  
 GSADIRFAEFAGENRAHNKQFPAATVNMGRQPDGQGGMTRDRHVSVDYLLQNL PNSPWTQALKEG  
 KLWDRVQVLARDGNRYMSPSRLEYSDPEHFTQLMDQVGLPVMGRQSHANSVKFEQFDRQAAVIV  
 ADGPNLREVPDLSPEKLQQLSQKDVLIADRNEKGQRTGTYTNVVEYERLMMKLPDAAQLLAEPS  
 DRYSRAFVRPEPALPPI SDSRRTYESRPRGPTVNSL

>3BU8B

GAGEARLEEAVNRWVLKFFHEALRAFRGSRYGDFRQIRDIMQALLVRPLGKEHTVSRLLRVMQC  
 LSRIEEGENLDCSFDMEAELTPLESAINVLEMIKTEFTLTEAVVESSRKLVEKAAVIICIKNEF  
 EKASKILKKHMSKDPTTQKLRNDLLNI IREKNLAHPVIQNF SYETFQQKMLRFLESHLDDAEPYL  
 LTMAKKALKSESAASSTGKEDKQPAPGPVEKPPREPARQL

>3C1DB

GPAYARLLDRAVRILAVRDHSEQELRRKLAAPIMGKNGPEEIDATAEDYERVI AWCHEHGYLDDS  
 RFVARFIASRSRKGYPARIRQELNQGKISREATEKAMREADIDWAALARDQATRKYGEPLPTVF  
 SEKVKIQRFLLYRGYLMEDIQDIWRNFAD

>3C1YB

MGSSHHHHHHSSGLVPRGSHMGVKS LVPQELIEKIKLISPTELKALDDIINANFGALIFLVDD  
 PKKYEDVIQGGFWLDTDFSAEKLYELSKMDGAIVLSEDITKIYANVHLVPDPTIPTGETGTRHR  
 TAERLAKQTGKVVI AVSRRNIIISLYYKNYKYVVNQVDFLISKVTQAI STLEKYKDNFNKLLSEL  
 EVLELENRVTLADVVRTLAKGFELLRIVEEIRPYIVELGEEGRLARMQLRELTEDVDDLLVLLIM  
 DYSSEEEVEETAQNILQDFITRREPSPI SISRVLG YDVQQAQLDDVLVSARGYRLKTVARIPL  
 SIGYNVVRMFKTLDQISKASVEDLKKVEGIGEKRARAISESISLKHRTSE

>3CNBC

MSLNVKNDFSILIIEDDKEFADMLTQFLENLFPYAKIKIAYNPF DAGDLLHTVKPDVVMLDLMMV  
 GMDGFSICHRIKSTPATANI IVIAMTGALTDDNVSRIVALGAETCFGKPLNFTLLEKTIKQLVEQ  
 KKATSEGHHHHHH

>3D6WB

GKSVVTLKTTDGWIPVPFSKVMYLEAKDKKTYVNAEELTGTHKYSLQEF EYLLPKDSFIRCHRSF

IVNVNHKAIYPDTHSTFLLSMDNGERVPVSQSYASYFRKLLGFGS

>3DPJA

SNAMVQAQTRDQIVAAADELFYRQGFAQTSFVDISA AVGISRGNFYHFKTKDEILAEVIRLRLA  
RTAQM LADWQGTGDS PRARIASFIDL MIMNRAKITRYGCPV GSLCTELSKLDHAAQGGQANGLFTL  
FRDWLQRQFAEAGCTTEAPALAMHLLARSQGAATLAQSFHDEGFLRSEVADMHRWLDNTLPMTT

>3EI4F

MHHHHHHRRLVPRGSGGRQKTSEIVLRPRNKRSRSPLELEPEAKKLCAGSGPSRRCDSDCLWVG  
LAGPQILPPCRSIVRTLHQHKLGRASWPSVQQGLQQSFLHTLDSYRILQKAAPFDRRATSLAWHP  
THPSTVAVGSKGGDIMLWNFGIKDKPTFIKIGAGGSITGLKFNPLNTNQFYASSMEGTTRLQDF  
KGNILRVFASD TINIWFCSLDVSASSRMVVTGDNVGNVILLNMDGKELWNLRMHKKKVT HVALN  
PCCDWFLATASVDQTVKIWDLRQVRGKASFLYSLPHRHPVNAACFSPDGARLLTTDQKSEIRVYS  
ASQWDCPLGLIPHPHRHFQHLTPIKA AWHPRYNLIVVGRYPDPNFKSCTPYELRTIDVFDGNSGK  
MMCQLYDPESGSISSLNEFNPMGDTLASAMGYHILIWSQEEARTRK

>3EIVD

MAGETVITVVGNLVDDPELRFTPSGA AVAKFRVASTPRTFDRQTNEWKDGESLFLTCSVWRQAAE  
NVAESLQRGM RVIVQGR LKQRSYEDREGVKRTVYELDVDEVGASLR SATAKVTKTSGQGRGGQGG  
YGGGGGGQGGGGWGGGPGGGQQGGGAPADDPWATGGAPAGGQQGGGGQGGGGWGGGSGGGGGYSD  
EPPF

>3EQXB

GMEWQAEQAYNHL PPLPLDSKLAELAETLPILKACIPARAALAE LKQAGELLPNQGLLINLLPLL  
EAQGSSEIENIVTTT DKLFQYAQEDSQADPMTKEALRYRTALYQCFTQLSNRPLCVTTALEICST  
IKSVQMDVRKVPGTSLTNQATGEVIYTPPAGESVIRDLLSNWEAFLHNQDDVDPLIKMAMAHYQF  
EAIHPFIDGNRTGRVLNILYLIDQQLLSAPILYLSRYIVAHKQDYRLLLNVTTQQEWQPWIIIF  
ILNAVEQTAKWTHKIAAARELIAHTTEYVRQQLPKIYSHELVQVIFEQPYCRIQNLVESGLAKR  
QTASVYLKQLCDIGVLEEVQSGKEKLFVHPKFVTLMTKDSNQFSRYAL

>3EUSB

QAMTKTLRTP EHVYLCQRLRQARLDAGLTQADLAERLDK PQSFVAKVETRERRLDVIEFAKWMAA  
CEGLDVVSEIVATIAEGRAQA

>3EYIB

HMASPQFSQQREEDIYRFLKDN GPQRALVIAQALGMRTAKDVNRDLYRMKSRHLLDMDEQSKAWT  
IYRWTIY

>3EZ2A

MSDSSQLHKVAQRANRMLNVLTEQVQLQKDELHANEFYQVYAKAALAKLPLLTRANVDYAVSEME  
EKGYVFDKRPAGSSMKYAMSIQNIIDIYHRGVPKYRDRYSEAYVIFISNLKGGVSKTVSTVSLA  
HAMRAHPHLLMEDLRILVIDLDPQSSATMFLSHKHSIGIVNATSAQAMLQNVSR EELLEEFIVPS  
VVPGVDVMPASIDDAFIASDWRELCNEHLPQNIHAVLKENVIDK LKSDYDFILVDSGPHLDAFL  
KNALASANILFTPLPPATVDFHSSLKYVARLPELVKLISDEGCECQLATNIGFMSKLSNKADHKY  
CHSLAKEVFGDMLDVFLPRLDGFERCESFDTVISANPATYVGSADALKNARIAAEDFAKAVFD  
RIEFIRSN

>3F1ZA

GASKAFYSAGDKLFQPGDDAVASMQTY SVAQFLQPF TLNPAKASSDYLGKWKVVRGVIVDIRRKS  
GIAGSYFIVTMRDEQNKT DKRLTFNFGSHNSADVEALSNGSVATIVGQVHQVQDSTIPTLQNPK  
VVK

>3F6CB

SLNAI I IDDHPLAIAAIRNLLIKNDIEILAELEGGSAVQRVETLKPDI V I I DV D I P G V N G I Q V L  
 ETLRKRQYSGII I I V S A K N D H F Y G K H C A D A G A N G F V S K K E G M N N I I A A I E A A K N G Y C Y F P F S L N R  
 FVGS

>3FDQB

MPKSEIRKLLQEIKKQVDNPGNSSTTEIKKMASEAGIDEQTAE E I Y H L L T E F Y Q A V E E H G G I E K Y  
 MHSNISWLKIELELLSACYQIAILEDKMLVDISEMLSLNLDLRI FPKTPSQLQNTYYKLLKELIQV  
 EDIPKNKPGRKRKTQKNTKKEKTNI FGKVVPALEHHHHHH

>3FDQA

MPKSEIRKLLQEIKKQVDNPGNSSTTEIKKMASEAGIDEQTAE E I Y H L L T E F Y Q A V E E H G G I E K Y  
 MHSNISWLKIELELLSACYQIAILEDKMLVDISEMLSLNLDLRI FPKTPSQLQNTYYKLLKELIQV  
 EDIPKNKPGRKRKTQKNTKKEKTNI FGKVVPALEHHHHHH

>3FHWB

MNTLELSARVLECGAMRHTPAGLPALELLLVHSEVVEAGHPRRVELTISAVALGDLALLLADTP  
 LGTEMQVQGFAPARKDSVKVHLHLQQARRIAGSMGRDPLVGLHHHHHH

>3FRQA

GMPPKLSDDDEVLEAATVVLKRCGPIEFTLSGVAKEVGLSRAALIQRFTNRDTLLVRMMERGVE  
 QVRHYLNAIPIGAGPQGLWEFLQVLVRSMNTRNDFSVNYLISWYELQVPELRTLAIQNRNAVVEG  
 IRKRLPPGAPAAAELLLHSVIAGATMQWAVDPDDELADHVLAQIAAILCLMFPEHDDFQLLQAHA

>3FYMA

MKTVGEALKGRRERLGMTLLEQRTGIKREMLVHIENNEFDQLPNKNYSEGFIKRYASVVNIEP  
 NQLIQAHQDEIPSNQAEWDEVITVFNKNDLDYKSKSKEPIQLLVIMGITVLITLLLWIMLVLIF

>3G1CA

MNNKLTQAVEQLFQAILSLKDLDEAYDFEDVCTINEILSLSQRFVAKMLREHRTYLDIAEKT  
 GASTATISRVRSLNYGNDGYDRVFERLGMLEKESEDNK

>3GIOB

MGSSHHHHHSSGLVPRGSHMPNTSQRNSFLQDVPYWMLQNRSEYITQGVDSHIVDGKKTEEIE  
 KIATKRATIRVAQNIHVHLKEAYLSKTNRKQKITNEMFIQMTQPIYDSL MNVDRLGIYINPNNE  
 EVFALVRARGFDKDALSEGLHKMSLDNQAVSILVAKVEE I F K D S V N Y G D V K V P I A M

>3GN5B

GHMKCPVCHQGEMVSGIKDIPYTFRGRKTVLKG I H G L Y C V H C E E S I M N K E E S D A F M A Q V K A F R A S  
 VNAETVAPEFIVKVRKLSLTQKEASEIFGGGVNAFSRYEKGNAQPHPSTIKLLRVLDKHPPELLN  
 EIR

>3GVAB

MRMDEFYTKVYDAVCEIPYGVSTYGEIARYVGMPSYARQVQAMKHLHPETHVPWHRVINSRGT  
 ISKRDISAGEQRQKDRLEEEGVEIYQTSLGEYKLNLP E Y M W K P G S H H H H H H

>3GXQB

ENSVFFGKKKVSLLHLLVDPDMKDEI I K Y A Q E K D F D N V S Q A G R E I L K K G L E Q I A

>3GYDB

MGSDKIH H H H H H E N L Y F Q G M Y P D L V H L G G A D K Y F E E I L E I V N K I K L F G D F S N E E V R Y L C S Y M Q C Y  
 AAPRDCQLLTEGDPGDYLLLIITGEVNVIKDIPNKGIQTIAKVGAGAIIGEMSMIDGMPSRASCV  
 ASLPTDFAVLSRDALYQLLANMPKLGKVLIRLLQLLTARFRESYDRILPKTLGELI

>3GZ5B

GSHMTEAEYLANYDPKAFKAQLLTVDAVLFTYHDQQLKVLVQVRSNHPFLGLWGLPGGFIDETCD  
 ESLEQTVLRKLAEKTAVVPPYIEQLCTVGNNSRDARGWSVTVCYTALMSYQACQIQIASVSDVKW

WPLADVLMPLAFDHLQLIEQARERLTQKALYSLVPGFALSEPFTLPELQHVHEVLLGKPIQGKS  
 FRRRVEQADLLIDTGLKRTERGRPANLYCLKPDTASYRFLRNLEC

>3H4LB

GSMTQIHQINDIDVHRITSGQVITDLTTAVKELVDNSIDANANQIEIIFKDYGLESIECSDNNGD  
 IDPSNYEFLALKHYTSKIAKFQDVAKVQTLGFRGEALSSSLCGIAKLSVITTTSPPKADKLEYDMV  
 GHITSKTTTTSRNKGTTLVLSQLFHNLPVRQKEFSKTFKRQFTKCLTVIQGYAIINAAIKFSVWNI  
 TPKGKKNLILSTMRNSSMRKNISSVFGAGGMRGLEEVLDLVLNPFKNRMLGKYTDDPDFLDLDY  
 KIRVKGYISQNSFGGRNSKDRQFIYVNRKRPVEYSTLLKCCNEVYKTFNNVQFPAVFLNLELPMS  
 LIDVNVTPDKRVILLHNERAVIDIFKTTLSDYYNRQELALPK

>3HI2D

GSHMEKRTPHTRLSQVKKLVNAGQVVRTTRSALLNADELGLDFDGMCNVIIIGLSESDFYKSMTTYS  
 DHTIWQDVYRPRLVGTGQVYLKITVIHDVLIVSFKEK

>3HOSA

MSSFVPNKEQTRTVLIFCFHLKKTAAESHRLVEAFGEQVPTVKTTCERWFQRFKSGDFDVEDDKEH  
 GKPPKRYEDAELQALLDEDDAQTKQLAEQLEVSQQAVSNRLREMGKIQKVGRWVPHELNERQME  
 RRKNTCEILLSRYKRKSFLHRIVTGDEKWIFFVNPKRKKSYPVDPGPATSTARPNRFGKKTMLCV  
 WWDQSGVIYYELLKPGETVNAARYQQQLINLNRALQRKRPEYQKRQHRVIFLHDNAPSHTARAVR  
 DTLETNLNWEVLPHAAAYSPDLAPSDYHLFASMGHALAEQRFDSYESVKKWLDEWFAAKDDEFYWRG  
 IHKLPERWEKCVASDGKYFE

>3HTAD

MGSSHHHHHSSGLVPRGSHMPRRHDPERRQRIIDAAIRVVGQKGIAGLSHRTVAAEADVPLGST  
 TYHFATLDDLMVAALRQANEGFARVVAHAHPALSDPEADLSGELARVLGEWLGGDRGTGVELEYELY  
 LAALRRPALRPVAAEWAEGVGALLAARTDPTTARALVAVLDGICLQVLLTDTPYDEEYAREVLTR  
 LIPVPATRDGRGPGSHPPATAG

>3I54D

MGSSHHHHHSSGLGGTENLYFQSHMDEILARAGIFQGVESAIAALTKQLQPVDFPRGHTVFAE  
 GEPGDRLYIIISGKVKIGRRAPDRENLLTIMGPSDMFGELSI FDPGPRTSSATTITEVRAVSMD  
 RDALRSWIADRPEISEQLLRVLARRLRRTNNNLADLI FTDVPGRVAKQLLQLAQRFGTQEGGALR  
 VTHDLTQEEIAQLVGASRETVNKALADFAHRGWIRLEGKSVLISDSERLARRAR

>3II2A

GSEMSVVEYEVVSKNLTSKMSHELLFSVKKRWFVKPFRHQRGLGKLHYKLLPGNYIKFGLYVLKN  
 QDYARFEIAWVHVDKDGKIEERTVYSIETYWHIFIDIENDLNCYPVLAKFIEMRPEFHKTAWVEE  
 SNYSIAEDDIQMVESIKRYLERKIASD

>3II6X

GAMGSKISNIFEDVEFCVMSGTDSQPKPDLENRIAEFGGYIVQNPDPDTCVIAGSENIRVKNI I  
 LSNKHDVVKPAWLLFCFKTKSFVPWQPRFMIHMCPSTKEHFAREYDCYGDSYFIDTDLNQLKEVF  
 SGIKNSNEQTPEEMASLIADLEYRYSWDCSPLSMFRRHTVYLDYAVINDLSTKNEGTRLAIKAL  
 ELRFHGAKVVSCLAEGVSHVIIGEDHSRVADFKAFRRTFKRKFKILKESWVTDSIDKCELQEENQ  
 YLI

>3II6A

MERKISRHLVSEPSITHFLQVSWEKTLESGFVITLTDGHSAWTGTVSESEISQEADDMEMEKGK  
 YVGELRKALLSGAGPADVYTFNFSKESCYFFFEKNLKDVSFRLGSFNLEKVENPAEVIRELICYC  
 LDTTAENQAKNEHLQKENERLLRDWNDVQGRFEKCVSAKEALETDLYKRFILVLNEKKTIRSLH  
 NKLLNAAQ



>3I05B

GSHMDVVRTKIPMMNIALSGEITGGMQSGLLILAGPSKSFKSNFGLTMVSSYMRQYPDAVCLFYD  
SEFGITPAYLRSMGVDPERVIHTPVQSLEQLRIDMVNQLDAIERGEKVVVFIDSLGNLASKKETE  
DALNEKVVSDMTRAKTMKSLFRIVTPYFSTKNIPCIAINHTYETQEMFSKTVMGGGTGPMYSADT  
VFIIGKRQIKDGSDLQGYQFVLNVEKSRTVKEKSKFFFIDVKFDGGIDPYSGLLDMALELGFVVKP  
KNGWYAREFLDEETGEMIREEKSWRAKDTNCTTFWGPLFKHQPFRAIKRAYQLGAIDSNEIVEA  
EVDELINS

>3IV5B

MFEQRVNSDVLTVSTVNSQDQVTQKPLRDSVKQALKNYFAQLNGQDVNDLYELVLAEEVEQPLLD  
VMQYTRGNQTRAALMMGINRGTLRKKLKKYGMN

>3IVPD

MRKKEDKYDFRALGLAIKEARKKQGLTREQVGAMIEIDPRYLNIENKGQHPSLQVLYDLVSLLN  
VSVDEFFLPASSQVKSTKRRQLENKIDNFTDADLVIMESVADGIVKSKEVGEMAGENLYFQ

>3JU0A

MSLTDSKVKNASLEKEYKLTDFGMHLLVHPNGSKYWRLSYRFEKKQRLLAGVYPVAVSLADAR  
QRRDEAKLLAAGIDPSAKKQADNKTIQEKRNTRLEHHHHHH

>3K2AB

GSgifpkvatnimrawlfqhlthpypseeqkkqlaodtgltilqvnnwfinarrriVQPMIDQSN  
RA

>3K4XA

GPHMASMLEAKFEEASLFKRIIDGFKDCVQLVNFQCKEDGIIAQAVDDSRVLLVSLEIGVEAFQE  
YRCDHPVTLGMDLTSLSKILRCGNNTDTLTLIADNTPDSIILLFEDTKKDRIA EYSLKLM DIDAD  
FLKIEELQYDSTLSLPSSEFSKIVRDLSQLSDSINIMITKETIKFVADGDIGSGSVI IKPFVME  
HPETS IKLEMDQPVDLTFGAKYLLDI IKGSSLSDRVGIRLSSEAPALFQFDLKSGLQFFLAPKF  
NDEGSNSQNSGSGALEAKFEEASLFKRIIDGFKDCVQLVNFQCKEDGIIAQAVDDSRVLLVSLEI  
GVEAFQ EYRCDHPVTLGMDLTSLSKILRCGNNTDTLTLIADNTPDSIILLFEDTKKDRIA EYSLK  
LMDIDADFLKIEELQYDSTLSLPSSEFSKIVRDLSQLSDSINIMITKETIKFVADGDIGSGSVI I  
KPFVMEHPETS IKLEMDQPVDLTFGAKYLLDI IKGSSLSDRVGIRLSSEAPALFQFDLKSGLQ  
FFLAPKF NDEGSNSQASNSGSGALEAKFEEASLFKRIIDGFKDCVQLVNFQCKEDGIIAQAVDDSRV  
LLVSLEIGVEAFQ EYRCDHPVTLGMDLTSLSKILRCGNNTDTLTLIADNTPDSIILLFEDTKKDR  
IAEYSLKLM DIDADFLKIEELQYDSTLSLPSSEFSKIVRDLSQLSDSINIMITKETIKFVADGDI  
GSGSVI IKPFVMEHPETS IKLEMDQPVDLTFGAKYLLDI IKGSSLSDRVGIRLSSEAPALFQFD  
LKSGLQFFLAPKF NDEE

>3KDEC

MKYCKFCCKAVTGVKLIHVPKCAIKRKLWEQSLGCSLGENSQICDTHFNDSQWKAAPAKGQTFKR  
RRLNADAVPSKV

>3KHKB

MSLDIEQQFLNDLDNQLWRAADKLRNLDAAANYKHVVGLIFLKYVSDAFEERQQELTELFQKDD  
DDNIYYLPREDYDSDEAYQQAIAEELEIGDYYTEKNVFWVPKTARWNKLRDVITLPTGSVIWQDE  
QGEDVKLRVSWLIDNAFDDIEKANPKLKGILNRISQYQLDADKLI GLINEFSLTSFNNPEYNGE  
KLNLKSKDILGHVY EYFLGQFALAEGKQGGQYYTPKSIVTLIVEMLEPYKGRVYDPAMGSGGFFV  
SSDKFIEKHANVKHYNASEQKKQISVYQGESNPTTWKLAAMNMVIRGIDFNFGKKNADSFDDQH  
PDLRADFVMTNPPFNMKDWWHEKLADDPRWTINTNGEKRI LTPPTGNANFAWMLHMLYHLAPTGS  
MALLLANGSMSNTNNEGEIRKTLVEQDLVECMVALPGQLFTNTQIPACIWFLLTKDKNAKNGKRD

RRGQVLFIDARKLGYMKDRVLRDFKDEDIQKLADTFHNWQQEWSEENNQAGFCFSADLALIRKND  
FVLTPGRYVGAEAEDEGHHHHHH

>3KJOA

MSLVPATNYIYTPLNQLKGGTIVNVYGVVKKFPYLSKGTDYCSVVTIVDQTNVKLTCLLFSGN  
YEALPIIYKNGDIVRFHRLKIQVYKKETQGITSSGFASLTFEGTLGAPIIPRTSSKYFNFTTEDH  
KMVEALRVWASTHMSPSWTLLKLCDVQPMQYFDLTCQLLGKAEVDGASFLLKVVWDGTRTPFPSWR  
VLIQDLVLEGLDLSHIHRLQNLTDILVYDNHVVHVARSLKVGSLRIYSLHTKLQSMNSENQTMLS  
LEFHLHGGTSYGRGIRVLPESNSDVDQLKKDLESANLTA

>3KOJB

MGHHHHHHSHMNSCILQATVVEAPQLRYAQDNQTPVAEMVVQFPGLSSKDAPARLKVVGWGAQAQ  
ELQDRCLRNDDEVVLEGRRLRINSLKPDGNREKQTELTVTRVHH

>3LDAA

MSQVQEQHISESQLQYNGSLMSTVPADLSQSVVDGNGNGSSEDI EATNGSGDGGGLQEQAQAQ  
EMEDEAYDEAALGSFVPIEKLQVNGITMADVKKLRESGLHTAEAVAYAPRKDLLEIKGISEAKAD  
KLLNEAARLVPMGFVTAADFHMRRSELICLTGSKNLDLTLGGGVETGSI TELFGEFRTGKSQCLC  
HTLAVTCQIPLDIGGEGKCLYIDTEGTFRPVRLVSI AQRFGLDPDDALNNVAYARAYNADHQLR  
LLDAAAQMMSESRLFSLIVVDSVMALYRTDFSGRGELSARQMHLAKFMRALQRLADQFGVAVVVTN  
QVVAQVDGGMAFNPDPKPIGGNIMAYSSTTRLGFKKGGKGCQRLCKVVVDSPLPEAECVFAIYED  
GVGDPREEDE

>3LHKD

SNAKIIGYARVSFNAQKDDLERQIQLIKSYAEENGWDIQILKDIGSGLNEKRKNYKLLKMMVNR  
KVEKVI IAYPDRLTRFGFETLKEFFKSYGTEIVI INKKHKTPQEELVEDLITIVSHFAGKLYGMH  
SHKYKKLTKTVKEIVREEDAKEKE

>3M03C

MSNIGIRDLAVQFSCIEAVNMAKILKSYESSLPQTQQVDLDSRPLFTSAALLSACKILKLVKVD  
KNKMVATSGVKKAI FDRLCQLEKIGQQVD

>3M8EB

MGSSHHHHHSSGLVPRGSHMNRDHFYTLNIAEIAERIGNDDCAYQVLMAFINENGEAQMLNKTA  
VAEMIQLSKPTVFATVNSFYCAGYIDETRVGRSKIYTLSDLGVEIVECFKQKAMEMRNL

>3MAJA

GHMDVGERSSDQGTTLVTEAQRIDWMRLIRAENVGPRTRFRSLINHFGSARAALERLPELARRGGA  
ARAGRIPSEDEARREIEAGRRIGVELVAPGETGYPTRLATIDDAPPLLGVHALPEALAVMARPMI  
AIVGSRNASGAGLKFAQLAADLGAAGFVVISGLARGIDQAAHRASLSSGTAVAVLAGGHDKIYPA  
EHEDLLLDIIQTRGAAISEMPLGHVPRGKDFPRRNRLISGASVGVAVIEAAYRSGSLITARRAAD  
QGREVFVAVPGSPLDPRAAGTNDLIKQGATLITSASDIVEAVASILERPIELPGREPEHAPPEGEP  
DTGDRTRILALLGSPVGGIDDLIRLSGISPAVVRTILLELELAGRLERHGGSLVSL

>3MKYB

MGSSHHHHHSSGLVPRGSHYRPTSAYERGQRYASRLQNEFAGNISALADAENISRKII TRCINT  
AKLPKSVVALFVSHPGELSARSGDALQKAFTDKEELLKQQASNLHEQKKAGVIFEADEVITLLTSV  
LKTSSASRTSLSSRHQFAPGATVLYKGDKMVLNLD RSRVPTECIEKIEAILKELEKPPAP

>3MU6D

GRKKIQITRIMDERNRQVTFTRKRFGLMCKAYELSVLCDCEIALIIFNSSNKLQYASTDMDKVL  
LKYTAY

>3MUJB

SMEATPCIKAISPSEGWTTGGATVIIIGDNFFDGLQVVFGTMLVWSELITPHAIRVQTPPRHIPG  
VVEVTLSYKSKQFCKGAPGRFVYTALNEPTIDYGFQRLQKVI PRHPGDPERLPKEVLLKRAADLV  
EALYGMPH

>3N4PA

MGHHHHHDYDIPTTENLYFQGGTNKISQNTVLITDQSREEFDILRYSTLNTNAYDYFGKTLVY  
YLDPAFTTNRKASGTGVAAGVAYRHQFLIYGLEHFFLRDLSESSEVAIAECAAHMII SVLSLHPY  
LDELRIAVEGNTNQAAAVRIACLIRQSVQSSSTLIRVLFYHTPDQNHIEQPFYLMGRDKALAVEQF  
ISRFNNGYIKASQELVSYTIKLSHDPIEYLLEQIQNLHRVTLAEGTTARYSAKRQNRISDDLIIA  
VIMATYLCDDIHAI RFRVS

>3NCTD

MKTELTLNVLQTMNAQEYEDIRAAGSDERRELTHAVMRELDAPDNWTMNGEYGFSEFGGFFPVQVR  
FTP AHERFHLALCSPGDVSVQVWVVLVNLVAGGEPFAVVQVQRRFASEAVSHSLALAASLDTQGYSV  
NDIIHILMAEGGQV

>3NFHB

MTDSAIDIVDSVRTASKDLPTRAQLDEITSNDRPTPLANIDATDVEQIYPIESII PKKELQFIRV  
SSILKEADKEKKLELFPYQNNISKYVAKKLDLSLTQPSQMTKLQLLYYLSLLLGVYENRRVNNKTKL  
LERLNSPPEILVDGILSRFTVIKPGQFGRSKDRSYFIDPQNE DKILCYILAIIMHLDNFIVEITP  
LAHELNLKPSKVVS LFRVLGAI VKGATVAQAEAFGIPKSTAASYKIATMKV

>3NO7A

GPEASARSEVKMTVTVGEERRARLRTAYTLTHLQEGHRTFSGFIAAALDAEVQRLEQRYNEGRRF  
ENAERGVTRGRPLGS

>3NQUA

MGPRRRSRKPEAPRRRSPSPTPTPGPSRRGPSLGASSHQHSRRRQGWLKEIRKLQKSTHLLIRKL  
PFSRLAREICVKFTRGVDFNWQAQALLALQEAEEAFLVHLFEDAYLLTLHAGRVTLFPKDVQLAR  
RIRGLEEGLG

>3NR7B

GSHMSEALKILNNIRTLRAQARESTLETLEEMLEKLEV VVNERREEESAAAAEVEERTRKLQOYR  
EMLIADGIDPNELLNSMAAAK

>3NXCA

MPPGKCLFSGVFCNMAEKQTAKRNRREEILQSLALMLESSDGSQRITTA KLAASVGVSEAALYRH  
FPSKTRMFDSLIEFIEDSLITRINLILKDEKDTTARLRLIVLLLLGFGERNPGLTRILTGHALMF  
EQDRLQGRINQLFERIEAQLRQVLREKRMREGEGYATDETLLASQILAFCEGMLSRFVRSEFKYR  
PTDDFDARWPLIAAQLQ

>3O27B

MRPGIRKLVVLNPRAYKGGSGHTTFYLLI PKDIAEALDIKPDDTFILNMEQKDGDIVLSYKRVKE  
LKI

>3OA6A

MKKHHHHHMSASEGMKFKFHSGEKVLCEFPDPTKARVLYDAKIVDVIVGKDEKGRKIPEYLIHF  
NGWNRSWDRWAAEDHVL RDTDENRRLQRKLARKAVARLRSTGRKK

>3OD8H

MGSSHHHHHSSGLVPRGSHMAESSDKLYRVEYAKSGRASCKKCSSEI PKDSL RMAIMVQSPMFD  
GKVPHWYHFSCFWKVGHSIRHPDVEVDGFSELRWDDQQKVKKTAEAGGV TG

>3OKGA

MSHHHHHSM DIEFMTEGPYKLP PGWRWVRLGEVCLPTERRDPTKNPSTYFVYVDISAIDSTV GK

IVSPKEILGQHAPSRARKVIRSGDVI FATTRPYLKNIALVPPDLGQICSTGFCVIRANREFAEF  
 EFLFHLCRSDFITNQLTASKMRGTSYPAVTDNDVYNTLIPLPPLLEEQRRI VAKVEALMERVREVR  
 RLRAEAQKDELLMOTALAEVFPHPGADLPPGWRWVRLGEVCDI IMGQSPSSTYNFEGNGLPFF  
 QGKADFGDLHPTPRIWCSAPQKVARPGDVLSVRAPVVGSTNVANLACCIGRGLAALRPRDSLRF  
 WLLYYLHYLEPELSKMGAGSTFNAITKKDLQNVFIPLPPLLEEQRRI VAYLDQIQQVAALKRAQA  
 ETEAELKRLEQAILDKAFRGDL

>30LCX

MSRNDKEPFFVKFLKSSDNSKCFKKALESIKEFQSEEYLQIITEEEALKIKENDRSLYICDPFSG  
 VVFDHLKKGCRIVGPQVVI FCMHHQRCVPRAEHPVYNMVMSDVTISCTSLEKEKREEVHKYVQM  
 MGGRVYRDLNVSVTHLIAGEVGSKKYLVAANLKKPILLPSWIKTLWEKSQEKKITRYTDINMEDF  
 KCPIFLGCII CVTGLCGLDRKEVQQLTVKHGGQYMGQLKMNECTHLIVQEPKGQKYECAKRWNVH  
 CVTTQWFFDSIEKGFCDSESIYKTEPRPEALEHHHHHH

>30N0D

MPKIQTYVNNNVYEQITDLVTIRKQEGIEEASLSNVSSMLLELGLRVYMIQQEKREGGFNQMEYN  
 KLMLENVSRVRAMCTEILKMSVLNQESI ASGNFDYAVIKPAIDKFAREQVSIFFPDEDDQE

>3P7NB

MRGSHHHHHHGMASMTGGQQMGRDLYDDDDKDHFFTMGQDRPIDGSGAPGADDTRVEVQPPAQWV  
 LDLIEASPIASVSDPRLADNPLIAINQAFTDLTGYSSEECVGRNCRFLAGSGTEPWLTDKIRQG  
 VREHKPVLVEILNYKKDGT PFRNAVLVAPIYDDDELLYFLGSQVEVDDDQPNMGMARRERAAEM  
 LKTLSPRQLEVTTLVASGLRNKEVAARLGLSEKTVKMHRGLVMEKLNKTSADLVRIAVEAGI

>3P83F

GPLGSPEFPGRMLKAGIDEAGKGCVIGPLVVAGVACSDERLRKLGVKDSKKLSQGRREELAEI  
 RKICRTEVLKVS PENLDERMAAKTINEILKECYAEIILRLKPEIAYVDS PDVIPERLSRELEEIT  
 GLRVVAEHKADEKYPLVAAASIIAKVEREREIERLKEKFGDFGSGYASDPRTREVLKEWIASGRI  
 PSCVRMRWKT VSNLRQKTLDDF

>3P83C

MIDVIMTGELLKTVTRAI VALVSEAR IHFLEKGLHSRAVD PANVAMVIVDIPKDSFEVYNIDE EK  
 TIGVMDRIFDISK SISKDLVELIVEDESTLKVKFGSVEYKVALIDPSAIRKEPRIPELELPK  
 IVM DAGEFKKAI AAADKISDQVIFRS DKEGFRIEAKGDVDSIVFHMTETELIEFNGGEARSMFSV  
 DYLKEFCKVAGSGDLLTIHLGTNYPVRLVFELVGGRAKVEYILAPRIESE

>3P9AA

MAAPKGNRFWEARSSHGRNPKFESPEALWAACCEYFEWVEANPLWEMKAFSYQGEVIQEPIAKMR  
 AMTITGLTLFIDVTLETWR TYRLREDLSEVVTRAEQVIYDQKFSGAAADLLNANI IARDLGLKEQ  
 SQVEDVTPDKGDRDKRRSRIKELFNRGTGRDS

>3PGGB

SYKVNYS ETPANKSQGGSNQKGGNIILPLALIDKCI GNRIYVVMKGDKEFSGVLRGFDEYVNMV  
 LDDVQEQYGFKADEEDI SGGNKKLRVMVNRLETILLSGNNVAMLVPGGDPDSFNFS

>3POVA

GAMEATPTPADLFS EDYLVDTLDGLTVDDQQAVLASLSFSKFLKHAKVRD WCAQAKIQPSMPALR  
 MAYNYFLFSKVG EFIGSEDVCNFFVDRVFGGVRLLDVASVYAACSQMNAHQRRHICCLVERATSS  
 QSLNPFWDALRDGI I SSKFHWAVKQONT SKKIFSPWPI TNNHFVAGPLAFGLRCEEVKTLLAT  
 LLHPDETNC LDYGF MQSPQNGIFGVSLDFAANVKT DTEGRLQFDPNCKVYEIKCRFKYTFAKMEC  
 DPIYAAAYQRLYEAPGLALKDFFYSISKPAVEYVGLGKLPSESDYLVAYDQEW EACPRKRRKLT P  
 LHNLI RECILHNSTTESDVYVLTDPQDTRGQISIKARFKANL FVNVRRHSYFYQVLLQSSIVEEYI

GLDSGIPRLGSPKYYIATGFFRKRGYQDPVNCTIGGDALDPHVEIPTLLIVTPVYFPRGAKHRL  
HQAANFWSRSKDTFPYIKWDFSYSANVPHSP

>3PVPB

GPHMISAATIMAATAEYFDTTVEELRGPGKTRALAQSRQIAMYLCRELTDLSLPKIGQAFGRDHT  
TVMYAQRKILSEMAERREVFHDVKELTTRIRQRSKR

>3Q8DB

MEGWQRAFLHSRPWSETSLMLDVFTEESGRVRLVAKGARSKRSTLKGALQPFTPLLLRFGGRGE  
VKTLRSAEAVSLALPLSGITLYSGLYINELLSRVLEYETRFSEFFDYLHCIQSLAGVTGTPEPA  
LRRFELALLGHLGYGVNFTHCAGSGEPVDDTMTYRYREEKGFIVVIDNKTFTGRQLKALNARE  
FPDADTLRAAKRFTRMALKPYLGGKPLKSRELFRQFMPKRTVKTHYE

>3QMBA

MHHHHHSSRENLYFQGQIKRSARMCGECEACRRTEDCGHCDFCRDMKKFGGPNKIRQKCLRQC  
QLRARESYKYFPSS

>3QO2A

HMGEDVFEVEKILDMKTEGGKVLYKVRWKGYSDDDTWEPEIHLEDCKEVLLFRKKIAENKAK

>3QODB

SNAMSDVDLIKRLGPSAMDQIMLYLAFSAMRTSGHRHGAFDAAATAAKCAIYMTYLEQGQNL  
MTGHLHHLEPKRVKAIVEEVRQALTEGKLLKMLGSQEPRYLIQFPYVWMEKYPWRPGRSRI  
PGTSLTSEEKQIEQKLPNSLPDAHLITSEFLELIEFLHKRSQEDLPKEHQMPLSEALAEHIK  
RRLLYSGTVTRIDSPWGMFPYALTRPFYAPADDQERTYIMVEDTARFFRMRDWA  
EKRPNTMRVLEELDILPEKMQQAKDELDEIRAWADKYHQDDGVPVVLQMVFGKKED

>3QRFN

SSVPLEWPLSSQSGSYELRIEVQPKPHRAHYETEGSRGAVKAPTGGHPVVQLHGYMENKPLGLQ  
IFIGTADERILKPHAFYQVHRITGKTVTTSYEKIVGNTKVLEIPLPKNNMRATIDCAGILKLR  
NADIELRKGETDIGRKNTRVRLVFRVHIPESSGRIVSLQTASNPIECSQRS  
SAHELPMVERQDTSCLVYGGQQMILTGQNFTESEKVVFTTEKTTDGQQIWEMEATVAAAAA  
PNMLFVEIPEYRNKHIRT  
PVKVNIFYVINGKRKRSQPQHFTYHPV

>3QU3A

GSHMAEVRGVQRVLFGDWLLGEVSSGQYEGLOWLNEARTVFRVPWKHFGRRDLEEDAQIFKAWA  
VARGRWPPSGVNLPPPEAEAAERRERRGWKTNFRCALHSTGRFILRQDNSGDPVDPHKVYELSRE  
LGSTVGP

>3QVGD

MQEPPDLVPELPDFFEGKHFFLYGEFPGDERRRLIRYVTAFNGELEDRMNERVQFVITAQEWDP  
NFEEALMENPSLAFVRPRWIYSCNEKQKLLPHQLYGVVPPQA

>3QVGC

SNSADETLCQTKVLLDIFTGVRLYLPPSTPDFSRLRRYFVAFDGLVQEFDMTSATHVLGSRDKN  
PAAQQVSPewiwacIRKRRLVAPS

>3R0JB

GTHMRKGVLDLVTAGTPGENTTPEARVLVVDDEANIVELLSVSLKFQGFVYTATNGAQALDRARE  
TRPDAVILDVMPGMDGFGVLRRLRADGIDAPALFLTARDSLQDKIAGLTLGGDDYVTKPFSLEE  
VVARLRVILRRAGKGNKEPRNVRLTFADIELDEETHEVWKAGQPVSLSPTEFTLLRYFVINAGTV  
LSKPKILDHVWRYDFGGDVNVVESYVSYLRRKIDTGEKRLHHTLRGVGYVLRREPR

>3R4KA

GMGTVSKALTLTYFNHGRLEIGLSDLTRLSGMKNKATVYRLMSELQEAGFVEQVEGARSYRLGPQ

VLR L A A L R E A S V P I L S A S R R V L R E L S E D T G E T T H L S L L Q G E Q L A S L S H A Y S S R N A T K V M M E D A E V  
 L T F H G T A S G L A V L A Y S E P S F V D A V L A A P L T A R T P Q T Q T D P A A I R A E I A E V R R T G L A Q S I G G F E A E  
 V H S H A V P I F G P D R A V L G A L A V A A P T S R M T P D Q K R T I P P A L R A A G L S L T E R I G G A C P P E F P T D I A A  
 >3R C O A

E N L Y F Q G M L E G D L V S K M L R A V L Q S H K N G V A L P R L Q G E Y R S L T G D W I P F K Q L G F P T L E A Y L R S V P A  
 V V R I E T S R S G E I T C Y A M A C T E T A R

>3R H 2 A

G M K T R D K I I Q A S L E L F N E H G E R T I T T N H I A A H L D I S P G N L Y Y H F R N K E D I I R C I F D Q Y E Q H L L L G  
 F K P Y A D Q K V D L E L L M S Y F D A M F Y T M W Q F R F M Y A N L A D I L A R D D T L K A R Y L K V Q Q A V L E Q S I A V L N  
 Q L K K D G I L Q I E D E R I A D L A D T I K M I I G F W I S Y K L T Q S S I A T I S K A S L Y E G L L R V L M I F K A Y S T P D  
 S L A N F D R L E Q H F R S Q S N

>3R L O A

G S V D D S A Q S D L K E V M V L N A T E S F V Y E P K E Q K K M F H A T V A T E N E V F R V K V F N I D L K E K F T P K K I I A  
 I A N Y V C R N G F L E V Y P F T L V A D V N A D R N M E I P K G L I R S A S V T P K I N Q L C S Q T K G S F V N G V F E V H K K  
 N V R G E F T Y Y E I Q D N T G K M E V V V H G R L T T I N C E E G D K L K L T C F E L A P K S G N T G E L R S V I H S H I K V I  
 K T R K N A A A S

>3S 4 W B

S H N S H E V E E N G S V F V K L L K A S G L T L K T G E N Q N Q L G V D Q V I F Q R K L F Q A L R K H P A Y P K V I E E F V N G  
 L E S Y T E D S E S L R N C L L S C E R L Q D E E A S M G T F Y S K S L I K L L L G I D I L Q P A I I K M L F E K V P Q F L F E S  
 E N R D G I N M A R L I I N Q L K W L D R I V D G K D L T A Q M M Q L I S V A P V N L Q H D F I T S L P E I L G D S Q H A N V G K  
 E L G E L L V Q N T S L T V P I L D V F S S L R L D P N F L S K I R Q L V M G K L S S V R L E D F P V I V K F L L H S V T D T T S  
 L E V I A E L R E N L N V Q Q F I L P S R I Q A S Q S K L K S K G L A S S S G N Q E N S D K D C I V L V F D V I K S A I R Y E K T  
 I S E A W F K A I E R I E S A A E H K S L D V M L L I I Y S T S T Q T K K G V E K L L R N K I Q S D C I Q E Q L L D S A F S T H  
 Y L V L K D I C P S I L L L A Q T L F H S Q D Q R I I L F G S L L Y K Y A F K F F D T Y C Q Q E V V G A L V T H V C S G T E A E V  
 D T A L D V L L E L I V L N A S A M R L N A A F V K G I L D Y L E N M S P Q Q I R K I F C I L S T L A F S Q Q P G T S N H I Q D D  
 M H L V I R K Q L S S T V F K Y K L I G I G A V T M A G I M A E D R S V P S N S S Q R S A N V S S E Q R T Q V T S L L Q L V H S  
 C T E H S P W A S S L Y D E F A N L I Q E R K L A P K T L E W V G Q T I F N D F Q D A F V V D F C A A P E G D F P F P V K A L Y  
 G L E E Y S T Q D G I V I N L L P L F Y Q E C A K D A S R A T S Q E S S Q R S M S S L C L A S H F R L L R L C V A R Q H D G N L D  
 E I D G L L D C P L F L P D L E P G E K L E S M A K D R S L M C S L T F L T F N W F R E V V N A F C Q Q T S P E M K G K V L S R  
 L K D L V E L Q G I L E K Y L A V I P D Y V P P F A S V D L D T L D M M P R K T F V S L Q N Y R A F F R E L D I E V F S I L H S G  
 L V T K F I L D T E M H T E A T E V V Q L G P A E L L F L L E D L S Q K L E N M L T A P F A K R I C C F K N K G R Q N I G F S H L  
 H Q R S V Q D I V H C V V Q L L T P M C N H L E N I H N F F Q C L G A E H L S A D D K A R A T A Q E Q H T M A C C Y Q K L L Q V L  
 H A L F A W K G F T H Q S K H R L L H S A L E V L S N R L K Q M E Q D Q P L E E L V S Q S F S Y L Q N F H H S V P S F Q C G L Y L  
 L R L L M A L L E K S A V P N Q K K E K L A S L A K Q L L C R A W P H G E K E K N P T F N D H L H D V L Y I Y L E H T D N V L K A  
 I E E I T G V G P E L V S A P K D A A S S T F P T L T R H T F V I F F R V M M A E L E K T V K G L Q A G T A A D S Q Q V H E E K  
 L L Y W N M A V R D F S I L L N L M K V F D S Y P V L H V C L K Y G R R F V E A F L K Q C M P L L D F S F R K H R E D V L S L L Q  
 T L Q L N T R L L H H L C G H S K I R Q D T R L T K H V P L L K K S L E L L V C R V K A M L V L N N C R E A F W L G T L K N R D L  
 Q G E E I I S Q D P S S S E S N A E D S E D G

>3S 4 W A

M D L K I L S L A T D K T T D K L Q E F L Q T L K D D D L A S L L Q N Q A V K G R A V G T L L R A V L K G S P C S E E D G A L R R  
 Y K I Y S C C I Q L V E S G D L Q Q D V A S E I I G L L M L E V H H F P G P L L V D L A S D F V G A V R E D R L V N G K S L E L L  
 P I I L T A L A T K K E V L A C G K G D L N G E E Y K R Q L I D T L C S V R W P Q R Y M I Q L T S V F K D V C L T P E E M N L V V  
 A K V L T M F S K L N L Q E I P P L V Y Q L L V L S S K G S R R S V L D G I I A F F R E L D K Q H R E E Q S S D E L S E L I T A P  
 A D E L Y H V E G T V I L H I V F A I K L D C E L G R E L L K H L K A G Q Q G D P S K C L C P F S I A L L L S L T R I Q R F E E Q

VFDLLKTSVVKSFKDLQLLQGSKFLQTLVPQRTCSTMI LEVVRNSVHSDHVTQGLIEFGFILM  
 DSYGPKKILDGKAVEIGTSLSKMTNQHACKLGANILLETFKIHEMIRQEILEQVLNRVVTRTSSP  
 INHFLDLFSDIIMYAPLILQNC SKVTETFDYLTFLPLQTVQGLLKAVQPLLKISMSMRDSLILVL  
 RKAMFASQLDARKSAVAGFLLLLKNFKVLGSLPSSQCTQSIGVTQVRVDVHSRYSAVANETFCLE  
 IIDSLKRSLGQQADIRLMLYDGFYDVLRRNSQLASSIMQTLFSQLKQFYEPEDLLPPLKLGACV  
 LTQGSQIFLQEPLDHLSCIQHCLAWYKSRVVP LQQGDEGEEEEELYSELDDMLESI TVRMIKS  
 ELED FELDKSADFSQNTNVIKNNICACLIMGVCEVLMEYNFISISNFSKSKFEEILSLFTCYKKF  
 SDILSEKAGK GKAKMTSKVSDSLLSLK FVSDLLTALFRDSIQSHEESLSVLRSSG EFMHYAVNVT  
 LQKIQQ LIRTGHSVGPDPGQNPDKIFQNLCDITRVLWRYTS IPTSVEESGKKEKGSISLLCLEG  
 LQKTF SVVLQFYQPKVQQFLQALDVMGTEEEEAGVTVTQRASFQIRQFQRSLNLLSSEEDDFNS  
 KEALLLIAVLSTLSRLLLEPTSPQFVQMLS WT SKICKEYSQEDASFCKSLMNLFFSLHVLYKSPVT  
 LLRDL SQDIHGQLGDIDQDVEIEKTDHFAVNLRTAAPTVC LLVLSQA EKVLEEVDWLI AKIKGS  
 ANQETLSDKVPEDASSQAVPPTLLIEKAIVMQLGTLVTF FHELVTALPSGSCVD TLLKGLSKI  
 YSTLTAFVKYYLQVCQSSRGIPNTVEKLVKLSGSHLTPVCYSFISYVQNKSSDAPKCEKEKAAV  
 STTMAKVLRETKPIPNLVFAIEQYEF LLIQLSKKSKVNLMQHMKLSTSRDFKIKGSVLDMLVRED  
 EHHHHHH

>3S5RB

GMQATMTDKNTRELLLDAAATTLFAEQGIAATTMAEIAASVGVNPAMIHYFKTRDSLDDTIIEER  
 IGRIIDMIWE PVTGEEDDPLIMVRDLVNRI VNTCETMLWLP SLWIREIVNEGGALREKMLNNIPI  
 DKMNKFSAKIAEGQKQGVINSGIDSRLIGSII GLTMLPLATAKLRDQIPTMKGLSSEDIVCHVT  
 ALLFTGLTNPSNSDDIKKQRT

>3SIAA

MQPPVANFCLWNLQPIQGSWMGAACIYQMPPSVRNTWWFPLLNTIPLDQYTRIYQWFMGVDRDRS  
 GTLEINELMMGQFP GGIRLSPQTALRMMRIFDTDFNGHISFYEFMAMYKFMELAYNLFVMNARAR  
 SGTLEPHEILPALQQLGFYINQRTSLLLHRLFARGMAFCDLNCWIAICAFAAQTRSAYQMI FMNP  
 YYGPMKPFNPMEFGKFLDVVTSLLE

>3SQIA

MSKLD SLLKELPTRTAHLYRSIWHKYTEWLKTM PDLTGADLKLFLSQYIVKYIASHDDIAKDPL  
 PTC DAMIWFSRALDIENNDV LVLQQRLYGLVKLLEFDYSNVIAILQKISINLWNPSTDSLQSKHF  
 KTCQDKLKL LLD FQWKFN TNVS FEDRTTVSLKDLQCILDDENGKCGLAHSSKPNFVLPNFQSPF  
 TCPIFTMAVYYYYLRFHGVKKYKGDGYQILSQLEHIPIIRGKSLDQYPRELT LGNWYPTIFKYCQ  
 LPYTKKHWFQVNQEWPFQPDFSDSENTSTLAESDSENTIGIPDFYIEKMNR TKLQPCPQVHVHL  
 FPTDLPPDIQAVFDLLNSVLVTS LPLLYRVFPTHDI FLDP SLKTPQNI AFLTGLTLPDIESQEHL  
 LAQLIDKTGTVSELVNPVKIDQNEHTLTPIGTSLSQTDI PMLDQLKTELQKLIQLQTSTGFSQL  
 ITVLL EIFQR LDFKSNKQFVIDLLQSCRKDMRNKLM DPCSLSTNFADELSDDENEGNKGTGAIY  
 DPETDNGNEESVSD

>3SSCB

MESIQPWIEKFIKQAQQRSQSTKDYPTSYRNLRVKLSFGYGNFTSIPWFAFLGEGQEASNGIYP  
 VILYYKDFDELVLAYGISDTNEPHAQWQFSSDI PKTIAEYFQATSGVYPK KYGQSYAC SQKVSQ  
 GIDYTRFASMLDNIINDYKLIFNSGKSVI PPLEGH HHHHH

>3TB6B

GIDPFTSAKSALHSNKTIGVLT TYISDYIFPSIIRGIESYLSEQGYSM LLTSTNNNPDNERRGLE  
 NLLSQHIDGLIVEPTKSALQTPNIGYYLNLEKNGIPFAMINASYAELAAPSFTLDDVKGGMMAAE  
 HLLSLGTHMMGIFKADDTQGVKRMNGFIQAHRE RELFSPDMIVTFTTEEKESK LLEKVKATLE

KNSKHMPTAILCYNDEIALKVIDMLREMDLKVPEMDSIVGYDDSHFAQISEVKLTSVKHPKSVLG  
KAAAKYVIDCLEHKKPKQEDVIFEPELIIRQSARKLNE

>3TEDA

GPDMDSIGESEVRALYKAILKFGNLKEILDELIADGTLPVKSFKEYGETYDEMMEAAKDCVHEEE  
KNRKEILEKLEKHATAYRAKLKSGEIKAEHQPKDNPLTRLKREKKAVLFNFKGVKSLNAESL  
LSRVEDLKYLNKLNINSNYKDDPLKFSLGNNTPKPVQNWSSNWTKEEDEKLLIGVFKYGYGSWTQI  
RDDPFLGITDKIFLNEVHNPVAKKSASSSDTTPTPSKKGGITGSSKKVPGAIHLGRRVDYLLSF  
LRGGLNTKSPS

>3TEKB

MGEELREEERGEVRSELITKGEKKLVLRWNTGKTSAGRLFGRYGPGRPEFFKLLFGAVAGSLR  
EQFGPDGENIFNRIRDSEKFRETSRELFDGLKKWFFEEAVPRYNLERGDI FMISTELVLDPDTGE  
LLWNRDKTQLIYWIRSDR

>3THOB

MKILHTSDWHLGVTSSRPVDRREELKKALDKVVEEAEREVDLILLTGDLLHSRNNPSVVAL  
HDLLDYLKRMRTAPVVVLPGNQDWKGLKLFGNFVTSISSDITFVMSFEPVDVEAKRGQKVRILP  
FPYPDESEALRKNEGDFRFFLESRLNKLYEEALKKEDFAIFMGHFTVEGLAGYAGIEQGREI IIN  
RALIPSVVDYAALGHIHSFREIQKQPLTIYPGSLIRIDFGEEADEKGAVFVELKRGEPFRYERID  
ASPLPLKTLTYKKIDTSALKSIRDSCRNFPGYVRVVEEDSGILPDLMGEIDNLVKIERKSREI  
EEVLRSPPEEFKEELDKLDYFELFKEYLKKREENHEKLLKILDELLDEVKKSEA

>3THOA

HHHHHHSSGENLYFQGHMRPERLTVRNFLGLKNVDIEFQSGITVVEGPNAGKSSLFEAISFALF  
NGGIRYPNSYDYVNRNAVDTARLVFQFERGGKRYEIIREINALQRKHNAKLSEILENGKAAIA  
AKPTSVKQEVKILGIEHRTFIRTVFLPQGEIDKLLISPPSEITEIISDVFQSKETLEKLEKLLK  
EKMKKLENEISSGGAGGAGGSLEKLLKEMSDEYNNLDLLRKYLFDKSNFSRYFTGRVLEAVLKRT  
KAYLDILTNGRFDIDFDEKGGFI IKDWGIERPARGLSGGERALISISLAMSLAEVASGRDAFF  
IDEGFSSLC TENKEKIASVLKELERLNKVIVFITCDREFSEAFDRKLRTGGVVVNE

>3THWD

CCTCTATCTGAAGCCGATCGATGAAGCATCGATCGCACAGCTTCAGATAGAGG

>3TOCB

GSFTMNLNFSLLDEPIPLRGGTILVLEDVCVFSKIVQYCYQYEEDESELKFFDHKMKTIKESIML  
VTDILGFDVNSSTILKLIHADLESQFNEKPEVKS MIDKLVATITELIVFECLLENELDLEYDEITI  
LELIKSLGVKQVETQSDTIFEKCLEILQIFKYLTKKKLLIFVNSGAF LTKDEVASLQEYISLTNLT  
VLFLEPRELYDFPQYILDEDYFLITKNMV

>3TRBB

SNAMAANRMRPIHPGEILAEELGFLDKMSANQLAKHLAIPNTRVTAI LNGARSITADTALRLAKF  
FGTTPEFWLNLQDAYDIKMALKKSGKKIEKEVTPYDQAA

>3TUOD

GPGSGTMLPVFCVVEHYENAI EYDCKEEHAEFVLVRKDMFLNQLIEMALLSLGYSHSSAAQAKGL  
IQVGKWNPVPLSYVTDAPDATVADMLQDVYHVVT LKIQH

>3U50C

QRIYSSIEEIIQQAQASEIGQKKEFYVYGNLVS IQMKNKLYYYRCTCQGKSVLKYHGDSFFCESC  
QQFINPQVHMLRAFVQDSTGTIPVMI FDQSSQLINQIDPSIHVQEAGQYVKNCIENGQEEIIR  
QLFSKLD FARFIFEIQFENKEFNNEQEIAYKVLKIEKENIKE

>3U58A



GSLSDQLSKQTLISQLQVGNRFSFKFEGRVVYKSSTFQNNQDSKYFFITAQDANNQEINLSFW  
 QKVDQSYQTLKVGQYFFIGGEVKQFKNNLELKFKFGDYQIIPKETLGGSGGSTLLISEVLKTSK  
 QYLSVLAQVVDIQSSDKNIRLKI CDNSCNQELKVVI FPDLCYEWDRKFSINKWYFNEFVRQIYN  
 DEVQLKNNIHSSIKESDD

>3U5ZF

MKLSKDTTALLKNFATINSGIMLKSGQFIMTRAVNGTTYAEANISDVIDFDVAIYDLNGFLGILS  
 LVNDDAEISQSEDNKIADARSTIFWPAADPSTVVAPNKPIPFVAVASAVTEIKAEDLQQLLRVS  
 RGLQIDTIAITVKEGKIVINGFNKVEDSALTRVKYSLTLGDYDGENTFNFIINMANMKMQPGNYK  
 LLLWAKGKQGAAKFEGEHANYVVALEADSTHDF

>3U5ZA

SLFKDDIQLNEHQVAVYSKDWTAVQSAADSFKEKAENEFFEIIGAINNKTKCSIAQKDYSKFMVE  
 NALSQFPECMPAVYAMNLIGSGLSDEAHFNYLMAAVPRGKRYGKWAKLVEDSTEVLIIKLLAKRY  
 QVNTNDAINYKSILTKNGKLPVLKELKGLVTDDFLKEVTKNVKEQKQLKLLALEWGLEHHHHHH  
 HHHH

>3U5ZM

GPGGSMITVNEKEHILEQKYRPSTIDECILPAFDKETFKSITSKGKIPHIILHSPSPGTGKTTVA  
 KALCHDVNADMMFVNGSDCKIDFVRGPLTNFASAASFDRQKVIVIDEFDRSGLAESQRHLRSFM  
 EAYSSNCSIIITANNIDGIIKPLQSRVITFGQPTDEDKIEMMQMIRRLTEICKHEGIAIADM  
 KVVAALVKNFPDFRKTIGELDSYSSKGVLDAGILSLVTNDRGAI DDVLESLKNKDVKQLRALAP  
 KYAADYSWVFGKLAEEIYSRVTPQSIIRMYEIVGENNQYHGIAANTELHLAYLFIQLACEMQWK

>3ULJA

GSDPQVLRGSGHCKWFNVRMGFGFISMTSREGSPLENPVDFVHQSCLYMEGFRSLKEGEPVEFT  
 FKKSSKGFESLRVTGPGGNPCLGNE

>3ULXA

MGMRRERDAEAEENLPPGFRFHPTDDELVEHYLCRKAAGQRLPVPIIAEVDLYKFDPWDLPERAL  
 FGAREWYFFTPRDRKYPNGSRPNRAAGNGYWKATGADKPVAPRGRTLGIKKALVIFYAGKAPRGVK  
 TDWIMHEYRLADAGRAAAGAKKGSRLRDDWVLCRLYNKKNEWEK

>3UWXB

MGSSHHHHHSSGLVPRGSHMGPKKVEGRFQLVSPYEPQGDQPQAI AKLVDGLRLGVKHQTL LGA  
 TGTGKTFTISNVIAQVNKPTLVIAHNKTLAGQLHSELKEFFPHNAVEYFVSYDYDYQPEAYVPQT  
 DTYIEKDAKINDEIDKLRHSATSALFERRDVIIVASVSCIYGLGSPEEYRELVVSLRVGMEIERN  
 ALLRRLVDIQYDRNDIDFRRGTFRVRGDVVEIFPASRDEHCIRVEFFGDEIERIREVDALTGEVL  
 GEREHVAIFPASHFVTREEKMLAIQNI EQELEERLAE LRAQ GKLL EAQRLEQRTRYDLEMMREM  
 GFCSGIENYSRHLALRPPGSTPYTLLDYFPDDFLIIVDESHVTL PQLRGM YNGDRARKQVLVDHG  
 FRLPSALDNRPLTFEEFEQKINQIIYISATPGPYELEHSPGVVEQIIRPTGLLDPTIDVRPTKGQ  
 IDDLIGE IHERVERNERTLVTTLTKKMAEDLTDYLKEAGIKVAYLHSEIKTLERIEIIRDLRLGK  
 YDVLVGINLLREGLDIPVSLVAILDADKEGFLRSERSLIQTIGRAARNANGHVIMYADTITKSM  
 EIAIQETKRRRAIQEEYNRKHGIVPRTVKKEIRDVIRATYAAEETEMYEAKPAAAMTKQEREELI  
 RKLEAEMKEAAKALDFERAAQLRDIIFELKAEG

>3V20B

MTTNLTNSNCVEEYKENGKTKIRIKPFNALIELYHHQTP TGSIKENLDKLENYVKDVVKAKGLAI  
 PTSGAFSNTRGTWFEVMIAIQSWNYRVKRELNDYLI IKMPNVKTFDFRKIFDNETREKLHQLEKS  
 LLTHKQQVRLITSNPDLIIIRQKDLIKSEYNLPINKLTHENIDVALTLFKDIEGCKWDSLVAGV  
 GLKTSLRPDRRLQLVHEGNILKSLFAHLKMAYWNPKAEFKYYGASSEPVSKADDDALQTAATHTI

VNVNSTPERAVDDIFSLTSFEDIDKMLDQIIKK

>3V4GA

MHHHHHSSGVDLGTENLYFQSNAMPSEKQDNLVRAFKALLKEERFGSQGEIVEALKQEGFENI  
 NQSKVSRMLTKFGAVRTRNAKMEMVYCLPTELGVPTVSSSLRELVLVDVHDNQALVVIHTGPGAAQ  
 LIARMLDSLKGSEGILGVVAGDDTIFITPTLTITTEQLFKSVCELFYAG

>3V60A

GSHMRPETHINLKVSDGSSEIFFKIKKTTPLRRLMEAFAKRQKEMDSLRFlyDGIRIQADQTPE  
 DLDMEDNDIIEAHREQIGG

>3V62C

SHNPDDTTVDNRPIISNAKFLADAAMKKTQKFSKVKVNEPASSQMDIFSQLSRAKKKSKLNNGEI  
 IVID

>3V68A

MIERILEFTAKHEEWIVGENVEDFTNENIAMFLSRVSNVSSKIPGYLGEKIDVNGLLSIKIEGS  
 LEEKLKALISPKVSRQIGRLVMEDDKLKLLEVEKAVLTREILKNELPIEFPGKIEGLKIQP  
 RYEEDHINFRTARYGSWIVVKRMIIDEKTPLLDIARLLASINETAVNKIKDFADVDDKIVEYFGG  
 FKKVKKEEIKEIVQLFREFKGNEFEVRYAAREMLSKLGLKVDVPSKNLEKYLEKAG

>3V72A

MSKRKAPQETLNGGITDMLVELANFEKNVSQAIHKYNAYRKAASVIKYPHKIKSGAEAKKLPV  
 GTKIAEKIDEFLATGKLRKLEKIRQDDTSSSINFLTRVTGIGPSAARKLVDEGIKTLEDLRKNE  
 KLNHHQRIGLYFEDFEKRIPREEMLQMQDIVLNEVKKLDPEYIATVCGSFRRGAESSGDMVLL  
 THPNFTSESSKQPKLLHRVVEQLQKVRFITDTLSKGETKFMGVCQLPSENDENEYPHRRIDIRLI  
 PKDQYYCGVLYFTGSDIFNKNMRAHALEKGFINKYTI RPLGVTGVAGEPLPVDSEQDIFDYIQW  
 RYREPKDRSE

>3V9RD

MLSKEALIKILSQNEGGNDMKIADEVVPMIQKYLDIFIDEAVLRSLQSHKDINGERGDKSPELS  
 HQDLERIVGLLLMDMLEHHHHHH

>3V9RC

MNDDDEDRAQLKARLWIRVEERLQQVLSSEDIKYTPRFINSLELALYLQLGEMGSDLQAFARHAGR  
 GVVNKSDMLYLRKQPDLOQERVTOE

>3VEAA

MKYQQLLENLESGWKWAYLVKKHREGEAITRHIENSAAQDAVEQLMKLENEPVKVQEWIDAHMNVN  
 LATRMKQTI RARRKRHFNAEHQHTRKKSIDLEFLVWQRLAVLARRRGNTLSDTVQVQLIEDAERKE  
 KYASQMSSLKQDLKDILDKEV

>3VH5W

GYRRTVPRGTLRKI IKKHKPHLRLAANTDLLVHLSFLLFLHRLAEEARTNAFENKSKI IKPEHTI  
 AAAKVILKKS RG

>3VH5A

GSEAAAGGEQRELLIQRLRAAVHYTTGALAQDVAEDKGVLFQTVAAI SEITFRQAENFARDLEM  
 FARHAKRSTITSEDVKLLARRSNSLLKYITQKSDELASSNMEQKEKKKKSSAAKGRKTEENETP  
 VTESEDSNMA

>3VIBA

MRKTKTEALKTKEHMLAALETFYRKGIARTSLNEIAQAAGVTRDALYWHFKNKEDLFDALFQRI  
 CDDIENCIAQDAADAEGGSWTVFRHTLLHFFERLQSNDIHYKFHNILFLKCEHTEQNAAVIAIAR  
 KHQAIWREKITAVL TEAVENQDLADDLKETAVIFIKSTLDGLIWRWFSSGESFDLGKTAPRIIG

IMMDNLENHPCLRRK

>3VK0C

MMGNKLTLPaelPDEQDLRAVLAYNMRLFRVnkGWSQEELARQCGLDRtyVSAVERKRWNIALSN  
IEKMAAALGVAAYQLLLPPQERLKLMTNSADTRQMPSESGILEHHHHHH

>3VPRD

VTTTRDRILEEAAKLFTEKGYEATSVQDLAQALGLSKAALYHHFGSKEEILYEISLLALKGLVAA  
GEKALEVADPKEALRRFMEAHARYFEENYPFFVTMLQGIKSLSPENRLKTIALRDRHEENLRAIL  
RRGVEQGVFREVDVALAGRAVLsMLNWMIRWFRPDGPMRAEEVARAYHDLILRGLERGSa

>3VW4A

MGHHHHHHHRNYHLFEKVRKWAYRAIRQGWPFVFSQWLDAVIQRVEMYNASLPVPLSPAECRAIGKS  
IAKYTHRKFSPegfSAVQAARGRKGgTKSKRAAVPTSARS LKPWEALGISRATYYRKLKCDPD

>3VZHA

GHMYRSRDFYVRVSGQRALFTNPATKGGSERSSYSVPTRQALNGIVDAIYYKPTFTNIVTEVKVI  
NQIQTElQGVrALLHDYSADLSYVSYSLSDVVYLKfHFVWNEDRKDLNSDRLPAKHEAIMERSIR  
KGGRRDVFLGTRECLGLVDDISQEEYETTvsYyngVNI DLGIMFHSFAYPKDKKTPLKSYFTKTv  
MKNGVITfKAQSECDIVNTLSSyAFKAPEEIKSVNDECMeyDAMEKGEN

>3W03B

SGMEELEQGLLMPAWLQLAENSLAKVFITKQGYALLVSDLQQVWHEQVDTSVVSQRAKELNK  
RLTAPPAAFLCHLDNLLRPLLKDAHPSEATFSCDCVADALILRVRSELSGLPFYWNFHCLASP  
SLVSQHLIRPLMGMSLALQCQVRELATLLHMKDLEIQDYQESGATLIRDRLKTEPFEEENSFLEQF  
MIEKLPEACSIGDGKPFVMNLQDLYMAVTTQEVQVGQKHQ

>3W3WB

PRRRTVGMKSSQGNVPTGNKQSVGKSAKISKPLHIKTSAYQKQYKINLETKARPSAGDEDSAHPD  
KNKE

>3W3WA

MSALPEEVNRTLLQIVQAFASPDNQIRSVAEKALSEEWITENNIEYLLTFLAEQAAFSQDTTVAA  
LSAVLFRKlALKAPITHIRKEVLAQIRSSLLKGFLSERADSIRHKLSDAIAECVQDDLPAWPELL  
QALIESLKSgNPNFRESSFRILTTVPYlITAVDINSILPIfQSGFTDASDNVKIAAVTAFVGYFK  
QLPKSEWSKLGILLPSSLNSLPRFLDDGKDDALASVFESLIELVELAPKLFKDMFDQIIQFTDMV  
IKNKDLEPPARTTALELLTVFSENAPQMCKSNQNYGQTLVMVTLIMMTEVSI DDDDAEWIESDD  
TDDEEEVtyDHARQALDRVALKLGGEYLAAPLFQYLQQMITSTEWRRERFAAMMALSSAAEGCADV  
LIGEIPKILDMVIPLINDPHPRVQYGCCNVLGQISTDFSPFIQRTAHDRI LPALISKLTSECTSR  
VQTHAAAALVNFSEFASKDILEPYLDSLLTNLLVLLQSNKLYVQEALTTIAFIAEAAKNKFIKY  
YDTLMPLLLNVLKVNNKDNSVLKKGKMECATLIGFAVGKEKfHEHSQELISILVALQNSDIDEDD  
ALRSYLEQSWSRICRILGDDFVPLLPIVIPLLITAKATQDVGLIEEEEEANFQQYPDWDVVQVQ  
GKHIAIHTSVLDDKVSAMELLQSYATLLRGQFAVYVKEVMEEIALPSLDFYLHDGVRAAGATLIP  
ILLSCLLAATGTQNEELVLLWHKASSKLIGGLMSEPMPEITQVYHNSLVNGIKVMGDNCLSEDQL  
AAFTKGVSANLTDTYERMQDRHGDGDEYNENIDEEEDFTDEDLLDEINKSIAAVLKTtNGHYLKN  
LENIWPMINTFLLDNEPILVIFALVVIGDLIQYGGEQTASMKNAFIPKVTECLISP DARIRQAAS  
YIIGVCAQYAPSTYADVCIPTLDTLVQIVDFPGSKLEENRSSTENASAAIAKILYAYNSNIPVD  
TYTANWFKTLPTITDKEAASFNYQFLSqliENNSPIVCAQSNISAVVDSVIQALNERSLTEREQQ  
TVISSVKLLGLFLPSSDAMAI FNRYPADIMEKVHKWFA

>3WE2B

GPLGSKTKDYKTRDVTDDVKSIVRFVQEHSSSQGMRNIKHVGPSGRFTMNMLVDIFLGSKSAKIQ

SGIFGKGSAYS SRHNAERLFK KLI LDKILDEDLY INANDQAIAYVMLGNKAQT VLNGLNKVDFMET  
ENSSSVKKQKALVAKVS

>3ZLJD

PNAAATQVDGTQMSLLSVPEETS PAVEALENLDPRS LTPRQALEWIYRLKSLV

>3ZQJA

MGHHHHHHHHSSGHIEGRHMADRLIVKGAREHNLSVDL DLPRDALIVFTGLSGSGKSSLAFD  
TIFAEGQRRYVESLSAYARQFLGQMDKPDVDFIEGLSPA VSIDQKSTNRNPRSTVGTITEVYDYL  
RLLYARAGTPHCPTCGERVARQTPQQIVDQV LAMPEGTRFLV LAPVVRTRKGEFADLFDKLN AQG  
YSRVRVDGVVHPLTDPPK LKKQEKHDIEVVVDRLTVKAAAKRRLTDSVETALNLADGIVVLEFVD  
HELGAPHREQRFSEKLACPNGHALAVDDLEPRSF SFNSPYGACPECSGLGIRKEVDPELVVDPD  
RTL AQGAVAPWSNGHTAEYFTRMMAGLGEALGFVDVTPWRKLP AKARKAILEGADEQVHVRYRNR  
YGRTRSYYADFEGLVLAFLQRKMSQTESEQMKERYEGFMRDVPCPVCAGTRLKPEILAVTLAGESK  
GEHGAKSIAEVCELSIADCADFLNALT LGPREQAIAGQVLKEIRSRLGFLLDV GLEYLSLSRAAA  
TLSGGGEAQRIRLATQIGSGLVGVLYVLDEPSIGLHQ RDNRRLIETLTRLRDLGNTLIVVEHDEDT  
IEHADWIVDIGPGAGEHGGRIVHSGPYDELLRNKDSITGAYLSGRESIEI PAIRRSVDPRRQLTV  
VGAREHNLRGIDVSFPLGVLT SVTVGVS GSKSTLVNDI LAAVLANRLNGARQV PGRHTRVTGLDY  
LDKLV RVDQSPIGRT PRSNPATYTG VFDKIRT LFAATTEAKVRGYQPGRFSFNVKGRCEACTGD  
GTIKIEMNFLPDVYVPC EVCQGARYNRETLEVHYK GKTVSEVLDMSIEEAAEFFEPIAGVHRYLR  
TLVDVGLGYVRLGQPAP TLSGGEAQRVKLASELQKRSTGR TVYILDEPTTGLHFDDIRKLLNVIN  
GLVDKGN TVIVIEHNLDVIKTSDWIIDLGPEGGAGGGTVVAQGT PEDVA AVPAS YTGKFLAEVVG  
GGASAATSR SNRRRN VSA

>4A0AA

MHHHHHHVDENLYFQGGGRMSYNYVVTAQKPTAVNGCVTGHFTSAEDLNLLIAKNTRLEIYVVTA  
EGLRPVKEVGMYGKIAVMELFRPKGESKDLLFIL TAKYNACILEYKQSGESIDIITRAHGNVQDR  
IGRPSETGIIGIIDPECRMIGLRLYDGLFKVIPLDRDNKELKAFNIRLEELHVIDVKFLYGCQAP  
TICFVYQDPQGRHVKTIEVSLREKEFNKGPWKQENVEAEAS MVI AVPKPFGGAI IIGQESITYHN  
GDKYLAIAPPIIKQSTIVCHNRVDPNGSR YLLGDMEGR LFM LLEKEEQMDGTVTLKDLRVELLG  
ETSIAECLTYLDNGVVFVGSRLGDSQLVKLN VDSNEQGSYV VAMETFTNLGPIVDMCVVDLERQG  
QGQLVTC SGAFKEGSLRIIRNGIGIHEHASIDLPGIKGLWPLRSDPNRETDDTLVLSFVGQTRVL  
MLNGEEVEETELMGFVDDQQTFFCGNV AHQQLIQITSASVRLVSQEPKALVSEWKEPQAKNISVA  
SCNSSQVVAVGRALYYLQIHPQELRQISHTEMEHEVA CLDITPLGDSNGLSPLCAIGLWTDISA  
RILKLP SFELLHKEMLGGEIIPRSILMTTFESSHYLLCALGDGALFYFGLNIETGLLSDRKKVTL  
GTQPTVLR TFRSLSTTNV FACSDRPTVIYSSNHKLVFSNVNLKEVNYMCP LNSDGYPDSLALANN  
STLTIGTIDEIQKLHIRT VPLYESPRKICYQEV SQCFV LSSRIEVQDTSGGTTALRPSASTQAL  
SSSVSSSKLFSSTAPHETSFGEEVEVHNLLIIDQHTFEVLHAHQFLQNEYALS LVSCCKLGKDPN  
TYFIVGTAMVYPEEAEPKQGRIVVFQYSDGKLQTVAEKEVKGAVYSMVEFNGKLLASINSTVRLY  
EWTTEKELRTECNHYNNIMALY LKTKGDFILVGDLMRSV LLLAYKPMEGNFEEIARDFNPNWMSA  
VEILDDDNFLGAENAFNLFVCQKDSAATTDEERQHLQEVGLFHLGEFVNVFCHGSLVMQNLGETS  
TPTQGSVLFGTVNGMIGLVTSLSES WYNLLLDMQNRLNKVIKSVGKIEHSFWRSFHTEKTEPAT  
GFIDGD LIESFLDISRPKMQEVVANLQYDDGSGMKREATADDLIKVVEELTRIH

>4A11B

MLGFLSARQTGLEDP LRLRRAESTRRVLGLEL NKDRDVERIHGGGINTLDIEPVEGRYMLSGGSD  
GVIVLYDLENSSRQSYTCKAVCSIGRDHPDVHRYSVETVQWYPHDTGMFTSSSFDKTLKVWDTN  
TLQTADVFNFEETVYSHHMSPVSTKHCLVAVGTRGPKVQLCDL KSGSCSHILQGHRQEILAVSWS

PRYDYILATASADSRVKLWDVRRASGCLITLDQHNGKKSQAVESANTAHNGKVNGLCFTSDGLHL  
 LTVGTDNRMRLWNSSNGENTLVNYGKVCNNSKKGLKFTVSCGCSSEFVFPYGSTIAVYTVYSGE  
 QITMLKGHYKTVDCCVFQSNFQELYSGSRDCNILAWVPSLYEPVPDDDETTTKSQLNPAFEDAWS  
 SSDEEGGTSAWSHPQFEK

>4ACOA

MRSSILFLLKLMKIMDVQQQEQEAMSSSEDRFQELVDSLKPRTAHQYKTYTYKYIQWCQLNQIIPTP  
 EDNSVNSVPYKDLPI SAELIHWFLDLTLITDDKPGEKREETEDLDEEEENSFKIATLKKIIGSLN  
 FLSKLCVHENPNANIDTKYLESVTKLHHTWIDSQKAITTNETNNTNTQVLCPLLKVS LNWNP  
 ETNHLSEKFFKTCSEKLRFLVDFQLRSYLNLSFEERSKIRFGSLKLGKRDRDAIYHKVTHSAEK  
 KDTPGHHQLLALLPQDCPFICPQTTLAAYLYLRFYGI PSVSKGDGFPNLNADENGSLQDIPILR  
 GKSLTTYPREETFSNYTTVFRYCHLPYKRREYFNKCNLVYPTWDEDTFRTFNEENHGNWLEQP  
 EAFAFPDKIPDFDKIMNFKSPYTSYSTNAKKDPFPPPKDLLVQIFPEIDEYKRHDYEGLSQNSR  
 DFLDLMEVLRERFLSNLPWIYKFFPNHDI FQDPIFGNSDFQSYFNDKTIHSGSPILSFDILPGF  
 NKIYKNKTNFYSLLIERPSQLTFASSHNPDTHTPQKQESEGPLQMSQLDTTQLNELLLKQQSFYEV  
 QFQTL SNFQILLSVFNKIFEKLEMKKSSRGYILHQLNLFKITLDERIKKSKIDDADKFIRDNQPI  
 KKEENIVNEDGPNTRSRTKRPKQIRLLSIADSSDESSTEDSNVFKKDGESIEDGAYGENEDENS  
 EMQEQKSMINELINSKISTFLRDQMDQFELKINALLDKILEEKVTRIEQKLGSHGTGKFTLKR  
 PQLYMTEEHNVGFDMEVPKKLRTSGKYAETVKDNDHDQAMSTTASPSPEQDQEAQSYTDEQEFML  
 DKSIDSIEGII LEWFTPNAKYANQCVHSMNKSNGKSWRANCEALYKERKSIVEFYIYLVNHESLD  
 RYKAVDICEKLRDQNEGSFSRLAKFLRKWRHDHQNSFDGLLVYLSN

>4AD8A

GIDPFTMTRKARTPKAAPVPEAVAVVEPPPPDAAPTGPRLSRLEIRNLATITQLELELGGGFCAF  
 TGETGAGKSIIVDALGLLLGGGRANHDLIRSGEKELLVTGFWGDGDESEADSASRRLLSSAGRGAAR  
 LSGEVVSRELQEWAOGRLLTIHWQHSVLSLLSPANQRGLLDRRVTKEAQAYAAAHAAWREAVSRL  
 ERLQASQRERARQIDLLAFQVQEISEVSPDPGEEEGINTELSRLSNLHESKHPSTSLVPRGSGSA  
 ADPEALDRVEARLSALSCLKNKYGPTLEDVVEFGAQAAEELAGLEEDERDAGSLQADVDALHAEL  
 LKVGQALDAAREREAEPVDSLLAVIRELGMPHARMEFALSALAEPAAYGLSDVLLRFSANPGEE  
 LGPLSDVASGGELSRVMLAVSTVLGADTPSVVFDEVDAGIGGAAAI AVAEQLSRLADTRQVLVVT  
 HLAQIAARAHHYKVEKQVEDGRTVSHVRLLTGDERLEEIARMLSGNTSEAALEHARELLAG

>4ATKB

ANIKRELTACIFPTESEARALAKERQKKDNHNLIERRRRNINDRIKELGTLPKSNPDMRWNK  
 GTILKASVDYIRKLQREQQRAKDLENRQKKLEHANRHLLLRVQELEMQARAHG

>4BHXB

GHMTDSEFFHQFRNLIYVEFVGPRTLIKLRNLCLDWLQPETRTKEEII ELLVLEQYLTIIPEK  
 LKPWVRACKPENCKLVTLLENYKEMYQP

>4BJ1A

GGGRVDHVFYQKFKSMALQELGTNYLSISYVPSLSKFLSKNLRSMKNCIVFFDKVEHIHQYAGID  
 RAVSETLSLVDINVVI IEMNDYLMKEGIQSSKSKECIESMGQASYSGQLDFEASEKPSNHTSDLM  
 MMVMRKINNDESIDHIVYFKFEQLDKLSTSTII EPSKLTETINVLSVLEKSNNIAFKVLIYSNNV  
 SISSLLSTSLKKLNTKYTVFEMPILTCAQEQEYLLKMKI KFTFDGSKLLQSYNSLVTCLNNKE  
 SNLAIFFEFKLVFPHFPTYLFNAYTEIIVQSRTFDELDDKIRNRLTIKNYPHSAYNFKK

>4BJIA

GAMGKGQCRVWIITTNMGVESVPTCRHSLGEPSTIQEVIEALKPLFEKRPVWTRRALLNHLDP  
 SYTHYLKFAIPYLSYLWTS GPFRTDYTRFGYDPRKDSNAAAAYQALFFKLLKNGKHKGTKTHVFDG

KTLFPTNRVYQVCDIVDPTIAPLLKDTQLRSECHRDTGWYRSGRYKVRDLRMREKLFALIEGEMP  
SEVAVNMILNAEEVEESDRY

>4BJXA

GSSHHHHHHSSSMNPPPPETSNPKNPKRQTNQLQYLLRVVLKTLWKHQFAWPFQOPVDAVKLNLP  
DYYKI IKT PMDMGT I KKRLENNYYWNAQECIQDFNTMFTNCYIYNKPGDDIVLMAEAELEKLFLOK  
INELPTEEQELVVTIPNSHKKGA

>4DAPA

MEFSPPLQRATLIQRYKRFLADVITPDGRELTLHCPNTGAMTGCATPGDVTWYSTSDNTKRKYPH  
TWELTQSQSGAFICVNTLWANRLTKEAILNESISELSGYSSLKSEVKYGAERSRIDFMLQADSRP  
DCYIEVKSVTLAENEQGYFPDAVTERGQKHLRELMVAEAGQRAVIFFAVLHSAITRFS PARHID  
EKYAQLLSEAQQRGVEILAYKAEISAEGMALKKSLPVTL

>4DFCC

GPHMASALVMKKGQRLSRDALRTQLDSAGYRHVDQVMEHGEYATR GALLDLFPMGSELPYRLDF  
DDEIDSLRVFDVDSQRTLEEVEAINLLP

>4DG7H

MGSSHHHHHHSSGLVPRGSHMSNFVNLDIFSNYQKYIDNEQEVRENIRIVVREIEHLSKEAQIKL  
QIIHSDLSQISAACGLARKQVELCAQKYQKLAELVPAGQYYRYSDHWTFITQRLIFIIALVIYLE  
AGFLVTRETVAEMLGLKISQSEGFHLDVEDYLLGILQLASELSRFATNSVTMGDYERPLNISHFI  
GDLNTGFRLNLKNDGLRKRFDALKYDVKKIEEVVYDVSIRGLSSKEKDQOQEEPVPATE

>4DHXF

MVVS KMNKDAQMRAAINQKLIETGERERL KELLRAKLI ECGWKDQLKAHCKEVIKEKGLEHVTVD  
DLVAEITPKGRALVPDSVKKELLQRI RTFLAQHASL

>4DHXD

GSLVLSELSQGLAVELMERVMMEFVRETCSQELKNAVETDQVRVVARCCEDVCAHLVDLFLVEEI  
FQTAKETLQE

>4DKYB

MNKAELIDVLTQKLGSDRRQATAAVENVVDTIVRAVHKGDSVTITGFGVFEQRRRAARVARNPRT  
GETVKVKPTSVPAPFRPGAQFKAVVSGAQRLPAEGPHHHHHH

>4DRAE

GSHMEGAGAGSGFRKELVSRLHLHLFKDDKTKVSGDALQLMVELLKV FVVEAAVRGVRQAQaeda  
LRVDVDQLEKVL PQLLLDF

>4DRBI

GSIFS YRDGMRQSS LKKDWFLSEEEFKLWNRLYRLRDSDEIKEITLPQVQFSSLQNEENKPAQES  
TTGIHQLSLSEWRLWQDHPLPTHQVDHSDRCRHF IGLMQMIEGMRHEEGECSYELEVESYLQMED  
VTSTFIAPRNE

>4DWPA

MGSSHHHHHHSSGLVPRGSHMLAAKRKTKTPVLVERIDQFVGQIKEAMKSDDASRNKIRDLWDA  
EVRYHFDNGRTEKTLELYIMKYRNALKA EFGPKSTPLAICNMKKLRERLNTYIARGDYPKTG VAT  
SIVEKIERAEFNTAGRKPTVLLRIADFIAMNGMDAQDMQALWDAEIAIMNGRAQTIIISYITK  
YRNAIREAFGDDHPMLKIATGDAAMYDEARRVKMEKIANKHGALITFENYRQVLKICEDCLKSSD  
PLMIGIGLIGMTGRRPYEVFTQAEFSPAPYGGVSKWSILFNGQAKTKQEGGTFGITYEIPVLT  
RSETVLAAYKRLRESGQKGLWHGMSIDDFSSETRLLLLRDTVFNL FEDVWPKEELPKPYGLRHLYA  
EVAYHNFAPPHVTKNSYFAAILGHNNNDLETSLSYMTYTL PEDRDNALARLKR TNERTLQQMATI

APVSRKG

>4E1RB

MSYHHHHHHHDYDIPPTTENLYFQGAMAKKVTVTLVDDFDGSGAADETVFGLDGVTYEIDLSTKN  
ATKLRGDLKQWVAAGRVRVGG

>4E2IL

KQVSWKLVTEYAMETKDDVLLLLGMYLEFQYSFEMCLKCIKKEQPSHYKYHEKHANAAIFADS  
KNQKTICQQAVDTVLAKKRVDSLQLTREQMLTNRFNLDLDRMDIMFGSTGSADIEEWMAGVAWLH  
CLLPKMSDVVYDFLKCMVYNI PKKRYWLFKGPIDSGKTTLAAALLELCGGKALNVNPLDRLNFE  
LGVAIDQFLVVFEDVKGTGGESRDLPSGQGINNLDNLRDYL DGSVKVNLEKKHLNKRTOIFPPGI  
VTMNEYSVPKTLQARFVKQIDFRPKDY LKHCLERSEFLEKRI IQSGIALLLMLI WYRPVAEFAQ  
SIQSRIVEWKERLDKEFSLSVYQKMKFNVAMGIGVLD

>4EOGA

MGMRLVTTWGNPFQWEPITYEYRGIVKSRNTLPILVKTLEPERILILVADTMANYYDSGKNKP  
EIEEKSFSYSEVVEDTKERILWHIKEEVIEELREEDPELAKKIENMLKDERITIEVLPVGVVFG  
NITVEGEMLDYFYATYKLAEWLPVQNNLEVYLDLTHGINFMPTFTYRALRNLLGLLAYLYNVKF  
EIVNSEPYPLGVSQEIREDTILHIREIGEGVVRPRPQYSPVEGKLYWNAFISSVANGFPLVFASF  
YPNIRDVEDYLNKKLEEFVGVIEVGEREDGKPYVKREKALDRSFKNASKLYYALRVFNTKQFQNY  
KKEVPIEEIMEISKIFESLPRIGIILERQVEWLRNLVYGRWLWYENGEQKIKKGLLEIKDKKDKR  
KEAEALKKGKTISLAEAAKLTRIFSPSGERIEETIESPNVVRNFIAHSGFEYNIVYVKYDRLSDRL  
YFFYKDKKAAANLAYEALLYRGEKE

>4EQ6B

MGSSHHHHHHSHGSMEVLKNIRIYPLSNFITSTKNYINLPNELRNLISEEQESKLGFLHIESDF  
KPSVALQKLVNCTTGDEKILIIDIVSIWSQQQRQHGA IYMNSLSCINITGLIVFLELLYDSPMD  
ALRRQCVDNFNFLRGIVIDNLSFLNFESDKNYDVINLSKFEKLFKILRKLREFLGCWIITKSF  
TDFYNGIENTLVDKWSIKRKSQVTLPTKLPDSYMKGMDLIYREVVDGRPQYRRIAAL

>4EQ6A

MMEYEDLELITIWSPSTKNKLCQFIKQNLKHEHVVTQLFFIDATSSFPLSQFQKLVPTLPENVR  
IYENIRINTCLDLEELSAITVKLLQILSMNKINAQRGTEDAVTEPLKIILYINGLEV MFRNSQFK  
SSPQRSHELLRDTLLKLRVMGNDENENASIRTLLEFPKEQLLDYLLKNNNTRTSSVRSKRRRIK  
NGDSLAEYIWKYADSLFE

>4ER8A

MSEYRRYYIKGGTWFFTVNLRNRRSOLLTTQYQMLRHAIKVKRDRPFEINAWVVLPEHMHCIWT  
LPEGDDDFSSRWREIKKQFTHACGLKNIWQPRFWEHAIRNTKDYRHHVDYIYINPVKHGWVKQVS  
DWPFFSTFHRDVARGLYPIDWAGDVTDF SAGERIIS

>4EXWE

GIDPFTMLHIEFITDLGAKVTVDVESADKLLDVQRQYGR LGWTSGEVPVGGYQFPLENEPDFDWS  
LIGARKWTNPEGEEMILHRGHAYRRRELEAVDSRKMKLPAAVKYSRGAKNTDPEHVREKADGEFE  
YVTLAIFRGGKRQERYAVPGSNRPQAGAPARSAATRAQGARGAVAVQDEETPF

>4F6MA

ANKRMKVKHDDHYELIVDGRVYYICIVCKRSYVCLTSLRRHFNIHSWEKKYPCRYCEKVFLAEY  
RTKHEIHHTGERRYQCLACGKSFINYQFMSSHIKSVHSQDPSGDSKLYRLHPCRSLQIRQYAYLS  
DRS

>4FB3E

MHHHHHHSDFPSSLTGYLSHAIYSNKTFPAFLVYSTKEKCKQLYDTIGKFRPEFKCLVHYEEGGM

LFFLTMTKHRVSAVKNYCSKLCVSVFLMCKAVTKPMECYQVVTAAPFQLITENKPLGHQFEFTDE  
PEEQKAVDGSHHHHHH

>4FCYC

GTTTTCGCATTTATCGTGAAACGCTTTTCGCGTTTTTCGTGCGCCGCTTCATCTGATGTGTTGTTG  
ACG

>4FCYB

IARPTLEAHDYDREALWSKWDNASDSQRRRLAEKWLPAVQAADEMLNQGISTKTAFATVAGHYQVS  
ASTLRDKYYQVQKFAKPDWAAAALVDGRGASRRNVHKSEFDEDAWQFLIADYLRPEKPAFRKCYER  
LELAAREHGWSIPSRATAFRRIQQLEAMVVACREGEHALMHLI PAQQRRTVEHLDAMQWINGDGY  
LHNVFVRWFNGDVIRPKTWFWQDVKTRKILGWRCVDVSENIDSIRLSFMDVVTRYGIPEDFHITID  
NTRGAANKWLTGGAPNRYRFKVKEDDPKGLFLLMGAKMHWTSVVAGKGGWQAKPVERAFVGGGLE  
EYVDKHPALAGAYTGPNPQAKPDNYGDRAVDAELFLKTLAEGVAMFNARTGRETEMCGGKLSFDD  
VFEREYARTIVRKPTEEQKRMLLLPAEAVNVSRKGEFTLVKVGGS LKGAKNVYYNLALMLAGVKKV  
VVRFPDQQLHSTVYCYTLDGRFICEAECLAPVAFNDAAAGREYRRRQKQLKSATKAAIKAQKQMD  
ALEVAELLP

>4FE7A

MGSSHHHHHSSGLVPRGSHMFTKRHRITLLFNANKAYDRQVVEGVGEYLQASQSEWDIFIEEDF  
RARIDKIKDWLGDGVIADFDDKQIEQALADVDVPIVGVGGSYHLAESYPPVHYIATDNYALVESA  
FLHLKEKGVNRFAYGLPESSGKRWATEREYAFRQLVAEEKYRGVVYQGLETAPENWQHAQNRLA  
DWLQTLPPQTGI IAVTDARARHILQVCEHLHIPVPEKLCVIGIDNEELTRYLSRVALSSVAQGAR  
QMGYQAAKLLHRLLDKEEMPLQRI LVPVVRVIERRSTDYRSLTDPAVIQAMHYIRNHACKGIKVD  
QVLDAVGISRSNLEKRFKEEVGETIHAMIHAEKLEKARSLLISTTLSINEISQMCGYPSLQYFYS  
VFKKAYDTTPKEYRDVNSEVML

>4FJOC

MTTLTRQDLNFGQVVADVLSFLEVAVHLILYVREVYPVGI FQKRKKYNVPVQMSCHPELNQYIQ  
DTLHCVKPLLEKNDVEKVVVVVILDKEHRPVEKFVFEITQPPLLSINSDSLSHVEQLLAAFILKI  
SVCDAVLDHNPFGCTFTVLVHTREAAATRNMEKIQVIKDFPWILADEQDVHMHDPRLIPLKMTSD  
ILKMQLYVEERAHKN

>4FJOA

AAPNLAGAVEFSDVKTLLEKWIITISDPMEEDILQVVRYCTDLIEEKDLEKLDLVIKYMKRLMQQ  
SVESVWNMAFD FILDNVQVVLQQTYGSTLKVT

>4FW2B

PLREAKDLHTALHIGPRALSKASNISMQQAREVVQTCPHCNSAPALEAGVNPRGLGPLQIWIQDF  
TLEPRMAPRSWLAVTVDTASSAIVVTQHGRVTSVAVQHHWATAIAVLGRPKAIKTDNGSCFTSKS  
TREWLARWGIAHTTGIPGNSQGQAMVERANRLKDKIRVLAEGDGMKRIPTSKQGELLAKAMYA  
LNHKERGENTKTPIQKHWRPVLTTEGPPVKIRIETGEWEKGWNVLVWGRGYAAVKNRDTDKVIWV  
PSRKVKPDIT

>4G12B

MTASAPDGRPGQPEATNRRSQLKSDRRFQLLAAAERLFAERGF LAVRLEDIGAAAGVSGPAIYRH  
FPNKESLLVELLVGVSARLLAGARDVTTTSANLAAALDGLIEFHLD FALGEADLIRIQDRDLAHL  
PAVAERQVRKAQRQYVEVWVGLRELNPGLAEADARLMAHAVFGLLNSTPHSMKAADSKPARTVR  
ARAVLRAMTVAALSAADRCL

>4G4KB

MDNSVETIELKRGSNSVYVQYDDIMFFESSTKSHRLIAHL DNRQIEFYGNL KELSQLDDRRFFRCH



NSFVVNRHNIESIDSKERIVYFKNKEHCYASVRNVKKI

>4G6DB

MKLIKILDKDNATLNVFHRNKEHKTIDNVPTANLVDWYPLSNAYEYKLSRNGEYLELKRLRSTLPS  
SYGLDDNNQDIIRDNNHRCKIGYWYNPAVRKDNLKIIEKAKQYGLPIITEEYDANTVEQGFRDIG  
VIFQSLKTIVVTRYLEGKTEEELRIFNMKSEESQLNEALKESDFSVDLTYSDLGQIYNMLLLMKK  
ISK

>4G6DA

MKEQLEDVLDLTDREENVLRRLRFGLDDGRTRTLEEVGKVFVTRERIRQIEAKALRKLHRPSRS  
KRLKDFMD

>4GNXL

TTTTTTTTTTTTTTTTTTTTTTTTTTTTTTTTTTTTTTTTTTTTTTTTTTTTTTTTTTTTTTTTTTTT

>4GNXK

TTTTTTTTTTTTTTTTTTTTTTTTTTTTTTTTTTTTTTTTTTTTTTTTTTTTTTTTTTTTTTTTTTTT

>4GNXZ

MPIYPIEGLSPYQNRWTIKARVTSKSDIRHWSNQRGEGKLFVSNLLDDSGEIKATGFNDVDRFY  
PLLQENHVYLISKARVNIAKKQFSNLQNEYEITFENSTEIEECTDATDVPEVKYEFVRINELESV  
EANQQCDVIGILDSYGELSEIVSKASQRPVQKRELTLVDQGNRSVKLTLWGKTAETFPNAGVDE  
KPVLAFKGVKVGDFGGRSLSMFSSSTMLINPDITESHVLRGWYDNDGAHAQFQPYTNGGVGGGAM  
GGGGAGANMAERTIVQVKDENLGMSEKPDYFNVRATVVYIKQENLYYTACASEGCNKKVNL DHE  
NNWRCEKCDRSYATPEYRYILSTNVADATGQMWLSGFNEDATQLIGMSAGELHKLREESESEFSA  
ALHRAANRMYMFCRAKMDTFNDTARVRYTISRAPVDFAKAGMELVDAIRAYM

>4GS3A

SNAMAGNFLENNTVTLVGKVFTPLEFSHELYGEKFFNF ILEVPRLSETKDYLPITISNRLFEGMN  
LEVGTRVKIEGQLRSYNRKSPEEGKNKLILTVFARDISVVPE

>4H79A

GSMTTTEPKTISL TWVGT FVDQRVREIQEGYRLDNPRAVATLARLRGAGKEIGDTPDLWGLIL  
DDRFYADAPPLKEKDMEVAENSAHIALTYAIHQSSRRDRMHQRGWGLGEAVRRLMPSS EIDEP  
LRKRQVQVGHAVTYKALAQRLREIVTLLRRDAIPLDYGLLADQLYQFRTPQGAQRVRTAWGRGFH  
AYRPKTTQNPDSTTTTEKDNS

>4H7AB

MSRGHHHHHGSMSPGERFLDWLKRLLQGQKAWTAARAAFRRS LAFPPGAYPRAMPYVEPFLAKGD  
WRQEEREAHYLVAAALYALKDGDH QVGRTLARALWEKAQGSASVEKRFLALLEADR DQIAFRLRQA  
VALVEGGIDFARLLDDLLRWFSPERHVQARWAREYYGA

>4H9SE

GSRRQIQRLEQLLALYVAEIRRLQEKELDLSELDDPDSAYLQEARLKRKLIRLFGRLCELKDCSS  
LTGRVIEQRI PYRGTRYPEVNRRIERLINKPGPDTFPDYGDVLR AVEKAAARHSLGLPRQQLQLM  
AQDAFRDVGIRLQERRHLDLIYNFGCHLTDDYRPGVDPALSDPVLARRLRENRS LAMSRLDEVIS  
KYAMLQDKSEEGERKKRRARL

>4HD0B

HHHHHMKFAHLADIHLGYEQFHKPQREEEFAEAFKNALEIAVQENVDFILIAGDLFHSSRSPG  
TLKKAIAL LQIPKEHSIPVFAIEGNHDRTQRGPSVLNLL EDFGLVYVIGMRKEKVENEYLT SERL  
NGEYLVKGVYKDLEIHGMKYMSSAWFEANKEILKRLFRPTDNAILMLHQGVREVSEARGEDYFE  
IGLGD LPEGYLYARGHIHKRYETSYSGSPVVPYPGSLERWDFGDYEVRYEWDG IKFKERYGVNKG  
FYIVEDFKPRFVEIKVRPFIDVKIKGSEEEIRKAIKRLIPLIPKNAYVRLNIGWRKPFDLTEIKE

LLNVEYLKIDTWRI  
 >4HIDA  
 MSDSFSLLSQITPHQRCSFYAQVIKTWYSDKNFTLYVTDYTENELFFPMSPYTSSSRWRGPFGRF  
 SIRCILWDEHDFYCRNYIKEGDYVVMKNVRTKIDHLGYLECI LHGDSAKRYNMSIEKVDSEEP  
 NEIKSRKRLYVQN  
 >4HLXD  
 MHHHHHSSGVDLGTENLYFQSMGKASIKDWIVCQVNSGKFPGVEWEDEERTFRIPVTPLADPC  
 FEWRDGE LGVVYIRERGNMPVDASFKGTRRRRMLAALRRTRGLQEIGKGISQDGHFLVFRVR  
 KP  
 >4HOBA  
 GSHMASNPISEEMNLKILAYLGTKQGAKAVHIAQSLGAQRSEVNRHLYRMSDGRVRKHPQHPVW  
 YLPA  
 >4HP1C  
 MHHHHHSSGRENLYFQGSNKKRRCGVCVPLRKEPCGACYNVNRSTSHQICKMRKCEQLKKK  
 RVVPMKG  
 >4HTOA  
 MAASQTSQTVASHVPPADLCSTLERIQKSKGRAEKIRHFREFLD SWRKFHDALHKNHKDVTDSFY  
 PAMRLILPQLERERMAYGIKETMLAKLYIELLNLPDGDALKLLNYRTPGTGHDAGDFAMIAY  
 FVLKPRCLQKGS LTIQOVNDLLDSIASNNSAKRKDLIKKSLQLITQSSALEQKWLIRMIKDLK  
 LGVSQQTIFSVFHNDAAELHNVTTDLEKVCRLHDPVGLSDISI  
 >4HW0C  
 MQLERRKRGTMEIMFDILRNCEPKGITRVIYGAGINYVVAQKYLDQLVKVGALNIKTENDRKIY  
 EITEKGKLLRTHIEEFIKIRENLYSAKEKVSELLRTDSE  
 >4I1KB  
 MRGSHHHHHGSRSKFYESASARKRTVTAERERAINAAKTFEPTNPFRRVLRPSYLYRGCIMY  
 LPSGFAEKYLSGISGFIKVQLAEKQWPVRCLYKAGRAKFSQGWYEFTLENNLGEGDVCVFELLRT  
 RDFVLKVTAFRVNEYV  
 >4I99D  
 KKVEIDEEIFVIDDFRVDIEKYVEELYKVVKKIYEKTGTPIKFWDLVPDVEPKIIARTFLYLLFL  
 ENMGRVEIIQEPPFGEILVVPM  
 >4I99B  
 MPYIEKLELKGFKSYGNKKVVIPFSKGFTAIVGANGSGKSNIGDAILFVLGGLSAKAMRASRISD  
 LIFAGSKNEPPAKYAEVAIYFNNE DRGFPIDEDEVVIRRRVYPDGRSSYWLNGRRATRSEILDIL  
 TAAMISP DGYNIVLQGDITKFIKMSPLERRLLIDDISGIAEYDSKKEKALEEEKEKKNVFMRTFE  
 AISRNFSEIFAKLSPGGSARLILENPEDPFSGGLEIEAKPAGKDVKRIEAMSGGEKALTALAFVF  
 AIQKFKPAPFYLFDEIDAHLLDANVKRVADLIKESKESQFIVITLRDVMANADKIIGVSMRDG  
 VSKVVSLSLEKAMKILEEIRKKQGWEHGN  
 >4ICGD  
 GSHMSDKPLTKTDYLMRLRRCQTIDTLERVIEKNKYELSDNELAVFYSAADHRLAELTMNKLYDK  
 IPSSVWKFIR  
 >4IDUB  
 MSSQFIFEDVPQRNAATFNPEVGYVAFIGKYGQQLNFGVARVFFLNQKAKMVLHKT AQPSVDLT  
 FGGVKFTVNNHFPQYVSNPVPD NAITLHRMSGYLARWIADTCKASVLKLAESAQIVMPLAEVK  
 GCTWADGYTMYLGFAPGAEMFLDAFDYPLVIEMHRVLKDNMDVNFMKVLRQRYGTMTAEWMT

QKITEIKAAFNSVGLAWAKSGFSPAARTFLQQFGINI

>4IJHA

GSHMVGQLSRGAIAAIMQKGDNIKPIQVINIRPITGNSPPRYRLLMSDGLNTLSSFMLATQL  
NPLVEEEQLSSNCVCQIHRFIVNTLKDGRVILMELEVLKSAEAVGVKIGNPVVPE

>4IRHA

GAMVPKTEDQRPQLDPYQILGPTSSRLANPGSGQIQWLQFLELLSDSSNSSCITWEGTNGEFKM  
TDPDEVARRWGERKSKPNMNYDKLSRALRYYYDKNIMTKVHGKRYAYKFDHFGIAQALQPHPPE

>4IX7B

DNMVSIGPNNTCVPASVFENINWSVCSLATRKLVTIFDRETLATHSVTGKPSPAFKDQDKPLK  
RMLDPGKIQDIIFAVTHKCNASEKEVRNAITTKCADENKMMKIQNVKRRS

>4JJNJ

ATCGGATGTATATATCTGACACGTGCCTGGAGACTAGGGAGTAATCCCCTTGGCGGTAAAACGC  
GGGGGACAGCGCGTACGTGCGTTTAAGCGGTGCTAGAGCTGTCTACGACCAATTGAGCGGCCTCG  
GCACCGGATTCTCGAT

>4JJNI

ATCGAGAATCCCCTGCGGAGCCGCTCAATTGGTCGTAGACAGCTCTAGCACCGCTTAAACGCA  
CGTACGCGCTGTCCCCCGGTTTTAACCGCCAAGGGGATTACTCCCTAGTCTCCAGGCACGTGTC  
AGATATATACATCCGAT

>4JJNL

SAKTLKDLDGWQVIITDDQGRVIDDNNRRRSRKRGGENVFLKRISDGLSFGKGESVIFNDNVET  
YSVYLIHEIRLNTLNNVVEIWFVSYLRWFELKPKLYEQFRPDLIKEDHPLEFYKDKFFNEVNKS  
ELYLTAELSEIWLKDFIavgQILPESQWNDSSIDKIEDRDFLVRYACCEPTAEKFVPIDIFQIIRR  
VKEMEPKQSNeyLKRVSVPVSGQKTNRQVMHKMGVERS SKRLAKKPSMKKIKIEPSADDDVNNGN  
IPSQRGTSTHGSISPQEE SVSPNISSASPSALTSPTDSSKILQKRSISKELIVSEEIPINSSEQ  
ESDYEPNNETSVLSSKPGSKPEKTSTELVDGRENfVYANNPEVSDDGGLEEETDEVS

>4JJNH

SSAAEKPKASKAPAEKKPAAKKTSTSVDGKRSKVRKETYSSYIYKVLKQTHPDTGISQKSMSIL  
NSFVNDIFERiateASKLAAYNKKSTISAREIQTAVRLILPGELAKHAVSEGTRAVTKYSSSTQA

>4JJNG

SGGKGGKAGSAAKASQSRSAKAGLTFPVGRVHRLLRGNYAQRIGSGAPVYLTAVLEYLAAEILE  
LAGNAARDNKKTRII PRHLQLAIRNDDELNKLGNVTIAQGGVLPNIHQNLPLPKKSAKTAKASQE  
L

>4JLXA

GAMGAWKLQTVLEKVRLSRHEISEAAEVVNWVVEHLRLRQGGESEFKGVALLRGTSYYERVKIS  
APNEFDVMFKLEVPRIQLEEYCNSGAHYFVKFRNPGGNPLEQFLEKEILSASKMLSKFRKIIKE  
EIKNIEDTGVTVERKRRGSPAVTLLISKPEISVDIILALESKSSWPASTQKGLPISQWLGAQVK  
NNLKRQPFYLVPKHAKEGSGFQEETWRLSFHIEKDILKNHGQSKTCCEIDGVKCCRKECLKLMK  
YLLEQLKKKFGNRRELAKFCSYHVKTAFHVCTQDPHDNQWHLKNLECCFDNCVAYFLQCLKTEQ  
LANYFIPGVNLSRDLIDKPSKEFLSKQIEYERNNGFPVFW

>4JOIC

MLPKPGTYLPEVVSAGQVPDGLRFTFGRCLCLYDMIQSRVTLMAQHGSQHQVLVCTKLVEPFH  
AQVGSlyIVLgELQHQQDRGSVVKARVLTCEGMNPLLEQAIREQRlyKQERGGSQ

>4JOIB

LDPVFLAFaklyIRDILDMKESRQVPGVFLYNGHPiKQVDVLGTVIGVRERDAFYsyGVDDSTGV

INCICWKKLNTESVSAAPSAARELSLTSQLKKLQETIEQKTKIEIGDTIRVRGSIRTYREEREIH  
 ATTYKVVDDPVWNIQIARMLELPTIYRKVYDQPFHS

>4JOLD

SEEMIDHRLTDREWAEEWKHLHDHLLNCIMDMVEKTRRSLTVLRRCEADREELNYWIRRYSDAE

>4JQFA

AEALSNPGALDPLSLTSLSEKAKEFLMENRVQSFYQQELEMVESLLSLANQPVIHSASSDQVNF  
 KKDTTSKAIHSIFKNAIQLLQEKGLVFQKDDGFDNLYYVTREDKDLHRKIHRIIQQDCQKPNHME  
 KGCHFLHILACARLSIRPGLSEAVLQQVLELLEDQSDIVSTMEHYTAF

>4JW3D

MRGSHHHHHHTDPEKVEMYIKNLQDDSYFVRRAAAAALGKIGDERAVEPLIKALKDEDRFVRSSA  
 AYALGEIGDERAVEPLIKALKDEDFVRRAAVALGEIGGERVRAAMEKLAETGTGFARKVAVNY  
 LETHKSLIS

>4JW3B

AAPTATVTPSSGLSDGTVVVKVAGAGLQAGTAYWVAQWARVDTGVWAYNPADNSSVTADANGSAST  
 SLTVRRSFEGFLFDGTRWGTVDCTTAACQVGLSDAAGNGPEGVAISFAAHHHHHH

>4K2JA

SHPRYQQPPVYRQIDDCPAKARPQHI FYRRFLGKDGRDPKCQWKFAVIFWGNDPYGLKLSQA  
 FQFGGVKAGPVSCLPHPGPDQSPITYCVYVYQNKDTSKKVQMARLAWESHPLAGNLQSSIVKF  
 KKPLPLTQPG

>4K74B

HHHHHMKFTVEREHLKPLQQVSGPLGGRPTLPILGNLLLQVADGTLSTGTDLMEMVARVAL  
 VQPHEPGATTVPARKFFDICRGLPEGAEIAVQLEGERMLVRSRGRSFLSTLPAADFNLDDWQS  
 EVEFTLPQATMKRLIEATQFSMAHQDVRYLNGMLFETEGEELRTVATDGHRLAVCSMPIGQSLP  
 SHSVIVPRKGVIELMRMLDGGDNPLRVQIGSNNIRAHVGDIFITSKLVDRFPDYRRVLPKNPKD  
 HLEAGCDLLKQAFARAAILSNEKFRGVRLYVSENQLKITANNPEQEEAEEILDVITYSGAEMEIGF  
 NVSYVLDVNLKNCENVRMMLTDSVSSVQIEDAASQSAAYVMPMRL

>4KPYA

MNHLGKTEVFLNRFALRPLNPEELRPWRLEVVLDDPPGREEVYPLLAQVARRAGGVTVRMGDGLA  
 SWSPPPEVLVLEGT LARMGQTYAYRLYPKGRRPLDPKDPGERSVLSALARRLLQERLRRLEGVWVE  
 GLAVYRREHARGPGWRVLLGAVLDLWVSDSGAFLLEVDPAYRILCEMSLEAWLAQGHPLPKVRN  
 AYDRRTWELLRLGEEDPKELPLPGGLSLLDYHASKGRLOGREGGRVAWVADPKDPRKPIPHLTGL  
 LVPVLTLEDLHEEEGLALSPLWEERRRRTREIASWIGRRLGLGTPEAVRAQAYRLSIPKLMGRR  
 AVSKPADALRVGFYRAQETALALLRLDGAQGWEFLRRALLRAFGASGASLRLHTLHAHPSQGLA  
 FREALRKAKEEGVQAVLVLTTPMAWEDRNRLKALLLREGLPSQILNVPLREEERHRWENALLGLL  
 AKAGLQVVALSGAYPAELAVGFDAGGRESFRFGGAACAVGGDGGHLLWTLPEAQAGERIPQEVVW  
 DLLEETLWAFRRKAGRLPSRVLLLRDGRVPQDEFALALEALAREGIAYDLVSVRKS GGGRVYPVQ  
 GRLADGLYVPLEDKTFLLLTVHRDFRGTPRPLKLVHEAGDTPLEALAHQIFHLTRLYPASGFAPF  
 RLPAPLHLADRLVKEVGRLGIRHLKEVDREKLFFV

>4LDUA

MMASLSCVEDKMKTSCLVNGGGTITTTTSQSTLLEEMKLLKDQSGTRKPVINSELWHACAGPLVC  
 LPQVGS LVYFYSQGHSEQVAVSTRRSATTQVPNYPNLPSQLMCQVHNVTLHADKDSDEIYAQMSL  
 QPVHSERDVFVPDFGMLRGSKHPTEFFCKTLTASDTSTHGGFSVPRRAAEKLFPPLDYSAQPPT  
 QELVVRDLHENTWTFRHIYRGQPKRHLLTTGWSLFGVSKRLRAGDSVLFIRDEKSQLMVGVRAN  
 RQQTALPSSVLSADSMHIGVLA AAAHATANRTPFLIFYNPRACPAEFVIPLAKYRKAICGSQLSV

GMRFGMMFETEDSGKRRYMGTIVGISDLDPLRWPGSKWRNLQVEWDEPGCNDKPTRVSPWDIETP  
NSYSQSM

>4LG8A

MHHHHHSSGRENLYFQGTPEIIQKLQDKATVLTTERKERGKTVPEELVKPEELSKYRQVASHVG  
LHSASIPGILALDLCPSDTNKILTGGADKNVVVFDKSSEQILATLKGHTKKVTSVVFHPSQDLVF  
SASPDATIRIWSVPNASCVQVVRAGESAVTGLSLHATGDYLLSSDDQYWAFSDIQTGRVLTKV  
DETSGCSLTCAQFHPDGLIFGTGTMSQIKIIDLKERTNVANFPGHSGPITSIAFSENGYYLATA  
ADDSSVKLWDLRKLKNFKTLQLDNNFEVKSLIFDQSGTYLALGGTDVQIYICKQWTEILHFTEHS  
GLTTGVAFGHHAKFIASSTGMDRSLKFYSL

>4LJKA

MKSHFQYSTLENIPKAFDILKDPPKLYCVGDTKLLDTPKVAIIIGTRRPTPYKQHTITLAREL  
AKNGAVIVSGGALGVDIIAQENALPKTIMLSPCSLDFIYPTNNHKVIEIAQNGLILSEYEKDFM  
PIKGSFLARNRLVIALSDVVIIPQADLKSGSMSARLAQKYQKPLFVLPQRLNESDGTNELLEK  
QAQGFNIQNFINTLLKDYHLKEMPELEHHHHH

>4LRVL

SMLPNRMALSQRTEDELKLLKGYTGITPNIAARLAFFRSVESEFRYSPERDSKKLDGTLVLDKIT  
WLGETLQATELVLMLYPQLEQKALIKAWAAHVEDGIAALRNHK

>4M6WB

MGHIVANEKWRGSQLAQEMQGIKLI FEDGLTPDFYLSNRCCILYVTEADLVAGNGYRKRLVVR  
NSNNLKGIVVVEKTRMSEQYFPALQKFTVLDLGMVLLPVASQMEASCLVIQLVQEQTKEPSKNPL  
LGKKRALLLSEPSLLRTVQQIPGVGKVKAPLLLQKFPSIQQLSNASIGELEQVVGQAVAQQIHAF  
FTQPRLEHHHHH

>4M6WA

MGOEGKGTICILVGGHEITSGLEVISSLRAIHGLQVEVCPLNGCDYIVSNRMVVERRSQSEMLNSV  
NKNKFIEQIQHLQSMFERICVIVEKDREKTGDTSRMFRRTKSYDSLTTLIGAGIRILFSSQEE  
TADLLKELSLVEQRKNVGIHVPTVNSNKSEALQFYLSIPNISYITALNMCHQFSSVKRMANS  
QEISMYAQVTHQKAEIYRYIHYVFD

>4MZ9D

MASRGVNKVI LVGNLQDPEVRYMPNGGAVANITLATSESWRDKATGEMKEQTEWHRVVLFGKLA  
EVASEYLRKGSQVYIEGQLRTRKWTQSGQDRYTTEVVVNVGGTMQMLGGRQGGGAPAGNIGGG  
QPQGGWGQPQQPQGGNQFSGGAQSRPQQSAPAAPSPNEPPMDFDDDI PF

>4N0UE

GGPSVFLFPPKPKDTLYITREPEVTCVVVDVSHEDPEVKFNWYVDGVEVHNAKTKPREEQYNSTY  
RVVSVLTVLHQDWLNGKEYKCKVSNKALPAPIEKTISKAKGQPREPQVYTLPPSRDELTKNQVSL  
TCLVKGFYPSDIAVEWESNGQPENNYKTTPPVLDSGSSFFLYSKLTVDKSRWQQGNVFSVMSHE  
ALHNHYTQKSLSLS

>4N0UD

HKSEVAHRFKDLGEENFKALVLI AFAQYLQCCPFEDHVKL VNEVTEFAKTCVADESAENCDKSLH  
TLFGDKLCTVATLRETYGEMADCCAKQEPERNECFLOHKDDNP LRLVRPEVDVMCTAFHDNEE  
TFLKLYLIEIARRHPYFYAPELFFAKRYKAAFTCECQAADKAACLLPKLDEL RDEGKASSAKQR  
LKCASLQKFGERAFKAWAVARLSQRFPKAEFAEVSKLVTDLTKVHTECCHGDILLECADDRADLAK  
YICENQDSISSKLKECCEKPLEKSHCIAEVENDEMPADLPSLAADFVESKDVCKNYAEAKDVFL  
GMFLYEYARRHPDYSVVLLLRLAKTYETTLEKCCAAADPHECYAKVFDEFKPLVEEPQNLIKQNC  
ELFEQLGEYKFNALLVRYTKKVPQVSTPTLVEVSRNLGKVGSKCKHPEAKRMPCAEDYLSVVL

NQLCVLHEKTPVSDRVTKCCTESLVNRRPCFSALEVDETYVPKEFNAETFTFHADICTLSEKERQ  
 IKKQTALVELVKHKPKATKEQLKAVMDDFAAFVEKCKADDKETCFAEEGKKLVAASQAALGL  
 >4N0UB  
 IQRTPKIQVYSRHPAENGKSNFLNCYVSGFHPDIEVDLLKNGERIEKVEHSDLSFSKDWDFYLL  
 YYTEFTPTEKDEYACRVNHVTLSQLKIVKWDRDM  
 >4N0UA  
 HLSLLYHLTAVSSPAPGTPAFWVSGWLGPPQYLSYNSLRGEAEPGAWVWENQVSWYWEKETDLD  
 RIKEKLFLEAFKALGGKGPYTLQGLLGCELGPDNTSVPTAKFALNGEEMNFDLKQGTWGGDWPE  
 ALAISQRWQQDKAANKELTFLLFSCPHRLREHLERGRGNLEWKEPPSMRLKARPSSPGFSVLTC  
 SAFSFYPPELQLRFLRNGLAAGTGQGDGFPNSDGSFHASSSLTVKSGDEHHYCCIVQHAGLAQPL  
 RVEL  
 >4N6QA  
 MSAANYPDPSLPRPSTSDDFELIVRQNPNRARVAGGKEKERKPVDPPIVQIRVREEGTylaQHY  
 LQSPYFFMCSCLYDAQEDAPASIPPSTALTGTLVSSLHRLKDVDNTDGGFFVWGDLSIKVEGDFR  
 LKFSLFEMRKTDVVFLKSIVSERFTVSPPKSFPGMAESTFLSRSFADQGVKLRIRKEPRTSAWSH  
 PQFEK  
 >4N6RB  
 MYAVEDRAHSGHHPPPLSMDRIPPPSTMYPSSAGPSAMVSPAGQPEPELSTVHDGRIWSLQVVQ  
 QPIRARMCGFGDKDRRPITPPPCIRLIVKDAQTQKEVDINSLDSSFYVVMADLWNADGTHEVNLV  
 KHSATSPSISTAMSSSYPPPHPTSSDYASYQTNPYGQPVGQPVGQPVGYAGVGNYYGGSTQLQ  
 YQNAYPNPQAQYYQPMYGGMAQPMPAAQPVTPGPGGMFTRNLIGCLSASAYRLYDTEDKIGVWF  
 VLQDLSVRTEGIFRLKFSFVNVGKSVSDLQSDIAEVINKGTAPILASTFSEPFQVFSAKKFPGV  
 IESTPLSKVFANQGIKIPIRKDGKGGSRGRHSEDDGLDNEYSAAAAHHH  
 >4NDFa  
 GSHMGHWSQGLKISMQDPKMQVYKDEQVVVIKDKYPKARYHWLVLPWTSISSLKAVAREHLELLK  
 HMHTVGEKVIIVDFAGSSKLRFRGLGYHAIPSMHVHLHVISQDFDSPCLKNKKHWN SFNTEYFLES  
 QAVIEMVQEAGRVTVRDGMPELLKPLPRCHECQQLLPSIPQLKEHLRKHWTQ  
 >4NJXD  
 MSHHHHHHSMAAAVVLAAGLRAARRAVAATGVRGGQVRGAAGVTDGNEVAKAQQATPGGAAPTIF  
 SRILDKSLPADILYEDQQLVFRDVAPQAPVHFLVI PKKPIPRISQAEEEDQQLLGHLLLVAKQT  
 AKAEGLDGYRLVINDGKLGASVYHLHIHVLGGRQLQWPPG  
 >4NL4H  
 HHHHHHSSGLVPRGSHMSVAHVALPVPLPRTFDYLLPEGMAVKAGCRVRVPFGKQERIGIVAAS  
 ERSELPLDELKPVAEALDDEPVFSTTVWRLLMWAAEYHHPIGDVLFHALPVMLRQKGPASATPL  
 WYWFATEQGVVDLNLKRSRQQAALALRQGIWRHQVGELEFNEAALQALRGKGLAELACEA  
 PALTDWRSAYSVAGERLRLNTEQATAVGAIHSAADRFSAWLLAGITGSGKTEVYLSVLENVLAQG  
 RQALVMVPEIGLTPQTIARFRQRFNAPVEVLHSGLNDSERLSAWLKAKNGEAAIVIGTRSSLFTP  
 FKDLGVIIVIDEHDSYKQQEGWRYHARDLAVWRAHSEQIPIILGSATPALETLHNVRQGKYRQL  
 TLSKRAGNARPAQHVLDLKGQPLQAGLSPALISRMRQHLQADNQVILFLNRRGFAPALLCHDCG  
 WIAECPRCDSYTLHQAHHLRCHHCDSQRPIPRQCPSCGSTHLVPVGIGTEQLEQALAPLFPEV  
 PISRIDRDTTSRKGAL EEHLAAVHRGGARILIGTQMLAKGHHFPDVTLVSLLDVDGALFSADFRS  
 AERFAQLYTQVSGRAGRAGKQGEVILQTHHPEHPLLQTLTYKGYDAFAEQALAEQTMQLPPWTS  
 HVLIRAEDHNNQAPLFLQQLRNLLQASPLADEKLWVLGVPALAPKRGGRRWQIILLQHPSRVR  
 LQHIVSGTLALINTLPEARVVKWVLDVDPIEG

>4NQWB

MTEHTDFELLELATPYALNAVSDDERADIDRRVAAAPSPVAAAFNDEVRAVRETMAVVSAAATTAEP  
PPAHLRTAILDATKP

## (2) 550 non-DNA-binding proteins

>1RQWA

ATFEIVNRCSYTVWAAASKGDAALDAGGRQLNSGESWTINVEPGTKGGKIWARTDCYFDDSGSGI  
CKTGDCGGLLRCKRFRPPTTLAEFSLNQYKDYIDISNIKGFNVPMDFSPTTRGCRGVRCAADI  
VGQCPAKLKAPGGGCNDACTVFQTSEYCCTTGKCGPTEYSRFFKRLCPDAFSYVLDKPTTVTCPG  
SSNYRVTFCTA

>1H2GB

SNMWVIGKSKAQDAKAIMVNGPQFGWYAPAYTYGIGLHGAGYDVTGNTPFAYPGLVFGHNGVISW  
GSTAGLGDDVDIFAERLSAEKPGYLLHNGKWKMLSREETITVKNQQAETFTVWRTVHGNILQTD  
QTTQTAYAKSRAWDGKEVASLLAWTHQMKAKNWQEWTOQAQALTNWYYADVNGNIGYVHTGA  
YPDRQSGHDPRLPVPPTGKWDWKGLLPFEMNPKVYNPQSGYIANWNNSPQKDYPASDLFAFLWGG  
ADRVTEIDRLLEQKPRLTADQAWDVIRQTSRQDLNRLFLPTLQAATSGLTQSDPRRQLVETLTR  
WDGINLLNDGKTWQPGSAILNVWLTSMLKRTVVAAVPMPFDKWYSASGYETTQDGPSTGLNIS  
VGAKILYEAVQGDKSPIPQAVDLFAGKPQQEVVLAALDWTWETLSKRYGNNVSNWKTAMALTFR  
ANNFFGVPQAAAETRHOAEYQNRGTENDMIVFSPTTSDRPVLAWDVVAPGQSGFIAPDGTVDKH  
YEDQLKMYENFGRKSLWLTQDVEAHKESQEVLVHVR

>1A12A

RRSPPADAIKSKKVKVSHRSHSTEPGLVLTGQGDVGLGLGENVMERKKPALVSIPEVQAE  
AGGMHTVCLSKSGQVYSFGCNDGALGRDTSVEGSEMVPKVELQEKVVQVSAGDSHTAALTDDG  
RVFLWGSFRDNGVIGLLEPMKSMVPVQVQLDVPVVKVASGNHMLTADGDLYTLGCGEQGG  
LGRVPELAFANRGRQGLERLLVPKCVMKSRGSRGHVRFQDAFCGAYFTFAISHEGHVYGFGLSN  
YHQLGTPGTESCFIGPQLTSFKNSTKSWVGFSGGQHHTVCMDEGKAYSLGRAEYGRGLGEGAE  
EKSIPTLISRPAVSSVACGASVGYAVTKDGRVFAWGMGTNYQLGTGQDEDAWSPVEMMGKQLEN  
RVVLSVSSGGQHTVLLVKDKES

>3INGA

GMKEIRIILMGTGNVGLNVLRIIDASNRRRSAFSIKVVGVSDRSYASGRNLDISSIIISNKEKTG  
RISDRAFSGPEDLMGEAADLLVDCTPASRDGVREYSLYRMAFESGMNVVTANKSGLANKWHDIMD  
SANQNSKYIRYEATVAGGVPLFSVLDYSILPSKVKRFRGIVSSTINYVIRNMANGRSLRDVDDA  
IKKGIAESNPQDDLNLDAARKSVILVNHIFGTEYTLNDVEYSGVDERSYNANDRLVTEVYVDDR  
RPVAVSRIISLNKDDFLMSIGMDGLGYQIETDSNGTVNVSDIYDGPYETAGAVVNDILLLSKVQK

>2RAUA

GMYEWEKIVKREAPILGNDQLIENIWKMKREDSFYDIISLHKVNLIGGGNDAVLILPGTWSSGEQ  
L23VTISWNGVHYTIPDYRKSIVLYLARNGFNVTIDYRTHYVPPFLKDRQLSFTANWGWSTWIS  
DIKEVVSFIKRDGQERIYLAGESFGGIAALNYSSLYWKNDIKGLILLDGGPTKHGIRPKFYTPPE  
VNSIEEMEAKGIYVIPSRRGPNPIWSYALANPDMPSDPKYKISDFLMDSLYVTGSANPYDYP  
YSKKEDMFPILASFDYWPYRSLERDLKFDYEGILVPTIAFVSRFQIFDSKILPSNSEIIL  
LKGYGHLDVYTGENSEKDVNSVVLKWLSSQR

>1UAIA

AEPCDYPAQQLDLTDWKVTLPIGSSGKPEIEQPALDTFATAPWFQVNAKCTGVQFRAAVNGVTT  
SGSGYPRSELREMTDGEEKASWSATSGTHTMVFREAFNHLPEVKPHLVGAQIHDGDDDVTFRL

EGTSLYITKGD DTHHKLVTSDYKLN TVFEGKFV VSGGKIKVYYNGVLQTTISHTSSGNYFKAGAY  
TQANCSNSSPCSSSNYGQVSLYKLVTHS

>3H5QA

SNAMRMIDIIEKKRDGHTLTTEEINFFIGGYVKGDIPDYQASSLAMAIYFQDMNDDERVALTMAM  
VNSGDMIDLSDIKGVKVDKHSTGGVGD TTTLV LAPLVA AVDVPVAKMSGRGLGHTGGTIDKLEAI  
DGFHVEIDEATFVKLVNENKVAVVGQSGNLT PADKKLYALRDVTGTVNSIPLIASSIMSKKIAAG  
ADAIVLDVKTGSGAFMKTLEDAEALAHAMVRIGNNVGRNTMAIISDMNQPLGRAIGNALELQEI  
DTLKGQGP KDLTELVLTLGSQMVLANKAETLEEARALLIEAINSGAALEKFKTFIKNQGGDETV  
IDHPERLPQAQYQIEYKAKKSGYVTELVSNDIGVASMMLGAGRLTKEDDIDLAVGIVLNKKIGDK  
VEEGESLLTIHSNRQDVDDVVKKLDSSITIADHVVSPTLIHKIITE

>3N20A

MSMLKREDWYDLTRTTNWT PKYVTENELFPEEMSGARGISMEAWEKYDEPYKITYPEYVSIQREK  
DSGAYSIKAALERDGFVDRADPGWVSTMQLHFGAIALEEYAASTAEARMARFAKAPGNRNMATFG  
MMDENRHGQIQLYFPYANVKRSRKWDWAHKAHTNEWAAIAARSFFDDMMMT RDSVAVS IMLTFA  
FETGFVNMQFLGLAADA EAGDHTFASLISSIQTDESRHAQQGGPSLKILVENGGKDEAQQMVDV  
AIWRSWKLF SVLTGPIMDY YTPLESRNQSFKEFMLEWIVAQFERQLLDLGLDKPWYWDQFMQDLD  
ETHHGMHLGVWYWRPTVWWDPAAGVSP EEREWLEEKYPGWNDTWGQCWDVITDNLVNGKPELTVP  
ETLPTICNMCNLPIAHTPGNKWNVKDYQLEYEGRLYHFGSEADRWC FQIDPERYENHTNLVDRFL  
KGEIQPADLAGALMYMSLEPGVMGDDAHDYEWVKAYQKKTNA

>3N2BA

MHHHHHSSGVDLGTENLYFQSNAMYFN YQEDGQLWAEQVPLADLANQYGTPLYVYSRATLERH  
WHAFDKSVGDYPHLICYAVKANSNLGVLN T LARLGSGFDIVSVGELERVLAAGGDP SKVVFSGVG  
KTEAEMKRALQLKIKCFNVESEPELQRLNKVAGELGVKAPISLRINPDVDAKTHPYISTGLRDNK  
FGITFDRAAQVYRLAHS LPNLDVHGIDCHIGS QLTALAPFIDATDRLLALIDSLKAEGIHIRHLD  
VGGGLGVVYRDELPPQPSEYAKALLDRLERHRDLELIFEFGRAIAANAGVLVTKVEFLKHTEHKN  
FAIIDAAMNDLIRPALYQAWQDIIPLRPRQGEAQTYDLVGPVCETSDFLGKDRDLVLQEGDLLAV  
RSSGAYGFTMSSNYNTRPRVAEVMVDGNKTYLVRQREELSSLWALESVLPE

>1P0WA

TIKEMPQPKTFGELKNLPLLN TDKPVQALMKI ADELGEIFKFEAPGRVTRYLSSQRLIKEACDES  
RFDKNLSQALKFVRDFAGDGLFTSWTHEKNWKAHNILLPSFSQQAMKGYHAMMVDIAVQLVQKW  
ERLNADEHIEVPEDMTRLTLD TIGLCGFNYRFNSFYRDQPHPFITSMVRALDEAMNKLQRANPDD  
PAYDENKRQFQEDIKVMNDLVDKI IADRKASGEQSDDLTHMLNGKDPETGEPLDDENIRYQIIT  
FLIAGHETTSGLLSFALYFLVKNPHVLQKAAEEAARVLVDPVPSYKQVKQLKYVGMVLNEALRLW  
PTAPAFSLYAKEDTVLGGEYPLEKGD ELMVLI PQLHRDKTIWGDDVEEFRPERFENPSAIPQHAF  
KPWNGQQRACIGQQFALHEATLV LGMMLKHFD FEDHTNYELDIKETLTLKPEGFVVKAKSKKIPL

>1UJ0A

AGHMARRVRALYDFEAVEDNELTFKHGELITVLDDSDANWWQGENHRGTGLFSPNFVTTDLS

>1UJMA

AKIDNAVLPEGSLVLVTGANGFVASHVVEQLLEHGYKVRGTARSASKLANLQKRWDKYPGRFET  
AVVEDMLKQGAYDEVIKGAAGVAHIASVVSFSNKYDEVVTPAIGGTLNALRAAAATPSVKRFVLT  
SSTVSALIPKPNVEGIYLDEKSWNLESIDKAKTLPESDPQKSLWVYAASKTEAELA AWKFMDENK  
PHFTLNAVLPNYTIGTIFDPETQSGSTSGWMSL FNGEVSPALALMPPQYVSAVDIGLLHLGCL  
VLPQIERRRVYGTAGTFDWN TVLATFRKLYPSKTFPADFPDQGDLSKFD TAPSLEILKSLGRPG  
WRSIEESIKDLVGSETA



>1PAHA

TVPWFPRTIQELDRFANQILSYGAELDADHPGFKDPVYRARRKQFADIAYNYRHGQPIPRVEYME  
 EEKKTWGTVFKTLKSLYKTHACYEYNHIFP LLEKYCGFHEDNIPQLEDVSOFLQCTGFRLRPVA  
 GLLSSRDFLGGLAFRVFHCTQYIRHGSKPMYTPEPDICHELLGHVPLFSDRSFAQFSQEIGLASL  
 GAPDEYIEKLATIIYWFTVEFGLCKQGDSIKAYGAGLLSSFGELQYCLSEKPKLLPLELEKTAIQN  
 YTVTEFQPLYYVAESFNDAKEKVRNFAATIPRPFSVRYDPYTQRIEVL

>1XKWA

ESTSATQPPGVTTLGKVP LKPRELPQSASVIDHERLEQQNLFSLDEAMQQATGVTVQPFQLLTTA  
 YYVRGFKVDSFELDGV PALLGNTASSPQDMAIYERVEILRGSNGLLHGTGNPAATVNLVRKRPQR  
 EFAASTTLSAGRWDRYRAEVDVGGPLSASGNVRGRAVAAYEDRDYFYDVADQGTRLLYGVTEFDL  
 SPDTLLTVGAQYQHIDSITNMAGVPMKDGSNLGLSRD TYLDVDWDRFKWDTYRAFGSLEQQ LGG  
 GWKGVSAEYQEADSRLRYAGSFGAIDPQTGDGGQLMGAA YKFKSIQRSLDANLNGPVRLFGLTH  
 ELLGGVTYAQGETRQDTARFLNLPNTPVNVYRWDPHGVPRPQIGQYTS PGTTTTTQKGLYALGRI  
 KLAEP LTLVGGRESWWDQDTPATRFKPGRQFTPYGGLI WDFARDWSWYVSYAEVYQPQADRQ TW  
 NSEPLSPVEGKTYETG IKGELADGRNLNLSLAAFRIDLENNPQEDPDHPGPPNNPFYISGGKVR SQ  
 GFELEGTGYLTPYWSLSAGYTYTSTEY LKDSQNDSGTRYSTFTPRHLLRLWSNYDLPWQDRRWSV  
 GGG LQAQSDYSVDYRGVSMRQGGYALVNMRLGYKID EHWTA AVNVN NLFDRTY YQSLSNPNWNNR  
 YGEP RSFNVSLR GAF

>2EX4A

MGSSHHHHHSSGLVPRGSTSEVIEDEKQFY SKAKTYWKQIPPTVDGMLGGYGHISSIDINSSRK  
 FLQRFLREGPNKTGTSCALDCGAGIGRITKRLL LPLFREVDMDITEDFLVQAKTYLGEEGKRVR  
 NYFCCGLQDFTPEPDSYDVIWIQWVIGHLTDQH LAEFLRRCKGSLRPNGIIVIKDNMAQEGVILD  
 DVDSSVCRDL DVVRRRIICSAGLSLLAEERQENLPDEIYHVYSFALR

>1ZDQA

ATAAEIAALPRQKVELVDPPFVHAHSQVAEGGPKVVEFTMVIEEKKIVIDDAGTEVHAMAFNGTV  
 PGPLMVVHQDDYLELTLINPETNTLMHNIDFHAATGALGGGGLTEINPGEKTILRFKATKPGVFV  
 YHCAPPGMVPWHVVS GGNGAIMVLPREGLHDGKGKALTYDKIYYVGEQDFYVPRDENGKYKKEYA  
 PGDAYEDTVKVMRTLTPTHVVFNGAVGALTGDKAMTAAVGEKVLIVHSQANRDTRPHLIGGHGDY  
 VWATGKFNTPPDVDQETWFI PGGAAGAAFYTFQ QPGIYAYVNHNLIEAFELGAAAHFKVTGEWND  
 DLMTSVLAPSG

>3ME7A

MSLGTYPGDITLVDSYGNFQLKNLKGKPIILSPIYTHCRAACPLITKSLKVI PKLGTGPKDF  
 WVITFTFDPKDTLEDIKRFQKEYGIDGKGWVVKAKTSEDLFKLLDAIDFRFMTAGNDFIHPNVV  
 VVLSPELQIKDYIYGVN YNYLEFVNALRLARGE GHHHHHH

>2NT3A

GSHMSKKILIVESDTALSATLRSAL EGRGFTVDETTDGKGSVEQIRRRPDLVVLAVDLSAGQNG  
 YLICGK LKDDDLKNVPIV IIGNPDGFAQHRK LKAHADEAVAKPVDADQLVERAGALIGFPE

>1RFXA

SSMPLCPIDEAIDKKIKQDFNSLFPNAIKNIGLNCWTVSSRGKLASCPEGTAVLSCSCGSACGSW  
 DIREEKVCHCQCARIDWTAAR CCKLQVAS

>1C7JA

MTHQIVTTQYGVKGT TENGVHKWGI PYAKPPVGQWRFKAPEPEVWEDVLDATAYGPVCPQPS  
 DLLSLSYTELPRQSEDCLYVNVFAPDTPSQNL PVMVWIHGGA FYLGAGSEPLYDGSKLAAQGEVI  
 VVTLNYRLGPF GFMHLSSFDEAYS DNGLLLDQAAALKWVRENI SAFGGDPDNVTVF GESAGGMSI

AALLAMPAAKGLFQKAIMESGASRTMTKEQAASTAAAFQVLGINESQLDRDLHTVAAEDLLKAAD  
 QLRIAEKENIFQLFFQPALDPKTLPEEPEKSI AEGAASGI PLLIGTTRDEGYLFFTS DSDVRSQE  
 TLDAALEYSLGKPLAEKAADLYPRSLESQIHMVTDLLFWRPAVAFASAQSHYAPVWMYRFDWHPE  
 KPPYNKAFHALELPFVFGNLDGLERMAKAEITDEVKQLSHTIQSAWITFAKTGNPSTEAVNWPAY  
 HEETRETVIDSEITIENDPESEKRQKLFPSKGE

>1H0HB

SKGFFVDTRCTACRGCQVACKQWHGNPATPTENTGFHQNPPDFNFHTYKLVRMHEQEIDGRIDW  
 LFFPDQCRHCIAPPCKATADMEDESAI IHDDATGCVLFTPKTKDLEDYESVI SACPYDVPRKVAE  
 SNQMAKCDMCIDRITNGLRPACVTSCPTGAMNFGDLSEMEAMASARLAEIKAAYS DAKLCDPDDV  
 RVI FLTAHNPKLYHEYAVA

>1ZE3D

DLYFNPRFLADDPQAVADLSRFENGQELPPGTYRVDIYLNNGYMATRDVTFNTGDSEQGI VPCLT  
 RAQLASMG LNTASVAGMNL LADDACVPLTTMVQDATAHL DVGQQRLNLTIPQAFMSNRAR

>1UHAA

APECGERASGKRCPNGKCCSQWGYCGTTDNYCGQCQSQCDYWRGRDFGGRLCEEDMCCSKYGW  
 CGYSDDHCE DGCQSQCD

>1J8MF

SKLLDNLRDTRKFLTGSSSYDKAVEDFIKELQKSLISADVNVKLVFSLTNKIKERLKNEKPPTY  
 IERREWF IKIVYDELSNLFGGDKPEKVI PDKIPYVIMLVGVQGTGKTTTAGKLAYFYKKKGFKVG  
 LVGADVYRPAALEQLQQLGQQIGVPVYGEPEKDVVGI AKRGVEKFLSEKMEI IIVDTAGRHYG  
 EEAALLEEMKNIYEAIKPDEVTLVIDASIGQKAYDLASKFNQASKIGTIIITKMDGTAKGGALS  
 AVAATGATIKFIGTGEKIDELEVFNPRRFVARLHHHH

>3K8GA

GSGAWKASVDPLGVVSGADVLYFPVAGNENLISRI IENHESKADIKKIVDRTTAVYGAFFARS  
 KEFRLFGSGSYPYAFTNLI FSRSDGWASTKTEHGITYYESEHTDVSIPAPHFSCVIFGSSKRERM  
 SKMLSRLVNPDRPQLPPRFEKECTSEGTSQTVALYIKNGGHFITKLLNFPQLNLPLGAMELYLTA  
 RRNEYLYTSLQLGNAKINFPIQFLISRVLNAHIHVEGDRLI IEDGTISAERLASVISSLYSKKG  
 SS

>2B1LA

MQFYQADVLTQGKPVLLNVWATWCPTCRAEHQYLNQLSAQGIRVVMNYKDDRQKAI SWLKELGN  
 PYALS LFDGDGMLGLDLGVYGAPETFLIDNGI IRYRHAGDLNPRVWEEIEKPLWEKYSKEAAQ

>2ZZ3A

GSHMRSRRVDVMDVMNRLILAMDLMNRDDALRV TGEVREYIDTVKIGYPLVLSEGMDI IAEFRKR  
 FGCRI IAAFKVADI PETNEKI CRATFKAGADAI IVHGFPGADSVRACLNVAEEMGREVFLLEMS  
 HPGAEMFIQGADEI ARMGVDLGVKNYVGPSTRPERLSRLREI IGQDSFLISPGVGAQGDPGET  
 LRFADAI IVGRSIY LADNPAAAAAGI IESIKDLRIPEDPAANKARKEAELAAATAEQ

>3GY1A

MSLEPTIITDVL CYITKPDRHNLVVVKVETNKG IYGLGCATFQQRPKAVSLVVSEY LKPILIGRD  
 ANNIEDLWQMMM VNSYWRNGPILNNAISGVDMALWDIKGKLANMP LYQLFGGKSRDAIAAYTHAV  
 ADNLEDLYTEIDEIRKKG YQH IRCQLGFYGGNSSEFHTTDNPTQGSYFDQDEYMR TTVSMFSSLR  
 EKYG YKFHILHDVHERLFPNQAVQFAKDVEKYKPYFIEDILPPDQNEWLGQIRSQTSTPLATGEL  
 FNNPMEWKSLIANRQVDFIRCHVSQIGGITPALKLGLSLCAA FGVRIAWHTPSDITPIGVAVNIHL  
 NINLHNAAIQENIEINDNTRCVFSGIPEAKNGFFYPIESPGIGVDIDENEI IKYPVEYRPHEWTQ  
 SRIPDGTIVTEGHHHHHH

>1XMZA

MRGSHHHHHHGSASFLKKTMPFKTTIEGTVNGHYFKCTGKGEKNPFEGTQEMKIEVIEGGPLPFA  
 FHILSTSCXSKTFIKYVSGIPDYFKQSFPEGFTWERTTTTYEDGGFLTAHQDTSLDGDCLVYKVKI  
 LGNNFPADGPMQNKAGRWEFGTEIVYEVDGVLRGQSLMALKCPGGRHLTCHLHTTYRSKKPASA  
 LKMPGFHFEDHRIEIMEEVEKKGKCYKQYEAAVGRYCDAAAPSKLGHN

>2P35A

QGHMAWSAQQYLKFEDERTRPARDLLAQVPLERVLNGYDLGCGPGNSTELLTDYGVNVITGIDS  
 DDDMLEKAADRLPNTNFGKADLATWKPAQKADLLYANAVFQWVPDHLAVLSQLMDQLESGGVAV  
 QMPDNLQEPHIAMHETADGGPWKDAFSGGLRRKPLPPPSDYFNALSPKSSRVVWHTVYNHPM  
 KDADSIWEVWKTGLRPYLAAGEENREAFADYTRRIAAAAPPADGRLLLLRFPRLFVAVVK

>2P3JA

VLDGPYQPTTFNPPVDYWMLLAPTAAGVVVEGTNNTDAWLATILVEPNVTSETRSYTLFGTQEIQI  
 TIANASQTQWKFIDVVKTTQNGSYSQYGPLQSTPKLYAVMKHNGKIYTYNGETPNVTTKYYSTTN  
 YDSVNMTAFCDFYIIPREESTCTEYINNGL

>2OFXA

QGHMATNVTYQAAHVSRNKRQVVGTRGGFRGCTVWLTGLSGAGKTTVSMALLEEYLVCHGIPCYT  
 LDGDNIRQGLNKNLGFSPEDREENVRRIAEVAKLFADAGLVCITSFISPYTQDRNNARQIHEGAS  
 LPFFEVFVDAPLHVCEQRDVKGLYKKARAGEIKGFTGIDSEYEKPEAPELVLKTDSCDVNDVQVQ  
 VVELLQERDIVP

>2QZIA

GHMSGSLARAAARNAPTLDVDEATVDDFIAHSGKIVVLFVRGDAVRFPEAADLAVVLPPELINAFP  
 GRLVAAEVAEEAERGLMARFGVAVCPSLAVVQPERTLGVIAKIQDWSSYLAQIGAMLAEVDQVGE  
 AELQSGS

>2J9FA

SSLDDKPQFPGASAEFIDKLEFIQPNVISGIPYRVMRQGGQIINPSEDPHLPKEKVLKLYKSMT  
 LLNTMDRILYESQRQGRISFYMTNYGEEGTHVGSAAALDNTDLVFGQYREAGVLMYRDYPLELFM  
 AQCYGNISDLGKGRQMPVHYGCKERHFVTISSPLATQIQAVGAAYAANKRANANRVVICYFGEA  
 ASEGDAHAGFNFAATLECPPIIFFCRNNGYAI STPTSEQYRGDIAARGPGYGIMSIRVDGNDVFA  
 VYNATKEARRRAVAENQPFLIEAMTYRIGHHSTSDSSAYRPVDEVNYWDKQDHPISRHRHYLLS  
 QGWWDDEEQEKAWRKQSRKVMFAFEQAERKPKPNPNNLFSVDVYQEMPAQLRKQQESLARHLQTYG  
 EHYPLDHFDFK

>3BB0A

MGSVTPPIPLPKIDEPEEYNTNYILFWNHVGLLELNRVTHTVGGPLTGPPLSARALGMLHLAIHDAY  
 FSICPPTDFTTFLSPDTENAAAYRLPS PNGANDARQAVAGAALKMLSSLYMKPVEQPNPNPGANIS  
 DNAYAQLGLVLDLRSVLEAPGGVDRESASFMGEDVADVFFALLNDPRGASQEGYHPTPGRYKFDD  
 EPTHPVVLIPVDPNNPNGPKMPFRQYHAPFYGKTTKR FATQSEHFLADPPGLRSNADETAEYDDA  
 VRVAIAMGGAQALNSTKRSWPQTAQGLYWAYDGSNLIGTPPRFYNQIVRRIAVTYKKEEDLANSE  
 VNNADFARLFALVDVACTDAGIFSWKEKWEFEFWRPLSGVRDDGRPDHGDPFWLT LGAPATNTND  
 IPFKPPFPAYPSGHATFGGAVFQMVRRYNGRVGTWKDDEPDNIAIDMMISEELNGVNRDLRQPY  
 DPTAPIEDQPGIVRTRIVRHFD SAWELMFENAI SRI FLGVHWRFDAAAARDILIP TTTKDVYAVD  
 NNGATVFNVEDIRYTTTRGTREDREGLFPIGGVPLGIEIADEIFNNGLKPTPPEIQPMPQETPVQ  
 KPVGQQPVKGMWEEEQAPVVKEAP

>3H9CA

TQVAKKILVTCALPYANGSIHLGHMLEHIQADVWVRYQRMRGHEVNFICADDAHGTPIMLKAQQQL

GITPEQMIGEMSQEHQTDFAFNFISYDNYHSTHSEENRQLSELIYSRLKENGFIKNRTISQLYDP  
 EKGMFLPDRFVKGTCPKCKSPDQYGDNCEVCGATYSPTLIEPKSVVSGATPVMRDSEHFFFDLP  
 SFSEMLQAWTRSGALQEQVANKMQEWFESGLQQWDISRDPYFGFEIPNAPGKYFYVWLDAPIGY  
 MGSFKNLCDKRGDSVSFDEYWKKDSTAELYHFYFGKDIVYFHSFWPAMLEGSNFRKPSNLFVHGY  
 VTVNGAKMSKSRGTFIKASTWLNHFADSLRYYTAKLSSRIDDLNLEDFVQRVNADIVNKVV  
 NLASRNAGFINKRFDGLVASELADPQLYKFTTDAAEVIGEAWESREFGKAVREIMALADLANRYV  
 DEQAPWVVAKQEGRDADLQAI CSMGINLFRVLMTYLKPVLPLKTERAEAFNLNTELTWDGIQQPLL  
 GHKVNPFKALYNRIDMRQVEALVEASK

>2FHLA

ARKCSLTGKWTNNLGSIMTIRAVNSRGEFTGTYLTAVADNPGNITLSPLLGIQHKRASQPTFGFT  
 VHWNFSESTTVFTGQCFIDRNGKEVLKTMWLLRSSVNDISYDWKATRVGYNNFTRLS

>2PRVA

GMIYSKVENFINENKQNAIFTEGASHENIGRIEENLQCDLPNSYKWFLEKYGAGGLFGVLVLGYN  
 FDHASVVNRTNEYKEHYGLTDGLVVIDVDYFAYCLDTNKMKGECPPVEWDRVIGYQDTVADSF  
 IEFFYNKIQEAKDDWDEDEDWDD

>1JLJA

MATEGMILTNDHQIRVGLTVSDSCFRNLAEDRSGINLKDVLVQDPSLLGGTISAYKIVPDEIEE  
 IKETLIDWCDEKELNLILTGGTGAFAPRDVTPPEATKEVIEREAPGMALAMLGSLNVTPLGMLSR  
 PVCGIRGKTLIINLPGSKKGSQECFQFILPALPHAIDLRLDAIVKVKEVHDRSHHHHHH

>1XFIA

SESDSEMVPFPQLPMPIENNYRACTIPYRFPSSDDPKKATPNEISWINVFANSIPSFKKRAESDIT  
 VPDAPARAEEKFAERYAGILEDLKKDPESHGGPPDGILLCRLREQVLRELGFDRDIFKKVKDEENAK  
 AISLFPQVVSLSDAIEDDGKRLLENLVRGIFAGNIFDLGSAQLAEVFSRDGMSFLASCQNLVPRPW  
 VIDDLENFQAKWINKSWKKAVIFVDNSGADIILGILPFARELLRGAQVVLAAANELPSINDITCT  
 ELTEILSQLKDENGQLLGVDTSKLLIANSNDLPVIDLSRVSQELAYLSSDADLVIVEGMGRGIE  
 TNLYAQFKCDLKI GMVKHLEVAEFLGGRLYDCVFKFNEVQS

>1KZ1A

MFSGIKGNPSDLKGPRLILIVHARGNLQAI EPLVKGAVETMIEKHDVKLENIDIESVPGSWEL  
 PQGIRAS IARNTYDAVIGIGVLIKGSTMHFEYI SEAVVHGLMRVGLD SGVPVILGLLTVLNEEQA  
 LYRAGLNGHNGNDWGSAAVEMGLKALY

>2WL5A

STPSIVIASAARTAVGSFNGAFANTPAHEL GATVISAVLERAGVAAGEVNEVILGQVLPAGEGQN  
 PARQAAMKAGVPQEATAWGMNQLCGSGLRAVALGMQQIATGDASII VAGGMESMSMAPHCAHLRG  
 GVKMGDFK MIDTMIKDGLTDAFYGYHMGTTAENVAKQWQLSRDEQDAFAVASQNKAEAAQKDRF  
 KDEIVPFIVKGRKGDITVDADEYIRHGATLDSMAKLRPAFDKEGTVTAGNASGLNDGAAAALLMS  
 EAEASRRGIQPLGRIVSWATVGVDPKVMGTGPI PASRKALERAGWKIGDLDLVEANEAFAAQACA  
 VNKDLGWDP SIVNVNGGAI AIGNPIGASGARILNTLLFEMKRRGARKGLATLCIGGMGVAMCIE  
 SL

>1E2XA

FADRMVIAKQSPAGFAEEYII ES IWNRFPPGTILPAERELSELIGVTRTTTLREVLQRLARDGWL  
 TIQHGKPTKVNFWETSGLNILETLARLDHESVPQLIDNLLSVRTNISTIFIRTAFRQHPDKAQE  
 VLATANEVADHADAFaelDYNIFRGLAFASGNPIYGLILNGMKGLYTRIGRHYFANPEARSLALG  
 FYHKL SALSCEGAHDQVYETVRRYGHESGEIWHRMQKNLPGDLAIQGR

>2O7IA

MQVSLPREDTVYIGGALWGPATWNLVYAPQSTWGTDQFMYLPAFQYDLGRDAWIPVIAERYEFVD  
 DKTLRIYIRPEARWSDGVPITADDFVYALELTKELGIGPGGGWDTYIEYVKAVDTKVVEFKAKEE  
 NLNYFQFLSYSLGAQMPKHYERIRAQMNIKDWINDKPEEQVVSQPYKLYYYDPNIVVYQRVDD  
 WWGKDIFGLPRPKYLAHVYKDNPSASLAFERGDIDWNGLFIPSVWELWEKKGLPVGTWYKKEPY  
 FIPDGVGFVYVNNTKPLSDPAVRKAIAYAI PYNEMLKAYFGYGSQAHPMSVIDLFEFYKQYID  
 YELAKKTFGTEDGRIPFDLDMANKILDEAGYKKGPDGVRVGPDTGLGPTYTISVPYGWTDWMMMC  
 EMIAKNLRSIGIDVKTEFPDFSVWADRMTKGTFDLII SWSVGPSFDHFPNIYRFVLDKRLSKPVG  
 EVTWAGDWERYDNDEVVELLDKAVSTLDPEVRKQAYFRIQQIIYRDMPSIPAFYTAHWYESTKY  
 WINWPSEDNPAWFRPSPWHADAWPTLFIISKKSDPQVPVPSWLGTVDEGGIEIPTAKIFEDLQKAT  
 MHHHHHH

>1YU0A

MSTAVQFRGGTTAQHATFTGAAREITVDTDKNTVVVHDGATAGGFPLARHDLVKTAFIKADKSAV  
 AFTRTGNATASIKAGTIVEVNGKLVQFTADTAITMPALTAGTDYAIYVCDDGTVRADSNFSAPTG  
 YTSTTARKVGGFHYAPGSNAAAQAGGNTTAQINEYSLWDIKFRPAALDPRGMTLVAGAFWADIYL  
 LGVNHLTDGTSKYNVTIADGSASPCKSTKFGGDGSAAYS DGAWYNFAEVMTHHGKRLPNYNEFQA  
 LAFGTTEATSSGGTDVPTTG VNGTGATSAWNIFTSKWGVVQASGCLWTWGNEFFGGVNGASEYTAN  
 TGGRGSVYAQPAAALFGGAWNGTSLSGSRAALWYSGPSFSFAFFGARGVCDHLILE

>1YUKA

QECTKFKVSSCRECIESGPGCTWCQKLNFTGPGDPDSIRCDTRPQLLMRGCAADDIMDPTSLAET  
 QEDHNGGQKQLSPQKVTLYLRLPGQAAAFNVTFRRAKGY

>2QNDA

ASRFHEQFIVREDLMGLAIGTHGANIQQARKVPGVTAIDLDEDCTCFHIYGEDQDAVKKARSFLE  
 FAEDVIQVPRNLVGKVIKNGKLIQEIVDKSGVVRVRIEAENEKNVPQEEGMVFPVFGTKDSIA  
 NATVLLDYHLNLYLK

>3EOFA

GMMDTVKNRRTIRKYQQKDITPDLLNDLLET SFRASTMGGMQLYSVVVTRDAEKKEILSPAHFNQ  
 PMVKEAPVVLTFCADFRFRCKYCQERNVPGYGNLMSFLNAAMD TLLVAQTFCTLAE EAGLGICY  
 LGTTTTYNPQMIIDALHLPELVFPITTVTVGYPAESPKQVDRLP IEGIIHEESYHDYTAEDINRLY  
 AYKESLPENKLFIEENQKETLPQVFTDVRVYTKKDNFMS ENLLKVLRRQGFM D

>2GRRA

GSHMSGIALSRLAQERKAWRKDHPFGFVAVPTKNPDGTMNLMNWECAIPGKKGTPWEGGLFKLRM  
 LFKDDYPSSPPKCKFEPPLFHPNVYPSGTVCLSILEEDKDWRPAITIKQILLGIQELLNEPNIQS  
 PAQAEAYTIYCQNRVEYEKRVRAQAKKFAPS

>3EJVA

MGSDKIHNNNNHENLYFQGMTMADETIILNLVGLQYTRAHDRRDPDAMAALFAPEATIEIVDAVGG  
 ASRSISRLEGRDAIRVAVRQMMAPHGYRAWSQNVVNAPIIVIEGDHAVLDAQFMVFSILAAEVPD  
 GGWPTGTFGAQGRIVPIEAGQYRLTLRTVADGWVISAMRIEHRLPMAFG

>3GWBA

ELD GKAPSHRNLNVQ TWSTAEGAKVLFVEARELPMFDLRLIFAAGSSQDGNAPGVALLTNAMLNE  
 GVAGKDVGAIAQGFEG LGADFGNGAYKDMAVASLRSLSAVDKREPALKLFAE VVGKPTFPADSLA  
 RIKNQMLAGFEYQKQNPGLASLELMKRLYGTHPYAHASDGAKSIPPITLAQLKAFHAKAYAAG  
 NVVIALVGDLSRSDAEAIAAQVSAALPKGPALAKIEQPAEPKASIGHIEFPSSQTSMLLAQLGID  
 RDDPDYAAVSLGNQILGGGGFTRLMSEVREKRGLTYGVYSGFTPMQARGPFMINLQTRAEMSEG  
 TLKLVQDVFAEYLNKNGPTQKELDDAKREL AGSFPLSTASNADIVGQLGAMGFYNLPLSYLED FMR

QSQELTVEQVKAAMNKHLNVDKMVIVSAGPTVAQKPLEHHHHHH

>1GWA

MQLTPTFYDNPCPNVSNIVRDTIVNELRSDPRIAASILRLHFHDCFVNGCDASILLDNTTSFRTE  
 KDAFGNANSARGFPVIDRMKAAVESACPRTVSCADLLTIAAQQSVTLAGGPSWRVPLGRRDSLQA  
 FLDLANANLPAPFFTLPLQLKDSFRNVGLNRSSDLVALSGGHTFGKNQCRFIMDRLYNFSNTGLPD  
 PTLNNTTYLQTLRGLCPLNGNLSALVMDLRTPTIFDNKYVNLLEEQKGLIQSDQELFSSPNATDT  
 IPLVRSFANSTQTFNFAFVEAMDRMGNITPLTGTQGGQIRLNCRVVSNS

>1E39A

ADNLAEFHVQNQECDSCHTPDGELSNDSTLYENTQCVSCHGTLAEVAETTKHEHYNAHASHFPGE  
 VACTSCHSAHEKSMVYCDSCHSFDFNMPYAKKWLDRDEPTIAELAKDKSERQAALASAPHDTVDVV  
 VVGSGGAGFSAAISATDSGAKVILIEKEPVIIGNAKLAAGGMNAAWTDQQKAKKITDSEPELMFED  
 TMKGGQNINDPALVKVLSHSHKDSVDWMTAMGADLTDVGMMGGASVNRHRPTGGAGVGAHVQV  
 LYDNAVKRNIDLRMNTRGIEVLKDDKGTVKGILVKGMKGYVWKADAVILATGGFAKNNERVAK  
 LDPSLKGFIISTNQPGAVGDGLDVAENAGGALKDMQYIQAAPTLVKGGMVTEAVRNGAILVNR  
 EGKRFVNEITTRDKASAAILAQTGKSAYLIFDSDVRKSLSKIDKYIGLGVAPTADSLVKLGKMEG  
 IDGKALTETVARYNSLVSSGKDTDFERNLPRALNEGNYAIEVTPGVHHTMGGVMIDTKAEVMN  
 AKKQVIPGLYGAGEVTGGVHGANRLGNAISDIITFGRLAGEEAAKYSKKN

>3E3UA

MAVVP I R I V G D P V L H T A T T P V T V A A D G S L P A D L A Q L I A T M Y D T M D A A N G V G L A A N Q I G C S L R L F V  
 Y D C A A D R A M T A R R R G V V I N P V L E T S E I P E T M P D P D T D D E G C L S V P G E S F P T G R A K W A R V T G L D A D  
 G S P V S I E G T G L F A R M L Q H E T G H L D G F L Y L D R L I G R Y A R N A K R A V K S H G W G V P G L S W L P G E D P D P F  
 G H

>1E30A

GTLDTTWKEATLPQVKAMLEKDTGKVS GDTVTYSGKTVHVVA AVLPGFPPPSFEVHDKKNPTLE  
 IPAGATVDVTFINTNKGFGHSFDITKKGPPYAVMPVIDPIVAGTGFSPVPKDGKFGYTNFTWHPT  
 AGTYYYVCQIPGHAATGQFGKIVVK

>3K2CA

MAHHHHHHMGTLEAQTQGPMSMAKEASGNVYFDVYANEE SLGRIVMKLEDDIVPKTAKNFRTLCE  
 RPKGEGYKGSTFHRIIPGFMVQGGDYTAHNGTGGRS IYGEKFPDENFELKHTKEGILSMANCGAH  
 TNGSQFFITLTKTQWLDEKHVVFGVEVGMVHVHKI AKYGSSESGVKKGYRIEIRDCGVLGSN

>2R1BA

GSSLRGGHAGTTYIIFSKGGGQITYKWPPNDRPSTRADRLAIGFSTVQKEAVLVRVDSSSGLGDYL  
 ELHIHQGKIGVKNVGTDDIAIEESNAIINDGKYHVVRFRTRSGGNATLQVDSWPVIERYPAGNND  
 NERLAIARQRIPYRLGRVVDEWLLDKGRQLTIFNSQATI IIGGKEQGQPFQGGQLSGLYINGLKV  
 NMAAENDANIAIVGNVRLVGEVPSS

>1I9YA

YDPIHEYVNHELKRENEFSEHKNVKIFVASYNLNGCSATTKLENWLF PENTPLADIYVVGFOEI  
 VQLTPQQVISADPAKRREWESCVKRLNKGKCTSGPGYVQLRSGQLVGTALMIFCKESCLPSIKNV  
 EGTVKKTG LGGVSGNKGAVAIRFDYEDTGLCFITSHLAAGYTN YDERDHDYRTIASGLRFRRGRS  
 IFNHDIYVWFGDFNYRISLTYEEVPCIAQGKLSYLF EYDQLNKQMLTGKVFPPFFSELPIITFPPT  
 YKFDIGTDIYDTSKHRVPAWTDRIILYRGELVPHSYQSVPLYYS DHRPIYATYEANIVKVDREKK  
 KILFEELYNQRKQEV RDASQTS

>10AIA

PTLSPEQQEMLQAFSTQSGMNLEWSQKCLQDNNWDYTRSAQAFTHLKAKGEIPEVAFMK

>3C1JA

APAVADKADNAFMMICTALVLFMTIPGIALFYGGILIRGKNVLSMLTQVTVTFALVCILWVVYGYSLAFGEENNFFGNINWLMLKNIELTAVMGSIYQYIHVAFQGSAAACITVGLIVGALAERIRFSAVLIFVVVWLTLSYIPIAHMVWGGGLLASHGALDFAGGTVVHINAAIAGLVGAYLIGKRVGFGKEAFKPHNLPMVFTGTAILYIGWFGANAGSAGTANEIAALAFVNTVVATAAAAILGWIFGEWALRGKPSLLGACSGAIAGLVGVTPACGYIGVGGALIGVVAGLAGLVGVTMLKRLLRVDDPCDVFVGHVCGCIVGCIMTGIFAASSLGGVGFAGVMTMGHQLLVQLESIAITIVWSGVVAFIGYKLDLTVGLRVPEEQE  
REGLDVNSHGENAYNADQAQQAQADLEHHHHHH

>2C15A

MSFTPANRAYPYTRLRRNRDDFSRRLVRENVLTVDLILPVFVLDGVNQRESIPSMGVERLSIDQLLIEAEWVALGIPALALFPVTPVEKKSLEAAEAYNPEGIAQRATRALRERFPELGIITDVALDPFTTHGQDGIILDDDGIVLNDVSI DVLVRQALSHAEAGAQQVAPSDMMDGRIGAI REALESAGHTNVRVMAYSAKYASAYYGPFRDAVGSASNLGKGNKATYQMDPANSDEALHEVAADLAEGADMVMVXPGMPYLDIVRRVKDEFRAPTFVYQVSGEYAMHMGAIQNGWLAESVILESLTAFKRAAGADGILTYP  
AKQAAEQLRGR

>1QL3A

ADPAAGEKVF GKCKACHKLDGNDGVPHLNGVVGRTVAGVDGFNYS DPMKAHGGDWTPEALQEFLTNPKAVVKGTKMAFAGLPKIEDRANLIAYLEGQQ

>1CHMA

QMPKTLRIRNGDKVRSTFSAQEYANRQARLRAHLAAENIDAAIFTSYHNINYYSDFLYCSFGRPYALVVTEDDVISISANIDGGQPWRRRTVGTDNIVYTDWQRDNYFAAIQQALPKARRIGIEHDHLNLQNRDKLAARYPDAELVDVAAACMRMRMIKSAAEHVMIRHGARIADIGGAAVVEALGDQVPEYEVALHATQAMVRAIADTFEDVELMDTWTWFQSGINTDGAHNPVTRKVNKGDILSLNCFPMIAGYYTALERTLFLDHCSDDHLRLWQVNVEVHEAGLKLKPGARCSDIARELNEIFLKHVDLQYRTFGYGHSGTLSHYYGREAGLELREDIDTVLEPGMVVSMEPMIMLPEGLPGAGGYREHDILIVNENGAENITK  
FPYGPEKNIIR

>3CZVA

GSMSRLSWGYREHNGPIHWKEFFPIADGDQQSPIEIKTKEVKYDSSLRPLSIKYDPSSAKIISNSGHSFNVDFFDTENKSVLRGGPLTGSYRLRQVHLHWGSADDHGSEHIVDGVSYAAELHVHWNSDKYPSFVEAAHEPDGLAVLVGFVLFQIGEPNSQLQKITDITLDSIKEKQKQTRFTNFDLLSLLPPSWDYWTYPGSLTVPPLESVTWIVLKQPINISSQQALAKFRSLLCTAEGEAAFLVSNHRPPQPLKGRKVR  
ASFH

>1CZYA

AMADLEQKVLMEASTYDGVFIWKISDFPRKRQEAVAGRI PAIFSPAFYTSRYGYKMCLRIYLNGDGTGRGTHLSLFVVMKGPNDALLRWPFNQKVTMLLDQNNREHVIDAFRPDVTSSSFQRPVNDM  
NIASGCPLFCPVSKMEAKNSYVRDDAIFIKAIVDLTGL

>2V5IA

MVSVGDAAFRQEANKKFKYSVKLSDYSTLQDAVTDVAVDGLLIDINYNFTDGESVDFXGKILTINCKAKFIGDGALIFNNMGPGSVINQPFMESKTPWVIFPWDADGKWITDAALVAATLKQSKIIEGYQPGVNDWVKFPGLEALLPQNVKDQHIAATLDIRSASRVEIRNAGGLMAAYLFRSCHHCKVIDSDSII  
GGKDGIIITFENLSGDWGLGNYVIGGRVHYGSGSGVQFLRNNGGESHNGGVIIGVTSWRAGESGFKTYQGSVGGGTARNYNLQFRDSVALSPVWDGFDLGS DPGMAPEPDRPGDLPVSEYPFHQLPNNHLVD  
NILVMNSLGVGLGMDGSGGYVSNVTVQDCAGAGMLAHTYNRVFSNITVIDCNYNLNFSDQIIIIIG  
DCIVNGIRAAGIKPQPSNGLVISAPNSTISGLVGNVPPDKILVGNLLDPVLGQSRVIGFNSDTAE

LALRINKLSATLD SGALRSHLNGYAGSGSAWTELTALS GSTPNAVSLKVN RGDYKTTEIPI SGTV  
LPDEGVLDINTMSLYLDAGALWALIRLPD GSKTRMKLSV

>1YCLA

PSVESFELDHN AVVAPYVRHCGVHKVGT DGVVNKFDIRFCQPNKQAMK PDIHTLEHLLAFTIRS  
HAEKYDHFDI IDISPMGAQTGYLLVVS GEPTSAEIVD LLEDTMKEAVEITEI PAANEKQCGQAKL  
HDLEGAKRLMRFWLSQDKEELLK VFG

>2G8FA

GSHMAKEEIIWESLSVDVGSQGNPGIVEYKGVDTKTGEVLFEREPIPIGTNNMGEFLAIVHGLRY  
LKERN SRKPIYSDSQTAIKWVKDKKAKSTLVRNEETALIWKLVDEAE EWLNTHTYETPI LKWQTD  
KWGAIKADYGRK

>1G8KB

RTTLAYPATAVSVAKNLAANE PVSFTY PDTSSPCVAVKLGAPVPGGVPDDDIVAYSVLC THMGC  
PTS YDSSSKTFSCPFTEF DAEKAGQMICGEATADLPRVLLRYDAASDAL TAVGVDGLIYGRQA  
NVI

>2NS9A

SLRLHAGVWGLKVRYEGSFEVSKTPEEVFEFLTDPKRFSRAFPGFKSVEVEDGSFTIELR LSLGP  
LRGDARVRASFEDLEKPSKATVKGSGRGAGSTLDFTLRFAVEPSGGGSRVSWVFEGNVGGLAASM  
GGRVLDLARRMINDVISGVKRELGEA

>2V9MA

MQNITQSWFVQGMIKATTD AWLKGWDERNGGNLTLRLDDADIAPYHDNFHQPPRYIPLSQPMPLL  
ANTPFIVTGS GKKFRNVQLDPMANLGIVK VSDGAGYHILWGLFNEAVPTSELPAHF LSHCERIK  
ATNGKDRVIMHCHATNLIALTYVLENDTAVFTRQLWEGSTECLVVPDGVGILP WMPVPGTDAIGQ  
ATAQEMQKHS LVLWPFHGVFGSGPTLDET FGLIDTAEKSAQVLVKVYSMGMKQTISR EELIALG  
KRFGVTPLASALAL

>2QIQA

AGFRKMAFPSGKVEGCMVQVTCGTTTLNGLWLD DTVYCPRHVICTAEDMLNPNYEDLLIRKSNHS  
FLVQAGNVQLRVIGHSMQNCLLRLKVDTSNPKTPKYKFVRIQPGQTF SVLACYNGSPSGVYQCAM  
RPNHTIKGSFLNGSCG SVGFNIDYDCVSFCYMHMELPTGVHAGTDLEGKFYGPVDRQTAQAAG  
TDTTITLNLVLA WLYAAVINGDRWFLNRFTTTLNDFNLVAMKYNYEPLTQDHVDILGPLSAQTGIA  
VLDMCAALKELLQNGMNGRTIILGSTILEDEFTPF DVVRQCS

>2Z25A

TAPSQVLKIRRPDDWHLHLRDG DMLKTVVPYTSEIYGRAIVMPNLAPPVTTVEAAVAYRQRILDA  
VPAGHDFTPLMTCYLTDSLDPNELERGFNEG VFTA AKLYPANATVNSSHGVT SVDAIMPVLERME  
KIGMPLL VHGEVTHADIDI FDREARFIESVMEPLRQRLTALKVVF EHIITTKDAADYVRDGNERLA  
ATITPQHLMFN RNHMLVGGVRPHLYCLPILKRN IHQQALRELVASGFNRVFLGTDSAPHARHRKE  
SSCGCAGCFNAPTALGSYATVFEEMNALQHFEAFCSVNGPQFYGLPVNDTFIELVREEQQVAESI  
ALTD DTLVPFLAGETVRWSVKQ

>3NZNA

SNAVNLFQKDRGNHVS GVDRGKVI MYGLSTCVWCKKTKKLLTDLGVDFDYVYVDRLE GKEEEEEA  
VEEVRRFNPSVSFPPTTI INDEKAI VGFKEKEIRES LGF

>1YPQA

RVANCSAPCPQDWIWHGENCYLFSSGSFNWEKSQEKCLSLDAKLLKINSTADLDFIQQAISYSSF  
PFWMGLSRRNPSYPWLWEDG SPLMPHLFRVRGAVSQTYPSGTCAYIQRGAVYAENCILAAFSICQ  
KKANL



>3ENUA

TIEVPVLTFFVPVQVSAELENRGCWVKFFDKKNFQGDLSLFLSGPATLPRLIGPFGYDWENKVRSVK  
VGPRANLTI FDNHNYRDEDEKFLDAGANVANLSKEMGFFDNFRSMVLNCI

>3APAA

GSARSSSYSGEYGS GGKRF SHSGNQLDGPI TALRVRVNTYYIVGLQVRYGKVWSDYVGGRRNGDL  
EEIFLHPGESVIQVSGKYKWYLKKL VFTDKGRYLSFGKDSGTSFNAVPLHPNTVLR F ISGRSGS  
LIDAIGLHWDV

>2Q5XA

GIILTKVGYTIPSMDDLAKITNEKGE CIVSDFTIGRKGYSIYFEGDVNLTNLNLDDIVHIRRK  
E VVVYLD DNQKPPVGEGLNRKAEVTL DGVWPTDKTSRCLIKSPDRLADINYEGRLEAVSRKQGAQ  
FKEYRPETGSWVFKVSHFAKYGLQD

>2Q66A

KVFGITGPVSTVGATAAENKLNDSL IQELKKEGSFETE QETANRVQVLKILQELAQRFVYEVSKK  
KNMSDGMARDAGGKI FTYGSYRLGVHGP GSDIDTLVVVPHVTR E DFFTVFDSLLRERKELDEIA  
PVPDAFVPIIKIKFSGISIALICARLDQPQVPLSLT LSKNLLRNLD EKDLRALNGTRVTDEILE  
LVPKPNVFRIALRAIKLWAQRRAVYANIFGFP GGVAWAMLVARICQLY PNACSAVILNRFFIILS  
EWNWPQPVILKPIEDGPLQVRVWNPKIYAQDRSHRMPVITPAYPSMCATHNITESTKKVILQEFV  
RGVQITNDIFSNKSWANLFEKNDFFRYKFYLEITAYTRGSDEQHLKWSGLVESKVRLLVMKLE  
VLAGIKIAHPFTKPFESSYCCPTEDDYEMI QDKYGSHKTETALNALKLVTDENKEEESIKDAPKA  
YLSTMYIGLDFNIENKKEKVDIHIPCTEFVNL CRSFNEDYGDHKVFNLALRFVKGYDLPDEFVDE  
NEKRP

>1DQEA

SQEV MKNLSLNF GKALDECKKEMTLTDAINEDFY NFWKEGYEIKNRETGCAIMCLSTKLNMLDPE  
GNLHHGNAMEFAKKHGADE TMAQQLI DIVHGCEKSTPANDDKCIWTLGVATCFKAEIHKLNWAPS  
MDVAVGE

>1PC5A

MAFVVTDNCIKCKYTDCEVCPVDCFYEGPNFLVIHPDECIDCALCEPECGAQAI FSEDEVPEDM  
QEFIQ LNAELAEVWPNI TEKKDPLPDAEDWDG VKGKQLQHLE R

>2FW6A

MMSETAPLPSASSALEDKAASAPVVG IIMGSQSDWETMRHADALLTELEIPHETLIVSANRTPDR  
LADYARTAAERGLNVI IAGAGGAAHLPGMCAAWTRLPVLGVPVESRALKGMSLLSIVQMPGGVP  
VGT LAIGASGAKNAALLAASILALYNPALAARLETWRALQTASVPNSPIT EDK

>2QQRA

GHMQSITAGQKVISKHKNR FYQCEVRLTTET FYEVNFDDGSFSDNLYPEDIVSQDCLQFGPPA  
EGEVVQVRWTDGQVYGAKFVASHPIQMYQVE FEDGSQLVVKRDDVYTLDEELP

>1BF6A

SFDPTGYTLAHEHLHIDL SGFKNNVDCRLDQYAFICQEMNDL MTRGVRNVIEMTNRYMGRNAQFM  
LDVMRETGINVACTGYYQDAFFPEHVATRSVQELAQEMVDEIEQQIDGTELKAGIIAEIGTSEG  
KITPLEEKVFI AAALAHNQTGRPISTHTSFSTMGLEQLALLQAHGVDLSRVTVGHCDLKDNL DNI  
LKMIDL GAYVQFDTIGKNSYYPDEKRIAMLHALRDRGLLN RVMLSM DITRRSHLKANGGYGYDYL  
LTTFI PQLRQSGFSQADVDVMLRENPSQFFQ

>3AHYA

MHHHHHMLPKDFQWGFATAAYQIEGAVDQDGRGPSIWDTFCAQPGKIADGSSGVTACDSYNRTA  
EDIAL LKSLGAKSYRFSISWSRI IPEGGRGDAVNQAGIDHYVKFVDDLLDAGITPFITLFWHDL P

EGLHQRYGLLNRTEFPLDFENYARVMFRALPKVRNWI TFNEPLCSAIPGYGSGTFAPGRQSTSE  
 PWTVGHNILVAHGRAVKAYRDDFKPASGDGQIGIVLNGDFTYPWDAADPADKEAAERRLEFFTAW  
 FADPIYLGDPASMRKQLGDRLPTFTPEERALVHGSNDFYGMNHYTSNYIRHRSSPASADDTVGN  
 VDVLFTNKQGNICIGPETQSPWLRPCAAGFRDFLVWISKRYGYPPIYVTENGTSIKGESDLPKEKI  
 LEDDFRVKYNEYIRAMVTAVELDGVNVKGYFAWSLMDNFEWADGYVTRFGVTTYVDYENGQKRFP  
 KKSASLKLPLFDELIAAA

>2AHEA

MALSMPLNGLKEEDKEPLIELFVKAGSDGESIGNCPFSQRLFMILWLKGVVFSVTTVDLKRKPAD  
 LQNLAPGTHPPFITFNSEVKTVDNKEEFLEEVLCPPKYLKLSPKHPESNTAGMDIFAKFSAYIK  
 NSRPEANEALERGLLKTQLKDEYLN SPLDEIDENSMEDIKFSTRKFLDGNEMTLADCNLLPKL  
 HIVKVVAKYRNFDIPKEMTGIWRYLTNAYS RDEFTNTCPSDKEVEIAYS DVAKRLPSKVPKGEF  
 QHTGGRY

>1OX3A

ADIVLNDLPFVDGPPAEGQSRI SWIKNGEEILGADTQYGSEGSMNRPTVSVLRNVEVLDKNIGIL  
 KTSLETANS DIKTIQEAGYIPEAPRDGQAYVRKDG EWVLLSTFL

>1QZ0A

MRERPHTSGHHGAGEARATAPSTVSPYGPPEARAE LSSRLTTLRNTLAPATNDPRYLQACGGEKLN  
 RFRDIQCRRTAVRADLNANYIQVGNTRTIACQYPLQS QLESHFRMLAENRTPVLAVLASSSEIA  
 NQRFGMPDYFRQSGTYGSITVESKMTQQVGLGDGIMADMYTLTIREAGQKTI SVPVVHVGNWPDQ  
 TAVSSEVTKALASLVDQTAETKRNMYESKSSAVADDSKLRPVIHCRAGVGRTAQLIGAMCMNDS  
 RNSQLSVEDMVSQMRVQRNGIMVQKDEQLDVLIKLAEGQGRPLLNS

>1LT4A

NGDRLYRADS RPPDEIKRSGGLMPRGHNEYFDRGTQMNINLYDHARGTQTGFVRYDDGYVSTKLS  
 LRSAGLAGQSILSGYSTYYIYVIATAPNMFVNVDVLGVYSPHPYEQEVSALGGIPYSQIYGWYRV  
 NFGVIDERLHRNREYRDRYRNLNIA PAEDGYRLAGFPDPHQAWREEPWIHHAPQCGNSSNSSR  
 TITRTITGDTCNEETQNLSTIYLREYQSKVKRQIFSDYQSEVDIYNRIRDEL

>1OCBA

YNGNPFEGVQLWANNYYRSEVHTLAI PQITDPALRAAASAVA EVPSFQWLDNRNVTVDTLVQTL S  
 EIREANQAGANPQYAAQIVVYDLPDRDCAAAA SNGEWAIANNGVN NYKAYINRIREILISFSDVR  
 TILVIEPDSL ANMVTNMNVPKCSGAASTYRELTIYALKQLDLPHVAMYMDAGHAGWLGWPANIQP  
 AAELFAKIYEDAGKPRAVRGLATNVANYNAWSVSSPPPYTSPNP NYDEKHYIEAFRPLLEARGFP  
 AQFIVDQGRSGKQPTGQKEWGHWCNAIGTGFGMRPTANTGHQYVDAFVWVKPGGECGTS DTTAA  
 RYDYHCGLEDALKPAPEAGQWFNEYFIQLLRNANPPF

>3OCCA

MATPHINAEMGDFADV LMPGDPLRAKFIAETFLQDVREVN NVRGMLGFTGTYKGRKISVMGHGM  
 GIPSCSIYAKELITDFGVKKIIRVGSCGAVRTDVKLRDVVIGM GACTDSKVNRMRFKDHDYAAIA  
 DFEMTRNAVDAAKAKGVNVRVGNLFSADLFYTPDPQMF DVMEKYGILGVEMEAAGIYGVAAEFGA  
 KALTICTVSDHIRTGEQT TAAERQTTFNDMIEIALESVLLGDNA

>1ZCJA

ASGQAKALQYAFFAEKSANKWSTPSGASWKTASAQP VSSVGLGLGTMGRGIAISFARVGISVVA  
 VESDPKQLDAKKIITFTLEKEASRAHQNGQASAKPKLRFSSSTKELSTVDLVVEAVFEDMNLKK  
 KVFAELSALCKPGAFLCTNTSALNVDDIASSTDRPQLVIGTHFFSPA HVMRLLEVIPSRYSSTPT  
 IATVMSLSKKIGKIGVVVGN CYGFVGNRMLAPYYNQGF FLEEGSKPEDVDGVLEEF GFKMGPF R  
 VSDLAGLDVGWKIRKGQGLTGPSLPPGTPVRKRGNRSRYSPLGDMLCEAGRFGQKTGKGWYQYDKP

LGR IHK PDPWLSTFLSQYREVHHIEQRTISKEEILERC LYS LINEAFRILEEGMAARPEHIDVIY  
 LHGYGWPRHKGGPMFYAASVGLPTVLEK LQKYRQNPDI PQLEPSDYLRRLVAQGS PPLKEWQSL  
 AGPHGSKL

>1LVMA

GHHHHHHHGESL FKGPRDYNPISSTICHLTNE SDGHTTSLY GIGFGPFIITNKHLFRNNGTLLV  
 QSLHG VFKVKN TTTLQOHLIDGRDMI IIRMPKDFPPFPQKLFREPQREERICLVTTNFQTKSMS  
 SMVSDT SCTFPSSDGI FWKHWIQTKDGQCGSPLVSTRDGFIVGIHSASNFTNTNNTNYFTSVPKNFM  
 ELLTNQEAQQWVSGWRLNADSVLWGGHKVFMDKP

>1E0WA

AESTLGAAAQSGRYFGTAIASGR LSDSTYTSIAGREFNMVTAENEMKIDATEPQRGQFNFSAD  
 RVYNWAVQNGKQVRGHTLAWHSQQPGWMQSLSGSALRQAMIDHINGVMAHYK GKIVQWDVVNEAF  
 ADGSSGARRDSNLQRSGNDWIEVAFR TARAADPSAKLCYNDYNVENWTWAKTQAMYNMVRDFKQR  
 GVPIDCVGFQSHFNSGSPYNSNFR TTLQNFAALGVDVAITELDIQGAPASTYANVTNDCLAVSRC  
 LGITVWGV RDSDSWRSEQTPLL FNNDGSKKAAYTAVLDALNGGDSSEPPADGG

>3EMHA

GPLGSPEFQSKPTPVKPNYALKFTLAGHTKAVSSVKFSPNGEWLASSADKLIKIWGAYDGKFEK  
 TISGHKLGISDVAVSSDSNLLVSASDDKTLKIWDVSSGKCLKTLKGHSNYVFCCNFNPQSNLIVS  
 GSFDES VRIWDVKTGKCLKTLPAHSDPVS AVHFNRDGLIVSSSYDGLCRIWDTASGQCLKTLID  
 DDNPPVSFVKFSPNGKYILAATLDNTLKLWDYSKGKCLKTYTGHKNEKYCIFANFSVTGGKWIIVS  
 GSEDNLVYIWNLQTK EIVQKLQGH TDVVI STACHPTENI IASAALENDKTIK LKWSDC

>3G5JA

SNAMSVIKIEKALKL DKVIFVDVRTEGEY EEDHILNAINMPLFKNNEHNEVGTIYKMQ GKHEAIQ  
 KGF DYVS YKLDIYLQAAELALNYDNIVIYCARGGMRSGSIVNLLSSLGVNVYQLEGGYKAYRNF  
 VLEY

>3B7AA

MTMEQFLTSLDMIRSGCAPKFKLKTEDLDRLRVGDFNFPPSQDLMCYTKCVALMAGTVNKKGEFN  
 APKALAQPLPHLVPEMEMSRKSVEACRDTHKQFKESCERVYQTAKCFSENADGQFMWP

>3B7CA

GMPTDDIVQLLKGQEEAWN RGDLDAYMQGYWQNEQLMLISNGKFRNGWDETLAAYKKNYPDKESL  
 GELKFTIKEIKMLS NYAAMVVGRWDLKRLKDTPTGVFTLLVEKIDDRWVITMDHSSD

>2AD6A

DADLDKQVNTAGAWPIATGGYYSQHNSPLAQINKSNVKNVKAWSFSTGVLNGHEGAPLVIGDMM  
 YVHSAFPNNTYALNLNDPGKIVWQH KPKQDASTKAVMCCDVDRGLAYGAGQIVKKQANGHLLAL  
 DAKTGKINWEVEVCDPKVGSTLTQAPFVAKD TVLMGCSGAELGVRGAVNAFDLKTGELKWRAFAT  
 GSDDSVRLAKDFNSANPHYGQFGLGKTWEGDAWKIGGGTNWGWYAYDPKLNLFY YGSGNPAPWN  
 ETMRPGDNKWTMTI WGRDLDTGMAK WGYQKTPHDEWDFAGVNMVLTDPVNGKMTPLLSHIDRN  
 GILYTLNRENGNLIVAEKVDP AVNVFKKVDLKTGT PVRDPEFATRMDHKGTNICPSAMGFHNQGV  
 DSYDPESRTLYAGLNHICMDWEPFMLPYRAGQFFVGATLAMYPGPNGPTKKEMGQIRAFDLTTGK  
 AKWTKWEKFAAWGGTLYTKGGLVWYATLDGYL KALDNKD GKELWNFKMPSGGIGSPMTYSFKGKQ  
 YIGSMYGVGGWPGVGLVFDLTDPSAGL GAVGAFRELQNHTQMGGGLMVFSL

>1WSRA

AQEVLRRTPLYDFHLAHGGKMVAFAGW SLPVQYRDSHTD SHLHTRQHCSLFDVSHMLQTKILGSD  
 RVKLMESLVGDI AELRPNQGTLSLFTNEAGGILDDLI VTNNTSEGHLYVVS NAGCWEKDLALMQD  
 KVRELQNQGRDVGLEVL DNALLALQGP TAAQVLQAGVADDLRKLPFMTSAVMEVFGVSGCRVTRC

GYTGEDGVEISVPVAGAVHLATAILKNPEVKLAGLAARDSLRLEAGLCLYGNDIDEHTTPVEGSL  
 SWTLGKRRRAAMDFPGAKVIVPQLKGRVQRRRVGLMCEGAPMRAHSPILNMEGTKIGTVTSGCPS  
 PSLKKNVAMGYVPCYEYSRPGTMLLVEVRRKQOMAVVSKMPFVPTNYITLK

>1BCH1

AIEVKLANMEAEINTLKSLELTNKLHAFSMGKKS GKFFVTNHERMPFSKVKALCSELRGTVAI  
 PRNAEENKAIQEVAKTSAFLGITDEVTEGQFMYVTGGRLTYSNWKKDQPDDWYGHGLGGGEDCVH  
 IVDNGLWNDISQASHTAVCEFFPA

>1DXKA

SQKVEKTVIKNETGTISISQLNKNVWVHTELGSFNGEAVPSNGLVLNTSKGLVLVDSSWDDKLT  
 ELIEMVEKKFQKRVTDVIIITHAHADRIGGIKTLKERGIKAHSTALTAELAKKNGYEEPLGDLQTV  
 TNLKFGNMKVETFPYPGKGHTEDNIVVWLPQYNILVGGSLVKSTSADKDLGNVADAYVNEWSTSIEN  
 VLKRYRNINAVVPGHGEVGDKGLLLHTLDLLK

>3H8TA

DEPNQPSTPEAVTKTVTIDASKYETWQYFSSFSKGEVVNVTDYKNDLNWDMALHRYDVRINCGESG  
 KGKGGAVFSGKTEMDQATTVPPTDGYTVDVLGRITVKYEMGPDGHQMEYEEQGFSEVITGKKNAGG  
 FASGGWLEFSGHPAGPTYKLSKRFFVVRGADGNIAKVQFTDYQDAELKKGVITFTTYTPVK

>3M70A

MNGVAAAALLVWILTSPSSSDHSGSENGWPKHTACNSGGLEVYQSCDPLQDFGLSIDQCSKQIQSN  
 LNIRFGIILRQDIRKFLDITLMAKSSILNYSYPLCEEDQPKFSFCGRRKGEQIYYAGPVNNPG  
 LDVPQGEYQLLLELYNENRATVACANATVTSS

>3OYYA

MAMKTAQEFRAQVANINGAPWVIQKAEFNKSGRNAAVVKMKLKNLLTGAGTETVFKADDKLEP  
 IILDRKEVTYSYFADPLYVFMDSFNQYEIEKDDLEGVLTFIEDGMTDICEAVFYNDKVISVELP  
 TTIVRQIAYTEPAVRGDTSGKVMKTARLNNGAELQVSAFCEIGDSIEIDTRTGEYKSRVKA

>1FAZA

APADKPQVLASFTQTSASSQNAWLAANRNQSAWAAEFDWSTDLCQAPDNPFQFPFNTACARHD  
 FGYRNYKAAGSFDANKSRIDSAFYEDMKRVCTGYTGEKNTACNSTAWTYQAVKIFG

>1ODZA

MRADV KPVTVKLVDSQATMETRSLFAFMQEQRHSIMFGHQHETTQGLTITRTDGTQSDTFNAV  
 DFAAVYGWDTLSIVAPKAEGDIVAQVKKAYARGGIITVSSHFDNPKTDTQKGVWPVGTSDWQTPA  
 VVDSLPGGAYNPVLNGYLDQVAEWANNLKDEQGRLIPVIFRLYHENTGSWFWWGDKQSTPEQYKQ  
 LFRYSVEYLRDVKGVRNFLYAYSPNNFWDVTEANYLERYPGDEWVDVLGFDTYGPVADNADWFRN  
 VVANAALVARMAEARGKIPVISGIGIRAPDIEAGLYDNQWYRKLISGLKADPDAREIAFLLVWRN  
 APQGVPGPNGTQVPHYWVPANRPENINNGTLEDFAFYADEFTAFNRDIEQVYQRPTLIVK

>1PF3A

AERPTLPIDLLTTDARNRIQLTIGAGQSTFGGKTATTWGYNGNLLGPAVKLQRGKAVTVDIYNQ  
 LTEETTLHWHGLEVPGVDGGPQGIIPGGKRSVTLNVDQPAATCWFHPHQHGKTGRQVAMGLAG  
 LVVIEDDEILKLMLPKQWIGIDDPVIVQDKKFSADGQIDYQLDVMTAAVGFWDGDTLLTNGAIYPQ  
 HAAPRGWLRRLLLNGCNARSLNFATS DNRPLYVIASDGGLLPEPVKSELVLMGERFEVLVEVN  
 DNKPFDLVTLVPSQMGMAIAPFDKPHPVMRIQPIAISASGALPDTLSSLPALPSLEGLTVRKLQL  
 SMDPMLDMMGMQMLMEKYGDQAMAGMDHSQMMGHMGMHNMNMNHGGKDFDHHANKINGQAFDMN  
 KPMFAAAKQYERWVIVSGVGDMLLHPFHIHGTQFRILSENGKPPAAHRAGWKDTPKVEGNVSEVL  
 VKFNHDAPKEHAYMAHCHLLEHEDTGMMLGFTVSAWSPNF EK

>1UWLA

MTDNNNYRDVEIRAPRGNKLTAKSWLTEAPLRMLMNNLDPQVAENPKELVVYGGIGRAARNWECY  
 DKIVETLTRLEDDETLLVQSGKPVGVFKTHSNAPRVLIANSNLVPHWANWEHFNELDAKGLAMYG  
 QMTAGSWIYIGSQGIVQGTYETFFVEAGRQHYGGSLKGWVLTAGLGGMGAQPLAATLAGACSLN  
 IESQQSRIDFRLETRYVDEQATDLDDALVRIAKYTAEGKAI SIALHGNAAEILPELVKRGVRPDM  
 VTDQTSAHDPLNGYLPAGWTWEQYRDRAQTEPAAVVKAQKQSMVHVQAMLDQKQGVPTFDYGN  
 NIRQMAKEEGVANAFDFPGFVPAYIRPLFCRGGVGFPRWAALSGEAEDIYKTDKVKELIPDDAHL  
 HRWLDMARERISFQGLPARICWVGLGLRAKLGLAFNEMVRSGELSAPVVI GRDHLD SGVS S PNR  
 ETEAMRDGSDAVSDWPLL NALLNTAGGATWVSLHGGGVGMGFSQHSGMVIVCDGTDEAAER IAR  
 VLTNDPGTGVMRHADAGYDIAIDCAKEQGLDLP MITG

>3MCXA

GDWLDLNTTSSVETGQAI VTLDDAQIALNGIYRLASGHSY YGDNYWYYGDCRAADVQARITKGDG  
 KRVSPYYEYNVLASDNLNIVLPWNTVYKVIRQTNNLIQKIESGSIQSSDTKELNRIKSEALVMRG  
 LSLFNLTRLFGMPYTNDKGASLGVPIETSPSDPTHKPSRSTVAQCYEQVVS DMSNALSGLRQETS  
 NGYINYWAAQALLSRVYLNMG EYQKAYDAATDVIKNNGGRYQLYSYEEYPNVWGQDFQSESLFEL  
 YITLSEPSGGTGEGAPMVYANEATVDWNNLILSEDFLNLNEDPKDVRHCLTKESVIENNTGLP  
 AAAMHEKVYLAKFPKGTGDDPKTNNICIRLSEVYLNAAEAGLKKGTDIEEAQGYLNDIISRRTT  
 DTSQQVSTETFTLDRILKERRKELVGEGEVFDYLRNGLAIERKGSWHLET LKASNAQKIEATDL  
 RIALPI PQSEIDANPNIQQNPR

>1Z82A

MGSDKIH HHHHHMEMRFFVLGAGSWGTVFAQMLHENGEEVILWARRKEIVDLINVSHTSPYVEES  
 KITVRATNDLEEIKKEDILVIAIPVQYIREHLLRPLVKPSMVLNLSKGI EIKTGKRVSEIVEEIL  
 GCPYAVLSG PSHAEVAKKLPTAVTLAGENSKELQKRISTEYFRVYTCE DVVGV E IAGALKNVIA  
 IAAGILDGFGGWDNAKAALETRGIYEIARFGMFFGADQKTFMGLAGIGDLMVTCNSRYSRNRFRG  
 ELIARGFNPLKLLLESSNQVVEGAF TVKAVMKIAKENKIDMPISEEVYRVVYEGKPP LQSMRDLMR  
 RSLKDEFWAS

>3GZRA

GGEGTDAIQALI QAYFTA WNTNAPERFAE IFWPDGSWVNVVGMHWRGRDQIVFAHTAFLKTI FKD  
 CKQELVTIEARTIAPGSALAVVT LIQDAYVTPDGRQMPRAHDR LTL LAVEREGVWRF IHGHNTIV  
 NPDAANNDPVLRMKPA

>2A33A

MEIKGESMQSKFRRICVFCGSSQ GKSSYQDAAVDLGNELVSRNIDL VYGGSIGLMGLVSQAV  
 HDGGRHVIGIIPKTLMPREL TGETVGEVRAVADMHQKAE MAKHSDAFIALPGGYGTLEELLEVI  
 TWAQLGIHDKPVGLLNV DGYNSLLSFIDKAVEEGFISPTAREIIVSAPTAKELVKKLEEYAPCH  
 ERVATKLCWEMERIGYSSEE

>1DHIA

MISLIAALAVDRVIGMENAMPWNLPASLAWFKRNTLDKPVIMGRHTWESIGRPLPGRKNIILSSQ  
 PGTDDRVTVWKSVD EAIACGDVPEIMVIGGGRVYEQFLPKAQKLYLTHIDAEVEGDTHFPDYEP  
 DDWESVFSEFHDADAQNSHSYCFEILERR

>3A8GA

MSVTIDHTTENAAPAQAPVSDRAWALFRALDGKGLVPDGYVEGWKKTFEEDFS PRRGAE LVARAW  
 TDPEFRQ LLLTDGTA AVAQYGYLGPQGEYIVAVEDTPTLKNVIVCSLCACTAWPILGLPPTWYKS  
 FEYRARVVREPRKVLSEMGTEIASDIEIRVYDTTAETRYMVLPQRPAGTEGWSQEQLQEIVTKDC  
 LIGVAIPQVPTV

>1VDWA

MSVKTWRKIAIDIIRDFDHNIMPLFGNPKASETISISPSGDETKVVDKVAENIIISKFKDLGVNV  
 VSEEIGRIDQGSYTVVVVDPLDGSYNFINGIPFFAVSVAIFHEKDPIYAFIYEPIVERLYEGIPG  
 KGSYLNGEKIKVRELAEKPSISFYTKGKGTKIIDKVKRTRTLGAI ALELAYLARGALDAVVDIRN  
 YLRPTDIAAGVVIAREAGAIVKDLGKDV EITFSATEKVNIIAANNEELLELETILRSIEK

>2QKFA

MDIKINDITLGNNSPFVLFGGINVLES LDSTLQTC AHYVEVTRKLGIPYIFKASFDKANRSSIHS  
 YRGVGL E EGLKIFEKVKAEFGIPVITDVHEPHQCQPVAEVC DVIQLPAFLARQTDLVVAMAKTGN  
 VVNIKKPQFLSPSQMKNIVEKFHEAGNGK LILCERSSFGYDNLVVDMLGFGVMKQTCGNLPVIF  
 DVTHSLQTRDAGSAASGGRRQA LD LALAGMATRLAGLFLESHDPK LAKCDGPSALPLHLL EDF  
 LIRIKALDDLIKSQPILTIE

>2ZU1A

GPAFEFAVAMMKRNSSTVKTEYGEFTMLGIYDRWAVLPRHAKPGPTILMNDQEVGVLD AKELVDK  
 DGTNLEL TLLKLNREKFRDIRGFLAKEEVEVNEAVLAIN TSKFPNMYIPVGQVTEYGFNLGGT  
 PTKRMLMYNFPTRAGQAGGVL MSTGKVLGIHVGGNGHQGFS AALLKH YFNDEQ

>2GJPA

HHMGTNGTMMQYFEWHL PNDGQHWNR LRDDASNLNRNGITAIWI PPAWKGTSQNDVGYGAYDLYD  
 LGEFNQKGTVRTKYGTRSQLES AIHALKNNGVQVYGDVVMNHKGGADATENVLAVEVNPNNRNQE  
 ISGDY TIEAWTKFDFPGRGNTYSDFKWRWYHFDGVDWDQSRQFQNR IYKFRGDGKAWDWEVDSEN  
 GNYDYLMYADVDMDHPEVVNELRRWGEWY TNLNL DGFRI DAVKHIKYSFTRDWLTHVRNATGKE  
 MFVAEAEFWKNDLGALENYLNKTNWNH SVFDVPLHYNLYNASNSGGNYDMAKLLNGTVVQKHPMHA  
 VTFVDNHDSQPGESLESFVQEWFKPLAYAL I LTREQGYPSVFGDY YGIPTHSVPAMKAKIDPIL  
 EARQNFAYGTQHDYFDHNNI IGWTREGNTTHPNSGLATIMSDGPGGEKWMYVGVQNKAGQVWHDIT  
 GNKPGTVTINADGWANFSVNGG SVSIWVKR

>3B5NC

GSIKFTKQSSVASTRNTL KMAQDAERAGMNTLGMLGHQSEQLNNVEGNLDLMKVQNKVADEKVAE  
 LKKLQ

>1HQGA

MSSKPKPIEII GAFPSKGQPRGGVEKGPAA LRKAGLVEK LKET EYNVRDHGDLAFVDPNDSPFQ  
 IVKNPRSVGKANEQLAAVVAETQKNGTISVVLGGDHSMAIGSISGHARVHPDLCVIWVDAHTDIN  
 TPLTTSSGNLCGQPVAFL LKELK GKFPDVPGF SVWTPCISAKDIVYIGLRD VDPGEHYI IKT LGI  
 KYFSMTEVDKLGIGKVM EETFSYLLGRKKRPIHLSFDVDGLDPVFTPATGTPVVGGLSYREGLYI  
 TEEIYKTGLLSGLDIMEVNPTLGKTPEEVTRTVNTAVAL TLSCFGTKREGNHK PETDY LKPPK

>2OQYA

MKITDLELHAVGIPRHTGFVNKHVIVKIHTDEGLTGIGEMSDFSHLPLYSVDLHDLKQGLLSILL  
 GQNPFDLMKINKELTDNFPETMYYYEKGSFIRNGIDNALHDLCAKYLDISVSDFLGGRVKEKIKV  
 CYPIFRHRFSEEVESNLDVVRQKLEQGFDFRLYVGKNLDADEEFLSRVKEEFGSRVRIKSYDFS  
 HLLNWKDAHRAIKRLTKYDLGLEMIESPAPRNDFDGLYQLRLKTDYPISEHVWSFKQQQEMIKKD  
 AIDIFNISPVFIGGLTSAKKAAAYAAEVASKDVVLGTTQELSVGTAAMAHLGC SLTNINHTSDPTG  
 PELYVGDVVKNRVTYKDG YLYAPDRSVKGLGIELDESLLAKYQVPDLSWDNVTVHQLQDR TADTK  
 S

>2OQAA

DVSFSLSGSSSTSYSKFIGALRKALPSNGTVY NITLLSSASGASRYTLMKLSNYDGKAITVAID  
 VTNVYIMGYLVNSTSYFFNESDAKLASQYVFAGSTIVTLPYSGNYEKLQTAAGKIREKIPLGFPA  
 LDSAITTLFHYDSTAAAAAFLV I IQTTAESSRFKYIEGQIIMRISKNGVPSLATISLENEWSALS

KQIQLAQTNNGTFKTPVVIMDAGGQRVEIGNVGSKVVTKNIQLLLN

>3QD5A

PGPSMAATPLPPLRLAIACDDAGVSYKEALKAHLSNPLVSSITDVGVTSTTDKTAYPHVAIQAA  
QLIKDGVDRALMICGTGLGVAISANKVPGIRAVTAHDTFSVERAILSNDQVLCFGQRVIGIEL  
AKRLAGEWLTYRFDQKSASAQKVQAI SDYEKKFVEVN

>3D1RA

GMRRELAIEFSRVTESAALAGYKWLGRGDKNTADGAAVNAMRIMLNQVNI DGTIVIGEGEIAEAP  
MLYIGEKVGTGRGDAVDIAVDPIEGTRMTAMGQANALAVLAVGDKGCFLNAPDMEKLVGPGA  
KGTIDLNLPLADNLRNVAAALGKPLSELVTITLAKPRHDAVIAEMQQLGVRVFAIPDGDVAASIL  
TCMPDSEVDVLYGIGGAPEGVVSAAVIRALDGMNGRLLARHDVKGDNEENRRIGEQLARCKAM  
GIEAGKVLRLGDMARSDNVIFSATGITKGDLLLEGISRKGNIA TTETLLIRGKSRTIRRIQSIHYL  
DRKDPQM V HIL

>1RWIB

RPSWSPTQASGQTVLPFTGIDFRLSPSGVAVDSAGNVYVTSEGMYGRVVKLATGSTGTTVLPFNG  
LYQPQGLAVDAGTIVYVTD FNNRVVTLAAGSNNQTVLPFDGLNYPEGLAVDTQGAVYVADRGNR  
VVKLAAGSKTQTVLPFTGLNDPDGVAVDNSGNVYVTD TDNNRVVKLEAESNNQVLPFTDITAPW  
GIAVDEAGTVYVTEHNTNQVVKLLAGSTTSTVLPFTGLNTPLAVAVDSDRTVYVADRGNDRVVKL  
TSLEHHHHHH

>3NXDC

GSHMGVEVLEVKTVGDSITEVECFLTPEMGDPDEHLRGFSSISISDTFESDSPNRDMLPCYSV  
ARIPLPNLNEDLTCGNILMWEAVTLKTEVIGVTSLMNVHSNGQATHDNGAGKPVQGTSFHFSSVG  
GEALELQGVLFNYRTKYPDGTIFPKNATVQSQVMNTEHKAYLDKNKAYPVECWWPDPTRNENTRY  
FGTLTGGENVPPVLHITNTATTVLLDEFVGVPLCKGDNLYLSAVDVCGMFTNRSQSQQWRGLSRY  
FKVQLRKRVRKN

>1TEJB

NSVNPCCDPQTCKPIEGKHCISGPCCENCYFLRSGTICQRARGDGNNDYCTGITPDCPRNRYNV

>3EWDA

MNIIQEPIDFLKKEELKNIDLSQMSKKERYKIWKRI PKCELHCHLDLFCFSADFFVSCIRKYNLQP  
NLSDEEVL DY YLFAKGGKSLGEFVEKAIKVADI FHDYEVIEDLAKHAVFNKYKEGVVLM EFRYSP  
TFVAFKYNLDIELIHQAI V KGIKEVVELLDHKIHVALMCIGTGHEANIKASADFLKHKAD FVG  
FDHGGHEVDLKEYKEIFDYVRESGVPLSVHAGEDVTLPNLNTLYSAIQVLKVERIGHGIRVAESQ  
ELIDMVKEKNILLEVCPI SNVLLKNAKSM DTHPIRQLYDAGVKVSVNSDDPGMFLTNINDDYEEL  
YTHLNF TLED FMMKNEWALEKSFMD SNIKDKIKNLYFKGEFEAYV

>1EW4A

MNDSEFHRLADQLWLTIEERLDDWDGSDIDCEINGGVLTITFENGSKII INRQEPLHQVWLATK  
QGGYHFDLKGDEWICDRSGETFWDLLEQAATQQAGETV SFR

>1H6WA

LSYPNATESVYGLTRYSTNDEA IAGVNNESSITPAKFTVALNNVFETR VSTESSNGVIKISSLPQ  
ALAGADDTTAMT PLKTQQLAVKLI AQIAPSKNAATESEQGVIQLATVAQARQGT LREGY AISP Y T  
FMNSTATEEYKGVIKLGTQSEVNSNNASVAVTGATLNGRGSTTSMRGVVKLTTTAGS QSGGDASS  
ALAWNADV IHQRGGQTINGTLR INNTLTIASGGANITGTVNMTGGYIQGKR VVTQNEIDRTIPVG  
AIMMWAADSLPSDAWR FCHGGTVSASDCPLYASRIGTRYGGSSSNPGLPDMR

>2CB9A

MARSQLSAAGEQHVIQLNQGGK N LFCFPPI SGFGIYFKDLALQLNHKAAVYGFHFIEEDSRIEQ

YVSRI TEIQPEGPYVLLGYSAGGNLAFEVVQAMEQKGLEVSDFIIVDAYKKDQSI TADTENDDSA  
 AYLPEAVRETVMQKKRCYQEYWAQLINEGRIKSNIHFIEAGIQTETSGAMVLQKWQDAAEEGYAE  
 YTGYGAKHDMLEGEFAEKNANIILNILDKINSDQKVLPNKHGSHHHHHH

>1GXJA

EKEMIERDMREYRGFSRAVRAVFEKERFPGLVDVVSNLIEVDEKYSLAVSVLLGGTAQNIIVRN  
 VDTAKAIVEFLKQNEAGRVTILPLDLIDGSFNRI SLENERGFVGYAVDLVKFSPDLEVLGGFLF  
 GNSVVVETLDDAIRMKKKYRLNTRIATLDGELISGRGAI TGGREERS SNVFERRIK

>1VLCA

MGSDKIHSHHHHMKIAVLPDGDGIGPEVVREALKVLEVVEKKTGKTFEKVFGHIGGDAIDRFGEPL  
 PEETKKICLEADAI FLGSVGGPKWDDLPEKRPEIGLLALRKMLNLYANIRPIKVYRSLVHVSP  
 LKEKVIGSGVDLVTVRELSYGVYQGPRGLDEEKGFDTMIYDRKTVERIARTAFEIAKNRRKKVT  
 SVDKANVLYSSMLWRKVVNEVAREYPDVELTHIYVDNAAMQLILKPSQFDVILTNNMFGDILSDE  
 SAALPGSLGLLPSASFQDNLYEPAGGSAPDIAGKNIANPIAQILSLAMMLEHSFGMVEEARKIE  
 RAVELVIEEGYRTRDIAEDPEKAVSTSQMGDLICKKLEEIW

>2VLBA

GQMQQASTPTIGMIVPPAAGLVPADGARLYPDLFFIASGLGLGSVTPEGYDAVIESVVDHARRLO  
 KQGAADVSLMGTSLSFYRGAAFNAALTVAMREATGLPCTTMSTAVLNGLRALGVRVALATAYID  
 DVNERLAAFLAEESLVPTGCRSLGITGVEAMARVDTATLVDL CVRAFEAAPSDGILLSCGGLLT  
 LDAIPEVERRLGVPVSSSPAGFWDVRLAGGGAKARPGYGRLFDES GSGSHHHHHH

>2VLPB

MESKRKPKGATGKGPVGDKWLD DAGKDSGAPI PDRIADKLRDKEFKSFDDFAKAVWEEVSKDP  
 ELSKNLNPSNKSSVSKGYS PFTPKNQVGGGRKVYELHHDKPI SQGGEVYDMDNIRVTPKRHIDI  
 HRGK

>2Y88A

MPLILLPAVNVEGRAVRLVQKGAGSQTEYGS AVDAALGWQRDGAEWIHLVDLDAAFGRGSNHEL  
 LAEVVVKLDVQVELSGGIRDDESLAAALATGCARVNVGTAALENPQWCARVIGEHGDQVAVGLDV  
 QIIDGEHRLRGRGWETDGGDLWDVLERLDSEGC SRFVVTDITKDGT LGGPNLDDL LAGVADRTDAP  
 VIASGGVSSLDDLRAIATLTHRGVEGAI V GKALYARRFTLPQALAAVRD

>3DV9A

SNAMFKEAINNYLH THGYESIDLKAVLFDMDGVLFD SMPNHAESWHKIMKRFGFGLSREEAYMHE  
 GRTGASTINIVSRRERGHDATEEEIKAIYQAKTEEFNKCPKAERMPGALEVLTKIKSEGLTPMVV  
 TGSGQTSLLDRLNHNFPGIFQANLMVTAFDVKY GKNPEPYLMALKKGGFKPNEALVIENAPLGV  
 QAGVAAGIFTI AVNTGPLHDNVLLNEGANLLFHSMPDFNKNWETLQSALKQD

>2QRJA

MGHHHHHHHHHSSGHIEGRHMAAVTLHLRAETKPLEARAALTPTTVKKLIAKGFKIYVEDSPQS  
 TFNINEYRQAGAIIVPAGSWKTAPRDRII IGLKEMPETDTFPLVHEHIQFAHCYKDQAGWQNVLM  
 RFIKGGHTLYDLEFLENDQGRRVAAFGFYAGFAGAALGVRD WAFKQTHSDDDELPAVSPYPNEKA  
 LVKDVTKDYKEALATGARKPTVLIIGALGRCGSGAIDLLHKVGI PDANILKWDIKETS RGGPFDE  
 IPQADIFINCIYLSKPIAPFTNMEKLNPNRRLRTVV DVSADTTNPHNPIPIYTVATVFNKPTVL  
 VPTTAGPKLSVISIDHLP SLLPREASEFFSHDLLPSLELLPQRKTAPVWVRAKKLFD RH CARVKR  
 SSRL

>206XA

NDDLWHQWKRMYNKEYNGADDQHRRIWEKNVKHIEHNLRHDLGLV TYTLGLNQFTDMTFEEFK  
 AKYLTEM SRASDILSHGVPYEANNRAVPDKIDWRESGYVTEVKDQGNCGSGWAFSTTG TMEGQYM



KNERTSISFSEQQLVDCSRPWGNNCGGGLMENAYQYLKQFGLETSSYPYTAVEGQCRYNKQLG  
 VAKVTGFYTVHSGSEVELKKNLVGAEGPAAVAVDVESDFMMYRSGIYQSQTCSPLRVNHAVLAVGY  
 GTQGGTDYWIVKNSWGLSWGGERGYIRMVNRNGNMCGIASLASLPMVARFP

>1GQGA

DTSSLIVEDAPDHVRPYVIRHYSHARAVTVDTQLYRFYVTGPSSGYAFTLMGTNAPHSDALGVLP  
 HIHQKHENFYCNKGSFQLWAQSGNETQQTRVLSSGDYGSVPRNVTHTFQIQDPDTEMGTGVIIVPG  
 GFEDLFYYLGTNATDTHHTPYIPSSSDSSSTTGPDSSTISTLQSFVYAELSFTPRDTVNGTAP  
 ANTVWHTGANALASTAGDPYFIANGWGPKYLNQYGYQIVAPFVTATQAQDTNYTLSTISMSTTP  
 STVTVPTWSFPGACAFVQVEGRVVVQIGDYAATELGSQDVAFIPGGVEFKYYSEAYFSKVLVSS  
 GSDGLDQNLVNGGEEWSSVSFPADW

>3MSUA

SNAMEVMLMSKYATLKYADKNIEIELPVYSPSLGNDCIDVSSLVKHGIIFTYDPGFMSTAACESKI  
 TYIDGGKGVLLHRGYPIEEWTQKSNYRTLALYALYIYELPTDEQVKSFRQEIINKMPVCEHVKA  
 AAMPQHTHPMSSLIAGVNVLAAEHIHNGQKESQDEVAKNIVAKIATIAAMAYRHNHGKFFLEPKM  
 EYGYAENFLYMMFADDESYPDELHIKAMDTIFMLHADHEQNASTSTVRLSGSTGNSPYAAI IAG  
 ITALWGPAGGANEAVLKMMLSEIGSTENIDKYIAKAKDKDDPRLMGFGHRVYKNTDPRATAMKK  
 NCEEILAKLGHSDNPLLTVAKKLEEIALQDEFFIERKLFNSVDFYSGIILKAMGIPEDMFTAIFA  
 LARTSGWISQWIEMVNDPAQKIGRPRQLYTGATNRNF

>1KTBA

LENGLARTPPMGWLAWERFRCNVNCREDPQCISEMLFMEMADRIAEDGWRELGYKYINIDDCWA  
 AKQRDAEGRVLPDPERFRGKALADYVHARGLKLG IYGD LGRLTCGGYPGTTLDRVEQDAQTFA  
 EWGVDMLKLDGCYSSGKEQAQGYPQMARALNATGRPIVYSCSWPAYQGGLPKVNYYTLLEICNL  
 WRNYDDIQDSWDSVLSIVDWFFTNQDVLQPFAGPGHWNDPDMLIIGNFGLSYEQSRSQMALWTIM  
 AAPLLMSTDLRTISPSAKKILQNRMIQINQDPLGIQGRRIIKEGSHIEVFLRPLSQAASALVFF  
 SRRTDMPFRYTTSLAKLGFPMGAAEYVQDVYSGKIISGLKTGDNFTVIINPSGVVMWYLCPKALL  
 IQQQAPGGPSRLPLL

>2WGVA

MGSITENTSWNKEFSAEAVNGVFLCKSSSKSCATNDLARASKEYLPASTFKIPNAIIGLETGVI  
 KNEHQVFKWDGKPRAMKQWERDLTLRGAIQVSATPVFQQIAREVGEVRMQKYLKFFSYGNQNI  
 SGIDKFWLEGQLRISAVNQVEFLESYLNKLSASKENQLIVKEALVTEAAPEYLVHSKTGFSVGT  
 ESNPGVAWVWGVEKETEVYFFAFNMDIDNESKLPKRKSIPTKIMESEGIIGG

>3GBXA

SNAMLKREMNIADYDAELWQAMEQEKVRQEEHIELIASENYTSPRVMQAQGSQLTNKYAEGYPGK  
 RYYGGCEYVDVVEQLAIDRAKELFGADYANVQPHSGSQANFAVYTALLQPGDVLGMNLAQGGHL  
 THGSPVNFSGKLYNIVPYGIDESGKIDYDEMAKLAKEHKPKMIIGGFSAYSGVVDWAKMREIADS  
 IGAYLFVDMAHVAGLIAAGVYPNPVPHAVVTTTTHTKTLAGPRGGLILAKGGDEELYKKLNSAVF  
 PSAQGGPLMHVIAGKAVALKEAMEPEFKVYQQQVAKNAKAMVEVFLNRGYKVVSGGTENHLFLLD  
 LVDKNLTKEDAALGRANITVNKNSVPNDPKSPFVTSGIRIGSPAVTRRGFKEAEVKELAGWMC  
 DVLNINDEATIERYKAKVLDICARFPVYA

>1E6WA

AAAVRSVKGLVAVITGGASGLGLSTAKRLVGQATAVLLDVPNSEGETEAKKLGNCIFAPANVT  
 SEKEVQAALTLAKEKFRIDVAVNCAGIAVAIKTYHEKKNQVHTLEDFQRVINVNLIQTFNVIRL  
 VAGVMGQNEPDQGGQRGVIINTASVAAFEGQVQAAYSASKGGIVGMTLPIARDLAPIGIRVVTI  
 APGLFATPLLTTLDPKVRNFLASQVFPFSPRLGDPAEYAHLVQMVIENPFLNGEVIRLDGAIRMQP

>1E6FA

MKSNEHDDCQVTNPSTGHLFDLSSLSGRAGFTAAYSEKGLVYMSICGENENCPPGVGACFGQTRI  
SVGKANKRLRYVDQVLQVLVYKDGSPCPSKSGLSYKSVISFVCRPEAGPTNRPMLISLDKQCTCTLF  
FSWHTPLACEQAT

>3A75B

TTHFTVADRWGNVVSYTTTIEQLFGTGIMVPDYGVILNNELTDFDAIPGGANEVQPNKRPLSSMT  
PTILFKDDKPVLTVGSPGGATI ISSVLQTI LYHIEYGMELKAAVEEPRIYTNSSSYRYEDGVPK  
DVL SKLNGMGHKFGTSPVDIGNVQSSISIDHENGTFKGVADSSRNGAAIGINLKRK

>3FIRA

MKKIITLFGACALAFSMANADVNLGPGGPHALTKDIANKYSEKTGVKVNPNFVGPQATWFEKAKK  
DADILFGASDQSALAIASDFGKDFNVSKIKPLYFREAII LTQKGNPLKIKGLKDLANKKVRIVVP  
EGAGESNTSGTGVWEDMIGRTQDIKTIQNFRRNIVAFV PNSGSARKLFAQDQADAWITWIDWSKS  
NPDIGTAVAIEKDLVVYRTFNVI AKEGASKETQDFIAYLSSKEAKEIFKKYGWREH

>2IAPA

IPVIEPLFTKVTEDIPGAQGPVFDKNGDFYIVAPEVEVNGKPAGEILRIDLKTGKKTVICKEPVN  
GYGGIPAGCQC DRDANQLFVADMRLGLLVVQTDGT FEEIAKKDSEGRMQGCNDCAF DYEGLWI  
TAPAGEVAPADYTRSMQEKFGSIYCF TTDGQMIQVDTAFQFPNGI AVRHMNDGRPYQLIVAETPT  
KKLWSYDIKGPAKIENKKVWGHIPGTHEGGADGMDFDEDNLLVANWGS SHIEVFGPDGGQPKMR  
IRCPFEKPSNLHFKPQTKTIFVTEHENNAVWKFEWQRNGKKQYCETLKF G I F

>1Q74A

MSETPRLLFVHAHPDDESLSNGATIAHYTSRGAQVHVVTCTLGEEGEVIGDRWAQLTADHADQLG  
GYRIGELTAALRALGVSAPIYLGAGRWRDSGMAGTDQRSQRRFVDADPRQTVGALVAI IRELRP  
HVVVYTDPNGGYGHPDHVHTHTVTAAVAAAGVSGTADHPGDPWTVPKFYWTVLGLSALISGAR  
ALVPDDL RPEWVLPRADEIAFGYSDDGIDAVVEADEQARA AKVAALAAHATQVVVGPTGRAAALS  
NNLALPILADEHYVLAGGSAGARDERGWETDLLAGLGFTASGT

>2CWLA

MFLRIDRLQIELPMPKEQDPNAAA VQALLGGRFGEMSTLMNYMQSFNFRGKKALKPYDLIAN  
IATEELGHIELVAATINSL LAKNPGKDLEEGVDPE SAPLGF AKDVRNAAHFIAGGANS LVMGAMG  
EHWNGEYVFTSGNLI LDLLHNFFLEVAARTHKL RVYEMTDN PVAREMIGYLLVRGGVHAAAYGKA  
LES LTGVEMTKMLPIPKIDNSKIPEAKKYMDLGFHRNLYRFS PEDYRDLGLIWKGAS PEDGTEVV  
VVDGPPTGGPVFDAGHDAAEFAP EFHPGELYEIAKKLYEKAK

>3NK6A

SEFMTEPAIITNASDPAVQRIIDVTKHSRASIKTTLIEDTEPLMECIRAGVQFIEVYGSSGTPLD  
PALLDLCRQREIPVRLIDVSI VNLQLFKAERKAKVFGIARVPRPARLADIAERGGDVVVL DGVKIV  
GNIGAIVRTSLALGAAGIVLVDSDLATIADRLLRASRGYVFSLPVVLADREEAVSFLRDN DIAL  
MVLDTDGD LGVKDLGDRADRMALVFGSEKGGPSGLFQEASAGTVSIPMLSSTESLNVS VSVGIAL  
HERSARNFAVRRAAAQA

>1V3IA

ATSDSNMLLNYPVYVMLPLGVVNDNVFEDPDGLKEQLLQLRAAGVDGVMVDVWWGI IELKGPK  
QYDWRAYRSLQLVQECGLTLQA IMSF HQCGNVGDIVNIPI PQWVL DIGESNHDI FYTNRSGTR  
NKEYLTVGVDNEPIFHGRTAIEIYSDYMKSFRENMSDFLESGLIIDIEVGLGPAGELRYPSYPQS  
QGWEFPGIGEFQCYDKYLKADFKA AVARAGHP EWELPDDAGKYNDVPESTGFFKSNGTYVTEK GK  
FFLTWYSNKLLNHGDQILDEANKAFLGCKVKLAIKVSGIHWYKVENHAAELTAGYYNLNDRDGY  
RPIARMLSRHHAILNFTCLEMRDSEQPSDAKSGPQELVQQVLSGGWREDIRVAGQNALPRYDATA

YNQIILNARPQGVNNNGPPKLSMFGVTYLRLSDDLQKSNFNIFKKFVLKMHADQDYCANPQKYN  
HAITPLKPSAPKIEVLLLEATKPTLPFPWLPETDMKVDG

>2W87A

ALLLQEAQAGFCRVDGTIDNNHTGFTGSGFANTNNAQGAAVWVAIDATSSGRRTLTI RYANGGTA  
NRNGSLVINGGSNGYTVSLPTTGAWTTWQTATIDVDLVQGNIVQLSATTAEGLPNIDSLSVVG  
GTVRAGNCG

>2W8TA

TEAAAQPHALPADAPDIAPERDLLSKFDGLIAERQKLLDSGVTDPFAIVMEQVKSPTAVIRGKD  
TILLGTYNYMGMTFDPDVIAAGKEALEKFGSGTCGSRMLNGTFHDMHMEVEQALRDFYGTGAI V F  
STGYMANLGIISTLAGKGEYVILDADSHASIYDGCQQGNAEIVRFRHNSVEDLDKRLGRLPKEPA  
KLVVLEGVYSMLGDIAPLKEMVAVAKKHGAMVLVDEAHSMGFFGPNGRGVYEAQGLEGQIDFVVG  
TFSKSVGTVGGFVVSNHPKFEAVRLACRPYIFTASLPSPVATATTSIRKLMTAHEKRERLWSNA  
RALHGGLKAMGFRGTETCDSAIVAVMLEDQEQAAAMWQALLDGGGLYVNMARPPATPAGTFLLR C  
SICAEHTPAQIQTVLGMFQAAGRAVGVIGLEHHHHHH

>1Y0BA

SNAMEALKRKIEEEGVVLSDQVLKVDSFLNHQIDPLLMQRIGDEFASRFAKDGITKIVTIESSGI  
APAVMTGLKLGVPVVFARKHKSLLTLDNLLTASVYSFTKQTESQIAVSGTHLSDDQDHVLIIDDFL  
ANGQAAHGLVSIVKQAGASIAIGIGIVIEKSFQPRDELVKLGYRVESLARIQSLEEGKVSFVQEV  
HS

>3K3KA

MGSSHHHHHHSSGLVPRGSHMPSELTPPEERSELKNSIAEFHTYQLDPGSCSSLHAQRIHAPPELV  
WSIVRRFDKPKQTYKHFIKSCSVEQNFEMRVGCTRDVIVISGLPANTSTERLDILDDERRVTGFSI  
IGGEHRLTNYKSVTTVHRFEKENRIWTVVLESYVDMPEGNSEDDTRMFADTVVKNLQKLATVA  
EAMARNSGDGSGSQVT

>3LIDA

MEKYQALLANNVENTAKEALHQLAYTGREYNNIQDQIETISDLLGHSQSLYDYLREPSKANLTIL  
ENMWSSVARNQKLYKQIRFLDTSGTEKVRIKYDFKTSIAGPSLILRDKSAREYFKYAQSLDNEQI  
SAWGIELERDKGELVYPLSPSLRILMPISVNDVRQGYLVLNVDIEYLSLLNYSVPRDFHIELVK  
HKGFIYASPDERSLYGDIIPERSQFNFSNMPDIWPRVVSEQAGYSYSGEHLIAFSSIKFVSNEP  
LHLIIDLSNEQLSKRATRINDLIQESLEHHHHHH

>1PGTA

MPPYTVVYFPVRGRCAALRMLLADQGSWKEEVVTVETWQEGSLKASCLYGQLPKFQDGLTLYQ  
SNTILRHLGRTLGLYGKDQQAALVDMVNDGVEDLRCKYVSLIYTNYEAGKDDYVKALPGQLKPF  
ETLLSQNQGGKTFIVGDQISFADYNLLDLLLLIHEVLAPGCLDAFPLLSAYVGRLSARPCLKAFLA  
SPEYVNLPIINGNKQ

>1ZLHB

NECVSKGFGCLPQSDCPQEARLSYGGCSTVCCDLSKLTGCKGKGECNPLDRQCKELQAESASCG  
KGQKCCVWLH

>3CIFA

MGSSHHHHHHSSGLVPRGSHMTATLGINGFGRIGRLVLRACMERNDITVVAINDPFMDVEY MAYL  
LKYSVHGNFNGTVEVSGKDLCCINGKVVVQAKDPAEIPWGASGAQIVCESTGVFTTEEKASLH  
LKGGAKKVII SAPPKDNVPMYVMGVNNT EYDPSKFENVISNASSTTNCLAPLAKIINDKFGIVEGL  
MTTVHSLTANQLTVDGSPSKGGKDW RAGRCAGNNIIPASTGAAKAVGKVIPALNGKLTGM AIRVPT  
PDVSVVDLTCKLAKPASIEEIQAVKEASNGPMKGIMGYTSDDVVSTDFIGCKYSSILDKNACIA

LNDSFVKLISWYDNESEGYSNRLVDLAVYVASRGL

>2JINA

SMRVDYLVTEEEINLTRGPSGLGFNIVGGTDQQYVSNDSGIYVSRIKENGAAALDGRLOEGDKIL  
SVNGQDLKNLLHQDAVDLFRNAGYAVSLRVQHRESSI

>2RK6A

GSHMASKRALVILAKGAEEMETVIPVDVMRRAGIKVTVAGLAGKDPVQCSRVDVICPDASLEDAK  
KEGPDYDVVLPGGNLSAQNLSAASAAVKEILKEQENRKGLIAAICAGPTALLAHEIGFGSKVTTHP  
LAKDKMMNGGHYTYSENVEKDGLILTSRGPPTSFKFALAVEALNGKEVAAQVKAPLVVKD

>2GAIA

MAKKVKKYIVVESPAKAKTIKSI LGNEYEVFASMGHIIDLPKSKFGVDLEKDFEPEFAVIKKEK  
VVEKLDLAKKGELLIASDMDREGEIAWHIARVTNTLGRKNRIVFSEITPRVIREAVKNPREID  
MKKVRAQLARRILDRIVGYSLSPLWRNFKSNLSAGRVQSATLKLVCDREREILRFVPKKYHRIT  
VNFDTLTAEIDVKEKFFDAETLKEIQSIDELVVEEKKVSVKGFAPPEPFTSTLQQEAYS KLG  
SVSKTMMIAQQLYEGVETKDGHIAFITYMRTDSTRVSDYAKEEARNLITEVFGEYVSGKRERRK  
SNAKIQDAHEAIRPTNVFMTPEEAGKYLNSDQKKLYELIWKRFSLASQMKPSQYEETRFVLRKDG  
KYRFKGTVLKKIFDGYEKVWKTERNTGEFPFEEGESVKPVVVKIEEQETKPKPRYTEGSLVKEME  
RLGIGRPSTYASTIKLLLNRGYIKKIRGYLYPTIVGSVMDYLEKKYSDVVSVSFTAEMEKDLDE  
VEQGKKTDKIVLREFYESFSSVFDNRNDRIVVDFPTNQKCSGKEMRLSFGKYGFYKCECGKTRS  
VKNDEIAVIDDGKIFLGRKDSSESGSPDGRSVEGKGNLSEKRRKGGKGS

>2GAKA

PEFFSVRHLELAGDDPYSNVNCTKILQGDPEEIQVKLEILTVQFKKRPRWTPHDYINMTRDCAS  
FIRTRKYIVEPLTKEEVGFPIAYSIVVHHKIEMLDRLLRAIYMPQNFYCIHVDRKAEESFLAAVQ  
GIASCFDNVVASQLESVVYASWTRVKADLNCMKDLYRMNANWKYLINLCGMDFPIKTNLEIVRK  
LKCSTGENNLETEKMPNKEERWKKRYAVVDGKLTNTGIVKAPPPLKTPLFSGSAYFVVTREYVG  
YVLENENIQKLMWAQDQTYSPDEFWATIQRIPVPGSFPSSNKYDLSDMNAIARFVKWQYFEGD  
VSNGAPYPPCSGVHVRVSVVFGAGDLSWMLRQHHLFANKFDMDVDPFAIQCLDEHLRRKALENLE  
H

>2RLCA

CTGLALETKDGLHLFGRNMDIEYSFNQSIIFIPRNFKCVNKSNNKELTTKYAVLGMGTIFDDYPT  
FADGMNEKGLGCAGLNFVYVSYSKEDIEGKTNIPVYNFLLWVLANFSSVEEVKEALKNANIVDI  
PISENIPNTTLHWMISDITGKSIVVEQTKEKLNVDNNGVLTNSPTFDWHVANLNQYVGLRYNQ  
VPEFKLGDQSLTALGQGTGLVGLPGDFTPASRFIRVAFLRDAMIKNKDSIDLIEFFHILNNVAM  
VRGSTRTVEEKSDLTQYTSCMCLEKGIYYNTYENNQINAI DMNKENLDGNEIKTYKYNK'TLSIN  
HVN

>3DR3A

SNAMLNTLIVGASGYAGAEELVTVYVNRHPHMNITALTVSAQSNDAGKLISDLHPQLKGIVELPLQP  
MSDISEFSPGVDVFLATAHEVSHDLAPQFLEAGCVVFDLSGAFRVNDATFYEKYYGFTHQYPEL  
LEQAAAYGLAEWCGNKLKEANLIAVPGCYPTAAQLALKPLIDADLLDLNQWPVINATSGVSGAGRK  
AAISNSFCEVSLQPYGVFTHRHQPEIATHLGADVIFTPHLGNFPRGILETITCRLKSGVTQAQVA  
QALQQAYAHKPLVRLYDKGVPALKNVVGLPFCDIGFAVQGEHLIIVATEDNLLKGAAAQAVQCAN  
IRFGYAETQSLI

>2CN3A

ISSQAVTSPYKWDNVVIGGGGGFMPGIVFNETEKDLIYARAAIGGAYRWDPTETWIPLLDHFQ  
MDEYSYGVESIATDPVDPNRVYIVAGMYTNDWLPNMGAILRSTDRGETWEKTILPFKMGGNMPG

RSMGERLAIDPNDNRILYLGTRCGNGLWRSTDYGVTSKVESFPNPGTYIYDPNFDYTKDIIGVV  
WVVFDKSSSTPGNPTKTIYVGVADKNESIYRSTDGGVTWKAVPGQPKGLLPHHGVLASNGMLYIT  
YGDTCGPYDNGKQVWKFNTRTGEWIDITPIPYSSSDNRFCFAGLAVDRQNPDIIMVTSMNAWW  
PDEYIFRSTDGGATWKNIEWEGMYPERILHYEIDISAAPWLDWGTEKQLPEINPKLGWMIGDIEI  
DPFNSTRMMYVTGATIYGCDNLTDWDRGGKVKIEVKATGIEECAVLDLVSPPEGAPLVSavgdlv  
GFVHDDLKVGPKMHVPSYSSGTGIDYAELVPMFALVAKADLYDVKKISFSYDGGRNWFQPPNE  
APNSVGGGSVAVAADAKSVIWTPENASPAVTTDNGNSWKVCTNLGMGAVVASDRVNGKKFYAFYN  
GKFYISTDGLTFTDTKAPQLPKSVNKIKAVPGKEGHVWLAAREGGLWRSTDGGYTFEKLNSVDT  
AHVVGFGKAAPGQDYMAIYITGKIDNVLGFFRSDDAGKTWVRINDDEHGYGAVDTAITGDPRVYG  
RVYIATNGRGIVYGEPASDEPV

>1XA3A

MHHHHHGGSTSLYKKAGSETLYIQGDHLPMPKFGPLAGLRVVFSGIEIAGPFAGQMFAEWGAEVI  
WIENVAWADTIRVQPNYPQLSRRNLHALSLNIFKDEGREAFLLKLMETTDIFIEASKGPAFARRGI  
TDEVLWQHNPCLVIAHLSGFGQYGTEEYTNLPAYNTIAQAFSGYLIQNGDVDQMPAPFPYTADYF  
SGLTATTAALAALHKVRETGKGESIDIAMYEVMRLMGQYFMMDYFNGGEMCPRMSKKGDPYIYAGC  
GLYKCADGYIVMELVGITQIEECFKDIGLAHLLGTPEIPEGTQLIHRIECPYGPLVEEKLDAWLA  
THTIAEVKERFAELNIACAKVLTVPESNPQYVARESITQWQTMGRTCKGPNIMPCKFNPNPQ  
IWRGMPSHGMDTAAILKNIGYSENDIQELVSKGLAKVEDSTHHHHHH

>1GPIA

QQAGTNTAENHPQLQSQQCTTSGGCKPLSTKVVLDNWRVHSTSGYTNCYTGNEWDTSCLCPDGK  
TCAANCALDGADYSGTYGITSTGTALTLLKFTVTSNVSRYLMADDTHYQLLKLNLQEFTFDMDM  
SNLPCGLNGALYLSAMDADGGMSKYPGNKAGAKYGTGYCDSQCPKDIKFINGEANVGNWTEGNS  
TGTGSYGTCCSEMDIWEANNDAAAFTPHPCCTTGTQTRCSGDDCARNTGLCDGDGDFNSFRMGDK  
TFLGKGMTVDTSKPFVTVTQFLTNDNTSTGLTSEIRRIYIQNGKVIQNSVANI PGVDPVNSITDN  
FCAQQKTAFGDTNWFAQKGLKQMGELGNGMVLALS IWDDHAANMLWLDSDYPTDKDPSAPGVA  
RGTCATTSGVPSDVESQVPNSQVVFVSNIKFGDIGSTFSGTS

>1CMNA

ASGAPSPFSSRASGPEPPAEFAKLRATNPVSQVKLFDGSLAWLVTKHKDVCVATSEKLSKVRTR  
QGFPELSASGKQAAKAKPTFVDMDPPEHMHQSRMVEPTFTPEAVKNLQPYIQRTVDDLLEQMKQK  
GCANGPVDLVKEFALPVPSYI IYTLLGVFPNDLEYLTQQNAIRTNSSSTAREASAAQELLDYLA  
ILVEQRLVEPKDDIISKLCTEQVKPGNIDKSDAVQIAFLLL VAGNATMVNMIALGVATLAQHPDQ  
LAQLKANPSLAPQFVEELCRYHTAVALAIKRTAKEDVMIGDKLVRANEGIIASNQSANRDEEVFE  
NPDEFNMNRKWPQDPLGFGFGDHRCIAEHLAKAELTTVFSTLYQKFPDLKVAVPLGKINYTPLN  
RDVGIVDLPVIF

>1LRIA

TACTASQQTAAYKTLVSI LSDASFNQ CSTDSGYSMLTAKALPTTAQYKLMCASTACNTMIKKIVT  
LNPPNCDLTVPTSGLVLVVSYANGFSNKSSL

>2QECA

GMSPTVLPATQADFPKIVDVLVEAFANDPTFLRWIPQDPGSAKLRALFELQIEKQYAVAGNIDV  
ARDSEGEIVGVALWDRPDGNHSAKDQAAMLRLVSI FGIKAAQVAWTDLSSARFHPKFPHWYLYT  
VATSSSARGTGVGSALLNHGIARAGDEAIYLEATSTRAAQLYNRLGFVPLGYIPSDDDGTPELAM  
WKPPAMPTV

>1VAJA

MVFKIKDEWGEFLVRLARRAIEEYLKTGKEIEPPKDTPELWEKMGVFVTLNRYNVPPQTALRGC

IGFPTPIYPLVEATIKAAIYSAVDDPRFPPVKLEEMDNLVVEVSVLTPPELIEGPPPEERPRKIKV  
GRDGLIVEKGIYSGLLLPOVPVEWGWDEEEFLAETCWKAGLPPDCWLDEDTKVYKFTAEIFEEY  
PRGPIKRKPLVLEHHHHH

>1D7EA

VAFGSEDIENTLAKMDDGQLDGLAFGAIQLDGDGNILQYNAAEGDITGRDPKQVIGKNFFKDVAP  
CTDSPEFYGKFKEGVASGNLNTMFEYTFDYQMTPTKVKVHMKKALSGDSYVWFVKRV

>1YNVX

DVSGTVCLSALPPEATDTLNLIASDGPFPYSQDGVVFNRESVLPTQSYGYYHEYTVITPGARTR  
GTRRIITGEATQEDYYTGDHYATFSLIDKTC

>1XH9A

GNAAAAKKGSEQESVKEFLAKAKEDFLKKWENPAQNTAHLDQFERIKTLGTGSFGRVMLVKHMET  
GNHYAMKILDKQKVVLKEIEHTLNEKRILQAVNFPFLVKLEFSFKDNSNLYMVMEYAPGGEMFS  
HLRRIGRFSEPHARFYAAQIVLTFEYLHSLDLIYRDLKPENLMIDQQGYIKVTFDGLAKRVKGR  
WTLCGTPEYLAPIIILSKGYNKAVDWWALGVLIYEMAAGYPPFFADQPIQIYEKIVSGKVRFP  
FSSDLKDLLRNLLQVDLTKRFGNLKNGVNDIKNHKWFATTDWIAIYQRKVEAPFIPKFKGPGDTS  
NFDDYEEEEIRVSINEKCGKEFSEF

>3OIRA

SNADGLEGMDDPDATSKKVPLGVEIYEINGPFFFGVADRLKGVLDVIEETPKVFI LRMRVPVI  
DATGMHALWEFQESCEKRGTI LLLSGVSDRLYGALNRF GFIEALGEERVFDHIDKALAYAKLLVE  
TAEER

>2V4CA

ADYDLKFGMNAGTSSNEYKAAEMFAKEVKEKSQGKIEISLYPSSQLGDDRAMLKQLKDGLDFTF  
AESARFQLFYPEAAVFALPYVISNYNVAQKALFDTEFGKDLIKMKDKDLGVTLLSQAYNGTRQTT  
SNRAINSIADMKGLKLRVPNAATNLAYAKYVGASPTPMAFSEVYLALQTNVAVDGOENPLAAVQAQ  
KFYEVQKFLAMTNHILNDQLYLVSNETYKELPEDLQKVVKDAAENAAYHTKLFVDGEKDLVTF  
EKQGVKITHPDLVPFKE SMKPYA EFVKQTGQKGESALKQIEA INPHH

>1JNRA

MVYYPKKYELYKADEVPTVEVETDILIGGGFSGCAAAYEAAWAKLGGLKVTLVEKAAVERSGA  
VAQGLSAINTYIDL TGRSERQNTLEDYVRYVTLDMGLAREDLVADYARHVDGTVHLFEKWGLPI  
WKTPDGKYVREGQWQIMIHGESYKPIIAEAAKMAVGEENIYERVFI FELLKDNNDPNAVAGAVGF  
SVREPKFYVFKAKAVILATGGATLLFRPRSTGEAAGRTWYAI FDTGSGYMGKAGAMLTQFEHR  
FIPFRFKDGYGPVGAWFLFFKCKAKNAYGEEYIKTRAAELEKYKPYGAAQPIPTPLRNHQVMLEI  
MDGNQPIYMHTEEALAE LAGGDKKLLKHIYEEAFEDFLDMTVSQALLWACQNIDPQE QPSEAPA  
EPYIMGSHSGEAGFWVCGPEDLMPEEYAKLFLKYNRMTTVKGLFAIGDCAGANPHKFSSGSFTE  
GRIAAKAAVRFILEQKPNPEIDDAVVEELKKKAYAPMERFMQYKDLSTADDVNPEYILPWQGLVR  
LQKIMDEYAAGIATIYKTNEKMLQRALELLAFLKEDLEKLAARDLHELMRAWELVHRVWTAEAHV  
RHMLFRKETRWPGYYYRTDYPELNDEEWKCFVCSKYDAEKDEWTFEKVPYVQVIEWSF

>2QM0A

SNAMNTTVEKQIIITSNTEQWKMYSKLEGKEYQIHI SKPKQPAPDSGYPVIYVLDGNAFFQTFHE  
AVKIQSVRAEKTGVSPAIIVGVGYPIEGAFSGEERCYDFTPSVISKDAPLKPDPKWPKTGGAHN  
FFT FIEELKPIEKNFEIDKGKQTLFGHXLGGLFALHILFTNLNAFQNYFISSPSIWWNNKSVL  
EKEENLIELNNAKFETGVFLTVGSLEREHMVVGANELSERLLQVNHDKLKFKFYEAEGENHASV  
VPTSLSKGLRFISYV

>2QM6A

MGSSHHHHHHSSGLVPRGSHMASAASYPPKNTKVGLALSSHPLASEIGQKVLEEGGNAIDAAVA  
 IGFALAVVHPAAGNIGGGGFAVIHLANGENVALDFREKAPLKATKNMFLDKQGNVVPKLSYEDGYL  
 AAGVPGTVAGMEAMLKKGKLSQLIDPAIKLAENGYAISQRQAETLKEARERFLKYSSSKKYF  
 FKKGHLDYQEGDLFVQKDLAKTLNQIKTLGAKGFYQGVVAELIEKDMKKNNGGIITKEDLASYNVK  
 WRKPVVGSYRGYKII SMSPPSSGGTHLIQILNVMENADLSALGYGASKNIHIAAEAMRQAYADRS  
 VYMGDADFVSVVVDKLINKAYAKKIFDTIQPDTVTPSSQIKPGMGQLHEGSN

>3GHJA

MGSSHHHHHHSSGRENLYFQGVPMNIKGLFEVAVKVNLEKSSQFYTEILGFEAGLLDSARRWNF  
 LWVSGRAGMVVLQEEKENWQQHFSFRVEKSEIEPLKKALESKGVSVHGPVNQEWMOAVSLYFAD  
 PNGHALEFTAL

>2Z58B

NTIRVIVSVDKAKFNPHEVLGIGGHIVYQFKLIPAVVVDVPANAVGKLLKMPWVEKVEFDHQAVL  
 L

>1CUHA

LPTSNPAQELEARQLGRTRDDLLINGNSASCADVIFIIYARGSTETGNLGLTGPSIASNLESFAFGK  
 DGVWIQGVGGAYRATLGDNALPRGTSSAAIREMLGLFQQANTKCPDATLIAGGYSQGAALAAASI  
 EDLDSAIRDKIAGTVLFGYTKNLQNRGRIPNYPADRTKVCNTGDLVCTGSLIVAAPHLAYGPDA  
 EGPAPFLIEKVRVAVRGS

>1OJQA

AETKNFTDLVEATKWGNSLIKSAKYSSKDMAIYNYTKNSSPINTPLRSANGDVNKLSENIQEQV  
 RQLDSTISKSVTPDSVYVYRLLNLDYLSSITGFTREDLHMLQQTNNGQYNEALVSKLNNLMNSRI  
 YRENGYSSTQLVSGAALAGRPIELKLELPKGTAAAYIDSKELTAYPGQEVLLPRGTEYAVGSVK  
 LSDNKRKIIITAVVFKK

>1NIJA

MNPIAVTLLTGFLGAGKTTLLRHILNEQHGKIAVIENEFGVSVDDQLIGDRATQIKTLTNGCI  
 CCSRSNELEDALLDLDNLDKGNIQFDRLVIECTGMADPGPIIQTFFSHEVLCQRYLLDGVIALV  
 DAVHADEQMNQFTIAQSQVGYADRILLTKTDVAGEAEKLERLARINARAPVYTVTHGDIDLGLL  
 FNTNGFMLEENVVSTKPRFHFIAKQNDISSIVVELDYPVDISEVSRVMENLLESADKLLRYKG  
 MLWIDGEPNRLLFQGVQRLYSADWDRPWGDEKPHSTMVFIGIQLPEEEIRAAFAGLRK

>2O2GA

GMDRTLTHQPQEYAVSVSVGEVVKLGNLVI PNGATGIVLFAHSGSSRYSRPNRYVAEVLQQAGL  
 ATLLIDLTTQEEEEIDLRTLRHLRFDIGLLASRLVGATDWLTHNPDTQHLKVGYFGASTGGGAALV  
 AAAERPETVQAVVSRGGRPDAPSALPHVKAPTLLIVGGYDLPVIAMNEDALEQLQTSKRLVIIP  
 RASHLFEPEGALTAVAQLASEWFMHYLR

>1O2DA

MGSDKIHVVVVVWEFYMPDVFVFGKILEKRGNIIDLLGKRALVVTGKSSSKNGSLDDLKLL  
 DETEISYEIIFDEVEENPSFDNVMKAVERYRNDSDFDVVGGLGGSPMDFAKAVAVLLKEKDLSVED  
 LYDREKVKHWLPPVEIPTTAGTGSEVTPYSILTDEPNKRGCTLMFPVYAFLDPRYTYSMSDEL  
 LSTGVDALSHAVEGYLSRKSTPPSDALAIEAMKIIHRNLPKAI EGNREARKKMFVASC LAGM VIA  
 QTGTTLAHALGYPLTTEKGIKHGKATGMVLPFVMEVMKEE IPEKVDTVNHIFGGSLLKFLKELGL  
 YEKVAVSSEELEKWVEKGSRAKHLKNTPGTFTPEKIRNIYREALGV

>3MR1A

GPGSMIKIHTEKDFIKMRAAGKLAETLDFITDHVKPNVTTNSLNDLCHNFITSHNAIPAPLNYK  
 GFPKSICTSINHVVCHGIPNDKPLKNGDIVNIDVTVILDGWYGDTSRMYVVDVAIKPKRLIQVT

YDAMMKGIEVVRPGAKLGDIGYAIQSYAEKHNYSVVRDYTGHGIGRVFHDKPSILNYGRNGTGLT  
LKEGMFFTVEPMINAGNYDTILSKLDGWTVTTRDKSLSAQFEHTIGVTKDGFEIFTL

>3NJCA

MGHHHHHHSHMKSKFEASIDNLKEIEMNAYAYELIREIVLPDMLGQDYSSMMYWAGKHLARKFPL  
ESWEEFPAFFEEAGWGTLTNVSAKKQELEFELEGPIISNRLKHQKEPCFQLEAGFIAEQIQLMND  
QIAESYEQVKKRADKVVLTVKWDMPV

>3R0NA

MQDVRVQVLPEVRGQLGGTVLPCHELLPPVPGLYISLVTWQRPDAPANHQNVAAAFHPKMGPSFPS  
PKPGSERLSFVSAKQSTGQDTEAELQDATALALHGLTVEDEGNYTCEFATFPKGSVRGMTWLRV

>1FPZA

MKPPSSIQTSEFDSSDEEPIEDEQTPIHISWLSLVRVNCNQFLGLCALPGCKFKDVRNRVQKDTE  
ELKSCGIQDIFVFCRTELKSKYRVPNLLDLYQCGIITHHHPIADGGTPDIASCCEIMEELTTCL  
KNYRKTLIHSYGGLGRSCLVAACLLLYLSDTISPEQAIDSLRDLRGSGAIQTIKQYNYLHEFRDK  
LAAHLSSRDSQRSVSR

>3LX4A

MGSSHHHHHHSQDPNSAAPAAEAPLSHVQQALAEALAKPKDDPTRKHVCVQVAPAVRVAIAETLGL  
APGATTPKQLAEGRLRGLGFDEVFDTLFGADLTIMEEGSELLHRLTEHLEAHPHSDEPLPMFTSCC  
PGWIAMLEKSYPDLPYVSSCKSPQMMLAAMVKSYLEAKKGIAPKDMVMVSIMPCTRKQSEADR  
WFCVDADPTLRQLDHVITTVLGNIFKERGINLAELPEGEWDNPMGVGSGAGVLFGTGGVMEAA  
LRTAYELFTGTPLPRLSLSEVRGMDGIKETNITMVPAPGSKFEELLKHRAAARAEAAAHTPGPL  
AWDGGAGFTSEDGRGGITLRVAVANGLGNAKKLITKMQAGEAKYDFVEIMACPAGCVGGGGQPRS  
TDKAITQKRQAALYNLDEKSTLRRSHENPSIRELYDTYLGEPLGHKAHELLHTHYVAGGVEEKDE  
KK

>1SCTB

SKVAELANAVVSNADQKDLLRMSWGLSVDMEGTGLMLMANLFKTSPSAKGFARLGDVSAGKDN  
SKLRGHSITLMYALQNFVDALDDVERLKCVEKFAVNHINRQISADEFGDIVGPLRQTLKARMGN  
YFDEDTVAAWASLVAVVQASL

>3M1MA

SSNFSSERIRYAKWFLEHGFNIIPIDPESKKPVLKEWQKYSHEMPSDEEKQRFLKMIIEGYNYAI  
PGGQKGLVILDFESKEKLKAWIGESALEELCRKTLCTNTVHGGIHIYVLSNDIPPHKINPLFEEN  
GKGIIDLQSYNSYVGLGSCVNLHCTTDKCPWKEQNYTTCYTYLDELKEISKVDLKSLLRFLAE  
KGRKLGITLSKTAKEWLEGGKKEEEDTVVEFEELRKELVKRDSGKPVKEIKEEICTKSPPKLIKEI  
ICENKTYADVNI DRSGDWHVILYLMKHGVTDPDKILELLPRDSKAKENEKWNQKYFVITLSKA  
WSVVKKYLEA

>3M12A

STHFDVIVVGAGSMGMAAGYQLAKQGVKTLVDAFDPPHTNGSHHGDTRIIRHAYGEGREYVPLA  
LRSQELWYELEKETHHKIFTKTGVLVFGPKGESAFVAETMEAAKEHSLTVDDLLEGDEINKRWPGI  
TVPENYNAIFEPNSGVLFSENCIRAYRELAARGAKVLTHTRVEDFDISPDSVKIETANGSYTAD  
KLIVSMGAWNSKLLSKLNLDIPLQPYRQVVGFFESDESKYSNDIDFPGMVEVPNGIYYGFPSFG  
GCGLRLGYHTFGQKIDPDTINREFGVYPEDESNLRAFLEEYMPGANGELKRGAVCMYTKTLDEHF  
IIDLHPEHSNVVIAAGFSGHGFKFSSGVGEVLSQLALTGKTEHDISIFSINRPALKESLQKTTI

>3BDZA

TSLFTTADHYHTPLGPDGTPHAFFEARDEAETTPIGWSEAYGGHWVAGYKEIQAVIQNTKAFS  
NKGVTFFPRYETGEFELMMAGQDDPVHKKYRQLVAKPFSPEATDLFTEQLRQSTNDLIDARIELGE



GDAATWLANEIPARLTAILLGLPPEDGDTYRRVWVAITHVENPEEGAEIFAELVAHARTLIAERR  
 TNPGNDIMSRVIMSKIDGESLSEDDLIGFFTILLGGIDATARFLSSVFWRLAWDIELRRRLIAH  
 PELIPNAVDELLRFYGPAMVGRVLTQEVTVGDITMKPGQTAMLWFPIASRDRSAFDSPDNIVIER  
 TPNRHLSLGHGIHRCLGAHLIRVEARVAITEFLKRIPEFSLDPNKECEWLMGQVAGMLHVPIIFP  
 KGKRLSE

>1FY3A

IVGGRKARPRQFPFLASIQNGRHFCCGALIHARFVMTAASCFSQSNPGVSTVVLGAYDLRRER  
 QSRQTFSSISSMSENGYDPQQLNDLMLLQLDREANLTSSVTILPLPLQONATVEAGTRCQVAGWGS  
 QRSQGRLSRFPRFVNVTVTPEDQCRPNVCTGVLTRGGICNGDQGTPLVCEGLAHGVASFSLGP  
 CGRGPDDFFTRVALFRDWIDGVLNNPGPGPA

>2VR3A

MGRSHHHHHHSGTDTITNQLTNVTVGIDSGTTVYPHQAGYVKLNYGFSVPNSAVKGDTFKITVVK  
 ELNLNGVTSTAKVPPIMAGDQVLANGVIDSDGNVIYFTFDYVNTKCDVKATLTPAYIDPENVKK  
 TGNVTLATGIGSTTANKTVLVDYEKYKGFYNLSIKGTIDQIDKTNNTYRQTIYVNPSGDNVIAPV  
 LTGNLKPNTDSNALIDQONTSIKVYKVDNAADLSESYFVNPNENFEDVTNSVNIITFPNPNQYKVEF  
 NTPDDQITTPYIVVVNGHIDPNSKGDALRSTLYGYSNI IWRSMWDNEVAFNNGSGSGDGIDC  
 PVVP

>1R8ME

LEANEGSKTLQRNRKMAMGRKKFNMDPKKGIQFLVENELLQNTPEEIARFLYKGEGLNKTAIGDY  
 LGEREELNLAVLHAFVDLHEFTDLNLVQALRQFLWSFRLPGEAQKIDRMMEAFAQRYCLCNPGVF  
 QSTDTCYVLSYSVIMLNTDLHNPVNRDKMGLERFVAMNRGINEGGDLPEELLRNLYDSIRNEPFK  
 IPEDDGND

>1BYPA

AEVLLGSSDGGLAFVPSDLSIASGEKITFKNNAGFPHNDLFDKKEVPAGVDVTKISMPEDLLNA  
 PGEEYSVTLTEKGTYKFYCAPHAGAGMVGKVTVN

>3D0KA

SNAMKPADLTNADRIALELGHAGRNAIPYLDDDRNADRPF TLNTYRPGYTPDRPVVVVQHGVLR  
 NGADYRDFWI PAADRHKLLIVAPTFSDEIWPGVESYNNGRAFTAAGNPRHVDGWTYALVARVLAN  
 IRAAEIADCEQVYLFGHSAGGQFVHRLMSSQPHAPFHAVTAANPGWYTLPTFEHRFPEGLDGVGL  
 TEDHLARLLAYPMTILAGDQDIATDDPNLPSEPAALRQGP HRYARARHYEAGQRAAAQRGLPFG  
 WQLQVVPGIGHDQAMSQVCASLWFDGRMPDAAELARLAGSQSA

>1ZHVA

APRIKLIKILNGSYGIARLSASEAIPAWADGGGFVSITRTDDELSIVCLIDRIPQDVRVDPGWSCF  
 KFQGPFAFDETGIVLSVISPLSTNGIGIFVSTFDGDHLLVRSNDLEKTADLLANAGHSLLLEHH  
 HHHH

>3H3JA

MNKFKGNKVVLIGNGAVGSSYAFSLVNQSI VDELVI IDLDTEKVRGDVMDLKHATPYSPTTVRVK  
 AGEYS DCHDADLVVICAGARQKPGETRLDLVSKNLKIFKSI VGEVMASKFDGIFLVATNPVDILA  
 YATWKFSGLPKERVIGSGTILDSARFRLLLSEAFDVAPRSVDAQI IGEHGDTELPVWSHANIAGQ  
 PLKTLLEQRPEGKAQIEQIFVQTRDAAYDIIQAKGATYYGVAMGLARITEAIFRNEDAVLTVSAL  
 LEGEYEEEDVYIGVPAVINRNGIRNVVEIPLNDEEQSKFAHSAKTLKDIMAEAEELK

>3H36A

SNAVELLQVDADLQAEIVGKYNADLQKAVQIEEKKASEIATEAVKEHVTAEYEERYAEHEEHDR  
 MRDVAEILEQMEHAEVRRLITEDKVRPD

>1Z3EB

MEKEKVLEMTIEELDLSVRSYNCLKRAGINTVQELANKTEEDMMKVRNLGRKSLEEVKAKLEELG  
LGLRKDDG

>3KFFA

EEATSKGQNLNVEKINGEWFSILLASDKREKIEEHGSMRVFVEHIHVLENSLAFKFHTVIDGEC  
EIFLVADKTEKAGEYSVMYDGFNTFTILKTDYDNYIMFHLINEKDGKTFQLMELYGRKADLNSDI  
KEKFVKLCEEHGIKENIIDLTKTNRCLKARE

>2RB8A

MRLDAPSQIEVKDVTDTTALITWMPSPQVDGFELTYGIKDVPGDRTTIDLTEDENQYSIGNLKP  
DTEYEVSLISRRGDMSSNPAKETFTTGLAAALEHHHHHH

>2RBDA

GMGILSGNPQDEPLHYGEVVFSTWTYLSTNNGLINGYRSFINHTGDEDLKNLIDEA IQAMQDENHQ  
LEELLRSNGVGLPPAPPDRPAARLDDIPVGARFNDPEISATISMDVAKGLVTCSQIIGQSIREDV  
ALMFSQFHMMAKVQFGGKMLKLNKNKGWLI PPPLHSDRPIKE

>2W1VA

MSTFRLALIQLQVSSIKSDNLTRACSLVREAAKQGANIVSLPECFNSPYGTTYFPDYAEKIPGES  
TQKLSEVAKESSIYLIGGSIPEEDAGKLYNTCSVFGPDGSLLVKHKRKHILFDIDVPGKITFQESK  
TLPSPGDSFSTFDTPYCKVGLGICYDMRFAELAQIYAQRGCQLLVYPGAFNLTTGPAHWELLQRAR  
AVDNQVYVATASPARDDKASYVAWGHSTVVDPWGQVLT KAGTEETILYSDIDLKKLAEIRQQIPI  
LKQKRADLYTVESKKP

>3OBIA

GMPHHQYVLTLSCPDRAGIVSAVSTFLFENGQNILDAQQYNDTESGHFFMRVVFNAAAKVIPLAS  
LRTGFGVIAAKFTMGWHMRDRETRRKVMLLVSQSDHCLADILYRWRVGLHMIPTAIVSNHPRET  
FSGFDFGDI PFYHFVVKDTRRQQAATAIAQTHTDLVVLARYMQILSDEMSARLAGRCINIH  
HSFLPGFKGAKPYHQAFDRGVKLI GATAHYVTSALDEGPIIDQDVERISHRDTPADLVRKGRDIE  
RRVLSRALHYHLDDRVI LNGRKTVVFTD

>2BZUA

RIAISNSNRTRSVPSTTIWSISPTPNCSIYETQDANLFLCLTKNGAHVLGTITIKGLK GALREM  
HDNALS LKLPFDNQGNLLNCALESSTWRYQETNAVASNALT FMPNSTVYPRNKTAHPGNMLIQIS  
PNITFSVYNEINSGYAFTFKWSAEPGKPFHPPTAVFCYITEQGSHHHHHH

>1Q16A

MSKFLDRFRYFKQKGETFADGHGQLLNTNRDWE DGYRQRWQHDKIVRSTHGVNCTGSCSWKIYVK  
NGLVTWETQQTDYPRTRPDLNHEPRGCPRGASYSWYLYSANRLKYPMMRKRMLKMWREAKALHS  
DPVEAWASIIEDADKAKSFKQARGRGGFVRSSWQEVNELIAASNVYTIKNYGPD RVAGFSPI PAM  
SMVSYASGARYLSLIGGTCLS FYDWYCDLPPASPQTWGEQTDVPESADWYNSSYIIAWGSNVPQT  
RTPDAHFFTEVRYKGTKTVAVTPDYAEIAKLCDLWLAPKQGTDAAMALAMGHVMLREFHLDNPSQ  
YFTDYVRRYTDMPMLVMLEERDGYAAGRMLRAADLVDALGQENNP EWKTVAFNTNGEMVAPNGS  
IGFRWGEKGWNLQRDGKTGEETELQLSLLGSQDIEAEVGFYFGGDGTEHFNKVELENVLLHK  
LPVKRLQLADGSTALVTTVYDLTLANYGLERGLNDVNCATS YDDVKAYTPAWAEQITGVSRSQII  
RIAREFADNADKTHGRSMIIVGAGLNHWYHLDMNYRGLINMLIFCGCVGQSGGGWAHYV GQEKLR  
PQTGWQPLAFALDWQRPARHMNSTSYFYNHSSQWRYETVTAEELLS PMADKSRYTGHLIDFNVRA  
ERMGWLPSAPQLGTNPLTIAGEAEKAGMNPVDYTVKSLKEGSIRFAAEQPENGKNHPRNLF IWRS  
NLLGSSGKGHEFMLKYL LGTEHGIQGKDLGQQGGVKPEEVDWQDNGLEGKLDLVVTLDFRLSSTC  
LYSDIILPTATWYEKDDMNTSDMHPFIHPLSAAVDP AWEAKSDWEIYKAI AKKFSEVCVGH LGKE

TDIVTLPIQHDSAAELAQPLDVKDWKKGECDLIPGKTAPHIMVVERDYPATYERFTSIGPLMEKI  
 GNGGKGIAWNTQSEMDLLRKLNYTKAEGPAKQPMLNTAIDAAEMILTLAPETNGQVAVKAWAAL  
 SEFTGRDHTHLALNKEDEKIRFRDIAQQRKIISSPTWSGLEDEHVSYNAGYTNVHELIPWRTLS  
 GRQQLYQDHQWMRDFGESLLVYRPPIDTRSVKEVIGQKSNGNQEKALNFLTTPHQKWIHSTYSND  
 LLMLTLGRGGPVVWLSEADAKDLGIADNDWIEVFNSNGALTARAVVSQRVPAGMTMMYHAQERIV  
 NLPGSEITQQRGGIHNVSVTRITPKPHTMIGGYAHLAYGFNYGTVGSNRDEFVVVRKMKNIDWLD  
 GEGNDQVQESVK

>3CX5C

MAFRKSNVYLSLVNSYIIDSPQPSSINYWWNMGSLGLCLVIQIVTGIFMAMHYSSNIELAFSSV  
 EHIMRDVHNGYILRYLHANGASFFFMVMFMHMAKGLYYGSYRSPRVTLWNVGVIIIFILTIIATAFL  
 GYCCVYGQMSHWGATVITNLSAIPFVGNDIVSWLWGGFVSNSPTIQRFFALHYLVPFIIAAMVI  
 MHLMALHIHGSSNPLGITGNLDRIPMHSYFIFKDLVTVFVLFMLILALFVYSPNTLGHDPNYIPG  
 NPLVTPASIVPEWYLLPFYAILRSIPDKLLGVITMFAAILVLLVLPFTDRSVVRGNTFKVLSKFF  
 FFI FVFNFLVLLGQIGACHVEVPVLMGQIATFIYFAYFLIIVPVI STIENVLFYIGRVNK

>3I7QA

MFTGSIVAIVTPMDEKGNVCRASLKKLIDYHVASGTS AIVSVGTTGESATLNHDEHADVMMTLD  
 LADGRIPVIAGTGANATAEAI SLTQRFND SGIVGCLTVTPYYNRPSQEGLYQHFKAIAEHTDLPQ  
 ILYNVPSRTGCDLLPETVGR LAKVKNIIGIREATGNLTRVNQIKELVSDDFVLLSGDDASALDFM  
 QLGGHGVISVTANVAARDMAQMCKLAAEGHFAEARVINQRLMPLHNKLFVEPNPI PVKWACKELG  
 LVATDTLRLPMT PITDSGRET VRAALKHAGLL

>3P1GA

GSILAETHGTRPDLTDQPI PDADYTWYTDGSSFLQEGQRRAGAAVTTETEVIWARALPAGTSAQR  
 AELIALTQALKMAEGKKNLVYTD SRYAFATAHVHSEGREIKNKNEILALLKALFLPKRLSIIHCP  
 GHQKGN SAEARGNRMADQAAREAAMKAVLETSTLL

>3EA6A

QGDIGIDNLRNFYTKKDFVDLKDVKDNDTPIANQLQFSNESYDLISESKDFNKFSNFKGKKLDVF  
 GISYNGQCNTKYIYGGVTATNEYLDKSRNIPINIWINGNHKTI STNKVSTNKKFVTAQEIDVKLR  
 KYLQEEYNIYGHNGTKKGEYGHKSKFYSGFNIGKVTFHLNNDTFSYDLFYTGDDGLPKSFLKI  
 YEDNKTVESEKFHLDVDISYKETI

>1EZ6A

ATSTKKLHKEPATLIKAIDGDTVKLMYKGQPMVFRLLLVDI PETKHPKKGVEKYGPEAAAFTKKM  
 VENAKKIEVEFDKGQRTDKYGRGLAYIYADGKMVNEALVRQGLAKVAVYKGNNTHEQLLRKAEA  
 QAKKEKLN IWSEDNADSGQ

>3GXBA

MVLDVAFVLEGS DKIGEADFNRSKEFMEEVIQRMDV GQDSIHVTVLQYSYMTVEYPFSEAQSKG  
 DILQRVREIRYQGGNRTNTGLALRYLSDHSFLVSQGDREQAPNLVYMTGNPASDEIKR LPGDIQ  
 VVPIGVGPANVQELERIGWPNAPILI QDFETLPREAPDLVLQRCCSPHHHHH

>1LG7A

VDEMDTHDPHQLRYEKFFFTVKMTVRSNRPFRTYS DVAAA VSHWDHMYIGMAGKRPFYKILAF LG  
 SSNLKATPAVLADQGGQPEYHAHCEGRAYLPHRMGKTPPMLNVPEHFRPFNIGLYKGTVELTMTI  
 YDDESLEAAPMIWDHFNSKFSDFREKALMFGLIVEKKASGAWVLDVSVSHFK

>2Y0GA

MAHHHHHHGHQHQLVSKGEELFTGVVPILVELDGDVNGHKFSVSGEGEGDATYGKLT LKFICTTG  
 KLPVPWP TLVTTLXVQCFSRYPDHMKQHDFFKSAMPEGYVQERTIFFKDDGNKYKTRAEVKFEGDT

LVNRIELKIDFKEDGNILGHKLEYNYNSHNVYIMADKQKNGIKVNFKIRHNIEDGSVQLADHYQ  
QNTPIGDGPVLLPDNHYLSTQSALS KDPNEKRDHMLLEFVTAAGITLGMDELYK

>1K3UB

TTLNPNYFGEFGMYVPQIILMPALNQLEEFVSAQKDPEFQAQFADLLKNYAGRPTALTKCQNIT  
AGTRTTLYLKREDLLHGGAHKTNQVLGQALLAKRMGKSEIIAETGAGQHGVASALASALLGLKCR  
IYMGAKDVERQSPNVFRMLMGAEVIVHSGSATLKDACNEALRDWSGSYETAHYMLGTAAGPHP  
YPTIVREFQRMIGEETKAQILDKEGRLPDAVIACVGGGSNAIGMFADFINDTSVGLIGVEPGGHG  
IETGEHGAPLKHGRVGIYFGMKAPMMQTADGQIEESYSISAGLDFPSVGPQHAYLNSIGRADYVS  
ITDDEALEAFKTLCRHEGII PALESSHALAHALKMMREQPEKEQLLVNLSGRGDKDIFTVHDIL  
KARGEI

>3NYS

MIEFIDLKNQQARIKDKIDAGIQRVLRHGQYILGPEVTELEDRLADDFVGAKYCISCANGTDALQI  
VQMALGVGPGDEVITPGFTYVATAETVALLGAKPVYVDIDPRTYNLDPQLLEAAITPRTKAII PV  
SLYGQCADFDAINAIASKYGIPIVEDAAQSFGASYKGRSCNLSTVACTSFFPSAPLGCYGDGGA  
IFTNDELATAIRQIARHGQDRRYHHRVGVNSRLDTLQAAILLPKLEIFEEELALRQKVAEYD  
LSLKQVIGITPFIEVNNISVYAQYTVRMDNRESVQASLKAAGVPTAVHYPIPLNKQPAVADEKAK  
LPVGDKAATQVMSLPMHPYLDTASIKIICAALTNLEHHHHHH

>2A6ZA

GSDASKLSSDYSPLDLINTRKVPNNWQTGEQASLEEGRIVLTSNQNSKGSLLWKQGFDLKDSFTM  
EWTFRSVGYSQTDGGISFWFVQDSNI PRDKQLYNGPVNYDGLQLLVDNNGPLGPTLRGQLNDGQ  
KPVDKTKIYDQSFASCLMGYQDSSVPSTIRVTYDLEDDNLLKVQVDNKVCFQTRKVRFPSPGYSRI  
GVTAQNGAVNNAESFEIFKMQFFNGV

>1G72B

YDQONCKEPGNCWENKPGYPEKIIAGSKYDPKHDPVELNKQEESIKAMDARNAKRIANAKSSGNFV  
FDVK

>1A8P

SNLNVERVLSVHHWNTLFSFKTTRNPSLRFENGQFVMIGLEVDGRPLMRAYSIIASPNYEEHLEF  
FSIKVQNGPLTSRLQHLKEGDELMVSRKPTGTLVTSDDLPGKHLMLSTGTGLAPFMSLIQDPEV  
YERFEKVVLHGVQRVNELAYQQFITEHLPOSEYFGEAVKEKLIYYPTVTRESFHNQGRITDLMR  
SGKLFEDIGLPPINPQDDRAMICGSPSMLDESCEVLDGFGFKISPRMGEPGDYLIERAFVEK

>1A8Y

GLDFPEYDGVDRVINVNAKNYKNVFKKYEVLALLYHEPPEDDKASQRQFEMEELILELAAQVLED  
KGVGFGGLVDSEKDAVAKKLGLTEEDSIYVFKEDEVIEYDGEFSADTLVEFLLDVLEDVPELIEG  
ERELQAFENIEDEIKLIGYFKNKDSEHYKAFKEAAEFHPYIPIPFATFDSKVAKKLTCLKNEIDF  
YEAFMEEPVTIPDKPNSEEEIVNFVEEHRSTLRKLPESMYETWEDDMDGIHIVAFEEADPDG  
YEFLEILKSVAQDNTDNPDLISIIWIDPDDFLLVPYWEKTFDIDLSAPQIGVVNVTDADSVWMEP  
SAEELEDWLEDVL

>1ABE

NLKLGFVLKQPEEPWFQTEWKFADKAGKDLGFEVIKIAVPDGEKTLNAIDSLAASGAKGFVICTP  
DPKLGSAIVAKARGYDMKVIIVDDQFVNAKGPMDTVPLVMMMAATKIGERQGGELYKEMQKRGWD  
VKESAVMAITANELDTARRRTTGSM DALKAAGFPEKQIYQVPTKSNDIPGAFDAANSMLVQHPEV  
KHWLIVGMNDSTVLGGV RATEGQGFKAADIIGIGINGVDAVSELSKAQATGFYGSLLPSPDVHG  
KSSEMLYNWVAKDVEPPKFTFTEVTDVVLITRDNFKEELEKKGLGGK

>1AIR

ATDTGGYAATAGGNVTGAVSKTATSMQDIVNIIIDAARLDANGKKVKGAYPLVITYTGNEDSLIN  
 AAAANICGQWSKDPRGVEIKEFTKGITIIIGANGSSANFGIWIKKSSDVVVQNMRIGYLPGGAKDG  
 DMIRVDDSPNVWVDHNELFANHECDGTPDNDDTFESAVIDIKGASNTVTVSYNYIHGVKKVGLDG  
 SSSSDTGRNITYHHNYNDVNARLPLQRGGLVHAYNNLYTNITGSGLNVRQNGQALIENNWFEKA  
 INPVTSRYDGKNFGTWVLKGNNITKPADFSTYSITWTADTKPYVNADSWTSTGTFFPTVAYNYS  
 SAQCVKDKLPGYAGVGKNLATLTSTAC

>1AL3

TWPKGSLYVATHTTQARYALPGVIKGFIERYPVSLMHQGSPTQIAEAVSKGNADFAIATEAL  
 HLYDDLVMPLPCYHWNRSIVVTPEHPLATKGSVSIIEELAQYPLVITYTFGFTGRSELDTAFNRAGLT  
 PRIVFTATDADVIKTYVRLGLGVGVIASMAVDPVSDPDLVKLDANGIFSHSTTKIGFRRSTFLRS  
 YMYDFIQRFAPHLTRDVVDTAVALRSNEDIEAMFKDIKLPEK

>1ALHA

MPVLENRAAQGDITAPGGARRLTGDQTAALRDSLSDKPAKNIILLIGDGMGDSEITAARNYAEGA  
 GGGFFKIDALPLTGQYTHYALNKKTKGPDYVTDASAATAWSTGVKTYNGALGVDIHEKDHPTIL  
 EMAKAAGLATGNVSTAELQDATPAALVAHVTSRKCYGPSATSEKCPGNALEKGGKGSITEQLLNA  
 RADVTLGGGAKTFAETATAGEWQKTLREQAEARGYQLVSDAASLNSVTEANQQKPLLGLFADGN  
 MPVRWLGPATYHGNIKPAVTCCTPNPQRNDSVPTLAQMTDKAIELLSKNEKGGFFLQVEGASIDK  
 QDHAANPCGQIGETVDLDEAVQRALEFAKKEGNTLVIVTANHAHASQIVAPDTKAPGLTQALNTK  
 DGAVMVMSYGNSEEDSQEHTGSQLRIAAYGPHAANVVGLTDQTDLFYTMKAALGLK

>1AMF

GKITVFAAASLTNAMQDIATQFKKEKGVVVSSFASSTLARQIEAGAPADLFI SADQKWM DYAV  
 DKKAIDTATRQTLGNSLVVVAPKASVQKDFITIDSKTNWTSLLNGGRLAVGDPEHVPAGIYAKEA  
 LQKLGAWDTLSPKLAPAEDVRGALALVERNEAPLGIVYGS DAVASKGVKVVATFPEDSHKKVEYP  
 VAVVEGHNNATVKAFYDYLKGPQAAEIFKRYGFTIK

>1AMK

SAKPQPIAAANWKCNGTTASIEKLVQVFNEHTISHDVQCVVAPT FVHIPLVQAKLRNPKYVISAE  
 NAIAKSGAFTGEVSMPIKLDIGVHWVILGHSERRTYGETDEIVAQKVSEACKQGFMIACIGET  
 LQOREANQTAKVVLSQTSIAIAAKLTKDAWNQVVLAYEPVWAIGTGKVATPEQAQEVHLLLRKWVS  
 ENIGTDVAAKLRILYGGSVNAANAATLYAKPDINGFLVGGASLKPEFRDIIDATR

>1AMX

TSSVFYYKTGDMLPEDTTHVRWFLNINNEKSYVSKDITIKDQIQGGQQLDLSTLNINVTGTHSNY  
 YSGQSAITDFEKAFPGSKIITVDNTKNTIDVTIPQGYGSYNSFSINYKTKITNEQQKEFVNNSQAW  
 YQEHGKEEVNGKSFNHTVHN

>1ARB

GVSGSCNIDVVCPEGDGRRIIRA V GAYS KSGTLACTGSLVNNTANDRKMYFLTAHHCGMGTAST  
 AASIVVYWNYQNSTCRAPNTPASGANGDGMSQTQSGSTVKATYATSDFTLLELNNAANPAFNLF  
 WAGWDRRDQNYPGAIAIHHPNVAEKRISNSTSPTSFVAWGGGAGTTHLNVQWQPSGGVTEPGSSG  
 SPIYSPEKRVLGQLHGGPSSCSATGTNRSDQYGRVFTSWTGGGAAASRLSDWLDPASTGAQFIDG  
 LDS

>1ARU

SVTCPPGGQSTSNSQCCVWFDVLDLQTNFYQGSKCESPVRKILRIVFHDAIGFSPALTAAGQFGG  
 GGADGSI IAHSNIELAFPANGGLTDTIEALRAVGINHGVSGDLIQFATAVGMSNCPGSPRLEFL  
 TGRSNSSQPSPPSLIPGPGNTVTAI LDRMGDAGFSPDEVVDLLAAHSLASQEGLNSAIFRSP L DS  
 TPQVFDTQFYIETLLKGTTPG PSLGFAEELSPFPGEFRMRSDALLARDSRTACRWQSM TSSNEV

MGQRYRAAMAKMSVLGFDRNALTDCSDVI PS AVSNNAAPV I PGGLTVDDIEVSCPSEPFPEIATA  
SGPLPSLAPAP

>1A0

CFTPESTALLES GVRKPLGELS IGDRVLSTANGQAVYSEVILFDRNLEQQNFVQLHTDGGAVLTV  
TPAHLVSVWQPESQKLTFFVADRIEEKNQVLVRDVETGELRPQRVVKVGSVRSKGVVAPLTREGT  
IVVNSVAASCYA

>1A4

ASPFRLASAGEISEVQGILRTAGLLGPEKRIAYLGVLDPARGAGSEAEDRRFRVFIHDSVSGARPQ  
EVTVSVTNGTVISAVELDTAATGELPVLEEEFEVVEQLLATDERWLKALAARNLDVSKVRVAPLS  
AGVFEYAEERGRRILRGLAFVQDFPEDSAWAHPVDGLVAYVDVVSKEVTRVIDTGVFPVPAEHGN  
YTDPELTGPLRRTQKPISITQPEGPSFTVTGGNHIEWEKWSLDVGFVDVREGVVLHNI AFRDGDRL  
RPI INRASIAEMVVPYGDPSPIRSWQNYFDTGEYLVGQYANSLELGCDCLGDITYLSPVISDAFG  
NPREIRNGICMHEEDWGILAKHSDLWSGINYTRNRMMVISFFTTIGNDYGFYWYLYLDGTIEFE  
AKATGVVFTSAFPEGGS DNISQLAPGLGAPFHQHIF SARLDMAIDGFTNRVEEEDVVRQTMGPGN  
ERGNAFSRKRTVLTRESEAVREADARTGRTWII SNPESKNRLNEPVGYKLHAHNQPTLLADPGSS  
IARRAAFATKDLWVTRYADDERYP TGFVNQHSGGAGLPSYIAQDRDIDGQDIVVWHTFGLTHFP  
RVEDWPIMPVDTVGFKLRPEGFFDRSPVLDVPAN

>1AYL

MRVNNGLTPQELEAYGISDVHDI VYNPSYD LLYQEELDPSLTGYERGVLTNLGAVAVDTGIFTGR  
SPKDKYIVRDDTTRDTFWWADKKGKNDNKPLSPETWQH LKGLVTRQLSGKRLFVVD AFCGANPD  
TRLSVRFITEVAWQAHFVKNM FIRPSDEELAGFKPDFIVMNGAKCTNPQWKEQGLNSEN FVAFNL  
TERMQLIGGTWYGGEMKKGMFSMMNYLLPLKGIASMHCSANVGEKGDVAVFFGLSGTGKTTLSTD  
PKRRLIGDDEHGWDGDFVNFEGGCYAKTIKLSKEAEPEIYNAIRRDALLENVTVREDGTIDFDD  
GSKTENTRVSYPYIHIDNIVKPVSKAGHATKVI FLTADAFGLPVPVSRLTADQTYHFLSGFTAK  
LAPTPTFSACFGAAFLSLHPTQYAEVLVKRMAAGAQA YLVNTGWNGTGKRISIKDTRAIIDAIL  
NGSLDNAETFTLPMFNLAIPTELPGVDTKILDPRNTYASPEQWQEKAETLAKLFI DNFDKYTDTP  
AGAALVAAGPKL

>1B51A

ADVPAQVQLADKQTLVRNNGSEVQSLDPHKIEGVPE SNVSRDLFEGLLISDVEGHPSPGVAEKWE  
NKDFKVTWFH LRENKWS DGT PVT AHDFVYSWQRLADPNTASPYASYLQYGHIANIDDI IAGKKP  
ATDLGVKALDDHTFEVTLSEFPVYFYKLLVHPSVSPVPKSAVEKFGDKWTQPANIVTNGAYKLN  
WVNERIVLERNPQYWDNAKTVINQVTYLPISSEVTDVNRYSGEIDMTYNNMPIELFQKLKKEI  
PNEVRVDPYLCTYYYEINNQKAPFNDVRVRTALKLALDRDI IVNKVKNQGDLPAYSYTPPYTDGA  
KLVEPEWFKWSQQKRNEEAKLLAEAGFTADKPLTFD LLYNTSDLHKKLAI AVASIWKKNLGVNV  
NLENQEWKTFLDTRHQGTFDVARAGWCADYNEPTSFLNTMLSDSSNNTAHYKSPAFDKLIADTLK  
VADDTQRSELYAKAEQQLDKDSAI VPVYVYVNARLVKPVVGGYTGKDPLDNIYVKNLYI IKH

>1B6A

KVQTDPPSPICDLYPNGVFPKGQECEYPEEKALDQASEE IWNDFREAAEAHRQVRKYVMSWIK  
PGMTMIEICEKLEDCSRKLIK ENGLNAGLAFPTGCSLNNCAAHYTPNAGDTTVLQYDDICKIDFG  
THISGRIIDCAFTVTFNPKYDTLLKAVKDATNTGIKCAGIDVRLCDVGEAIQEVMESEYEIDGK  
TYQVKPIRNLNGHSIGQYRIHAGKTVPIVKGGEATRMEEGEVYAIETFGSTGKGVVHDDMECSHY  
MKNFDVGHVPIRLPRTKHLN VINENFGTLAFCRRWLDRLGESKYLMA LKNL CDLGI VDPYPPLC  
DIKGSYTAQFEHTILLRPTCKEVVSRGDDY

>1BB9

TTGRDLPLPPGFMFKVQAQHDYTATDDELQKAGDVVLVLPFQNPPEEQDEGWLMGVKESDWNQHK  
ELEKCRGVFPENFTEERVQ

>1BDB

MKLKGEAVLITGGASGLGRALVDRFVAEGAKVAVLDKSAERLAELETDHGDNLGIVGDVRSLED  
QKQAASRCVARFGKIDTLIPNAGIWDYSTALVDLPEESLDAAFDEVFHHINVKGYIHAVKACLPA  
VASRGNVIFTISNAGFYPPNGGGPLYTAAKHAIVGLVRELAFELAPYVRVNGVGS GGINS DLRGPS  
SLGPLADMLKSVLP IGRMPEVEEYTGAYVFFATRGDAA PATGALLNYDGGLGVRGFFSGAGGNDL  
LEQLNIH

>1BFD

ASVHGTTYELLRRQGIDTVFGNPGSNELPFLKDFPEDFRYILALQEACVVG IADGYAQASRKPAF  
INLHSAAGTGNAMGALSNAWNSHSPLIVTAGQQTRAMIGVEALLTNVDAANLPRPLVKWSYEPAS  
AAEVPHAMSRAIHMASMAPQGPVYLSVPYDDWDKDADPQSHHLFDRHVSSSVRLNDQDL DILVKA  
LNSASNPAIVLGPVDVAANANADCVM LAERLKAPVWVAPSAPRCPPFTRHPCFRGLMPAGIAAIS  
QLLEGHDVVLVIGAPVFRYHQYDPGQYLKPGTRLISVTCDFLEAARAPMGDAIVADIGAMASALA  
NLVEESSRQLPTAAPEPAKVDQDAGRLHPETVFDTLNDMAPENAIYLN ESTSTTAQMWQRLNMRN  
PGSYYFCAAGGLGFALPAAIGVQLAEPERQVIAVIGDGSANYSISALWTA AQYNIPTIFVIMNNG  
TYGALRWFAGVLEAENVPGLDVP GIDFRALAKGYGVQALKADNLEQLKGS LQEALS AKGPVLIEV  
STV

>1BG2

DLAECNIKVMCRFRPLNESEVNRGDKYIAKFQGEDTVVIASKPYAFDRVFQSSTSQE QVYNDCAK  
KIVKDVLEGYNGTIFAYGQTSSGKTHMEGKLDHEPGMGIIPRIVQDIFNYIYSMDENLEFH IKV  
SYFEIYLDKIRDLLDVSKTNLSVHEDKNRVPYVKGCTERFVCS PDEVMDTIDEGKSNRHVAVTNM  
NEHSSRSHSIFLINVKQENTQTEQKLSGKLYLVDLAGSEKVSKTGAEGAVLDEAKNINKSLSALG  
NVISALAEGSTYVPYRDSKMTRILQDSLGGNCRRTTIVICCS PSSYNESETKSTLLFGQRAKTI

>1BG6

SKTYAVLGLGNGGHAFAYLALKGQSVLAWDIDAQRIKEIQDRGAI I AEGPGLAGTAHPDLLTSD  
IGLAVKDADVILIVVPAIHHASIAANIA SYISEGQLIILNPGATGGALEFRKILRENGAPEVTIG  
ETSSMLFTCRSERPGQVTVNAIKGAMDFACLPAKAGWALEQIGSVLPQYVAVENVLHTSLTNVN  
AVMHPLPTLLNAARCESGTPFQYYLEGITPSVGLAEKVDAERIAIAKAFDLNVP SVCEWYPATI  
YEAVQGNPAYRGIAGPINLNTRYFFEDVSTGLVPLSELGRAVNVPTPLIDAVLDL ISSLIDTDFR  
KEGRTLEKLGSLTAAGIRSAVE

>1CHD

LLSSEKLIAGASTGGTEAIRHVLQPLPLSSPAV IITQHMPPGFTRSF AERLNKLCQISVKEAED  
GERVLPGHAYIAPGDKHME LARSGANYQIKIHGPPVNRHRPSVDVLFH SVAKHAGRNAVG VILT  
GMGNDGAAGMLAMYQAGAWTIAQNEASC VVFGMPREAINMGGVSEVVDLSQVSQQMLAKI SAGQA  
IRI

>1CIY

YTPIDISLSLTQFLLEFVPGAGFVLGLVDI IWGIFGPSQWDAFLVQIEQLINQRIEEFARNQAI  
SRLEGLSNLYQIYAESFREWEADPTNPALREEMRIQFNDMNSALT TAIPLLAVQNYQVPLLSVYV  
QAANLHLSVLRDVS VFGQRWGFDAATINSRYNDLTRLIGNYTDYAVRWYNTGLERVWGPDSRDWV  
RYNQFRRELTTLVLDIVALFSNYDSRRYPRTVSQLTREIYTNPVLENFDG SFRGMAQRIEQNIR  
QPHLMDILNSIT IYTDVHRGFNYWSGHQITASPVGFSGPEFAFPLFGNAGNAAPPVLVSLTGLGI  
FRTLSSPLYRRIILGSGPNNQELFVLDGTEFSFASLT TNL PSTIYRQRGTVDLSLDVIPPQDNSVP  
PRAGFSHRLSHVTMLSQAAGAVYTLRAPTF SWQHRSAEFNNIIPSSQITQIPLTKSTNLGSGT SV

VKGGFTGGDILRRTPSPGQISTLRVNITAPLSQRYRVRIRYASTTNLQFHTSIDGRPINQGNFSA  
 TMSSGSNLQSGSFRTVGFTHPFNFSSNGSSVFTLSAHVFNSGNEVYIDRIEFVPAEVT

>1CLC

IETKVSAAKITENYQFDSRIRLNSIGFIPNHSKKATIAANCSTFYVVKEDGTIVYTGATSMFDN  
 DTKETVYIADFSSVNEEGTYYLAVPGVGKSVNFKIAMNVYEDAFKTAMLGMYLLRCGTSVSATYN  
 GIHYSHGPCHTNDAYLDYINGQHTKKDSTKGWHDAGDYNKYVFNAGITVGSFMAWEHFQDQLEP  
 VALEIPEKNNIPDFLDELKYEIDWILTMQYPDGSGRVAHKVSTRNFGGFIMPENEHDERFFVFPW  
 SSAATADVFAMTAMAARIFRPYDPQYAEKCNAAKVSYEFLKNNPANVFANQSGFSTGEYATVSD  
 ADDRLWAAAEMWETLGDEEYLRDFENRAAQFSKKIEADFWDNVANLGMFTYLLSERPGKNPALV  
 QSIKDSLLSTADSIVRTSQNHGYGRTLGTYYWGCNGTVVRQTMILQVANKISPNNDYVNAALDA  
 ISHFVGRNYNRSYVTGLGINPPMNPDDRSGADGIWEPPWPGYLVGGGWPGPKDWVDIQDSYQTN  
 EIAINWNAALIYALAGFVNYN

>1CNV

DISSTEIAVYWGQREDGLLRDTCKTNNYKIVFISFLDKFGCEIRKPELELEGVCGPSVGNPCSF  
 ESQIKECQRMGVKVFALGPGKGTYSACSADYAKDLAEYLHTYFLSERREGPLGKVALDGIHFDI  
 QKPVDELNWDNLLLELYQIKDVYQSTFLLSAAPGCLSPDEYLDNAIQTRHFDYIFVRFYNDRSCQ  
 YSTGNIQRIRNAWLSWTKSVYPRDKNLFLELPASQATAPGGGYIPPSALIGQVLPYLPDLQTRYA  
 GIALWNRQADKETGYSTNIIRYL

>1COT

DGDAAKEKEFNKCKACHMIQAPDGTDIKGGKTGPNLYGVVGRKIASSEEGFKYEGEILEVAEKN  
 PDLTWTEADLIEYVTDPKPWLVKMTDDKGAKTMTFKMGKNQADVVAFLAQNSPDA

>1CPO

EPGSGIGYPYDNNTLPYVAPGPTDSRAPCPALNALANHGYPHDGRAISRETLQNAFLNHMGIAN  
 SVIELALTNAFVVCYVVTGSDCGDSLNLTLAEPHAFEHDSFSRKDYKQGVANSNDFIDNRNF  
 DAETFQTSLDVVAGKTHFDYADMNEIRLQRESLSNELDFPGWFTEKPIQNVESGFIFALVSDFN  
 LPDNDENPLVRIDWKKYWFNTNESFPYHLGWHPSPAREIEFVTSASSAVLAASVTSTPSSLPSGA  
 IGPGAEEVPLSFASTMTPFLATNAPYYAQDPTLGPND

>1CV8

NEQYVKNLENFKIRETOGNGWCAGYTMSALLNATYNTNKYHAEAVMRFLHPNLQGGQFQFTGLT  
 PREMIYFGQTQGRSPQLLNRMTTYNEVDNLTKNKNGIAILGSRVESRNGMHAGHAMAVVGNAKLN  
 NGQEVIIWNPWDNGFMTQDAKNNVIPVSNGDHYQWYSSYGY

>1CVL

ADTYAATRYPVILVHGLAGTDKFANVVDYWYGIQSDLQSHGAKVYVANLSGFQSDDGPNRGEQL  
 LAYVKQVLAATGATKVNLIHGSQGLTSRYVAAVAPQLVASVTTIGTPHRGSEFADFVQDVLKTD  
 PTGLSSTVIAAFVNVFGLTVSSSHNTDQDALAALRTLTTAQTATYNRNFPASAGLAPGSCQTGAA  
 TETVGGSQHLLYSWGGTAIQPTSTVTGATDTSTGTLDVANVTDPSLALLATGAVMINRASGQND  
 GLVSRCSLFGQVISTSYHWNHLDEINQLLGVGRGANAEDPVAVIRTHVNRLKLQGV

>1CYO

SKAVKYYTLEEIQKHNNKSTWLIILHYKVYDLTKFLEEHPGGEEVLREQAGGDATENFEDVGHST  
 DARELSKTFIIGELHPDDRSKIT

>4FHZA

MHHHHHSSGLVPRGSGMKETAATAKFERQHMDSPDLGTDKAMADIMTRKLTFRGGAAPGEA  
 TSLVVFVLFHGYGADGADLLGLAEPLAPHLPGTAFVAPDAPEPCRANGFGFQWFPIPWLDGSSETAA  
 AEGMAAARDLDAFLDERLAEELPPEALALVGFSGQTMALHVAPRRAEEIAGIVGFSGRLLAP



ERLAEEARSKPPVLLVHGDADPVVPFADMSLAGEALAEAGFTTYGHVMKGTGHGIAPDGLSVALA  
FLKERLPDACGRTRAPPPPLRSGC

>4FHRA

GTKFSKEQLRTFQMIHENFGRALSTYLSGRLRTFVDVEISIDQLTYEEFIRSVMIPSFIVIFTGD  
VFEGSAIFEMRLDLFYTMLDIIMGGPGENPPNRPPTTEIETSIMRKEVTNMLTLLAQAWSDFQYFI  
PSIENVETNPQFVQIVPPNEIVLLVTASVSWGEFTSFINVCWPFSLLEPLLEKLSDR

>4FGZA

MTLIENLNSDKTFLENNQYTDEGVKVYEFIFGENYISSGGLEATKKILSDIELNENSKVLDIGSG  
LGGGCMYINEKYGAHTHGIDICSNIVNMANERVSGNNKIIFEANDILTKEFPENNFDLIYSRDAI  
LHLSLENKKNKLFQKCYKWLKPTGTLITDYCATEKENWDDDEFKEYVKQRKYTLITVEEYADILTA  
CNFKNVVSKDLSDYWNQLLEVEHKYLHENKEEFLKLFSEKKFISLDDGWSRKIKDSKRKMQRWGY  
FKATKN

>4FFXA

GSHMAAGGDHGPSDSYRSPLASRYASPEMCFVFSDRYKFRTRWRQLWLWLAEAEQTLGLPITDEQI  
REMKSLENIDFKMAAEKRLRHVMAHVHTFGHCCPKAAGIIHLGATSCYVGDNTDLIILRNA  
LDLLLPKLARVISRLADFAKERASLPTLGFTHFQPAQLTTVGKRCCLWIQDLCMDLQNLKVRDD  
LRFRGVKGTGTQASFLQLFEGDDHKVEQLDKMVTEKAGFKRAFIITGQTYTRKVDIEVLSVLAS  
LGASVHKICTDIRLLANLKEMEEPFEKQQIGSSAMPYKRNPMRSERCCSLARHMLTLVMDPLQTA  
SVQWFERTLDDSANRRICLAEAFLTADTILNLTQNISEGLVVYPKVIERRIRQELPFMATENIIM  
AMVKAGGSRQDCHEKIRVLSQQAASVVKQEGGDNDLIERIQVDAYFSPIHSQLDHLDPSSFTGR  
ASQQVQRFLEEEVYPLLKPYESVMKVKAELCL

>4AVXA

SMGRGSGTFERLLDKATSQLLLLLETDWESILQICDLIRQGDQAKYAVNSIKKKVNDKNPHVALYA  
LEVMEVSVKNCGQTVHDEVANKQTMEEKDLLKRQVEVNVNRNKILYLIQAWAHAFRNEPKYKVVO  
DTYQIMKVEGHVFPFKESDAMFAERAPDWDAEECHRCRVQFGVMTRKHHCRACGQIFCGKCS  
SKYSTIPKFGIEKEVRVCEPCYEQLNRKAEG

>4FEIA

QGGPWTPAADWRDAGTHLDDLLDVPDAGTLALAEADGGQLTVSGERPGTEHLLRSESRPSGRFVR  
ELAFPEPVRPASGVASLAGGVLTVRFEKLRTIDVTA

>4FF1A

MGGSHHHHHHRSESTVTEELKEGIDAVYPSLVGTADSKAEGIKNYFKLSFTLPEEQKSRTVGVSEA  
PLKDVAQALSSRARYELFTEKETANPAFNGEVIKRYKELMEHGEGIADILRSRLAKFLNTKDVGK  
RFAQGTEANRWVGGKLLNIVEQDGDTFKYNEQLLQTAVALAGLQWRLTATSNTAIKDAKDVAAITG  
IDQALLPEGLVEQFDTGMTLTEAVSSLAQKIESYWGLSRNPAPLGYTKGIPTAMAAEILAAFVE  
STDVVENIVDMSEIDPDNKKITIGLYTITELDSFDPINSFPTAIEEAVLVNPTEKMMFFGDDIPPVA  
NTQLRNPAVRNTPAQKALKAQATEFYVHTPMVQFYETLGKDRIEELMGAGTLNKELLNDNHAK  
SLEGKNRSVEDSYNQLFSVIEQVRAQSEDISTVPIHYAYNMTRVGRMQMLGKYNPQSAKLVREAI  
LPTKATLDSLNNEDFSAFQLGLAQALDIKVHTMTREVMSDELTKLLEGNLKPAIDMMVEFNNTT  
GSLPENAVDVLNTALGDRKSFVALMALMEYSRYLVAEDKSAFVTPLYVEADGVTNGPINAMMLMT  
GGLFTPDWIRNIAKGLFIGSPNKTMEHRSTADNNDLYQASTNALMESLGKLRSNYASNMPIQS  
QIDSLLSLMDLFLPDINLGENGALELKRGIKKNPLTITTYGSGARGIAGKLVSSVTDIYERMSD  
VLKARAKDPNISAAMAMFGKQAASEAHAEELLARFLKDMETLTSTVPVKKRKGVLELQSTGTGAKG  
KINPKTYTIKGEQLKALQENMLHFFVEPLRNGITQTVGESLVYSTEQLQKATQIQSVVLEDMFKQ  
RVQEKLAEKAKDPTWKKGDFLTQKELNDIQASLNNLAPMIETGSQTFYIAGSENAEVANQVLATN

LDDMRVPMSIYAPAQAGVAGIPFMTIGTGDGMMMQLSTMKGAPKNTLKI FDGMNIGLNDITDA  
SRKANEAVYTSWQGNPIKNVYESYAKFMKNVDFSKLSPEALEAIGKSALEYDQRENATVDDIANA  
ASLIERNLRNIALGVDIRHKVLDKVNLSIDQMAAVGAPYQNNGKIDLSNMTPEQQADELNKLFRE  
ELEARKQKVAKAR

>4FE1A

MTISPPEREKVRVVVDNDPVPTSFEKWAKPGHFDRTLARGPQTTTWIWNLHALAHDFDHTSDL  
EDISRKIFSAHFGLAVVFIWLSGMYFHGAKFSNYEAWLADPTGIKPSAQVWVPIVGGIILNGDV  
GGGFHGIQITSGLFQLWRASGITNEFQLYCTAIGGLVMAGLMLFAGWFHYHKRAPKLEWFQNVES  
MLNHHLAGLLGLGSLAWAGHQIHVSLPINKLLDAGVAAKDIPLPHEFILNPSLMAELYPKVDWGF  
FSGVIPPFTFNWAAYSDFLTFNGGLNPVTGGLWLSDTAHHHLAIAVLFIIAGHMYRTNWGIGHSL  
KEILEAHKGPFTGAGHKGLYEVLTTSWHAQLAINLAMMGSLSIIVAQHMYAMPPYPYLATDYPTQ  
LSLFTHHMWIGGFLVVGAAHGAIFMVRDYPDAMNQNVLDRVLRHRDAIISHLNWVCIFLGFHS  
FGLYVHNDTMRAFGRPQDMFSDTGIQLQPVAQWVQNLHTLAPGGTAPNAAATASVAFGGDVAV  
GGKVAMMPIVLGTADFMVHHIHAFTIHVTVLILLKGVLFARSSRLIPDKANLGRFRFPDGPGRGG  
TCQVSGWDHVFLGLFWMYNCISVVIHFHSWKMQSDVWGTVAPDGTVSHITGGNFAQSAITINGWL  
RDFLWAQASQVIGSYGSALSAYGLLFLGAHFIFWAFSLMFLFSGRGYWQELIESIVWAHNKLVAP  
AIQPRALSIIQGRAVGVAHYLLGGIATTWAFFLARIISVG

>4AVPA

SMGPTSQRRGSLQLWQFLVALLDPSNSHFIAWTGRGMEFKLIEPEEVARRWGIQKNRPAMNYDK  
LSRSLRYYYEKGIMQKVAGERYVYKFVCDPEALFSMAFSDN

>4FD5A

MLDSKLNIRFETISSKYDDVIEHLRQTFFADEPLNKAVNLTRPGQGHPLLEQHSLSTLKD NVS  
IMAISNDGDIAGVALNGILYGNTDIEKSREKLNEIQDESFKKIFKLLYEQNLKINLQFDVDKI  
FEIRILSVDSRFRGKGLAKKLIKSEELALDRGFQVMKTDATGAFSQRVVSSLGFITKCEINYTD  
YLDENGEQIFVVDPPHEKCLKIMCKVIN

>4FCIA

MSAKSRTIGIIGAPFSKGQPRGGVEEGPTVLRKAGLLEKLKEQECDVKDYGDLFPADI PNDS PFQ  
IVKNPRSVGKASEQLAGKVAEVKKNGRISLVGGDHS LAIGSISGHARVHPDLGVIWVDAHTDIN  
TPLTTTSGNLHGQPVSFLLKELKGKIPDVPGFSSWVTPCISAKDIVYIGLRDVPGEHYILKTLGI  
KYFSMTEVDRLGIGKVMEEETLSYLLGRKKRPIHLSFDVDGLDPSFTPATGTPVVGGITYREGLYI  
TEEIYKTGLLSGLDIMEVNP SLGKTPEEVTRTVNTAVAITLACFGLAREGNHKPIDYLNPPK

>4F9KA

MSGLNDIFEAQKIEWHEHHHHHHENLYFQSHMEDESLKGCELYVQLHGIQQVLKDCIVHLCISKP  
ERPMMKFLREHFEEKLEKEENRQILARQKSNS

>4F99B

GPGTRTGRLKKPFVKVEDMSQLYRPFYLQLTNMPFINYSIQKPCSPFDVDKPSMOKQTQVKLRI  
QTDGDKYGGTSIQLQLKEKKKKGYCECCLQKYEDLETHLLSEQHRNFAQSNQYQVVDIVSKLVF  
DFVEYEKDTPKKKR

>4F8CA

MAHHHHHHSSGLEVLFGPPVSHSINNPSIQHVQDFATLSARSLRANVLLNSDDHSVPIHAKNPS  
ELLEAIDNNISQTAQDWGVSIOEVEVILGSSKRIIEPVAGVTANTIMKLF LDNDFSYSFEKGQS  
LSLSQLQERLASLPAHKNFILRVNDGGLGHAYVIDFPATTNPSRDAFLYQSDLGEGVTREVR FED  
WMTQKASHPISLDDINTHFIGIAQDQIDLAHIAKLFVDV DGNVKMLRADHLISHKTSEFNFLFEY  
DLKNLENNMSIIKTH

>4F84A

MGSSHHHHHSSGLVPRGSHMAAASAPVPGPGGASSTARGRIPAPATPYQEDIARYWNNEARPVN  
LRLGDVDGLYHHHYGIGAVDHAALGDPGDGGYEARLIAELHRLESAQAEFLLDHLGPGVPGDTLV  
DAGCGRGGSMVMAHQRFQCKVEGVTLSSAAQAEFGNRRARELGI DDHVRSRVCNMLDTPFEKGTVA  
ASWNNESMYVDLHDVFAEHSRFLRVGGRYVTVTGCWNPRYGQPSKWVSQINAHFECNIHSRREY  
LRAMADNRLVPQTVVDLTPETLPYWELRATSSSLVTGIEEAFIESYRDGSFQYVLIADR

>4F60A

EQAKAQLSNGYNNPNVNASNMYGPPQNMSLPPPQTQTIQGTDPYQYSQCTGRRKALIIGINYIG  
SKNQLRGCINDAHNIFNFLTNGYGYSSDDIVILTDDQNDLVRVPTRANMIRAMQWLKDAQPND  
LFLHYSHGQGTEDLDGDEEDGMDVIYPVDFETQGPIDDEMHDIMVKPLQQGVRLTALFDSCH  
SGTVLDLPYTYSTKGIKEPNIWKDVGQDGLQAAISYATGNRAALIGSLGSIKTVKGGMGNVD  
RERVRQIKFSAADVMLSGSKDNQTSADAVEDGQNTGAMSHAFIKVMTLQPQQSYLSLLQNMKE  
LAGKYSQKPLSSSHPIDVNLQFIM

>2LT5A

RPCKYKLLKSTNKFVTCENQAPVHFVGVGSCGSGSGIFLETSLSAGSDWLTQKKHITNTRDV  
DCDNIMSTNLFHCKDKNTFIYSRPEPVKAICKGIIASKNVLTTFEYLSDCNVTS

>4F52B

GSMDVDTPSGTNSGAGKKRFEVKKWNAVALWAWDIVVDNCAICRNHIMDLCECQANQASATSEE  
CTVAWGVCNHAFHFHCISRWLKTRQVCPLDNREWEFQKYGH

>4F52E

GSMAVEELQSIIKRCQILEEQDFKEEDFGLFQLAGQRCIEEGHTDQLEI IQNEKNKVI IKNMGW  
NLVGPVVRCLLCKDKEDSKRKVYFLIFDLLVKLCNPKELLLGLELIEEPSGKQISQSILLLLQP  
LQTVIQKLNKAYSIGLALSTLWNQLSLLPVPYSKEQIQMDDYGLCQCKALIEFTKPFVEEVID  
NKENSLENEKLDKDELLKFCFKSLKCPLLTAQFFEQSEEGNDPFRYFASEIIGFLSAIGHFPFKM  
IFNHGRKKRTWNYLEFEFEENKQLADSMASLAYLVFVQGIHIDQLPMVLSPLYLLQFNMGHIEVF  
LQRTEESVISKGLELLENSLLRIEDNSLLYQYLEIKSFLTVPQGLVKVMTLCPIETLRKKS LAML  
QLYINKLDSQGYTLFRCLLNTSNHSGVEAFI IQNIKNQIDMSLKRTRNNKWFTGFPQLISLLDLV  
LFLPEGAETDLLQNSDRIMASLNLRLYLVIKDNENDNQTLWTELGNIENNFLKPLHIGLNMSKA  
HYEAEIKNSQEAQSKDLCSITVSGEEIPNMPPEMQLKVLHSAFTFDLIESVLARVEELIEIKT  
KSTSEENIGIK

>4F3WA

GPGSMPDIDWKQLRDKATQVAAGAYAPYSRFPVGAALVDDGRVVTGCNVENVSYGLALCAECGV  
VCALHATGGGRLVALACVDGRGAPLMPCGRCRQLLFEHGGPELLVDHLAGPRRLGDLLEPFHAD  
LTGEP

>4F2ME

YPYDVPDYAGAQPARSPLVPRGSRTANLNGFYPVSSSEVGLVNKSVVLLPSFYTHITIVNITID  
LGMKRSYGGQPIASTLSNITLPMQDNNTDVYICIRSDQFSVYVHSTCKSSLWDNIFKRNC TDVLD  
TAVIKTGTCPFSFDKLNLYLTFNKFCLSLSPVGANCKFDVAARTRTNEQVVRSLYVIYEEGDNIV  
LVPRGSDYKDDDDK

>4F2ZA

MSSQVEHPAGGYKLFETVEELSSPLTAHVGTGRIPLWLTGSLLRCPGLFEVGSEPFYHLFDGQA  
LLHKFDFKEGHVTYHRRFIRTDAYVRAMTEKRIVITEFGTCAFDPCKNIFSRFFSYFRGVEVTD  
NALVNIYPVGEDYYACTETNFITKVNPELLETIKQVDLCNYVSVNGATAHPHIENDGTVYNI GNC  
FGKNFSIAYNIVKIPPLQADKEDPISKSEIVVQFPCSDRFKPSYVHSFGLTPNYIVFVETPVKIN

LFKFLSSWSLWGANYMDCFESNETMGVWLHIADKKRKKYINNKYRTSPFNLFHHINTYEDHEFLI  
 VDLCCWKGFEEVYNYLYLANLRENWEEVKKNARKAPQPEVRRYVLPNIDKADTGKNLVTLPNTT  
 ATAILCSDETIWLEPEVLFSGPRQAFEFQINYOQYGGKPYTYAYGLGLNHFPDRCLKLVKTK  
 ETWVWQEPDSYPSEPIFVSHPDAL EEDDGVVLSVVVSPGAGQKPAYLLILNAKDLSEVARAEVEI  
 NIPVTFHGLFKKS

>4F0VA

MGSSHHHHHSSGENLYFEGSHMASMTGGQQMGRMDSLDQCIVNACKNSWDKSYLAGTPNKDNCS  
 GFVQSVAEELGVPMPRGANAMVDGLEQSWTKLASGAEAAQAAQGFLVIAGLKGRTYGHVAVVI  
 SGPLYRQKYPMCWCGSIAGAVGQSQGLKSVGQVWNRTDRDLNYYVYSLASC SLPRAS

>4F02A

GPLGSMNPSAPSYPMASLYVGD LHPDVTEAMLYEKFS PAGPILSIRVCRDMITRRSLGYAYVNFQ  
 QPADAERALDTMNFVVIKGPVRIMWSQRDPSLRKSGVGNIFIKNLDKSIDNKALYDTFSAFGNI  
 LSCKVVCDENGSKGYGFVHFETQEAAERAIEKMNGMLLNDRKFVFGFRKSRKEREAE LGARAKEF  
 YPYDVPDYAGSSGRIVTD

>4ASUH

AEAAAAQAPAAGPGQMSFTFASPTQVFFNSANVRQVDVPTQTGAFGILAAHVPTLQVLRPGLVVV  
 HAEDGTTSKYFVSSGSVTVNADSSVQLLAEAEVTLDMLDLGAAKANLEKAQSELLGADEATRAE  
 IQIRIEANEALVKALE

>4EY0A

HSNEKWFFHGKLGAGRDGRHIAERLLTEYCIETGAPDGSFLVRESETFVGDYTL SFWRNGKVQHCR  
 IHSRQDAGTPKFFLTDNLVFDSDLYDLITHYQQVPLRCNEFEMRLSEVPVQTNAHESKEWYHASLT  
 RAQAEHMLMRVPRDGAF LVRKRNEPNSYAISFRAEGKIKHCRVQQEGQTVMLGNSEFDSLVDLIS  
 YYEKHPLYRKMMLRYPINEEAELEKIGTAEPDFGALFEGRNPGFYVEANPMP

>4ARZB

MSLEATDSKAMVLLMGVRRCGKSSICKVVFNMQPLDTLYLESTSNPSLEHFSTLIDLAVMELPG  
 QLNYFEPSYDSERLFKSVGALVYVIDSQDEYINAITNLAMIIEYAYKVNPSINIEVLIHKVDGLS  
 EDFKVDAQRDIMQRTGEELELGLDGVQVSFYLT SIFDHSIYEAFSRIVQKLIPELSFLENMLDN  
 LIQHSKIEKAF LFDVNSKIYVSTDSNPVDIQMYEVCSEFIDVTIDLFDLYKAPVLRNSQKSSDKD  
 NVINPRNELQNVSQLANGV I IYLRQMIRGLALVAIIRPNGTDMESCLTVADYNIDIFKKGLEDIW  
 ANARASQAKNSIEDDV

>4EVWA

MIVIPMAGMSSRFFKAGYTQPKYMLEAHGQTLFEHSVNSFAAYFASTPFLFIVRNVYDTAVFVRE  
 KATQLGIKQFYIAELHTETRGQAE TVTLGLEELAKQGVQGSITVFNIDTFRPNFVFPDISQHS  
 DGYLEVFQGGDNWSFAKPEHAGSTKVIQTAEKNPISDL CSTGLYHFNRKEDYLEAYREYVARPS  
 QEWERGELYIAPLYNELIQKGLNIHYHLIARHEVIFCGVPDEYTDFLRQPQPLEHHHHHH

>4EVFA

MPKVTDIANELKQAIDAKDEVQIAFIASEYSAESREKIAKAYVASYGKELPDDIKKALKGGSEES  
 LLMDLFSRHEVRAQHIRDALSGRNDHMAFFDTVILCTPEDWHETVAAYTRMFKKPLVEDFMKDV  
 GRKEDWCLLMEKWMMAHERVSRPGSPEDEAQR LDQAFDQKNTAYLIDFFGTVP SAEYRPIAEAFKA  
 QNGKSIEQAIAT IYTKTDYYTFYCAHFALLGMHRLAAYLINCACNDKGDEKMRRI TGMVVKCL  
 GAKHAYKIYDMGTDIERCFDKRMAPILRTLWRVK

>4EUWA

MAHHHHHHVDDDDKMSENLYFQSSKNKPHVKRPMNAFMVWAQAARRKLADQYPHLHNAELSKTLG

KLWRLLESEKRPFVEEAERLRVQHKKDHPDYKYQPRRRKS

>4ETYA

SMQEGSLPDITIFPNSSLMISQGTFTVVCSYSKHDLYNMVRLKDGSTFMEKSTEPYKTEDEF  
EIGPVNETITGHYSCIYSKGITWRSERKTLELKVIKENVIQTPAPGPTSEHLG

>4ETPB

GASEIAALEKEIAALEKEIAALEKEISKQEKFYNDTYNTVCKELLRSRRENSIIIEQKGTMRVYA  
YVMEQNLPENLLFDYENGVITQGLSEHVYKFNRVIPHLKVSEDCFFFTQEYSVYHDMALNQKKNFN  
LISLSTTPHGSLRESLIKFLAEKDTIYQKQYVITLQFVFLSDDEFSQDMLLDYSHNDKDSIKLKF  
EKHSISLDSKLVIIENGLDLPNFSADHEPNLPHSGMGIKQVQFFPRDSKSDGNNDPVPVDFYF  
IELNNLKSIEQFDKSIKESAEPTPIALVLKKLISDTKSFFLLNLNDSKNVKNLLTISEEVQTQL  
AKRKKKLT

>4ESVA

MSELFSERIPPQSIEAEQAVLGAFLDPAALVPASEILIPEDFYRAAHQKIFHAMLRVADRGEV  
DLVTVTAELAASEQLEEIGGVSYLELADAVPTAANVEYYARIVEEKSVLRRLIRTATSIAQDGY  
TREDEIDVLLDEADRKIMEVSRQKHSGAFKNIKDILVQTYDNIEMLHNRDGEITGIPTGFTELDR  
MTSGFQRSDLIIVAARPSVGKTAFALNIAQNVATKTENVAIFSLEMSAQQLVMRMLCAEGNINA  
QNLRTGKLTPEWGWKLTAMGSLSNAGIYIDDTPSIRVSDIRAKCRRLKQESGLGMIVIDYLQLI  
QGSGRSKENRQQEVSEISRSALKALARELEVPVIALSQLSRSVEQRQDKRPMMSDIRESGSIEQDA  
DIVAFLYRDDYINKDSENKNIIEIIIAKQRNGPVGTVQLAFIKEYNKFVNLERRFDEAQIPPGA

>4ESEA

SNAMSKVLVLKSSILATSSQSNQLADFFVEQWQAAHAGDQITVRDLAAQPIPVLDGELVGLRPS  
GTALTFRQQEALALSDELIAELQANDVIVIAAPMYNFNIPTQLKNYFDMIARAGVTFRYTEKGPE  
GLVTGKRAIILTSRGGIHKDTPDLDVVPYLRFLFLGFIGITDVEFVFAEGIAYGPEVATKAQADAK  
TLAQVVA

>2LS8A

MVCPIDWRAFQSNCFPLTDNKTWAESERNCSGMGAHLMTISTEAEQNFIIQFLDRRLSYFLGLR  
DENAKGQWRWVDQTPFNPRRVFHWKNEPDNSQGENCVVLVYNQDKWAWNDVPCNFEASRICKIPG  
TTLNAENLYFQSHHHHHHWSHPQFEK

>4ERRA

MGQIFTVQELKERAKVFAKPIGASYQGILDQLDLVHQAKGRDQIAASFELNKKINDYIAEHPTSG  
RNQALTQLKEQVTSALGLEHHHHHH

>4EPAA

GAMQTSQQDESTLVVTASKQSSRSASANNVSSTVVSAPELSDAGVTASDKLPRVLPGLNIENSG  
NMLFSTISLRGVSSAQDFYNPAVTLYVDGVPQLSTNTIQALTDVQSVELLRGPQGTLYGKSAQGG  
IINIVTQQPDSTPRGYIEGGVSSRDSYRSKFNLSPIQDGLLYGSVTLLRQVDDGDMINPATGSD  
DLGGTRASIGNVKLRLAPDDQPWEMGFAASRECTRATQDAYVGWNDIKGRKLSISDGSPDPYMR  
CTDSQTLGSKYTTDDWVFNLISAWQQQHYSRTFPGSLIVNMPQRWNQDVQELRAATLGARTVD  
MVFGLYRQNTREKLNAYDMPTMPYLSSTGYTTAETLAAYSDLTWHLTDRFDIGGGVRFSDKSS  
TQYHGSMGNPFGDQGSNDDQVLGQLSAGYMLTDDWRVYTRVAQGYKPSGYNIVPTAGLDAKPF  
VAEKSINVELGTRYETADVTLQAATFYHTKDMQLYSGPVRMQTSLNAGKADATGVELEAKWRFA  
PGSWDINGNVIRSEFTNDSELYHGVRVFPVPRYGAGSSVNGVIDTRYGALMPRLAVNLVGPYF  
DGDNQLRQGTYATLDSGLGWQATERMNISVYVDNLFDRRYRTYGYMNGSSAVAQVNMGRVGIN  
RIDFF

>4EPCA

GSTTSTKPSQPSKPSGGTNNKLTVSANRGVAQIKPTNNGLYTTVYDSKGHKTDQVQKTL SVTKTA  
 TLGNNKFYLVEDYNSGKKYGWVKQGDVVYNTAKAPVKVNQTYNVKAGSTLYTVPWGT PKQVASKV  
 SGTGNQTFKATKQQQIDKATYLYGTVNGKSGWISKYYLTTASKPSNPTKPSTNNQLTVTNNSGVA  
 QINAKNSGLYTTVYDTKGKTTNQIQR TLSVTKAATLGDKKFYLVGDYNTGTNYGWVKQDEVIYNT  
 AKSPVKINQTYNVKPGVKLHTVPWGTYNQVAGTVSGKGDQTFKATKQQQIDKATYLYGTVNGKSG  
 WISKYYLTA

>4EOZA

GSMNVKVP ECLADELGLWENS RFTDCCLCVAGQEFQAHKAILAARSPVFSAMFEHEMEESSKN  
 RVEINDVEPEVFKEMMCFIYTGKAPNLDMADDLLAAADKYALERLKVMCEDALCSNLSVENAAE  
 ILILADLHSADQLKT

>4EODA

MAVTDLSLTNSSLMPTLNPMIQQLALAI AASWQSLPLKPYQLPEDLGYVEGRLEGEKLV IENRCY  
 QTPQFRKMELELAKVGKGLDILHCVMFPEPLYGLPLFGCDIVAGPGGVSAAIADLSPTQSDRQLP  
 AAYQKSLAELGQPEFEQQRELPPWGEIFSEYCLFIRPSNVTEERFVQRVVDFLQIHCHQSIVAE  
 PLSEAQTLEHRQGQIHYCQQQQKNDKTRRVLEKAFGEAWAERYMSQVLF DVIQ

>4EO1A

PSEQTPEEICEAKPPIDGVFN NVFKGDEGGFYINYN GCEYEATGVTVCQNDGTVCSSSAWKPTGY  
 VPESG

>4EN6B

QTILPYPNGLYVINKGDGYMRTNDKDLIGTLLIESSTSGSIIQPRLRNTTRPLFN TSNPTIFSQE  
 YTEARLNDAFNIQLFNTSTTLFKFVEEAPTNNKISMKVYNTYEKYELINYQNGNIDDKAEYYLPS  
 LGKCEVSDAPSPQAPVVETPVDQDGF IQTGNENIIVGVINPSENIEEISTPI PDDYTYNIPTSI  
 QNNACYVLFKVNTTGVYKITTNNLPLIIYEAIGSSNRNMNSNNLSNDNIKAIKYITGLNRS DA  
 KSYLIVSLFKDKNYYIRIPQISSSTSQLIFKRELGNISDLADSTVNILDNLNTSGTHY YTRQSP  
 DVGNYISYQLTIPGDFNNIASSIFSFRTRNNQIGITLYRLTESINGYNLITINNYSDLLNNVEPI  
 SLLNGATYIFRVKVT ELNNYNIIFDAYRNS

>4EMOA

GSMAPPAGGAAAAADLGSAAVLM AVHA AVRPLGAGPDAEAQLRRLQLSADPERPGRFRLELLGA  
 GPGAVNLEWPLESVSYTIRGPTQHELQPPPGPGT LSMHFLNPQEAQRWAVLVRGATVEGQNGS

>4AQ1A

MASFTDVAPQYKDAIDFLVSTGATKGTETKFGVYDEITRLDAAVILARVLKLDVGN AKDAGFTD  
 VPKDRAKYVNALVEAGVLNGKAPGKFGAYDPLTRVEMAKI IANAHLKADDDVKLPFTDVNDTWAP  
 YVKALYKYEVTKGKTPTSFGAYQNI TRGDFAQFVYRAVNINAVPEIVEVTAVNSTTVKVT FNTQI  
 ADVDFTNFAIDNGLTVTKATLSRDKKSVEVVVNKPFTRNQEYTTITATGIKNLGETAKELTGK FV  
 WSVQDAVTVALNNSSLKVGEESGLTVKDQDGKDVVGAKVELTSSNTNIVVVS SGEVSVSAAKVTA  
 VKPGTADVTAKVTL PDGVVLTNTFKVTVTEVPVQVQNGFTLVDNLSNAPQNTVA FNKAEKVTSM  
 FAGETKTVAMYDTKNGDPETKPVDFKDATVRSLNPI IATAAINGSELLVTANAGQSGKASFEVTF  
 KDNTKRTFTVDVKKEPVLQDIKVDATSVKLSDEAVGGGEVEGVNQKTIKVS AVDQYGKEIKFGTK  
 GKVTVTNTTEGLVIKNVNSDNTIDFDSGNSATDQFVVVATKDKIVNGKVEVKYFKNASDTTPTST  
 KTIITVNVVNKADATPVGLDIVAPSEIDVNAPNTASTADVDFINFESVEIYTLDSNGNRLK KVT  
 TATTLVGTNDYVEVNGNVLQFKGNDEL TLLTSSSTVNVDVTADGITKRIPVKYINSASVPASATV  
 ATSPVTVKLNSSDNDLTFEELIFGVIDPTQLVKDEDINEFIAVSKAAKNDGYLYNKPLVTVK DAS  
 GEVIPTGANVYGLNH DATNGNIWFDEEQAGLAKKFSVDVHFDVDFSLANVVKTGSGTVSSSPSLSD  
 AIQLTNSGDAVSFTLVIKS IYVKGADKDDNNLLAAPVSVNVTVTKGS

>4EMZB

MGGKWSKSSVIGWPAVRERMRAEPAADGVGAVSRDLEKHGAISSNTAANNAACAWLEAQEEEE  
 VGFVTPQVPLRPMTYKAAVDLSHFLKEKGGLEGLIHSQRRQDILDLWIYHTQGYFPDWQNYTPG  
 PGVRYPLTFGWCYKLVPEPDKVVEANKGENTSLLHPVSLHGMDDPEREVLEWRFD SRLAFHHVA  
 RELHPEYFKNC

>4EMKB

MDSSPNEFLNKVIGKKVLIRLSSGVVDYKGILSCLDGYMNLALERTTEYVNGKKTNVYGDAFIRGN  
 NVLYVSALDD

>4EMCC

QKKRFLPQSVLIKREDEIAFDDFHL DARKVLNDLSATSENPFSSSPNTKKIKSKGKTLEVVPKKK  
 NKKII

>4ELLA

GEFNTIQQLMMILNSASDQPSENLISYFNNTVNPKE SILKRVKDIGYIFKEKFAKAVGQGCVEI  
 GSQRYKLGVRLYRVMESMLKSEEERLSIQNF SKLLNDNIFHMSLLACALEVVMATYSRSTSQNL  
 DSGTDLSFPWILNVLNLKAFDFYKVI ESFIKAEGNLTREMIKHLERCEHRIMESFAWLSDSPLFD  
 LIKQSKDREGPTDHLESACPLNPLQNNHTAADMYLEPVRAPKKKGSTTRVNSTANAETQATSFAF  
 QTQKPLKSTSLSLFYKKVYRLAYLRNLTL CERLLSEHPELEHI IWTLFQHTLQNEYELMRDRHLD  
 QIMMSMYGICKVKNIDLKFKI IVTAYKDLPHAVQETFKRVLIKEEEYDSII VFYNSVFMQRLKT  
 NILQYASTRPPTLAPIPHIPR

>3VRCA

ADLSPEEQIETRQAGYAFMAWNMGKIKANLEGEYNADQVRAAANVVAAIANS GMGALYGP GTDKN  
 VGAVKTRAKPELFQNL EDV GKLARDLGTAANALAAAAATGEANAVKSAFADVGAACKACHQKYRA  
 D

>3VR8A

MLRAVRALICRIGARRTLSVSSRLDVSTSNIAQYKVIDHAYDVVIIGAGGAGLRAAMGLGEAGF  
 KTAVVTKMFPTRSHTTAAQGGINAALGSMNPDDWKWHFYDTAKGSDWLGDNAMHYLTRNAVEAV  
 TELENFGMPFSRTPEGKIYQRSFGGQSNNYKGGVAKRTCCVADRTGHSMLHTLYGNSLRCHCTF  
 FIEYFALDLLMDKGRCVGVIALCLEDGTIHRFRSKRTIVATGGYGRAYFSCTTAHMNTGDGTALA  
 TRAGIALEDLEFIQFHPTGIYGVGCLITEGSRGEGGFLVNSEGERFMERYAPKAKDLASRDVVS  
 AETIEIMEGRGVGPEKDHIYQLHHLPAEQLHQRLPGISETAKIFAGVDVTKEPIPIVPTVHYNM  
 GGIPTNYKAQVIKYTKEGGDKIVPGLYACGECACHSVHGANRLGANSLLDAVVFGRACSINIKEE  
 LKPDEKIPPELPEGAGEESIANDAVRYANGDVPTAELRLTMQKTMQKHAGVFRRGDILAEGVKKM  
 MDLSKELKRLKTTDRSLIWNSDLTESLELQNLMLNATQTIVAAENRKE SRGAHARDDFPKREDEY  
 DYSKPIEGQTKRPFKHWKHTLTKQDPRTGHITLDYRPVIDKTLDPAEVDWIPPIIRSY

>4EJOA

SNAMAYDDIVSSMVLELRRGTLVMLVLSQLREPAYGYALVKS LADHGIPIEANTLYPLMRRLESQ  
 GLLASEWDNGGSKPRKYRRTTDEGLRVLREVEAQWHVLC DGVGKLEETNGEDREHAER

>4EJ7A

MGSSHHHHHSSGRENLYFQGM SHIQRETSCSRPRLNSNLDADLYGYRWARDNVGQSGATIYRLY  
 GKPNAPELFLKHGKGSVANDVTDEMVRNLWLTAFMPLPTIKHFIRTPDDAWLLTTAIPGKTAFQV  
 LEEYPDSGENIVDALAVFLRRLHSIPVCNCPFN SDRVFRLAQAQSRMNGLVDASDFDDERNGWP  
 VEQVWKEMHKLLPFSPDSVVTHGDFSLDNLI FDEGKLIGCIDVGRVGIADRYQDLAILWNCLGEF  
 SPSLQKRLFQKYGIDNPD MNKLQFHLMLDEFF

>4EIYA

MKTI IALS YIFCLVFADYKDDDDGAPPIMGSSVYITVELAIAVLAILGNVLCWAVWLNSNLQNV  
 TNYFVVS LAAADIAVGLAIPFAITISTGFCAACHGCLFIACFVLVLTQSSIFSLLAIAIDRYIA  
 IRIP LRYNGLVTGTRAKGIIAICWVLSFAIGLTPMLGWNNCGQPKEGKNHSQGC GEGQVACL FED  
 VVPMNYMVYFNFFACVLVPLLLMLGVYLRIFLAARRQLADLEDNWETLNDNLKVI EKADNAAQVK  
 DALTKMRAAALDAQKATPPKLEDKSPDSPEMKDFRHGFDIIVGQIDDALKLANEGKVKEAQA AAE  
 QLKTTRNAYIQKYLERARSTLQKEVHAAKSLAIVGLFALCWLPLHIINCFTFFCPDCSHAPLWL  
 MYLAIVLSHTNSVVPFIYAYRIREFRQTFRKIIRSHVLRQQE PFKAHHHHHHHHHH

>2LRKA

AEELEEVMGLI INSGQARSLAYAALKQAKQGDFAAAKAMMDQSRMALNEAHLVQTKLIEGDAGE  
 GKMKVSLV LVEAQLHLMTSMLARELITELIELHEKLKA

>2LRKD

MFQQEVTITAPNGLHTRPAAQFVKEAKGFTSEITVTSNGKSASAKSLFKLQTLGLTQGTVV TISA  
 EGEDEQKAVEHLVKLMAELE

>4EIVA

MHHHHHHENLYFQGGTIYKQFTSR TLLNFFEVAALTDGETNESVAAVCKIAAKDP AIVGVSVRPA  
 FVRFIRQELVKSAPVAGIKVCAAVNFPEGTGTPD TVSLEAVGALKDGADEIECLIDWRRMNENV  
 ADGESRIRLLVSEVKKVVGPKTLKVLSGGELQGGDIISRAAVAAL EGGADFLQTSSGLGATHAT  
 MFTVHLISIALREYMVRENERIRVEGINREGAAVRCIGIKIEVGDVHMAETADFLMQMIFENGPR  
 SIVRDKFRVGGGFNLLKELRDCYESWDSVGVSPDTSP

>4APMA

GSAMGSTPKDIWGRYMAKFDLAKSHGSGIYVDLGGTERV GATQHRMPTGKCPVMGKVINLGN NAD  
 FLNRISAENPQDRGLAFPDTAVAVTRNSNARNRAAAEKTEIILSPVSAADLVRWGYDGNDVANCA  
 EYAGNIIPASDTATKYRYPFVYDAKEEMCHILFTPMQYNRGSR YCDNDGSQDEGTSSLLCMEPMK  
 SGIDAHLYYSSRVDDKWEENCMPYPVKDAIFGRGANGSCVAIESAFE EFTRDAE ECSALMFENA  
 AADLEIDEEADNFDELKTLSDGLRNIAKSKIAQALFSPIAKAGTSAKNSKGVGMNWANYDSNTGL  
 CRVIEETPNCLIIDAGSFAMTAVGSPLEQDAVPFPCDIVTNGYIEPRPRSRHRNTTPIFEVTTAL  
 SREALKCSKYVHEKYSESCGTYYYCSEEKSSWAFWRNLDAALVPR

>2LRJA

GSSISHSGNLYTAGQCTWYVYDKVGGEIGSTWGNANNWAAA AQQAGFTVNHTPSKGAILQSSEGP  
 FGHVAYVESVNSDGSVTISEMNYSGGPFVSSRTISASEAGNYNYIHI

>4EFOA

GPLGSTDILHRMVIHVFSLQQMTAHKIYIHSYNTATIFHEL VYKQTKIISSNQELIYEGRRLVL  
 EPGRLAQHFPKTTEENPIFVVSLE RPHRD

>4EFZA

GPGSMTVEGFFDPATCTISYLLFDSGSGECALIDSVLDYDPKSGRTRTASADQLIARVAALGARV  
 RWLLETHVHADHLSAAPYLKTRVGG EIAIGRHVTRVQDVFGKLFNAGPAFAHDG SQFDRLLDDGD  
 TLALGALSIRAMHTPGHTPACMTYV VTEAHAAHDARDAAAFVGD TLFMPDYGTARCDFPGGDARS  
 LYRSIRKVLSPATRLYMCHDYQPNGRAIQYASTVADELRENVHIREGVTEDDFVAMRTARDAT  
 LDMPVLM LPSVQVNM RAGRLPEPEDNGVRYLKIPLDAI

>4AOWA

MHHHHHHSSGVDLGTENLYFQSMTEQMTLRGTLKGHN GWTQIATTPQFPDMILSASRDKTIIM  
 WKLTRDETNYGIPQRALRGHSHFVSDVVISSDGQFALSGSWDGT LRLWDLTTGTTTRRFVGH TKD  
 VLSVAFSSDNRQIVSGSRDKTIKLWNTLG VCKYTVQDESHSEWVSCVRFSPNSSNPIIVSCGWDK  
 LVKVVNLANCKLKTNIHIGHTGYLNTVTVSPDGS LCASGGKDGQAMLWDLNEGKHLTYLTDGGDIIN



ALCFSPNRYWLCAATGPSIKIWDLEGKIIVDELKQEVISTSSKAEPPOCTSLAWSADGQTLFAGY  
TDNLVRVWQVTIGTR

>4EFIA

MSSPDFSAGRELRTQGARIAGVVSCVPSKQVDNDYFVERFDASAVRDVVKMIGVNRRRWADAQTS  
AGDLCKRAGEKLLAGLGWQADSIDALIFVSQTPNYRLPATAFVLQAELDLPASCLALDINLGCSG  
YPQALWLGMNLIQTGAARKVLLAVGDTISKMIDPTDRSTSLFGDAGTMTALETSSNGDAAAHFII  
GADGKGARNLIVPSGGFKPYDAAADERMAGKSPECLFMDGGEI FNFTLNAVPKLVSRITLDIAGRD  
KDSYDAFLFHQANLFMLKHLAKKAGLPAERVPVNI GEYGN TSCASIPLLITTELKDRDLKEETLQL  
GMFGFGVGYSWASAALAVGPLNIVDTIET

>4EEEE

MECVKTRSVNIHVPVKETSKVVLECRGDSYFRHFSYVYWIIGKNKTVDQLPPNSGYRERIYLFKK  
PHRCENRPRADLILTNITDEMRNEKLTCLVIDPKDPLKESVILSKIWNVCYKI

>2LRDA

AMGKCSVLKVVACAAAIAGAVAACGGIDLPCVLAALCAAEGCASCFCEDHCHGVCKDLHLC

>4EEIA

MIKRYDVAEISKIWADENKYAKMLEVELAILEALEDRMVPGTAAEIRARAQIRPERVDEIEKVT  
KHDIIAFCTSI AEQFTAETGKFFHFGVTSSDIIDSALSLQIRDSMSYVIKDLEALCDSLTKAEE  
TKEIITMGRSHGMFAEPMSFGQKFLGAYVEFKRRLKDLKDFQKDGLTVQFSGAVGNYCILTTEDE  
KKAADILGLPVEEVSTQVI PRDRIAKLISIHGLIASAIERLAVEIRHLHRSVDVFEVYEGFSKGQK  
GSSTMPHKKNP ISTENLTGMARMLRSHVSIALENCVLWHERDISHSSAERFYLPDNFGIMVYALR  
RMKNTIDNLVVQRDIIEDRVRST SAYLSSFYLHFLVANTPFMREDCYKIVQQAFLDKQGESFSK  
KLQKVMHDEHNIILDIPEMDFEGIKKTYLKEIDHVFDRSVKARGENLY

>4EDFA

MFEIKKICIGAGYVGGPTCSVIAHMCPEIRVTVVVDVNESRINAWNSPTLPIYEPGLKEVVESCR  
GKNLFFSTNIDDAIKEADLVFISVNTPTETYGMGKGRAADLKYIEACARRIVQNSNGYKIVTEKS  
TVPVRAAESIRRIFDANTKPNLNLQVLSNPEFLAEGTAIKDLKNPDRVLI GGDETP EGQRAVQAL  
CAVYEHVWPREKILTTNTWSSELSKLAANAFLAQRISINSISALCEATGADVEEVATAIGMDQR  
IGNKFLKASVGGSCFQKDVNLNLVYLCEALNLPEVARYWQQVIDMNDYQRRRFASRIIDSLFNT  
VTDKKIAILGF AFKKDTGDTRESSSIYISKYLMDEGAHLHIYDPKVPREQIVVDLSHPGVSEDDQ  
VSRLVTISKDPYEACDGAHAVVICTEWDMFKELDYERIHKKMLKPAFIFDGRRLDGLHNELQTI  
GFQIETIGKKVSSKRIPYAPSGEIPKFSLQDPPNKKPKV

>3VQKA

MYYLGKELQKRSEELSRGFYELVYPPVDMYEEGGYLVVVADLAGFNKEKIKARVSGQNELIEAE  
REITEPGVKYLTQRPKYVRKVIRLPYNVAKDAEISGKYENGVLTIIRIPIAGTSVIKIE

>4EBBA

PDPGFQERFFQQLDHFNFERFGNKTFPQRFLVSDRFVWRGEGPIFFYTGNEGDVWAFANNSAFV  
AELAAERGALLVFAEHRYYGKSLPFGAQSTQRGHTELLTVEQALADFAELLRALRRDLGAQDAPA  
IAFGGSYGGMLSAYLRMKYPHLVAGALAASAPVLAVAGLGDNSQFFRDVTADFEQSPKCTQGVR  
EAFRQIKDLFLQGAYDTRWEFGTCQPLSDEKDLTQLFMFARNAFTVLAMMDYPYPTDFLGPLPA  
NPVKVGC DRLLSEAQRITGLRALAGLVYNASGSEHCYDIYRLYHSCADPTGCGTGP DARAWDYQA  
CTEINLTFASNNVTDMFPDLPTDELQRQYCLDTWGVWPRPDWLLTSFWGGDLRAASNIIFSNGN  
LDPWAGGGIRRNL SASVIAVTIQGGAHHLDLRASHPEDPASVVEARKLEATIIGEVKKAARREQQ  
PALRGGPRLSLENLYFQ

>4EAZA

DPNSMRSIASSKLWMLFSAFLERQQDPDTYNKHLFVHISQSSPSYSDPYLETVDIRQIYDKFPE  
 KKGGLKELFERGPSNAFFLVKFWADLNTNIDDEGSAFYGVSSQYESPENMIITCSTKVCSEFGKQV  
 VEKVEYARYENGYLYRIHRSPLCEYMINFIHKLKHLPEKYMMNSVLENFTILQVVTNRDQTE  
 TLLCIAVFEVSASEHGAQHIIYRLVKE

>4EAGC

MESVAAESAPAPENEHSQETPESNSSVYTTFMKSHRCYDLIPTSSKLVVFDTSLQVKKAFFALVT  
 NGVRAAPLWDSKKQSFVGMILTITDFINILHRYKXSALVQIYELEEHKIETWREVYLQDSFKPLVC  
 ISPNASLFDVAVSSLIRNKIHRLPVIDPESGNTLYILTHKRILKFLKLFITEFPKPEFMSKSLEEL  
 QIGTYANIAMVRTTTPVYVALGIFVQHRVSALPVVDEKGRVVDIYSKFDVINLAAEKTYNNDVVS  
 VTKALQHRSHYFEGVLKCYLHETLEAIINRLVEAEVHRLVVVDEHDVVKGIVSLSDILQALVLTG  
 GEKKP

>4E8JA

MKNNNVTEKELFYILDLFEHMKVTYWLDGGWGDVLTGKQQREHRDIDIDFDAQHTQKVIQKLED  
 IGYKIEVHWMPARMELKHEEYGYLDIHPINLNDGSGITQANPEGGNYVFQNDWFSETNYKDRKIP  
 CISKEAQLLFHSGYDLTETDHFDIKNLKSIT

>4E88A

MGGRALRVLVMDGVLADVEGGLLRKFRARFPDQPFIALEDRRGYKACEQYGRRLRPLSEKARSI  
 AESKNFFFELEPLPGAVEAVKEMASLQNTDVFICTSPHKMFKYCPYEKYAWVEKYFGPDFLEQIV  
 LTRDKTVVSADLLIDDRPDITGAEPTPSWEHVLFTACHNQHLLQPPRRRLHSWADDWKAILDSK  
 RPCGSLEHHHHHH

>4AN6A

DYTVHDTDGKPVLNAGQYYILPAKQGGGLGLSNDGNCPLTVSQTPIIDLPIGLPVRFSRA  
 RISHITTALS LNIEFTIAPACAPKPARWRIFNEQSSEKGYTPVKISDDFSSAAPFQIKKFEEDYK  
 LVYCSKSESGERKCVDLGIKIDDEKNRRLVLKEGDPFKVKFKKVDEESSEEWIV

>4E4TA

MAHHHHHHMGTLEAQTQGPMSMTATPDSVSPILPGAWLGMVGGGQLGRMFCFAAQSMGYRVAVLD  
 PDPASPAGAVADRHLRAAYDDEAALAELAGLCEAVSTEFENVPAASLDFLARTTFVAPAGRCVAV  
 AQDRIAEKRFIEASGVPVAPHVVIESAAALAALDDAALDAVLPGILKTARLGVDGKGQVRVSTAR  
 EARDAHAALGGVPCVLEKRLPLKYEVSALIARGADGRSAAFPLAQNVHNGILALTIVPAPAADT  
 ARVEEAQQAAVRIADTLGYVGVLCVEFFVLEDGFSVANEMAPRPHNSGHYTVDACATSQFEQQVR  
 AMTRMPLGNPRQHS PAAMLN ILGDVWF PNGAAAGAVTPP WDTVAAMPAHLHLYGKEEARVGRKM  
 GHVNFTAEMRDDAVAAATACAQLLRVPLD

>4E51A

MAHHHHHHMGTLEAQTQGPMSMTEQKRKLEKLTGVKGMNDILPQDAGLWEFFFEATVKSLLRAYGY  
 QNIRTPIVEHTPLFTRGIGEVTDIVEKEMYSFVDALNGENLTLRPENTA AAVVRAAIEHNMLYDGP  
 KRLWYIGPMFRHERPQRGRYRQFHQVGVEALGFAGPDADAEIVMMCQRLWEDLGLTGIKLEINSL  
 GLAEERAHRVELIKYLEQHADKLDQRRLYTNPLRVLDTKNPALQEI VRNAPKLI DFLGDVS  
 RAHFEGQLRLLKANNVPFTINPRLVRGLDYNNLTVFEWVTDKLGAGQGTVAAGGRYDPLIEQLGGK  
 PTAACGWAMGIERILELLKEEHLVPEQEGVDVYVVHQDAAREQAFIVAERLRDTGLDVI LHCSA  
 DGAGASFKSQMKRADASGAFAVIFGEDEVTNGTASVKPLRGTGDDGEKSVQQSVVESLTEFLI  
 NAMVATAEDGDD

>2LQOA

MVTAALTIYTTSWCGYCLRLKTALTANRIAYDEVDIEHNRAAAEFVGSVNGGNRTVPTVKFADGS  
 TLTNPSADEVKAKLVKIAGLEHHHHHH

&gt;4E1YA

GSHPFQAVVKDPTASYVDVKARRTFLOSGQLDDRLKAALPKEYDCTTEATPNPQQGEMVIPRRY  
 LSGNHGPNPDYEPVVTLYRDFEKISATLGNLYVATGKPVYATCLLNMLDKWAKADALLNYDPKS  
 QSWYQVEWSAATAAFALSTMMAEPNVDTAQRERVVKWLNRVARHQTSPFGGDTSCCNNASYWRGQ  
 EATIIGVISKDELFRWGLGRYVQAMGLINEDGSFVHEMTRHEQSLHYQNYAMLPLTMIAETASR  
 QGIDLAYKENGRIHSARKFVFAAVKNPDLIKKYASEPQDTRAFKPGRGDLNWIYEQRARFGFA  
 DELGFMTVPI FDPRTGGSGTLLAYKPQG

&gt;4E1JA

MHHHHHSSGVDLGTENLYFQSMGGYILAI DQGTSTRAIVFDGNQKIAGVGQKEFKQHFPKSG  
 WVEHDPEEIIWQTVVSTVKEAIEKSGITANDIAAIGITNQRETVVVDRETGKPIHNAIVWQDRRT  
 AAFCDKLKKKGLEKTFVKKTGLLLDPYFSGTKLNWLLSNVKGAVRAAKGELCFGTIDTFLIWRLL  
 TGGEFCFTDATNASRTLLYNIAENAWDELTEVLRVPKEMLEPKDCAADFGVTDPSLFGAAIPI  
 LGVAGDQQAATIGQACFKPGMLKSTYGTGCFALLNTGKDMVRSKNRLLTTIAYRLDGETTYALEG  
 SIFVAGAAVQWLRDGLKVIKAAPDTGSLAESADPSQEVYLVPAFTGLGAPHWDPDARGAIFGMTR  
 NTGPAEFARAALAVCYQTRDLEAMHKDWRNRNGNDTVLRVDGGMVASDWTMQRSLDLDAPVDR  
 PVILETTALGVAVLAGSRAGVWPNQEAFKSWARDRRFEPHMDEATR KVKLKGWRS AVKRTLIAA

&gt;4E0VA

MNVFFMFSKPGKLABDRNPLEECFRETDYEEFLEIAKNGLSTTSNPKRVVIVGAGMSGLSAAYVL  
 ANAGHQVTVLEASERAGGQVKTYRNEKEGWYANLGPMLPEKHRIVREYIRKFGQLNEFSQENE  
 NAWYFIKNIRKRVGEVNKDPGVLDYVVKPSEVGSAGQLYEESLQKAVEELRRTNCSYMLNKYDT  
 YSTKEYLLKEGNLSPGAVDMIGDLLNEDSGYVVSFIESLKHDDIFAYEKRFDEIVGMDKLPSTSM  
 YQAIQEKVHLNARVIKIQQDVKEVTVTYQTSKETLSVTADYVIVCTTSRAARRIKFEPPLPPKK  
 AHALRSVHYRSGTKIFLTCTKKFWEDDGIHGKSTTDLPSRFIYYPNHNFPNGVGVIIAYGIGDD  
 ANYFEALDFEDCGDIVINDLSLIHQLPKEEIQAI CRPSMIQRWSLDKYAMGGITTFPTYQFQHS  
 EALTAPVDRIYFAGEYTAQAHGWIASTIKSGPEGLDVNRASE

&gt;4E0IA

MKAIDKMTDNPPQEGLSGRKIIYDEDGKPSRSCNTLLDFQYVTGKISNGLKNLSSNGKLAGTGAL  
 TGEASELMPGSRTYRKVDPPDVEQLGRSSWTLHLSVAASYPAQPTDQKQKEMKQFLNIFSHIYPC  
 NWSAKDFEKYIRENAPQVESREELGRWMCEAHNKVNKKLRKPKFDCNFWEKRWKDGWDE

&gt;4DYLA

SMGFSSELCS PQGHGVLQMQEAE LRLLEGMRKWWAQRVKS DREYAGLLHHMSLQDSGGQSRAIS  
 PDSPI SQSWAEITSQTEGLSRLLRQHAEDLNSGPLSKLSLLIRERQQLRKYSEQWQQLOQELTK  
 THSQDIEKLSQYRALARDSAQAKRKYQEASKDKDRDKAKDKYVRS LWKLF AHHNRYVLGVRAAQ  
 LHHQHHLQLLLPGLLRSLQDLHEEMACILKEILOEYLEISSLVQDEVVAIHREMAAAAARIQPEA  
 EYQGFLRQYGSAPDVPPCVTFDES LLEEGEPLEPGELQLNELTVESVQHTLTSVTDELAVATEMV  
 FRRQEMVTQLQOQELRNEEENTHPRERVQLLGRQVLQEQALQGLQVALCSQAKLQAQQEELLQTKLE  
 HLGPGEPVLLLQDD

&gt;4DXRA

GPGGSGGVTEEQVHHIVKQALQRYSEDRIGLADYALESGGASVISTRCS ETYETKTALLSLFGIP  
 LWYHSQS PRVILQPDVHPGNCWAFQGPQGFVAVRLSARIRPTAVTLEHVPKALSPNSTISSAPKD  
 FAIFGFDEDLQOQEGTLLGKFTYDQDGEPIQTFHFQAPT MATYQVVELRILTNWGHPEYTCIYFR  
 VHGEPAH

&gt;3VP7A

INIFNATFKISHSGPFATINGLRLGSIPE SVVPWKEINAALGQLILLLATINKNLKINLVDYELQ



NLVPGLMRKLMFEGRNSSLSKLLPLMAWLFHEPNPIGINTALAQLGVSRPVFRLPYVPLPLSKR  
LEFVKLVKEIGREHFVGEKDVQALDDDDFILIGRY

>4DOTA

MRAPIPEPKPGDLIEIFRPFYRHWAIVYVDGYVVHLAPPSEVAGAGAASVMSALTDKAIVKKELL  
YDVAGSDKYQVNNKHDDKYSPLPCSKIIQRAEELVQGQEVLYKLTSSENCEHFVNELRYGVARSDQV  
RDLEHHHHHH

>4DOJA

LENPTNLEGKLADAEIIIILEGEDTQASLNWSVIVPALVIVLATVVWGIGFKDSFTNFASSALSA  
VVDNLGWAFILFGTVFVFFIVVIAASKFGTIRLGRIDEAPEFRTVSWISMMFAAGMGIDLMFYGT  
TEPLTFYRNGVPGHDEHNVGAMSTTMFHWTLHPWAIYAIVGLAIAYSTFRVGRKQLLSSAFVPL  
IGEKGAEGLGKLDILAI IATVFGTACSLGLGALQIGAGLSAANI IEDPSDWTIVGIVSVLTLA  
FIFSAISGVGKGIQYLSNANMVLAALLAIFV FVVGPVTSILNLLPGSIGNYLSNFFQMAGRTAMS  
ADGTAGEWLGSWTIFYWAWWISWSPFVGMFLARISRGRSIREFILGVLLVPAGVSTVWFSIFGGT  
AIVFEQNGESIWDGAAEEQLFGLLHALPGGQIMGIIAMI LLGTFITTSADSASTVMGTMSQHGO  
LEANKWVTAAGWVATAAIGLTL LLSGGDNALS NLQNVTVAAATPFLFVVI GLMFALVKDLSNDVI  
YLEYREQQRFNARLARERRVHNEHRKRELA AKRRRERKASGAGKRR

>4AIEA

MASASWKNNAVYQVYPKSFQDSNGDGIGDLQGIISRLDYLEKLGIDAIWLSPVYQSPGVDNGYD  
ISDYEAIDPQYGT MADMDELISKAKEHHIKIVMDLVVNHTSDQHKWFVEAKKGDKNQYRDYYIWR  
DPVDEHEPNLKSASFSGSAWKYDERSGQYYLHFFADQQPDLNWQNTL RQKIYNMMNFWLDKGIG  
GFRMDVIELIGKDPDKNIRENGPMLHPYLQEMNKATFGKRDVMTVGETWNATPKIAEEYSDPDRH  
ELSMVFQFENQSLDQPGKEKWDLPDLGELK KVLVKWQTKIDFDHAWNSLFWENHDI PRVISR  
WGNDQEYRVQCAKMFAIILHMMHGTPYIFNGEEIGMTNCPVKNI DEVEDIESINMYNERLAEGYD  
EEELIHA INVKGRDNARRPMQWNDEKNAGFSEVDPWLSVNP NYKDINVENALADPNSIFYTYQKL  
IKLRHENPIVVDGDFSLVSN TQDAVLAYYRILNDKKWL VVANLSNEEQNFVSNDQIETILSNYPE  
RNNVQNI TLKPYEAFISKVIELEHHHHHH

>4DMUB

APDCSQPLDVILLLDGSSSFPASYFDEMKSFAKAFISKANIGPRLTQVSVLQYGSITTTIDVPWNV  
VPEKAHLLSLVDVMQREGGPSQIGDALGFAVRYLTSEM HGARPGASKAVVILVTDVSVDSVDAAA  
DAARSNRVTVPFPIGIGDRYDAAQLRILAGPAGDSNVV KLRQRIEDLPTMVTLGNSFLHKLCSG

>4DM3A

MSGADRS PNAGAAPDSAPGQA AVASAYQRFEP RAYLRNNYAPPRGDL CNPNGVGPWKL RCLAQTF  
ATGEVSGRTLIDIGSGPTVYQLLSACSHFEDITMTDFLEVN RQELGRWLQEEPGA FNWSMYSQHA  
CLIEGKGECWQDKERQLRARVKRVLPIDVHQ PQLGAGSPAPLPADALVSAFCLEAVSPDLASFQ  
RALDHITTLRPGGHLLLIGALEESWYLAGEARLTVVPVSEEEVREALVRS GYKVRDLRTYIMPA  
HLQTVDDVKGVFFAWAQKVGLEHHHHHH

>4DLFA

MGALRIDSHQHFWR YRAADYPWIGAGMGVLARDYLPDALHPLMHAQALGASIAVQARAGRDETA F  
LLELACDEARIAAVVGWEDLRAPQLAERVAEWRG TKLRGFRHQLQDEADVRAFVDDADFARGVAW  
LQANDYVYDVLVFERQLPDVQAF CARHDAHVLVDHAGK PALAEFDRDDTALARWRAALRELAAL  
PHVVCKLSGLVTEADWRRGLRASDLRHIEQCLDAALDAFGPQRLMFGSDWPVCLLAASYDEVASL  
VERWAESRLSAAERSALWGGTAARCYALPEPADARLAENLYFQ

>4DJSA

LATRAIPELTKLLNDEDQVVVNKAAMVHQLSKKEASRHAIMRSPQMVS AIVRTMQNTNDVETAR

CTAGTLHNLSSHREGLLAI FKSGGIPALVKMLGSPVDSVLFYAITTLHNL LLLHQEGAKMAVRLAG  
 GLQKMVALLNKTNVKFLAITTDCLQILAYGNQESKLIILASGGPQALVNIMRITYTYEKLLWTTSR  
 VLKVLVSCSSNKPAIVEAGGMQALGLHLTDPSQRLVQNC LWTLRNLSDAATKQEGMEGLLGTLVQ  
 LLGSDDINVTCAAGILSNLTCNNYKNKMMVCQVGGIEALVRTVLRAGDREDITEPAICALRHLT  
 SRHQEAEMAQNAVRLHYGLPVVVKLLHPPSHWPLIKATVGLIRNLALCPANHAPLREQGAI PRLV  
 QLLVRAHQDTQRRTSMGGTQQQFVEGVRMEEIVEGCTGALHILARDVHNRI VIRGLNTIPLFVQL  
 LYSPIENIQRVAAGVLCELAQDKEAAEAIEAEGATAPLTELHLSRNEGVATYAAAVLFRMSD  
 >4DJTA

GPGSMERRELYKICLIGDGGVGKTTYINRVLDGRFEKYNATVGAVNHPVTFLLDDQGNVIKFNV  
 WDTAGQEKKAVLKDVYYIGASGAILFFDVTSRITCQNLARWVKEFQAVVGNEAPIVVCANKIDIK  
 NRQKISKKLVMEVLKGNIEYFEISAKTAHNFLPFLHLARIFTGRPDLIFVSNVNLEPTEVNYD  
 YHSPEESKYIDYMEQASKMAPEE

>4DJBA

MGSSHHHHHSQDPMIRCLRLKVEGALEQIFTMAGLNIRDLLRDI LRRWRDENYLGMEVAGMFI  
 EEIHPEGFSLYVHLDVRAVSLLEAIVQHLTEAIISSLAVEFDHATGGERVHLIDLHFEVLNLLLE  
 >4DIXA

GPSSSKSEENISLVYEIDGTEALGSCLRVPCSNDA PDLSKCTIQWYRSSSDGSKKELISGATKS  
 VYAPEPFVGRVLHADIIDYDGHSLSLSTVGKIDPAAGLSYVEALVRKHDVDFNVVVTQMSGEDH  
 TSESIHLFHVGMRIKLCCKGKTVIAKEYYSSAMQLCGVRGGNAAAQALYWQAKKGVSVFVAFES  
 ERERNAAIMLARRFACDCNVTLAGPEDRTETGQSP

>4DIPA

YFQSMGALIPPEVKIEVLQKPFICHRKTGGDLMLVHYEGYLEKDGSLFHSTHKHNNGQPIWFT  
 LGILEALKGWDQGLKGMCVGEKRKLIIPPALGYGKEGKGI PPESTLIFNIDLLEIRNGP

>4DIQA

LRRRYTMASGPQVDNTGGEPAWDSPLRRVLAELNRI PSSRRAARLFEWLIAMPDPDFYRRLWE  
 REAVLVRRQDHTYYQGLFSTADLDSMLRNEEVQFGQHLDAARYINGRRETLNPPGRALPAAWSL  
 YQAGCSLRLLCPQAFSTTVWQFLAVLQEQFGSMAGSNVYLTPPNSQGFAPHYDDIEAFVLQLEGR  
 KLWRVYRPRAPTEELALTSSPNFSQDDLGEVPLQTVLEPGDLLYFPRGFIHQAECDGVHSLHLT  
 LSTYQRNTWGFLEAILPLAVQAAMEENVEFRRGLPRDFMDYMG AQHSDSKDPRRTAFMEKVRVL  
 VARLGHFAPVDAVADQRAKDFIHDSLPPVLTDRERALS VYGLPIRWEAGEPVNVGAQLTTETEVEH  
 MLQDGIARLVGEGGHLFLYYTVENS RVYHLEEPKCLEIYPQQADAMELLLGSYPEFVRVGDLPD  
 SVEDQLSLATTLYDKGLLLTKMPLALNAENLYFQ

>2LOYA

MLIYKDI FTDDDELSSDSFPMKLVDDLVEYFKGKHVVRKEGEIVLAGSNPSAEEGAEDDGSDEHVE  
 RGIDIVLNHKLIVEMNCYEDASMFKAYIKKFMKNVIDHMEKNNRDKADVDAFKKKIQGWVVSLLAK  
 DRFKNLAFFIGERAAEGAENGQVAII EYRDVDGTEVPTLMLVKEAIIEEKCLEHHHHHH

>2LORA

MVNLGLSRVDDAVAAKHPGLGEYAACQSHAFMKGVFTFVTGTGMAFGLQMF IQRKFPYPLQWSSL  
 VAVVAGSVVSYGVTRVESEKCNLWLFLETGQLPKDRSTDQRS

>2LONA

MSANRRWWVPDDEDCVSEKLLRKTRESPLVPIGLGGCLVVAAYRIYRLRSRGSTKMSIH LIHTR  
 VAAQACAVGAIMLGAVYTMYS DYVKRMAQDAGEK

>4DG8A

GHMDSFFRKKAI VRMSQNSLLDLYAHPTVVARFSEMAALHPHREAIRDRFGSVDYRQLLDSAEQL

SDYLLEHYPPQGVCLGVYGEYSRESITCLLAILLSGHHYLYIDLKQPAAWNAELCRQVDCRLILD  
 CSTTPTPANGLPCVPVRHLPAAPASVARPCFAADQIAYINFSSGTTGRPKAIACHTHAGITRCLG  
 QSFLAFAPQMRFLVNSPLSFDAAATLEIWGALLNGGCCVLNDLGPLDPGVLRQLIGERGADSAWLT  
 ASLFNTLVLDLDPCLGGLRQLLTGGDILSVPHVRRALLRHPRLHLVNGYGPTENTTFTCCHVVD  
 DDLEEDDIPIGKAIAGTAVLLLDEHGQEIAEPDRAGEIVAFGAGLAQGYRNDAAARTRASFVELPY  
 RGRLLRAYRTGDRARYDEQGRLRFI GRGDGQVKLNGYRLDLPALQRFRRQPGIILDCALLVRERN  
 GVKQLLCAWTGKADASPQALLRQLPTWQRPHACVRVEALPLTAHGKLDRAALLRRLEEPLERCAS  
 ALDPDQRGCAQLWSELLGCEVGAADQDFFLCGNSLLALQLVALCQSAGAGANLGLADLQANSRL  
 DQFSRLLRSHGLAPERLLERAATPEQPLVLSRSAA

>2LOEA

EKVKGCDFTTSESTIFSKGYSINEISNKSSNNQQDIVCTVKAHANDLIGFKCPSNYSVEPHDCFV  
 SAFNLSGKNENLENKLLTNIIMDHYNNTFYSLPSLISDNWKFVCVSKDNEKKLVFTVEA

>4DEPB

EPLADKCKEREKIIILVSSANEIDVRPCPLNPNHEHKGTTITWYKDDSKTPVSTEQASRIHQHKEK  
 LWFVPAKVEDSGHYCVVRNSSYCLRIKISAKFVENEPNLCYNAQAIKQKLPVAGDGLVCPYM  
 EFFKNENNELPKLQWYKDCPKLLLDNIHFSGVKDRLIVMNVAEKHRGNYTCHASYTYLQKQYPIT  
 RVIEFITLEENKPTRPVIIVSPANETMEVDLGSQIQLICNVGTGQLSDIAYWKWNGSVI DEDDPVLG  
 EDYYSVENPANKRRSTLITVLNISEIESRFYKHPFTCFAKNTHGIDAAYIQLIYPVTNFQK

>2LOBA

HHHHHHHHHSSGHIEGRHMENLYFQGIRKVLLLKEDHEGLGISITGGKEHGVPILISEIHPGQP  
 ADCGGLHVGDAI LAVNGVNLRDTKHKEAVTILSQQRGEIEFEVVYV

>4AFIA

GSPFYIKSSPSPQKRYQDTPGVEHIPVVQIDLSVPLKVPGLPMSDQYVKLEEAMAILFAVVARGT  
 TILAKHAWCGGNFLEVTEQILAKIPSENNKLTYSHGNYLFHYICQDRIVYLCITDDDFERSRAFS  
 FLNEVKKRFQTTYGSRAQTALPYAMNSEFSSVLAAQLKHSEN

>4DCNC

GSRTVDLELELQIEELLRETKRKYESVLQGLRALTAHLYSLLQTQHALGDAFADLSQKSPELQEEF  
 GYNAETQKLLCKNGETLLGAVNFFVSSINTLVTKTMDTLMTVKQYEAARLEYDAYRTDLEELSL  
 GPRDAGTRGRLESAQATFQAHRDKYEKLRGDVAIKLKFLEENKIKVMHKQLLLFHNAVSAYFAGN  
 QKQ

>3VO1A

MVSTTETAEAEPVKKLEKVSKKQEEGLVTNKYKPKPEPYVGRCLLNTRITGDQAPGETWHMVFSTE  
 GEVPYREGQSIGVIADGEDKNGKPKHLRLYSIASSALGDFGDSKTVSLCVKRLVYTNDQGEVVKG  
 VCSNFLCDLPGAEVKITGPGVKEMLMPKDPNATIIMLATGTGIAPFRSFLWKMFEEHEDYKYT  
 GLAWLFLGVPTS DTLTYKEELEKMKEMAPDNFRLDFAVSREQTNAAGEKMYIQTRMAEYKEELWE  
 LLKKDNTYVVMCGLKGMKGI DDI MLDLAAKDGINWLDYKKQLKKSEQWNVEVY

>4DCXA

AAPDEITTAWPVNVGPLNPHLYTPNQMFQSMVYEPVVKYQADGSVIPWLAKSWTHSEDKTWTWF  
 TLRDDVKFSNGEPFDAEAAAENFRAVL DNRQRHAWLELANQIVDKALSKTELQITLKSAYYPFL  
 QELALPRPFRFIAPSQFKNHETMNGIKAPIGTGPWILQESKLNQYDVFVRNENYWGKPAIKKIT  
 FNVIPDPTTRAVAFETGDI D LLYGNEGLLPLDTFARFSONPAYHTQLSQPIETVMLALNTAKAPT  
 NELAVREALNYAVNKKSLIDNALYGTQQVADTLFAPSVPYANLGLKPSQYDPQKAKALLEKAGWT  
 LPAGKDIREKNGQPLRIELSFIGTDALSKSMAEIIQADMQRIGADVSLIGEEESSIYARQRDGRF  
 GMI FHRTWGAPYDPHAFLLSSMRVPSHADFQAQQGLADKPLIDKEIGEVLATHDETQRQALYRDIL

TRLHDEAVYLPISYISMMVVSKPELGNIPYAPIATEIPFEQIKPVKP

>4DCKC

MALLRKSYSQPQLKGIIVTKLYSRQGYHLQLQADGTIDGTKDEDSTYTLFNLIIPVGLRVVAIQGVQ  
TKLYLAMNSEGYLYTSELFTPECKFKESVFENYVVTYSSMIYRQQQSGRGWYLGLENKEGEIMKGN  
HVKKNKPAAHFLPKPLKVAMYKEPSLHDLTEFSRSGSGTPTKRSRVSGLVNGGKSMHNEST

>4DBLC

MSIVMQLQDVAESTRLGPLSGEVRAGEILHLVGPNGAGKSTLLARMAGMTSGKGSIQFAGQPLEA  
WSATKLALHRAVLSQQQTPPFATPVWHYLTLHQHDKTRTELLNDVAGALALDDKLGRSTNQLSGG  
EWQVRVRLAAVVLQITPQANPAGQLLLLDQPMNSLDVAQQSALDKILSALSQQGLAIVMSSHDLNH  
TLRHAHRAWLLKGGKMLASGRREEVLTTPNLAQAYGMNFRRLDIEGHRMLISTI

>4D97A

MGRSHHHHHHGMASMLPHHLTRFPRLEFIGAPTPLYLPRLSDYLGREIYIKRDDVTPIAMGGNK  
LRKLEFLVADALREGADTLITAGAIQSNHVRQTAAVAAGLGLHCVALLENPIGTTAENYLTNGNR  
LLLDLFTQIEMCDALTDPAQLQTLATRIEAQGFPRYVIVPVGSSALGAMGYVESALEIAQQCE  
EVLVGLSSVVVASGSAGTHAGLAVGLEHLMPDVELIGVTVSRVSAEQKPKVIALQQAIAGQLALTA  
TADIHLWDDYFAPGYGVPNDAGMEAVKLLASLEGLVLLDPVYTGKAMAGLIDGISQKRFNDDGPIL  
FIHTGGAPALFAYHPHVTYPE

>4D8QH

MSLRLPQPNAGLQKQGYNSYSNADGQIIKSIAAIRELHQMCLTSMGPCGRNKIIVNHLGKIIIT  
NDAATMLRELDIVHPAVKVLVMATEQQKIDMGDGTNLVMI LAGELLNSEKLI SMGLSAVEIIQG  
YNMARKFTLKELDVVEITDKNDKNELLKMIKPVISSKKGSEDI LSELVSEAVSHVLPVAQQ  
AGEIPYFNVDSIRVVKIMGGSLSNSTVIKGMVFNREPEGHVKSLSSEDKKHVAVFTCPDIANTE  
TKGTVLLHNAQEMLDKFSKGEKQIDAMMKEIADMGVECI VAGAGV GELALHYLNRYGILVLKVP  
KFELRRLCRVCGATPLPRLGAPTPEELGLVETVKTMEIGGDRVTVFKQEQQEISRTSTIILRGAT  
QNNLDDIERAIDDGVA AVKGLMKPSGGKLLPGAGATEIELISRITKYGERTPGLLQLAIKQFAVA  
FEVVPRTLAETAGLDVNEVLPNLYAAHNVTEPGAVKTDHLYKGV DIDGESDEGVKDIREENIYDM  
LATKKFAINVATEAATTVLSIDQI IMAKKAGGPRAQQGPRPGNWDQED

>4D87A

MSNKYRVRKNVLHLLTDTEKRDFVRTVLILKEKGIYDRYIAWHGAAGKFHTPPGSDRNAAHMSSAF  
LPWHREYLLRFERDLQSINPEVTLPYWEWETDAQMQDPSQSQIWSADFMGGNGNPIKDFIVDTGP  
FAAGRWTIDEQGNPSGGLKRNFGATKEAPTLPTRDDVLNALKITQYDTPPDMTSQNSFRNQL  
GFINGPQLHNRVHRWVGGMGVVPTAPNDPVFFLHHANVDRIWAVWQIIHRNQNYQPMKNGPFGQ  
NFRDPMYPWNTTPEDVMNHRKLG YVYDIELRKS KRSSHHHHHH

>4D8KA

GGSNPPASPLQDNLVIALHSYEPSHGDGLGFEKGEQLRILEQSGEWWKAQSLTTGQEGFIPFNFV  
AKANSLEPEPWFFKNLSRKDAERQLLAPGNTHGSFLIRESESTAGSFSLSVRDFDQNGEVVKHY  
KIRNLNNGGFYISPRITFPGLHELVRHYTNASDGLCTRLSRPCQT

>3VF0B

HMLDPEEIRKRLEHTERQFRNRRKILIRGLPGDVTNQEVHDLLSDYELKYCFVDKYKGTAFVTL  
NGEQAEAAINAFHQSRRLRERELSVQLQPTDALLCVANLPPSLTQQQFEELVRPFGSLERCFLVYS  
ERTGQSKGYGFAEYMKKDSAARAKSDLLGKPLGPRTLYVHWT DAGQLTPALLHSRCLCVDRLPPG  
FNDVDALCRALS AVHSPTFCQLACGQDQGLKGFVAVLEYETAEMAEAAQQQADGLSLGGSHLRVSF  
CAPGPPGRSMLAALIAAQATALNRG

>3VFDA



ESGAVPKRKDPLTHTSNSLPRSKTVMKTGSAGLSGHHRAPSYSGLSMVSQSGVPAPTTTHKGT  
 PKTNRNTNKPSTPTTATRKKKDLKNFRNVDSNLANLIMNEIVDNGTAVKFDDIAGQDLAKQALQEI  
 VILPSLRPELFTGLRAPARGLLFGPPGNGKMLAKAVAAESNATFFNISAASTSKYVGEKEKL  
 VRALFAVARELQPSIIFIDQVDSLCCERREGEHDASRRLKTEFLIEFDGVQSAGDDRVLVMGATN  
 RPQELDEAVLRRFIKRVYVSLPNEETRLLLLKNLLCKQGSPLTQKELAQRLARMTDGYSGDLTAL  
 AKDAALGPIRELKPEQVKNMSASEMRNIRLSDFTESLKKIKRSVSPQTLQLEAYIRWNKDFGDTTV  
 >2L00A

SVDVAVSAGAGERASAEQKESYEPKPAVGPSPGESVVATEAFWDDLQGFLEQRLKDYDEANKLRV  
 LFKEAWRSSF

>3VE0I

YPYDVPDYAIEGRGARSMPPLGVVTNSTLEVTEIDQLVCKDHLASTDQLKSVGLNLEGSGVSTDIP  
 SATKRWGFRRSGVPPKVVSYEAGEWAENCYNLEIKKPDGSECLPPPPDGVRGFPRCRYVHKAQGTG  
 PCPGDYAFHKDGAFFLYDRLASTVIYRGNVFAEGVIAFLILAKPKETFLQSPPIREAVNYTENTS  
 SYYATSYLEYEIENFGAQHSTTLFKINNNTFVLLDRPHTPQFLFQLNDTIHLHQQLSNTTGKLIW  
 TLDANINADIGEWAFWENKKNLSEQLRGEELSFETLSL

>4AE2A

ETGHHHHHSADEPMDFKINTDEIMTSLKSVNGQIESLISPDSRKNPARNCRDLKFCHPELKSG  
 EYWVDPNQCKLDAIKVFCNMETGETCISANPLNVPRKHWWTDSSAEKXHVWFGESMDGGFQFSY  
 GNPPELPELVLDVQLAFLRLLSSRASQQITYHCKNSIAYMDQASGNVKKALKLMGSNEGEFKAEGN  
 SKFTYTVLEDGCTKHTGEWSKTVFEYRTRKAVRLPIVDIAPYDIGGPDQEFQVGVGPFVCL

>3VDIA

MALFGTKDTTTHASDYEIIILEGGSSSWGQIKGRAKVVNPAALPLLPADCNIKIEAKPLDAQKGVV  
 RFTSQIESIVDSTKNKLVVEVDIANETKDRRIAVGEGEVSVGDFSHKFSFEQSVVNMYYYYRSDAV  
 RRNVNPNVYMQRQFHDIMMKVPLDNKDLIETWEGFQQSISGGGVNFGDWIREFWFIGPAYTAIN  
 EGGQRISPIQVNNFVGVESGEKGPVGVSRWKFVSHAGSGIVDSISRWAELFPVEQLNKPASIEGGFR  
 SDSQGIQVVDGNLPGVSRDAGGLRRILNHPLIPLVHHGMVGVKFNDFTVDTQLKVVLPKGYKIR  
 YAAPQFRSQNLEEYRWSGGAYARWVEHVCKGGTGQFEVLYAQ

>3VDJA

YVEFEPKDKHIKEYLNKIQNSLSTEWSPCSVTCNGIQVRIKPGSANKPKDELQYANDIEKKICK  
 MEKCPHHHHHHA

>4ADZA

GSHMTTTEAGASAPPAVDGAVNQATARQAEADGTDIVTDHDRGVHGYHKQKAHLKRLRRIEQI  
 RGLQRMVDEDEVYCIDILTQVSASTKALQSFALQLLEEHLRHCVADAALKGGTEIDAKVEEATKAI  
 GRLLRT

>3VBAA

MRSIIKGRVWKFVNVDTDAILPARYLVYTKPEELAQFVMTGADPDFPKKVKPGDIIVGGKNFGC  
 GSSREHAPLGLKAGISCVIAESFARIFYRNAINVGLPLIECKGISEKVNQEGDELEVNLETGEIK  
 NLTTGEVLKQKLPFMMEILEAGGLMPYLKKKMAESQLEHHHHHH

>3V90A

GPGSMTGTTMFAALLHPRLADCRRLYLRNHEVYMNIGAFEHEKRGQRVVINVDLQVPLALTPV  
 EDKLRVVDYDLKQSVAVQCVARGHIHLQETLCAIAASLLAHDAVRAVRVSTKPDAYPDCDAV  
 GVEVFRIKDEERA

>3V9BA

I PRFGVKTEQEDVLAKLELDVKNWGLHVFRIAEELSGNRPLTVIMHTIFQERDLLKTFKI PVDTLI

TYLMTLEDHYHADVAYHNNIHAADVQSTHVLLSTPALEAVFTDLEILAAIFASAIHDVDHPGVS  
 NQFLINTNSELALMYNDSSVLENHHLAVGFKLLQEENCDIFQNLTKKQRQSLRKMVIDIVLATDM  
 SKHMNLLADLKTMTVETKKVTSSGVLLLDNYSDRIQVLQNMVHCADLSNPTKPLQLYRQWTRIME  
 EFFRQGDREERERGMESISPMCDKHNASVEKSQVGFIDYIVHPLWETWADLVHPDAQDILDLTLEDNR  
 EWYQSTIPQSPSPAPDDPEEGRQGQTEKFQFELTL

>2LNAA

MGHHHHHSHMKRSGREITWKDFVNNYLSKGVVDRLEVVNKRFRVVRTFTPGKTPVDGQYVWFNIG  
 SVDTFERNLETLOQELGIEGENRVPVVYIAESDG

>3V65B

TGEENCNVNNGGCAQKCQMIIRGAVQCTCHTGYRLTEDGRTCQDVNECAEEGYCSQGCTNSEGAFQ  
 CWCEAGYELRPDRRSCKALGPEPVLLFANRIDIRQVLPHRSEYTLNLENAIALDFHHRRELV  
 FWSDVTLDRILRANLNGSNVEEVVSTGLESPGGLAVDWVHDKLYWTDSGTSRIEVANLDGAHRKV  
 LLWQSLEKPRIALHPMEGTIYWTDWGNTPRIEASSMDGSGRRIADTHLFWPNGLTIDYAGRMM  
 YWVDAKHHVIERANLDGSHRKAVISQGLPHFPAITVFEDSLYWTDWHTKSINSANKFTGKNQEI  
 RNKLFHPMDIHTLHPQRQPAGKNRCGDNNGGCTHLCLPSGQNYTCACPTGFRKINSHACAQ

>3V53A

MGHHHHHMKRKHISLIEKIPTAKPELFAYPLDWSIVDSILMERRIRPWINKKIEYIGEEEEAT  
 LVDFVCSKVMASHPQSILDDVAMVLDEEAIEVIVKMWRLLIYETEAKKIGLVK

>3V57B

MLDAFSRVVNSDAKAAAYVGGSDLQALKSFIADGNKRLDAVNSIVSNASCMVSDAVSGMICENPG  
 LISPGNCYTNRRMAACLDRGEIILRYVSYALLAGDASVLEDRCLNGLKETYIALGVPTNSSIRA  
 VSIMKAQAVAFITNTATERKMSFAAGDCTSLASEVASYFDRVGAAIS

>3V43A

HMEPIPICSFCLGTKEQNREKKPEELISCADCGNSGHPSCCLKFSPELTVRVKALRWQCIECKTCS  
 SCRQDQGNADNMLFCDSCDRGFHMCCDPPLTRMPKGMWICQICRPR

>4AC5C

CFEPPPATTTQTGFRGLSMGEVLHPATVKAKKERDAQYPPALAAVKAEGPPVSQVYKNVKVLGNL  
 TEAEFLRTMTAITEWVSPQEGCTYCHDENNLASEAKYPYVVARMLMTRAINNTQHVQQTGV  
 TCYTCHRGTPLPPYVRYLEPTLPLNNRETPTHVERVETRSGYVVRLAKYTAYSALNYDPFTMFLA  
 NDKRQVRVVPQTALPLVGVSARGKERRPLSDAYATFALMMSISDSLGTNCTFCHNAQTFESWGKKS  
 TPQRAIAWWGIRMVRDLNMNYLAPLNASLPASRLGRQGEAPQADCRTCHQGVTKPLFGASRLKDY  
 PELGPIKAAAK

>3V48A

GHMKLSLSPPPYADAPVVVLIISGLGGSGSYWLPQLAVLEQEQVVCYDQRGTGNNPDTLAEDYSI  
 AQMAAELHQALVAAGIEHYAVVGHALGALVGMQLALDYPASVTVLI SVNGWLRINAHTRRCFQVR  
 ERLLYSGGAQAWVEAQPLFLYPADWMAARAPRLEAEDALALAHFQGNLLRRLNALKRADFSSH  
 ADIRICPVQIICASDILLVPTACSELHAALPDSQKMVMPIYGGHACNVTDPETFNALLNGLASL  
 LHHREAAAL

>3V2AR

MQSKVLLAVALWLCVETRAASVGLPSVSLDLPRLSIQKDILTIIKANTTLQITCRGQRDLWLWPN  
 NQSGSEQRVEVTECS DGLFCKTLTIPKVI GNDTGAYKCFYRETDLASVIYVYVQDYRSPFIASVS  
 DQHGVVYITENKNKT VVIPCLGSI SNLNVSLCARYPEKRFVPDGNRISWDSKKGFTIPSYMISYA  
 GVMFCEAKINDESYQSIMYIVVVVGYRIYDVVLSPSHGIELSVGEKLVLNCTARTELVGIDFNW  
 EYPSKHKHQHKKLVNRDLKTQSGSEMKKFLSTLTIDGVTRSDQGLYTCAASSGLMTKKNSTFVRVH

EKPFVAFGSGMESLVEATVGERVRIPAKYLGYPPEIKWYKNGIPLESNHTIKAGHVLTIMEVSE  
 RDTGNYTVILTNPISKEKQSHVVSLVVYVPPQIGEKSLISPVDSYQYGTQTTLTCTVYAI PPPHH  
 IHWYWQLEEECANEPSQAVSVTNYPYCEEWRVSVDFQGGNKIEVNKNQFALIEGKNKTVSTLVIQ  
 AANVSALYKCEAVNKVGRGERVISFHVTRGPEITLQPDMPTEQESVSLWCTADRSTFENLTWYK  
 LGPQPLPIHVGE LPTPVCKNLDLWKLNATMFSNSTNDILIMELKNASLQDQGDYVCLAQDRKTK  
 KRHCVVRQLTVLERVAPTITGNLENQTTSIGESIEVSCTASGNPPPQIMWFKDNETLVEDSGIVL  
 KDGNRNLTIRVRKEDEGLYTCQACSVLGC AKVEAFFIIEGAQEKTNLERTHHHHHH

>3J16C

MKLNISYPVNGSQKTFEIDDEHRIRVFFDKRIGQEV DGEAVGDEFKGYVFKISGGNDKQGFPMKQ  
 GVLLPTRIKLLLLTKNVSCYRPRRDGERKRKSVRGAI VGPDLAVLALVIVKKGQELEGLTDTTVP  
 KRLGPKRANNIRKFFGLSKEDDVRDFVIRREVTKGEKTYTKAPKIQRLVTPQRLQRKRHRALKV  
 RNAQAQREAAA EYAQLLAKRLSERKA EKA EIRKRRASSLKA

>3VMGA

MANVDEAILKRVKGWAPYVDAKLGFRNHWPVMFSKEINEGEPKTLKLLGENLLVNRIDGKLYCL  
 KDRCLHRGVQLSVKVECKTKSTITCWYHAWTYRWEDGVLCDILTNP TSAQIGRQKLTYPVQEAK  
 GCVFIYLG DGDPPPLARDTPPNFLDDMEILGNQI IKS NWRLAVENGFDPSHIYIHKDSILVKD  
 ND LALPLGFAPGGDRKQQTRVVDDD VGRKGVYDLIGEHGVPVFEGTIGGEVVREGAYGEKIVAN  
 DISIWLPGVLKVNPFNPDMMQFEWYVPI DENTHY YFQTLGKPCANDEERKKYEQEFESKWK PMA  
 LEGFNNDIWAREAMVDFYADDKGWVNEILFESDEAIVAWRKLASEHNQGIQTQAHVSGLEHHHH  
 HH

>3V33A

GGGTPKAPNLEPPLPEEEKEGSDLRPVVIDGSNVAMSHGNKEVFSCRGILLAVNWFLERGHDTIT  
 VVFP SWRKEQPRPDVPI TDQHILRELEKKILVFTPSRRVGGKRVVCYDDRFIVKLAYESDGIVV  
 SNDTYRDLQGERQEWKRFIEERLLMYSFVNDKFMPPDDPLGRHGPSLDNFLRKKPLTLEHRKQPC  
 PYGRKCTYGIKCRFFHPERPSCPQRSVA

>3V22V

MKRQKRDRLERAHQRGYQAGIAGRSKEMCPYQTLNQRSQWLGGWREAMADRVVM AHHHHHHH

>4ABRL

MVALPTINQLVRKGREKVRKKSVPALKGAPFRRGVCTVVRTVTPKKPNSALRKVAKVRLTSGYE  
 VTAYIPGEGHNLQEHSVVLIRGGRVKDLPGVRYHIVRGVYDAAGVKDRKKSRSKYGTKPKPEAAK  
 TAAK

>3VM6A

MNHKVHHHHHHIEGRHMAVVKEVLEIAEKIKNMEIRGAGKIARSAAYALQLQAEKSKATNVDEFW  
 KEMKQAAKILFETRPTAVSLPNALRYVMHRGKIAYSSGADLEQLRFVI INAAKEFIHNSEKALER  
 IGEFGAKRIEDGDVIMTHSHSKAAISVMKTAWEQGDIKVIVTETRPKWQGITAKELASYGIPV  
 IYVVDSAARHYMKMTDKVVMGADSI TVNGAVINKIGTALIALTAKEHRVWTMIAAETYKFHPETM  
 LGQLVEIEMRDPTEVIPEDELKTWPKNIEVWNPAFDVTPPEYVDVIITERGIIIPPYAAIDILREE  
 FGWALKYTEPWED

>3J0TL

MKTFTAKPETVKRDWYVVDATGKTLGRLATELARRLRGKHKA EYTPHVDTGDYIIVLNADKVAVT  
 GNKRTDKVYYHHTGHIGGIKQATFEEMIARRPERVIEIAVKGMLPKGPLGRAMFRKLVYAGNEH  
 NHAAQQPQVLDI

>3UXQD

MAVKKFKPYTPSRRFMTVADFSEITKTEPEKSLVKPLKKTGGRNNQGRITVFRFRGGGHKRLYRII

DFKRWDKVGIPAKVAAIEYDPNRSARIALLLHYVDGEKRYIIAPDGLQVGQQVAVAGPDAPIQVGNALPLRFIPVGTVVHAVELEPKKGAKLARAAGTSAQIQGREGDYVILRLPSGELRKVHGECYATVGA VGNADHKNIVLGKAGRSRWLGRRPHVRGAAMNPVDHPHGGEGRAPRGRPPASPWGWQTKGLKTR KRRKPSSRFIIARRKK

>3UX2A

SNARIMEEKALEVYDLIRTIRDPEKPNTLEEELEVSESCVEVQEINEEEYLVIIRFTPTVPHCSL ATLIGLCLRVKLQRCLPFKHKLEIYISEGTHSTEEDINKQINDKERVAAAMENPNLREIVEQCVL

>3UW8A

MAETPNSDMSGATGGRSKRPKSNQDWWPSKLNLEILDQNARDVGPVEDDFDYAEFQKLDLEAVK SDLEELMTSSQDWWPADYGHYGPLFIRMAHWSAGTYRTADGRGGAAGGRQRFAPINSWPDNANLD KARRLLLPIKQKYGQKISWADLMILAGNVAIESMGFKTFGYAGGREDAFEEDKAVNWGPEDDEFET QERFDEPGEIQEGLGASVMGLIYVNPEGPDGNPDPEASAKNIRQTFDRMAMNDKETAALIAGGHT FGKVVHGADDPEENLGPEPEAAPIEQQLGWQNKNGNSKGGEMITTGIEGPWTQSPTWDMGYINN LLDYEWEPKGGAWQWAPKSEELKNSVPAHDHPDEKQTPMMLTTDIALKRDPDYREVMETFQE NPMEFGMNFAKAWYKLTHRDMGPPERFLGPEVPDEEMIWQDPLPDADYDLIGDEEIAELKEEILD SDLSVSQLVKTAWASASTYRDSDKRGGANGARLRLEPQKNWEVNEPEQLETVLGTLENIQTEFND SRSDGTQVSLADLIVLGGNAAVEQAAANAGYDVEIPFEPGRVDAGPEHTDAPSFDAKPKVDGVR NYIQDDITRPAEEVLVDNADLLNLTASELTALIGGMRSIGANYQDIDLGVFTDEPETLTNDFFVN LLDMGTEWEPAADSEHRYKGLDRDTGEVKWEATRIDLIFGSNDRLRAISEVYGSADAEEKLVHDF VDTWSKVMKLDLRFDLHHHHHH

>3UW2A

MAHHHHHMGTTLEAQTQPGSMISQSIKAYDIRGVIKTLADADVARSIGRAFGSEVRAQGGDAV VVARDGRLSGPELVGALADGLRAAGVDVVDVGMVPTPVGYFAASVPLALSGGERRVDSCIVVTGS HNPPDYNGFKMVLRGAAIYGDQIQGLYKRIVDARFETGSGSYEQYDVADQYVERIVGDIKLRPL KLVVDAGNGVAGPLATRLFKALGCELVLFDTIDGNFPNHHPDPAHPENLQDVIKATDAEIG FAFDGDGDRLGVVTKDGOIIPDRQLMLFAEEVLSRNPQAQIIYDVKCTRNLARVWREKGGPELM WKTGHSLVKAKLRETGAPLAGEMSGHVFFKDRWYGFDDGLYTGARLLEILARVADPSALLNGLPN AVSTPELQKLEEGENVKLDKLRADAKFDGADEVVTIDGLRVEYPDGFGLARSSNTTPVVVLRFEATS DAALARIQDDFRALKAAKPGANLPF

>3UV1A

DPHIYDKITTEEINKAIDDAIAAAIEQSETIDPMKVPDHADKFERHVGILDFKGEAMRNIEARGLK QMKRQGDANVKGEEGIVKAHLLIGVHDDIVSMEYDLAYKLGDLHPTTHVIVSDIQDFVVALSLEIP DEGNITMTSFEVRQFANVVNHIGGLSILDPIFGVLSVDVLTAFQDTRKEMTKVLAPAFKRELEKN

>4A9WA

MDSVDVVVIGGGQSGLSAGYFLRRSGLSYVILDAEASPGGAWQHAWHSLHLFSPAGWSSIPGWPM PASQGPYPARAEVLAYLAQYEQKYALPVLRPVIRVQVSHFGERLRVVARDDGRQWLARAVISATGT WGEAYTPEYQGLSFAGIQLHSAHYSTPAPFAGMRVAIIGGGNSGAQILAEVSTVAETTWITQHE PAFLADDVDGRVLFERATERWKAQQEGREPDLPPGGFGDIVMPPVLDARARGVLAAPPPARFS PTGMQWADGTERAFDAVIWCTGFRPALSHLKLGLDLVTPQGQVEVDGSGLRALAVPSVWLLGYGDW NGMASATLIGVTRYAREAVRQVTAYCADHQDR

>3UV2A

SMQCQSTEDAMTVLTPLETKDYEGLKRVLRSLQAHKMAWPFLEPVDPNADPDYYGVIKEPMDLAT MEERVQRRYYEKLTEFVADMTKIFDNCRYNPSDSPFFYQCAEVLESFFVQKLGFKASRSH

>3UUMA

DMDLDSYQIALEEVLTWLLSAEDTFQEQQDDISDDVEDVKEQFATHETFMMELSAHQSSVGSVLQA  
GNQLMTQGTLSDEEEFEIQEQMTLLNARWEALRVESMERQSRLHDALMELQKKQLQQL

>3UTNX

MGSSHHHHHSSGLVPRGSHMASMPLFDLISPFAFVKLVASEKVHRIVPVDATWYLPVSWKLDNKV  
DFLTKPRIPNSIFFDIDAISDKKSPYPHMFPTKKVFDDAMSNLGVQKDDILVVYDRVGNFSSPRC  
AWTLGVMGHPKVYLLNNFNQYREFKYPLDSSKVAAFSPYPKSHYESSESFQDKEIVDYEMFQLV  
KSGELAKKFNAFDARSLGRFEGTEPEPRSDIPSGHIPGTQPLPYGSLDPETKTYPEAGEAIHAT  
LEKALKDFHCTLDPSKPTICSCGTGVSGVIIKTALELAGVPNVRLYDGSWTEWVLKSGPEWIAEN  
RD

>4A9AA

MHHHHHMHSTTVEKIKAIEDEMARTQKNKATSFHLGQLKAKLAKLRRELLTSASSGSGGGAGIGF  
DVARTGVASVGFVGFPSVGKSTLLSKLTGTESEAAEYEFVTLVTPGVIRYKGAQIQLMLDLPGII  
DGAKDGRGRGKQVIIVARTCNLLFIIIDVNVKPLHKKQIIIEKELEGVGIRLNKTPPDILIKKKEKG  
GISITNTVPLTHLGNDEIRAVMSEYRINSAEIAFRCDATVDDLIDVLEASSRRYMPAIYVLNKID  
SLSIEELELLYRIPNAVPISSGQDWNLDLQVMMWDRNLNVRIYTKPKGQIPDFVLPVLRSDRC  
SVKDFCNQIHKSLVDDFRNALVYGSSVKHQYVGLSHILEDEDEVVTILKK

>4A91A

MTDTQYIGRFAPSPSGELHFGSLIAALGSYLQARARQGRWLVRIEDIDPPREVPGAAETILRQLE  
HYGLHWDGDVLWQSQRHDAYREALAWLHEQGLSYYCTCTRARIQSIGGIYDGHCRVLHHGPDNAA  
VRIRQQHPVTQFTDQLRGI IHADEKLAREDFI IHRRDGLFAYNLAVVDDHFGQVTEIVRGADLI  
EPTVRQISLYQLFGWKVPDYIHLPLALNPQGAKLSKQNHAPALPKGDPRPVLIAALQFLGQQAEA  
HWQDFSVEQILQSAVKNWRLTAVPESAIVNSTFSNASC

>3UR1C

SQIGETLENIRSIKLIQNMRIARETNILALNATIEAARAGEAGKGFMIIVANEVQNLSNETNEV  
TKQIVEKAREILESSQRSLE

>4A8JC

MHHHHHMHGMSVQRQDLVLFSDQSVLPAHFFQDSNSHNLFIFITHQSCTQPLWMINALVETHVLGSP  
SSLNESSSSMLPSSSTRSHAVLASFIEHQNYFTNSLNKIKIPSNYNVLDFLSDFIVNNIHNKPRD  
KILSDVLAKFSAAIQNNPTDTIVIEQPELLLSLVSGLTCELNKFITPLLRQCKVLIIVSNSD  
IFNIDEYDASVHSSNLQNFYKSSFIKSMINLNLNPLKTGFAKDVTGSLHVCRRGAPIATSNTSLH  
VVENEYLYLNEKESTKLFYR

>3UR1B

KEFEVLSFEIDEQALAFDVDNIEMVIEKSDITPVPKSRHFVEGVINLRGRIIPVNLAKILGISF  
DEQKMKSIIVARTKDVEVGFVDRVLGVLRTITENQLDLTNVSDKFGKSKGLVKTDGRLIIYLDI  
DKIIIEEITV

>4A8JB

MASSSHNPVILLKRILSLTESSPFILCLDSIAQTSYKLIQEFVHQSKSKGNEYPIVYISFETVNK  
PSYCTQFIDATQMDFVHLVKQIISYLPAAATATQAKKHMVIDSLNYISTEYITRFLSEIASPHCT  
MVATYHKDIKDENRTVIPDWNNNYPDKLTLQFMATTIVDIDVVLGTGLDTEEVSSELLNEFRIPR  
GLNNDIFQLRLVNRKRSGRSLEYDFIVNSNTHEYELLSTTKQEESSSNGLETPEMLQGLTTFNL  
GTSNKQKLAK

>3UPIA

SMSYTWGALITPCAAEESKLPINPLSNLLRHHNMVYATTSRASLRQKKVTFDRLQVLDDHYR

DVLKEMKAKASTVKAKLLSIEEACKLTPPHSAKSKFGYGAKDVRNLSSRAVNHIRSVWEDLLEDT  
 ETPIDTTIMAKSEVFCVQPEKGGRRKPARLIVFPDLGVRVCEKMALYDVVSTLPOAVMGSSYGFQY  
 SPKQRVEFLVNTWKSCKCPMGFSYDTRCFDSTVTESDIRVEESIYQCCDLAPEARQAIRSLTERL  
 YIGGPLTNSKGNCGYRRCRASGVLTSTCGNTLTTCYLKATAACRAAKLQDCTMLVNGDDLVICE  
 SAGTQEDAAALRAFTEAMTRYSAPPDPPQPEYDLELITSCSSNVSVAHNASGKRVIYLRDPTT  
 PLARAAWETARHTPINSWLGNIIMYAPTLWARMILMTHFFSILLAQEQLGKALDCQIYGACYSIE  
 PLDLPQI IERLHGLSAFTLHSYSPGEINRVASCLRKLGVPPLRTRWRHRARSVRAKLLSQGGRAAI  
 CGRYLFNWAVRTKLKLTPIPAASQLDLSGWFVAGYSGGDIYHSLSRARPENLYFQGLEHHHHHH  
 >3UOQG

MPRRRVIGQRKILPDPKFGSELLAKFVNILMVDGKKSTAESIVYSALETLAQRSGKSELEAFEVA  
 LENVRPTVEVKSRRVGGSTYQVPVEVRPVRNALAMRWIVEAARKRGDKSMALRLANELSDAEN  
 KGTAVKKREDVHRMAEANKAFAHYRWLSLRSFSHQAGASSKQPALGYLN  
 >3VKFA

SQKLLDDVDPLVTTNFGKIRGIKKELNNEILGPVIQFLGVPYAAPPTGEHRFQPPEPPSPWSDIRN  
 ATQFAPVCPQNIIDGRLPEVMLPVWFTNNLDVVSIVYQDQSEDCLYLNIYVPTEDVKRISKECAR  
 KPGKKICRKGDIRDSGGPKPVMVYIHGGSYMEGTGNLYDGSVLASYGNVIVITVNYRLGVLGFLS  
 TGDQAAKGNYGLLDLIQALRWTSENIGFFGGDLRITVFGSGAGGSCVNLTLTSHYSEGLFQRAI  
 AQSGTALSSWAVSFQPAKYARILATKVGCVNSDVELVECLQKKPYKELVDQDVQPARYHIAFGP  
 VIDGDVIPDDPQILMEQGEFLNYDIMLGVNQGEGLKFVENIVDSDDGVSASDFDFAVSNFVDNLY  
 GYPEGKDVLRETIFMYTDWADRHNPEPTRKTLTLLALFTDHQWVAPAVATADLHSNFGSPTYFYAF  
 YHHCQTDQVPAWADAAHGDEVVYVGLIPMIGPTELFPCNFVSKNDVMLSAVVMTYWTNFAKTGDPN  
 QPVPQDTKFIHTKPNRFEEVAWTRYSQKDQLYLHIGLKPRVKEHYRANKVNLWLELVPHLHNLND  
 >4A7FB

ELDRAQERLATALQKLEEAKEKADESERGMKVIESRAQKDEEKMEIQEIQLKEAKHIAEDADRKY  
 EEVARKLVIIESDLERAEEERAELSEGKCAELEEEELKTVTNNLKSLEAQAKEYSQKEDKYEIEIKV  
 LSDKLLK  
 >4A7KA

MYSKVFLKPHCEPEQPAALPLFQPQLVQGGRPDGYWVEAFPFRSDSSKCPNIIIGYGLGTYDMKSD  
 IQMLVNPYATTNNQSSSWTPVPLAKLDFPVAMHYADITKNGFNDVIITDQYGSSMDDIWAYGGRV  
 SWLENPGELRDNWTMRTIGHSPGMHRLKAGHFTRTDRVQVAVPIVVASSDLTTPADVIFIPTAPD  
 DPRSEQLWQRDVVGTTRHLVHEVAIVPAAETDGMERFDQIILAGRDGVDCLWYD GARWQRHLVGTG  
 LPEERGDYPYWGAGSAAVGRVGGDYAGYICSAEAFHGNTVSVYTKPAGSPTGIVRAEWTRHVLDFV  
 GPLNGKHTGSIHQVVCADIDGDGEDEFVAMMGADPPDFQRTGVWCYKLVDRTNMKFSKTKVSSV  
 SAGRIATANFHSQGSEVDIATISYSVPGYFESPNSINVFLSTGILAEERLDEEVMLRVVRAGSTR  
 FKTEMEFLDVAGKKLTLVVLPPFARLDVERNVSQKVMAGTVCWADENGKHERVPATRPFGCESM  
 IVSADYLESGEEGAILVLYKPSSTSGRPPFRSMDELVAHNLFPAYVPDSVRAMKFPWVRCADRPW  
 AHGRFKDLDFNLI GFHVNFADDSAAVLAHVQLWTAGIGVSAGFHNHVEASFCEIHACIANGTGR  
 GGMRWATVPDANFNPDSPNLEDTELIIVPDMHEHGPLWRTRPDGHPLLRMNDTIDYPWHAWLAGA  
 GNPSPOAFDVWVAFEFPGFETFSTPPPPRVLEPGRYAIRFGDPHQATASLALQKNDATDGTPLVLA  
 LDLDGGPSPQAWNISHVPGTDMYEAHAKTGLVLCARWPPVKNQRVAGTHSPAAMGLTSRWAVTK  
 NTKGQITFRLPEAPDHGPLFLSVSAIRHQQEADAIPIVIVQGDSIELSAWSLVPAN  
 >3UMFA

MGSSHHHHHHSSGLVPRGSHMTDQKLAKAKVIFVLGGPGSGKGTQCEKLVQKFHFNHLSSGDLRL  
 AEVQSGSPKGKELKAMMERGELVPLEVVLALLKEAMIKLVDKNCHFLIDGYPRELDQGIKFEKEV

CPCLCVINFDVSEEVMRKRLKRAETSNRVDDNEETIVKRFRTFNELTKPVIEHYKQQNKVITID  
ASGTVDAIFDKVNHELQKFGVK

>3ULRB

GPLGSSDLGITAIALYDYQAAGDDEISFDPPDIITNIEMIDDGWWRGVCKGRYGLFPANYVELRQ  
>2LLIA

KEAAPKCNNCSQRGHLKDCPHIICSYCGATDDHYSRHCPKAIQCSKCDEVGHYRSQCPHKWKKV  
QCTLCKSKKHSKERCPSIWRAYILVDDNEKAKPKVLPFHTIYCYNCGGKGFHGDCKEK

>4A6SA

AWKGEVLANNEAGQVTSIIYNPGDVITIVAAGWASYGPTQKWGPQGDREHPDQGLICHDAFCGAL  
VMKIGNSGTIPVNTGLFRWVAPNNVQGAITLIYNDVPGTYGNNSGSFSVNIQKQDS

>2LLFA

PRLFECSNKTGRFLATEIVDFTQDDLDENDVYLLDQIIFWIGKGANESEKEAAAEATAQEYLR  
SHPGSRDLDTPIIVVKQGFEPPTFTGWFMWDPLCWSDRKSY

>3UILA

EDPPACGSIVPRREWRALASECRERLTRPVRYVVVSHTAGSHCDTPASCAQQAQNVQSYHVRNLG  
WCDVGYNFLIGEDGLVYEGRGWNKGAHAGPTWNPISIGISFMGNMNRVPPRALRAAQNLLAC  
GVALGALRSNYEVKGRDVOPTLSPGDRLYEIIQTWSHYRA

>3UGJA

GLVPRGSHMMEILRGSPALSAFRINKLLARFQAANLQVHNIYAEYVHFADLNAPLNDSEQAQLTR  
LLQYGPALSSHTPAGKLLLVTPRPGTISPWSSKATDIAHNCGLQQVDRLERGVAYYIEASTLTAE  
QWRQVAAELHDRAMMETVFSSLTDAEKLFIIHQAPAVSSVDLLGEGRQALIDANLRLGLALAEDEI  
DYLQEAFTKLGRNPNDIELYMFAQANSEHCRHKIFNADWIIDGKQPCKSLFKMIKNTFETTPDYV  
LSAYKDAAVMEGSAVGRYFADHNTGRYDFHQEPAHILMKVETHNHPTAISPWPGAATGSGGEIR  
DEGATGRGAKPKAGLVGFSVSNLRIPGFEQPWEEDFGKPERIVTALDIMTEGPLGGAAFNNEFGR  
PALTYFRTYEEKVNSHNGEELRGYHKPIMLAGGIGNIRADHVQKGEIVVGAKLIVLGGPAMNIG  
LGGGAASSMASGQSDADLDFASVQRDNPEMERRCQEVIDRCWQLGDANPILFIHDVAGAGLSNAM  
PELVSDGGRGGKFELRDILSDEPGMSPLEIWCNESQERYVLAVAADQLPLFDELCKRERAPYAVI  
GDATTEEQHLSLHDNHFDNQPIDLPLDVLLGKTPKMTRDVQTLKAKGDALNRADIT IADAVKRVLH  
LPTVAEKTFLVTIGDRTVTGMVARDQMVGPWQVPVADCAVTTASLDSYYGEAMSIGERAPVALLD  
FAASARLAVGEALTNIAATQIGDIKRIKLSANWMAAAGHPGEDAGLYDAVKAVGEEELCPQLGLTI  
PVGKDSMSMKTRWQEGNEQREMTSPLSLVISAFARVEDVRHTLTPQLSTEDNALLLIDLKKGHNA  
LGATALAQVYRQLGDKPADVRDVAQLKGFYDAMQALVAARKLLAWHDRSDGGLLVTLAEMAFAGH  
CGVQVDIAALGDDHLAALFNEELGGVIQVRAEDRDAVEALLAQYGLADCVHYLGQALAGDRFVIT  
ANDQTVFSESRITLRVWVAETTWQMQRRLRDNPCADQEHEAKANDTDPGLNVKLSFDINEDIAAP  
YIATGARPKVAVLREQGVNSHVEMAAAFHRAGFDAIDVHMSDLLGGRIGLGNFHALVACGGFSYG  
DVLGAGEGWAKSILFNHRVRDEFETFFHRPQTLALGVCNGCQMMSNLRELIPGSELWPRFVRNHS  
DRFEARFSLVEVTQSPSLLLQGMVGSQMPIAVSHGEGRVEVRDDAHLAALLESKGLVALRYVDNFG  
KVTETYPANPNGSPNGITAVTTENGRVTIMMPHPERVFRTVANSWHPENWGEDSPWMRIFRNARK  
QLG

>3UGQA

MGSSHHHHHHSSGLVPRGSHMASATKNASSATPATMTSMVSQRQDLFMTDPLSPGSMFFLPNGAK  
IFNKLIEFMKLQKFKFGFNEVVTPLIYKKTLEKSGHWENYADDMFKVETTDEEKEEYGLKPMN  
CPGHCLIFGKKDRSYNELPLRFSDFSPLHRNEASGALSGLTRLRKFHQDDGHIFCTPSQVKSEIF  
NSLKLIDIVYKIFPFVKGGSGAESNYFINFSTRPDHFIGDLKVVNHAEQVLKEILEESGKPKWL

NPGDGAIFYGPKLDIMVTDHLRKTQVATIQLDFQLPERFDLKFQDQNSYKRPIMIHRATFGSIE  
 RFMALLIDSNEGRWPFWLNQAVIIPVNTKNVQQLDMCTALQKKLRNELEADDMEPVPLNDWHF  
 NVDDLDIRNEPVGRIKSAILKNYSYLIIVGDEEVQLQKYNIRERDNRKSFEEKLTMSQIWEKFIEL  
 EKNYK

>4A69C

GAMRQLAVIPPLYDADQQRIFINMNGLMADPMKVYKDRQVMNMWSEQEKETFREKFMQHPKNF  
 GLIASFLERKTVAECVLYYYLTCKNENYK

>4A6DA

MGSSEDQAYRLLNDYANGFMVSQVLFACELGVFDLLAEAPGPLDVAAVAAGVRASAHGTELLLD  
 ICVSLKLLKVETRGGKAFYRNTELSDDLTTVSPTSQCSMLKYMGRTSYRCWGHLDVREGRNQ  
 YLETFGVPAEELFTAIYRSEGERLQFMQALQEVWSVNGRSVLTAFDLSVFPMLCDLGGGAGALAK  
 ECMSLYPGCKITVFDIPEVVWTAKQHFSFQEEEQIDFQEGDFFKDPLPEADLYILARVLHDWADG  
 KCSHLLERIYHTCKPGGILVIESLLEDDRGLPLLTQLYSLNMLVQTEGQERTPTHYHMLLSSAG  
 FRDFQFKKTGAIYDAILARKGTHHHHHH

>3UEZE

GSHMEEVSEYCSHMIGSGHLQSLQRLIDSQMETSCQITFEFVDQEQKDPVCYLKKAFLLVQDIM  
 EDTMRFRDNTPNIAIAIVQLQELSLRLKSCFTKDYEEHDKACVRTFYETPLQLLEKVKNVFNETKN  
 LLDKDOWNIFSKNCNNSFAECSSQ

>4A5VA

SSEPAKLDLSCVHSDNKGSRAPTIGEVPDVSLEQCAAQCKAVDGCTHFTYNDSSKMCHVKEGKP  
 DLYDLTGKGTASRSCDRSCFEQHVSIEGAPDVMAMVTSQSADCQAACAADPSCEIFTYNEHDQK  
 CTFKGRGFSAFKERGVLGVTSGPKQFCDEGG

>3UBBA

ERAGPVTWMMIACVVVFIAMQILGDQEVMLWLAWPFDPPTLKFEFWRYFTHALMHFSLMHILFNL  
 LWWWYLGGAWEKRLGSGKLIVITLISALLSGYVQKFSGPWFGLSGVVYALMGYVWLRGERDPQ  
 SGIYLQRGLIIFALIWIWAGWFDLFGMSMANGAHIAGLAVGLAMAFVDSLNA

>3UBRA

SDKTEPRNEVYKDKFKNQYNSWHDTAKSEELVDALEQDPNMVILWAGYAFKDYKAPRGHMYAVT  
 DVRNTLRTGAPKNAEDGPLPMACWSCKSPDVPRLIEEQGEDGYFKGKWAKGGPEVTNTIGCSDCH  
 EKGSPKLRISRPYVDRALDAIGTPFSKASKQDKESMVCAQCHVEYYFEKKEDKKGFVKFPWDMGV  
 TVDQMEVYYDGIIEFSDWTHALSKTPLKAQHPEYETWKMGIHGKNNVSCVDCHMPKVTSPGKGF  
 TDHKVGNPFDRFEETCATCHSQTKEFLVGVVTNERKAKVKEMKLAEEQLVKAHFEEAAKAWELGAT  
 EAEMKPIITDIRHAQWRWDLAIAISHGVAHAPEEALRVLGTSVNKAADARVKLAQLLAKKGLTDP  
 VAIPDISTKAKAQAVLGMDEKMNAAEKEAFKKDMLPKWDAAEKKREAY

>4A53A

GAMGMSVADFYGSNVEVLLNNDKARGVITNFDSSNSILQLRLANDSTKSIVTKDIKDLRILPKN  
 EIMPKNGTKSPSTNSTKLKSAETYSSKNKWSMDCDEEFDFANLEKFDKKQVFAEFREKD

>3UA0A

MGHHHHHMRVKTFFVILCCALQYVAYTNANINDFDEDYFGSDVTVQSSNTTDEIIRDASGAVIEE  
 QITTKMQRKNKNHGILGKNEKMIKTFVITDSDGNESIVEEDVLMKTLSDGTVAQSYVAADAGA  
 YSQS

>3U9GA

GPLGMADPGVCCFITKILCAHGGRTLEELLGEIRLPEAQLYELLETAGPDRFVLETTGGQAGIT  
 RSVVATTRARVCRKRYCQRPCDSLHLCKLNLGRCHYAQSQRNLCKYSHDVLSEQNFQILKNHEL



SGLNQEELACLLVQSDPFFLPEICKSYKGEGRKQTCGQPQPCERLHICEHFTRGNCSYLNCLRSH  
 NLMDRKVLTIMREHGLSPDVVQNIQDICNNKHAR

>3U88C

SMSRSLQRIHAEIKNSLKI DNLDVNRCEALDELASLQVTMQQAQKHEMITTLLKKIRRFKVSQV  
 IMEKSTMLYNKFKNMFLVGEEDSV

>3U6WA

GAMTTSESPDAYTESFGAHTIVKPA GPPRVGQPSWNPQRASSMPVNRYPFAEEVEPIRLRNRTW  
 PDRVIDRAPLWCAVDLRDGNQALIDPMS PARKRRMFDLLVRMGYKEIEVGFPSASQTD FDFVREI  
 IEQGAIPDDVTIQVLTQCRPELIERTFQACSGAPRAIVHFYNSTSI LQRRVVFRANRAEVQAIAT  
 DGARKCQEQA AKYPGTQWRFEYSPE SYTGTELEYAKQVCD AVGEVIAPT PERPIIFNL PATVEMT  
 TPNVYADSI EWMSRNLANRESVILSLPHNDRGTAVAAAELGFAAGADRIEGCLFGNGERTGNVC  
 LVTGLGNLFSRGVDPQIDFSNIDEIRRTVEYCNQLPVHERHPYGGDLVYTA FSGSHQDAINKGLD  
 AMKLDADAADC DVDDMLWQVPYLPIDPRDVGRTYEAV

>3U43A

MELKHSISDYTEAEFLEFVKKICRAEGATEEDDNKLVREFERLTEHPDGSDLIYYPRDDREDSPE  
 GIVKEIKEWRAANGKSGFKQGLEHHHHHH

>3VIQB

MEKSQLESRVHLLLEQQKEQLESSLQDALAKLKNRDAKQTVQKHIDLLHTYNEIRDIALGMIGKVA  
 EHEKCTSVELFDRFGVNGSE

>3U3EA

MVLSEGEWQLVLHVWAKVEADVAGHGQDILIRLFKSHPETLEKFD RFKHLKTEAEMKASEDLKKH  
 GVTVLTA LGAILKKKGHHEAELKPLAQSHATKHKIPIKYLEFISEAIIHVLHSRHPGDFGADAQG  
 AMNKALELFRKDIAAKYKELGYQG

>3U2GA

MGTYEIRGQVASGFGDQSWDASSFAGFYDIDDNVSTETLTVSDLDGNVIPEGGLVYTTTTIADVD  
 FEYYNPDAGWDQYPVMGFFAE EYIPINPKADKIAKLVLDSDDKYTIRTGEMLDLGE GYAIEAKQ  
 VDVDGEK VWLEFTKDGEFVDDEIISVSTADDEANTWDVVELDDIEDEDDVVVLKVHV NQVFQGAVD  
 SIAQIEGLWLIDYANAMTIESDDEFGNLD DVSIDGDTLKI SNEDTFTLTRDSEEEIGEGMYFMIA  
 DTSSSDLRYYPYVEKTIGLEHHHHHH

>3U22A

GACDGI LEGIYDSPAASDSNELGFIRTPSTHSGTIYIDATDYRRWTFIDFHTQKVDSVNVT DSE  
 QKEPEEWDI AVHRYDVKTNAGAVLETGFTGFSALRNADAMPEGAYVEDVWTTAKIAIDMSGMMDG  
 NIVYMESYYNEELSKWLNVDKSNMPPTYTLSNKVYMKLKDGTAAVRLTNYMNASGVKGFMTID  
 YIYPFEL

>3U0CA

GSQAANDAANKLFSLTIADLTANQNINTTNAHSTSNILIP ELKAPKSLNASSQLTLLIGNLIQIL  
 GEKSLTALTNKITAWKSQQQARQQKNLEFSDKINTLLSETEGLTRDYEQINKLKNADSKIKDLE  
 NKINQIQTRLSELDPESPEKKKLSREEIQLTIKKDAAVKDRTLIEQKTL SIHSLTKDKSMQLEKE  
 IDSFSA

>3U00A

MSENSIRLTQYSHGAGCGCKISP KVLETILHSEQAKFVDPNLLVGNETRDDAAVYDLGNGTSVIS  
 TTDFFMPIVDNPFDFGRI AATNAISDIFAMGGKPIMAIAILGWPINKLSPEIAREVTEGGRYACR  
 QAGIALAGGHSIDAPEPIFGLAVTGIVPTERVKKNSTAQAGCKLFLTKPLGIGVLT TAEKKSLLK  
 PEHQGLATEVMCRMNIAGASFANIEGVKAMTDVTFGFLLGHLSEMCQGAGVQARVDYEAI PKLPG

VEEYIKLGAVPGGTERNFASYGHLMGEMPREVRDLLCDPQTSGLLLAVMPEAENEVKATAAEFG  
IELTAIGELVPARGGRAMVEIR

>4A2NB

MNENLWKICFIVMFIIWVVFVRKVYGTAMKKNKSKKKVVRPNFEKSLVFLNFIGMVFLPLTAVFSSY  
LDSFNINLPDSIRLFALIVTFLNIGLFTKIHKDLGNNWSAILEIKDGHKLVKEGIYKNIRHPMYA  
HLWLWVITQGIILSNWVVLIFGIVAWAILYFIRVPKEEELLIEEFGDEYIEYMGKTGRLFPKVV

>3VIAA

GSMAFVKSGWLLRQSTILKRWKNWFDLWSDGHLIYYDDQTRQNIEDKVHMPMDCINIRTGQECR  
DTQPPDGKSKDCMLQIVCRDGKTIISLCAESTDDCLAWKFTLQDSRTN

>4A2AA

MIDLSKTVFYTSIDIGSRYIKGLVLGKRDQEWELAFSSVKSRLDEGEIKDAIAFKESVNTLLK  
ELEEQLQKSLRSDFVISFSSVSFEREDTVIERDFGEEKRSITLDILSEMQSEALEKLEKENGKTPL  
HIFSKRYLLDDERIVFNPLDMKASKIAIEYTSIVVPLKVYEMFYNFLQDQTVKSPFQLKSSLVSTA  
EGVLTTPKDRGVVVVNLGYNFTGLIAYKNGVPIKISYVPMKHKVVDVSAVLDTSFEESERLI  
ITHGNAVYNLKEEEIQYRGLDGNTIKTTAKKLSVIIHARLREIMSKSKKFFREVEAKIVEEGE  
IGIPGGVVLTTGGGAKIPRINELATEVFKSPVRTGCYANSRPSIINADEVANDPSFAAAFVGNVFA  
VSENPEETPVKSENPLKKIFRLFKELME

>4A25A

TTIHDVQTTGLTQDAVTGFDASSRLNAGLQEVLDLTLALHLQKQAHWNIVGENWRDLHLQLDTL  
VEAARGFSDDVAERMRAVGGVDPARPQTVAASRIGDVGPDDEIDTRACVEAIVALVRHTVDTIRRV  
HDPIDAEDPASADLLHAITLELEKQAWMIGSENRSRRR

>3TWLA

MPPELPEVEAARRAIEENCLGKKIKRVI IADDNKVIHGISPSPDFQTSILGKTIISARRKGKNLWLE  
LDSPFPFSPQFGMAGAIYIKGVAVTKYKRSKAVKDESEWPSKYSKFFVELDDGLELSFTDKRRFAK  
VRLLANPTSVSPISELGPDALLEPMTVDEFAESLAKKKITIKPLLLDQGYISGIGNWIADEVLYQ  
ARIHPLQATASSLSKEQCEALHTSIKEVIEKAVEVDADSSQFPSNWI FHNREKKPGKAFVDGKKID  
FITAGGRRTAYVPELQKLYGKDAEKAQKVRPAKRGVVKPKEDDGDHHHHHH

>3TVLA

MAOGLIEVERKFLPGPGTEERLQELGGTLEYRVTFRDYYDTPELSLMQADHWLRRREDSGWELK  
CPGAAGVLGPHTYKELTAEPTIVAQLCKVLRADGLGAGDVAAVLGPLGLQEVASFVTKRSAWKL  
VLLGADEEPPQLRVLDLDTADFGYAVGEVEALVHEEAQVPTALEKIHRLSSMLGVPAQETAPAKLI  
VYLQRFQDYQRLLEVNSSRERPQETEDPDHCLG

>3TV0A

GSSSMAEKTQKSVKIAPGAVVCVESEIRGDVTIGPRTVIHPKARI IAEAGPIVIGEGNLEEQAL  
IINAYPDNITPDTEDEPKPMIIGTNNVFEVGCYSQAMKMGDNNVIESKAYVGRNVILTSGCIIG  
ACCNLNTEFEVIPENTVIYGADCLRRVQTERPQPQTLQLDFLMKILPNYHHLKKTMKGSSTPVKN

>3TURA

RRYTLNATALGLGGAATRQLTFQTSSPAHLTMPYVMPGDGEVVGVEPVAIRFDENIADRGAEEK  
AIKITTNPVEGAFYWLNNREVRWRPEHFVKPGTAVDVAVNTYGVLDGEGMFGEDNVQTHFTIGD  
EVIATADDNTKILTVRVNGEVVKSMPSTSMGKDSTPTANGIYIVGSRYKHIIMDSSTYGVVNSPN  
GYRTDWDWATQISYSGVFVHSAPWSVGAQGHNTSHGCLNVSPSNAQWFYDHWKRGDIVEVVNTV  
GGTLPIDGLGDWNIIPWDQWRAGNAKA

>3TUNA

GP GSMKVEKVFVVTSPIIYVNAAPHIGHVYSTLITDVI GRVHRVKGERVFALTGTDEHGQKVAEA

AKQKQVSPYDFTTAVAGEFKKCFEQMDYSIDYFIRTTNEQHKAVVKELWTKLEQKGDYILGRYEG  
 WYSISDESFLTPQNIITDGVDDKGNPCKVSLESQHVVTWVSEENYMFRLSAFRERLLEWYHANPGC  
 IVPEFRRREVIRAVEKGLPDLVSRRARATLHNWAI PVPGNDHCVYVWLDALTNYLTSRLRVDE  
 SGKEVSLVDDFNELERFPADVHVIGKDILKFHAIYWPAPFLLSAGLPLPKKIVAHGWWTKDRKKIS  
 KSLGNVFDVPEKAEEFGYDALKYFLLRESGFSDDGDYSDKNMIARLNGELADTLGNLVMRCTSAK  
 INVNGEWPSPAAYTEEDESLIQLIKDLPGTADHYLLIPDIQKAI IAVFDVLRAINAYVTDMAPWK  
 LVKTDPERLRVTVLYITLEGVRVTTLLLSPIPRKSVVIFDMLGVPEVHRKGIENFEFGAVPPGTR  
 LGPAVEGEVLFVSKRSTENTKST

>3TU5A

MCDEDETTALVCDNGSGLVKAGFAGDDAPRAVFP SIVGRPRHQGVMVGMGQKDSYVGDEAQSKRG  
 ILTLKYPIEHGIITNWDDMEKIWHHTFYNELRVAPEEHPTLLTEAPLNPKANREKMTQIMFETFN  
 VPAMYVAIQAVLSLYASGRTTGIVLDSGDGVTHNVPIYEGYALPHAIMRLDLAGRDLTDYLMKIL  
 TERGYSFVTTAEREIVRDIKEKLCYVALDFENEMATAASSSSLEKSYELPDGQVITIGNERFRCP  
 ETFLQPSFIGMESAGIHETTYNSIMKCDIDIRKDLYANNVMSGGTTMYPGIADRMQKEITALAPS  
 TMKIKI IAPPERKYSVWIGGSILASLSTFQQMWITKQEYDEAGPSIVHRKCF

>3TU3A

MHHHHHSSGVDLGTENLYFQSNAMIDTWLAQWGLRPLSSNDATLRLQPAEGPELVMERLEGGWL  
 FVVVELGLVPSGLPLGVILQLLQVNSPSSSLAPVKLAADDAGRLVLWAEARDGVDDVDALNRLHDR  
 LREGHSRLVPLLEPTGELVPAQIQTSALVFV

>3TT1A

MEVKREHWATRLGLILAMAGNAVGLGNFLRFPVQAAENGGGAFMIPYIIAFLLVGIPLMWIEWAM  
 GRYGGAQGHGTTPAIFYLLWRNRFAKILGVFGLWIPLVVAIYFVYIESWTLGFAIKFLVGLVPEP  
 PPNATDPDSILRPFKEFLYSYIGVPKGDEPILKPSLFAYIVFLITMFINVSILIRGISKGIERFA  
 KIAMPFLFILAVFLVIRVFLLETPNGTAADGLNFWLWTPDFEKLKDPGVWIAAVGQIFFTSLGFG  
 AIIITYASYVRKDQDIVLSGLTAATLNEAAEVILGSSISIPAAVAFFGVANAVAIKAGAFNLGFI  
 TLP AIFSQTAGGTFLGFLWFFLLFFAGLTSSIAIMQPMIAFLEDELKLSRKHAVLWTA AIVFFSA  
 HLVMFLNKSLDEMDFWAGTIGVVFFGLETELI IFFWIFGADKAWEEINRGGI I KVPRIYYYVMRYI  
 TPAFLAVLLVWAREYI PKIMEETHWTVWITRFYIIIGLFLFLTFLVFLAERRRNHESAGTLVPR

>4A0XA

MRGETLKLKKDKRREAIRQQIDSNPFITDHELSDLFQVSIQTIRLDRTYLNIPELRKRKIKLVAEK  
 NYDQISSIEEQEFIGDLIQVNPVKAQSILDITSDSVFHKGTGIARGHVLFAQANSLCVALIKQPT  
 VLTHESSIQFIEKVKLNDTVRAEARVVNQTAKHYVEVKS YVKHTLVFKGNFKMFYDKRG

>3TS9A

GHMDTRENPFKEKLEIMASIQTYCQKSPMSDFGTQH YEQWAIQMEKKA AKDGNRKDRVCAEHLR  
 KYNEALQINDTIRMIDAYSHLET FYTDEKEKKFAVLNDSKSKLKLDETDEFLMNLFFDNKMLKK  
 LAENPKYE

>3VHXB

GSLLFQPDQNAPP IRLRHRRSRSAGDRWVDHKPASNMQTETVMQPHVPHAITVSVANEKALAKCE  
 KYMLTHQELASDGEIETKLIKGDYKTRGGGQSVQFTDIETLKQESPNGSRKRRS

>3TRTA

GGSKPDC TAAMRDVRQQYESVAAKNLQEAEEWYKSKFADLSEAANRNNDALRQAKQESTEYRRQV  
 QSLTMEVDALKG

>4A0EA

GGGSWVCRFYQKHRGVEVELPHGRCVFGSDPLQSDIVLSDSEIAPVHLVLMVDEEGIRLTD SAE

PLLQEGLPVPLGTLLRAGSCLEVGFLWTFVAVGQPLPETLQVPTQRKEPTDRLPRSR

>4A03A

TMAHHHHHVNTSTDGRADGRLRVVVLGSTGSIQTALQVIADNPDRFEVVGLAAGGAHLDTLLR  
 QRAQTGVTNIAVADEHAAQRVGDIPYHGSDAATRLVEQTEADVVLNALVVGALGLRPTLAALKTGA  
 RLALANKESLVAGGSLVLRARPGQIVPVDSEHSALAQCLRGGTPDEVAKLVLTASGGPFRGWSA  
 ADLEHVTPEQAGAHPTWSMGPMNTLNSASLVNKGLEVIETHLLFGIPYDRIDVVVHPQSIHSMV  
 TFDIGSTIAQASPPDMKLPISLALGWPRRVSGAAAACDFHTASSWEFEPLDTDVFPAVELARQAG  
 VAGGCMTAVYNAANEEAAAFLAGRIGFPAIVGIIADVLHAADQWAVEPATVDDVLDARWARER  
 AQRVAVSGM

>3T08A

MGHHHHHHDSPVLMVYGLDQSKMNCDRVFNVFLYGNVEKVKFMKSKPGAAMVEMADGYAVDRAI  
 THLNNNFMFGQKLNVCVSKQPAIMPGQSYGLEDGSCSYKDFSESRNNRSTPEQAAKNRIQHPSN  
 VLHFFNAPLEVTEENFFEICDELGVKRPSSVKVFSGKSERSSSGLLEWESKSDALETLGFLNHYQ  
 MKNPNGPYPYTLKLCFSTAQHAS

>3TNXA

MHHHHHHSSGLVPRGSGMKETAATAKFERQHMDSPDLGTDDDDKMDFSIVGYSQNDLTSTERLIQL  
 FESWMLKHNKIYKNIDEKIYRFEIFKDNLYIDETNKKNNSYWLGLNVFADMSNDEFKEKYTGSI  
 AGNYTTTELSYEEVLNDGDVNIPEYVDWRQKAVTPVKNQGSCGSAWAFSAVSTIESIIKIRTGN  
 LNEYSEQELLDCCRYSYGCNGGYPWSALQLVAQYGIHYRNTYPYEGVQRYCRSREKGPYAAKTDG  
 VRQVQPYNEGALLYSIANQPVSVVLEAAGKDFQLYRGGIFVGPCKNKVDHAVAAVGYGPNYILIR  
 NSWGTGWGENGYIRIKRGTGNSYGVCGLYTSSFPVKN

>3ZZOA

ECCTSRELVEFKMDRGDCEAVRAIENYPNGCEVTICADGVAQLGAYCGQGPCNIFGCNCDGGCLS  
 GDWSQEFVRRNQYGIQIIKVTRLPFWRPL

>3TMUA

MRSLLILVLCFLPLAALGKVFGRCELAAAMKRHGLDNRYGYSLGNWVCAAKFESNFNTQATNRNT  
 DGSTDYGILQINSRWWCNDGRTPGSRNLCNIPCSALLSSDITASVNCACKIVSDGNMNAWVAWR  
 NRCKGTDVQAWIRGCR

>3TKLB

GPLGSTSSTSQADKEIQKMLDEYEQAIKRAQENIKKGEELEKLDKLERQKDLKDYKTYEENL  
 EGFELKLLTDSEELSLSEINEKMKAFSKDSEKLTQLMEKHKGDEKTVQSLQREHHDIKAKLANLQV  
 LHDAHTGKKSIVNEKGNPVSSLKDAHLAINKDQEVVEHKGQFYLLQKGQWDAIKNDPAALEKAQK  
 DYSQSKHDLATIKMEALIHKLSLEMEKQLETINDLIMSTDPKENEATKLLHKHNGLNKLANLQ  
 DMLAVHR

>3TIKA

KGKLPPVYPVTVPILGHI IQFGKSPFGMQECKRQLKSGIFTINIVGKRVTIVGDPHEHSRFFLP  
 RNEVLSPREVYSFMVPVFGGEGVAYAAPYPRMREQLNFLAEELTIAKFQNFVPAIQHEVRKFMAAN  
 WDKDEGEINLLED CSTMI INTACQCLFGEDLRKRLDARRFAQLLAKMESSLIPAAVFLPILLKLP  
 LPQSARCHEARTELQKILSEII IARKEEEVNKDSSTSDLLSGLLSAVYRDGTPMSLHEVCGMIVA  
 AMFAGQHTSSITTTWSMLHLMHPANVKHLEALRKEIEEFPAQLNYNNVMDEMPFAERCARESIRR  
 DPPLLMLMRKVMADVKGVSYPVPGDIIACSPLSHHDEEAFPEPRRWDPERDEKVEGAFIGFGA  
 GVHKCIGQKFGLLQVKTILATAFRSYDFQLLRDEVPDPDYHTMVVGPTASQCRVKYIRRKAAA

>3TH0A

YDPDQYSIEADKKFKYSVKLSDYPTLQDAASAAMDGLLIDRDYNYGGETVDFGGKVLTIIECKAK

FIGDGNLIFTKLGKGSRIAGVFMESTTTPWVIKPWTDDNQWLTDAAAVVATLKQSKTDGYQPTVS  
 DYVKFPGIETLLPPNAKGQONITSTLEIRECIGVEVHRASGLMAGFLFRGCHFCKMVDANNPSGGK  
 DGIITFENLSGDWKGKGYVIGGRTSYGSVSSAQFLRNNGGFERDGGVIGFTSYRAGESGVKTWQG  
 TVGSTSRNYNLQFRDSVVIYPVWDGFDLGDADTMNPELDRPGDYPITQYPLHQPLNHLIDNLL  
 VRGALGVGFGMDGKGMVSNITVEDCAGSGAYLLTHEVFTNIAIIDTNTKDFQANQIYISGACR  
 VNGLRLIGIRSTDGQSLTIDAPNSTVSGITGMVDPSRINVANLAEGLGNIRANSFGYDSAAIKL  
 RIHKLSKTLDSGALYSHINGGAGSGSAYTQLTAISGSTPDAVSLKVNHKDCRGAEIFVVPDIASD  
 DFIKDSSCFLPYWENNSTSLKALVKKPNGELVRLTLATL

>3TGUB

SLKVAPKVAVSAAAERVKLCPGAEDLEITKLPNGLI IASLENFSPASRIGVFIKAGSRYETTANL  
 GTAHLRLRLASPLTTKGASSFRITRGIEAVGGSLSVYSTREKMTYCVECLRDHVDTVMEYLLNVTT  
 APEFRPWEVTDLQPQLKVDKAVAFQSPQVGVLENLHAAAYKTALANPLYCPDYRIGKITSEQLHH  
 FVQNNFTSARMALVGIGVKHSDLKQVAEQFLNIRSGAGTSSAKATYWGGEIREQNGHSLVHAADV  
 TEGAAVGSAAEAFSVLQHVLGAGPLIKRGSSVTSKLYQGVAKATTQPFDAFAFNVNYSDSGLFG  
 FYTISQAAHAGEVIRAAMNQLKAAAQGGVTEEDVTKAKNQLKATYLMVETAQGLLNEIGSEALL  
 SGTHTAPSVVAQKIDSVTSADVNAAKKFVSGKKSMAASGDLGSTPFLDEL

>3ZXUB

MDFSSSSGVLDSERNTGSNDSDEPSSSHSDVIETEELKLIKLOEHKNNLLRQRSELLDQLSQRV  
 EPRSVQLDDKLLKLLRRNDNAVSDSSQSSNNPLPRVLPVSLNIEQRKKYLDITLNDVTVTCEKDM  
 ILLRKGSTASFRIAVENESIRSMADLNAFEVELQPI IQYAEDTQNVNVAMMAVVQFLRIKELH  
 EQMISKIVEASKFIRASNNTITLNDLEVSFHCYWNLPSPYPETLILTNKVQKILDFLIYQYGIQL  
 GVIKYGSTII

>2LHRA

SDDYVDEETYNLQKLLAPYHKAKTLERQVYELEKLOEKLPKEYKAEYKKKLDQTRVELADQVKA  
 VTEFENVTPNDQ

>3TEEA

QDINAQLTTWFSQRLAGFSDEVVTLRSPNLLPSCEQPAFSMTGSAKLWGNVNVVARCANEKRY  
 LQVNVQATGNVVAVAAPIARGGKLTAPANVTLKRGRLDQLPPRTVLDIRQIQDAVSLRDLAPGQPV  
 QLTMIQAWRVKAGQVRVQVIANGEGFSVNAEQAMNNAVAQNAVRMTSGQIVSGTVSDGNIL  
 INLDPNSSSVDKLAAALEHHHHHH

>3TDOA

MGRAHKETLDKLTNAAINKINLLNTSKVKYLVSFAFAGLYVGIGILLIFTIGGLLTDAGSPMTKI  
 VMGLSFAIALSLVIMTGTLEFTGNMVMMSAGMLNKGVS IKDTSKIWAYSWVGNLIGALVVGII FV  
 GTGLVDKGPVAEFFANTAASKASMPFTALFFRGILCNILVCVSVLCSFRTNSDTAKI IMIFLCLF  
 AFITSGFEHSVANMTIYSVSLFSPTISTVITIGGAIYNLVAVTLGNIVGGALFMGLGTYILGKEKL  
 NAAAENLY

>3TCJA

MSQFTLYKNKDKSSAKTYPYFVDVQSDLLDNLNTRLVIPLELTDKAPSHLCPTIHIDEQDF  
 IMLTQQMTSVPVKILSEPVNELSTFRNEIIAAIDFLITGI

>3ZXBA

FTCPECRPELCPGDPGYCEYGTTKDACDCCPVCFOGPGGYCGGPEDVFGICADGFACVPLVGERDS  
 QDPEIVGTCVKIP

>3VGBA

TFAYKIDGNEVIFTLWAPYQKSVKLVLEKGLYEMERDEKGYFTITLNNVKVRDRYKYVLDDASE

IPDPASRYQPEGVHGPSQIIQESKEFNNETFLKKEDLI IYEIHVGTFTPEGTFEGVIRKLDYDKD  
 LGITAEIMPIAQFPGKRDWGYDGVYLYAVQNSYGGPEGFRKLVDEAHKKGLGVILDVVYNHVGP  
 EGNMVKLGPYFSQKYKTPWGLTFNFDDAESDEVKRFI LENVEYWIKEYNVDGFRLDVHAI IDT  
 SPKHILEE IADVHKNRIVIAESDLNDPRVVPKEKCGYNIDAQWVDDFHHSIHAYLTGERQGY  
 YTD FGNLDDIVKSYKDVVYDGKYSNFRRKTHGEPVGE LDCNFVVI IQNHDQVGNRKGGERI IK  
 LVDRESYKIAAALYLLSPYIPMIFMGEEYGEENPFYFFSDFSDSKLIQGVREGRKKENGQDTPQ  
 DESTFNASKLSWKIDEEIFSFYKILIKMRKELSIACDRRVNVVNGENWLI IKGREYFSLYVFSKS  
 SIEVKYSGTLLLSSNNSFPQHIEEGKYEFDKGFALYKL

>3ZX8A

MENDPRVRKFASDGAQWAIKWQKKGWSTLTSRQKQTARAAMGIKLS PVAQPVQKVTRLSAPVALA  
 YREVSTQPRVSTARDGITRSGSELITTLKKN TDTEPKYTTAVLNPSEPGTFNQLIKEAAQYEKYR  
 FTSLRFRYSPMSPSTTGGKVALAFDRDAAKPPPNDLASLYNIEGCVSSVPWTGFILTVPTDSTDR  
 FVADGISDPKLVDFGKLI MATYGGAAQLGEVRVEYTVQLKNRTGSTSAQIGDFAGVKDGPRLVS  
 WSKTKGTAGWEHDCHFLGTGNFSLTLFYEKAPVSGLENADASDFSVLGEAAAGSVQWAGVQVAER  
 GQGVKMTTEEQPKGKWQALRI

>3TBLA

MFEARLVQGSILKKVLEALKDLIN EACWDISSSGVNLQSMDS SHVSLVQLTLRSEGFD TYRCDRN  
 LAMGVNLTSMSKILKAGNEDIITLRAEDNADTLALVFEAPNQEKVSDYEMKLMDDLVEQLGIPE  
 QEYSCVVKMPSGEFARICRDL SHIGDAVVISCAKDGVKFSASGELGNGNIKLSQTSNVDKEEEEAV  
 TIEMNEPVQLTFALRYLNFFTKATPLSSTVTLSMSADVPLVVEYKIADMGHLKYYLAPKIEDEEG  
 S

>3TAYA

GSLLDGPYQPTTFNPTS YWILLAPTVEGVVIQGTNNIDRWL ATILIEPNVQTTNRIYNLFGQQV  
 TLSVENTSQTQWK FIDVSKTTP TGNYTQHGS L FSTPKLYAVMKFSGRIYTYNGTTPNATTGYYST  
 TNYDVTNMTSFCDFYIIPRNQEEKCTEYINHGL

>3ZWSA

MATGDERFYAEHLMPTLQGLLD PESAHRLAVRFTSLG L LPRARFQDS DMLEVRVLGHKFRNPVGI  
 AAGFDKHGEAVDGLYKMGFGFVEIGSVTPK PQEGNPRPRVFR LPEDQAVINRYGFNSHGLSVVEH  
 RLRARQQKQAKLTEDGLPLGVNLGKNKTSVDAAEDYAEGVRVLG PLADYLVVNVSSPNTAGLRSL  
 QGKAELRLLTKVLQERDGLRRVHRPAVLVKIAPDLTSQDKEDIASVVKELGIDGLIVTNTTVSR  
 PAGLQGALRSETGGLSGKPLRDLSTQTIREMYALTQGRVPIIGVGGVSSGQDALEKIRAGASLVQ  
 LYTALTFWGPPVVGKVKRELEALLKEQGGVTD AIGADHRR

>3T60A

MHLKIVCLSDEVREMYKNHKTHHEGDSGLDLFIVKDEVLPKSTTFVKLG IKAIALQYKSNYYYK  
 CEKSENKKDDDKSNIVNTSFLLFPRSSI SKTPLRLANSIGLIDAGYRGEIIAALDNTSDQEYHI  
 KKNDKLVQLVSFTGEPLSFELVEELDETSRGE GGGFGSTSNKYLEHHHHHH

>3T5VA

GSPLPSDVRPPHILVKTLDYIVDNLLTTLPESEGLWDRMRSIRQDFTYQNYSGPEAVDCNERIV  
 RIHLLILHIMVKSNEFSLQQELEQLHKSLITLSEIYDDVRSSGGTCPNEAEFRAYALLSKIRDP  
 QYDENIQRLPKHIFQDKLVQMALCFRRVISNSAYTERGFVKTENCLNFYARFFQLMQSPSLPLLM  
 GFFLQMH L TDIRFYALRALSHTLNKHKKPIPFIIYLENMLLFNNRQEIIEFCNYYSIEIINGDAAD  
 LKTLQHYS HKLSETQPLKKT YLTCLERRLQKTTYKGLINGGEDNLASSVYVKDPKK

>3T63M

PAQDNSRFVIRDRNWHPKALTPDYKTSIARS PRQALVSI PQS ISETTGPNF SHLGF GAHDH D L L L

NFNNGGLPIGERIIIVAGRVVDQYGKPVNPTLVEMWQANAGGRYRHKNDRYLAPLDPNFGGVGRCL  
 TDSDGYYSFRTIKPGPAPWRNGPNDWRPAHIYFGISGPSIATKLITQLYFEGDPLIPMCPIVKS  
 ANPEAVQQLIAKLDNMNANPMDCLAYRFDIVLRGQRKTHFENC

>3T6BA

MADTQYILPNDIGVSSLDCREAFRLSPPTERLYAYHLSRAAWYGGGLAVLLQTSPEAPYIYALLSR  
 LFRAQDPDQLRQHALAEGLTEEEYQAFVLYAAGVYSNMGNYSFGDTKFVPNLPKEKLERVILGS  
 EAAQQHPPEEVRGLWQTCGELMFSLEPRLRHLGLGKEGITTYFSGNCTMEDAKLAQDFLDSQNL  
 SAYNTRLFKVEVDGEGKPYEVRLASVLGSEPSLDSEVTSKLKSIEFRGSPFQVTRGDYAPILQKVVE  
 QLEKAKAYAANSHQGQMLAQYIESFTQGSIEAHKRGSRFWIQDKGPIVESYIGFIESYRDPFGSR  
 GEFEGFVAVVNKAMSAKFERLVASAEQLLKEPWPPTFEKDKFLTPDFTSLDVLTFAGSGIPAGI  
 NIPNYDDLRLQTEGFKNVSLGNVLAVAYATQREKLTFLLEDDKDLYILWKGPSFDVQVGLHALLGH  
 GSGKLFVQDEKGAFFNFQETVINPETGEQIQSWYRSGETWDSKFSTIASSYEECRAESVGLYLCL  
 HPQVLEIFGFEGADAEDVIYVNWLMVVRAGLLALEFYTPFAFNWRQAHMQARFVILRVLLEAGEG  
 LVTITPTTGS DGRPDARVRLDRSKIRSVGKPALERFLRRLQVLKSTGDVAGGRALYEGYATVTD  
 APPECFLTLRDTVLLRKE SRKLIVQPNTRLEGS DVQLLEYEASAAGLIRSF SERFPEDGPELEEIL  
 TQLATADARFW

>3T5AA

MGSSHHHHHSSGLVPRGSHMSVRS LPAALRACARLQPHDPAFTFMDYEQDWDGVAITLTSQLY  
 RRTLNVAQELSRCGSTGDRVVISAPQGLE YVVAFLGALQAGRIAVPLSVPQGGVTDERSDSVLS  
 DSSPVAILTSSAVDDVVQHVARRPGESPPSIEVDLLDLDA PNGYTFKEDEY PSTAYLQYTS GST  
 RTPAGVVM SHQNRVNFEQLMSGYFADTDGIPPPNSALVSWLPHYHDMGLVIGICAPILGGYPAV  
 LTSPVSFLQRPARWMHLMASDFHAFSAAPNFAFELAAARRTDDDMAGRDLGNILTILSGSERVQA  
 ATIKRFADR FARFNLQERVIRPSYWLAEATVYVATSKPGQPPE TVDFDTE SL SAGHAKPCAGGGA  
 TSLISYMLPRSPIVRIVSDTDCIECPDGTVEI WWHGDNVANGYWQKPDESERTFGGKIVTPSPG  
 TPEGPWLRTGDSGFVTDGKMFII GR

>2LGDA

GSMALPIIVKWGGQEYSVTTLSEDDTVL DLKQFLKTLTGVLPERQKLLGLKVKGKPAENDVKLGA  
 LKLPNTKIMMMGTREES

>3T1HR

MSTKNAKPKKEAQRPSRKAKVKATLGEFDLRDYRNVEVLKRFLSETGKILPRRRTGLSGKEQRI  
 LAKTIKRARILGLLPFTEKLV RK

>3T1HQ

MPKKVLTGVVSDKMQKTVTVLVERQFPHPLYGKVIKRSKYL AHDPEEKYKLG DVVEIIESRPI  
 SKRKRFRVRLRVESGRMDLVEKYLIRRQNYQSLSKRGGKA

>3ZUIA

DSESDCTGSEPVDAFQAFSEGKEAYLVRSTDPKARDCLKGEPAGEKQDN TLPVMMTFKNGTDWA  
 STDWTF TLDGAKVTATLGNLTQNREVVYDSQSHHCHVDKVEKEVPDYEMWMLDAGGLEVEVECCR  
 QKLEELASGRNQMYPHLKDC

>3SX6A

MRSAGHVVILGAGTGGMPAAAYEMKEALGSGHEVT LISANDYFQFVPSNPWVGWGERDDIAFPI  
 RHYVERKGIHFIAQSAEQIDAEAQNI TLADGNTVHYDYLM IATGPKLAFENVPGSDPHEGPVQSI  
 CTVDAERAF AEYQALLREPGPIVIGAMAGASC FGPAYEYAMIVASDLK KRGMRDKIP SFTFITS  
 EPYIGHLGIQGVGDSK GILTKGLKEEGIEAYTNCKVTKVEDNKMYVTQVDEKGETIKEMVLPVKF  
 GMMIPAFKGVPAVAGVEGLCNPGGFVLVDEHQRSKKYANIFAAGIAIAIPPVETTPVPTGAPKTG

YMIESMVSAAVHNIKADLEGRKGEQTMGTWNAVAFADMGRGAFFIALPQLKPRKVDVFAYGRWV  
HLAKVAFEKYFIRKMKMGVSEPFYKVLFKMMGITRLKEEDTHRKAS

>3SWMA

HHHHHHMGIQETDPLTQLSLPPGFRFYPTDEELMVQYLCRKAAGYDFSLQLIAEIDLYKFDPWVL  
PNKALFGEKEWYFFSPRDRKYPNGSRPNRVAGSGYWKATGTDKIIISTEGQRVGIKKALVFIYIGKA  
PKGTKTNWIMHEYRLIEPSRRNGSTKLDDWVLCRIYKKQSSAQK

>3STTA

GSMEKSMSPFVKKHFLVHTAFHGAWCWYKIVALMRSSGHNVTALDLGASGINPKQALQIPNFSD  
YLSPLMEFMAASLPANEKIIILVGHALGGLAISKAMETFPEKISVAVFLSGLMPGPNIDATTVCTKA  
GSAVLGQLDNCVYENGPTNPPTTLIAGPKFLATNVYHLSPIEDLALATALVRPLYLYLAEDISK  
EVLVSSKRYGSVKRVFIVATENDALKKEFLKLMIEKNPPDEVKEIEGSDHVTMMSKPPQLFTTLL  
SIANKYK

>3SS3A

GSHMVAAGDNKIKQGLLPSLEDLLFYTIAEGQEKIPVHKFITALKSTGLRTSDPRLKECMDMLRL  
TLQTTSDGVMLDKDLFKKCVQSNIVLLTQAFRRKFVIPDFMSFTSHIDELYESAKKQSGGKVADY  
IPQLAKFSPDLWGVSVCTVDGQRHSIGDTKVPFCLQSCVKPLKYAIAVNDLGTEYVHRYVGKEPS  
GLRFNKLFLNEDDKPHNPMVNAGAIIVTSLIKQGVNNAEKFDYVMQFLNKMAGNEYVGFSNATFQ  
SERESGDRNFAIGYYLKEKKCFPEGTDVMGILDYFYQLCSIEVTCEASVMAATLANGGFCPITG  
ERVLSPEAVRNTLSLMHSCGMYDFSGQFAFHVGLPAKSGVAGGILLVVPNVMMMCWSPPLDKMG  
NSVKGIFHCHDLVSLCNFHNYDNLRFHAKKLDPRREGGDQRHSFGPLDYESLQQELALKDVTVKK  
VSPESDDTSTTVVYRMESL GERS

>3SQRA

MKYFTVFTALTALFAQASASAIPAVRSTLTPRQNTTASCANSATSRSCWGEYSIDTNWYDVTPTG  
VTREYWLSVENSTITPDGYTRSAMTFNGTVPGPAIIADWGDNLI IHVTNNLEHNGTSIHWHGIRQ  
LGSLEYDGVPGVTQCPIAPGDTLTYKFQVTQYGTWYHSHFSLQYGDGLFGPLIINGPATADYDE  
DVGVIIFLQDWAHESVFEIWDTARLGAPPALENTLMNGTNTFDCSASTDPNCVGGGKFEFTVEG  
TKYRLRLINVGIDSHFEFAIDNHTLTVIANDLVPIVPYTTDTLLIGIGQRYDVIVEANAAADNYW  
IRGNWGTTCSTNNEAANATGILRYDSSSIANPTSVGTTPRGTCEDEPVASLVPHLALDVGYSLV  
DEQVSSAFTNYFTWTINSSSLLLDWSSPTTLKIFNNETIFPTEYNVVALEQTNANEWVYVIED  
LTGFGIWHPIHLHGHDFFI VAQETDVFNSDESPAKFNLVNPPRRDVAALPGNGYLAI AFKLDNPG  
SWLLHCHIAWHASEGLAMQFVESQSSIAVKMTDTAIFEDTCANWNAYTPTQLFAEDDSGI

>3S06A

MEGMVFSKYLGMTLVERPKGEELSAAVKRIVATAKASGKKLQKVTLVKVS PRGI ILTDSLTSQL  
IENVSIYRISYCTADKMHDKVFAYIAQSQQNESLECHAFLCTKRKVAQAVTLTVAQAFKVAFEFW  
QVSLVPR

>3SMHA

SRNNPFYFPSRRFSTRYGNQNGRIRVLQRFDQRSRQFQNLQNHRIVQIEAKPNTLVLPKHADADN  
ILVIQQGQATVTVANGNNRKS FNLDEGHALRIPSGFISYILNRHDNQNLRVAKISMPVNTPGQFE  
DFFPASSRDQSSYLQGF SRNTLEAAFNAEFNEIRRVLLEENAGGEQEERGQRRWSTRSSENEG  
IVKVSKEHVEELTKHAKSVSKKGSEEEGDITNPINLREGEPDLSNNGKLFVVKPKKPNQLQDL  
DMMLTCVEIKEGALVLPHFNSKAMVIVVVKGTGNLELVAVRKEQQQRGRREEEEDDEEEEGSN  
REVRRYTARLKEGDVFI MPAAHPVAINASSELHLLGFGINAENNHRI FLAGDKDNVIDQIEKQAK  
DLA FPGSGEQVEKLIKQKESHFVSARP

>3B18A



MSHTDLTPCTRVLASSGTVPPIAEELLARVLEPYSCKGCRYLIDAQYSATEDSVLAYGNFTIGESA  
YIRSTGHFNAVELILCFNQLAYSAPAVLNNEEIRVLRGWSIDDYCQHQLSSMLIRKASSRFRKP  
LNPQKFSARLLCRDLQVIERTWRYLKVPCVIEFWDENGAASGEIELAALNIP

>3ZSCA

SLNDKPVGFASVPTADLPEGTVGGLGGEIVFVRTAEELKYYTTAEGKYVIVVDGTIVFEPKREIK  
VLSDKTIVGINDAKIVGGGLVIKDAQNVIIRNIHFEGFYMEDDPRGKKYDFDYINVENSHHIWID  
HITFVNGNDGAVDIKKYSNYITVSWNKFVDHDKVSLVGSSEKEDPEQAGQAYKVTYHHNYFKNLI  
QRMPIRIRFGMAHVFNNFYSMGLRTGVSNGVFPYIGVASAMGAKVHVEGNYFMGYGAVMAEAGIAF  
LPTRIMGFVEGYLTLGEGDAKNEFYCKEPEVRPVEEGKPALDPREYYDYTLDPVQDVPKIVVDG  
AGAGKLVFEELNTAQ

>2LENA

MQLKPMIEINPEMLNKVLYRLGVAGQWRFDVVLGLEEESLGSVPAPACALLLLFPLTAQHENFRKK  
QIEELKGQEVSPKVYFMKQITIGNSCGTIGLIHAVANNQDKLGFEDGSVLKQFLSETEKMSPEDRA  
KCFEKNEAIQAAHDAVAQEGQCRVDDKVNHFHILFNNVDGHLIELDGRMPFPVNHGASSEDTLK  
DAAKVCREFTEREQGEVRFSAVALCKAALEHHHHHH

>2LELA

VDMSNVVKTYDLQDGSKVHVFKDGKMGMENKFGKSMNMPGKVMETRDGTKIIMKGNEIFRLDEA  
LRKGHSEGG

>3SGZA

PLVCLADFKAHAQKQLSKTSWDFIEGEADDGITYSENIAAFKRIRLRPRYLDRMSKVDTRTTIQG  
QEISAPICISPTAFHSIAWPDGEKSTARAAQEANICYVISSYASYSLEDIVAAAPEGFRWFQLYM  
KSDWDFNKQMVQRAEALGFKALVITIDTPVLGNRRRDKRNQLNLEANILKAALRALKEEKPTQSV  
PVLFPKASFCWNDSLQSIITRLPIILKGIKEDAEELAMKHNQVQIVVSNHGGRLDEVASID  
ALREVVAAVKGVIEVYMDGGVRTGTDVLKALALGARCI FLGRPILWGLACKGEDGVKEVLDILTA  
ELHRCMTLSGCQSVAEISPDLIQFSRL

>3SGFY

MAAKIRRDEIVLVTGKDKGKRGKVNVLSSGKVIVEGINLVKHKQKVPALNQPGGIVEKEAAI  
QVSNVAIFNAATGKADRVGFRFEDGKKVRFKSNSETIK

>3ZQDA

GRKLLTYQVKQGDTLNSIAADFRISTAALLQANPSLQAGLTAGQSIVI PGLPDPYTIPIYHIAVSI  
GAKTLTSLNNRVMKTYPIAVGKILTQTPTGEFYIINRQRNPGGPFAYWLSLSKQHYGIHGTNN  
PASIGKAVSKGCIRMHNKDVIELASIVPNGTRVTINRGSHHHHHH

>3SCIE

RVVPSGDVVRFPNITNLCPFGEVFNATKFPVYAWERKKISNCVADYSVLYNSTFFSTFKCYGVS  
ATKLNLDLFCFSNVYADSFVVKGDDVRQIAPGQTGVIADYNYKLPDDFMGCVLAWNTRNIDATSTGN  
YNYKYRFLRHGKLRPFERDISNVPFSPDGKPCPPAFNCYWPLNDYGFYTTTIGIGYQPYRVVLS  
FELLNAPATVCGPKLSTDLIKQCVNFHHHHHH

>2YMAA

GSIGSNSIDLITKYEPIFLGSGIYFLRPFNTDERDKLMVTDNAMSNDWEITETYYQKFGNAINKM  
LSLRLVSLPNGHILQPGDSCVWLAEVVDMKDRFQTTLNLSLNLNSQRAEIFFNKTFTFNEDNGNFL  
SYKIGDHGESTELGQITHSNKADINTAEIRS

>3SBSA

MNTVPFTSAPIEVTIGIDQYSFNVKENQPFHGKIDIPIGHVHVIHFQHADNSSMRYGYWFDCRMG  
NFYIQYDPKDGLYKMMEEERDGAKFENIVHNFKERQMMVSYPKIDEEDDTWYNLTFVQMDKIRKIV

RKDENQFSYVDSSMTTVQENELLKSSLQKAGSKMEAKNEDDPAHSLNYTVINFKSREAIRPGHEM  
 EDFLDKSYLNTVMLQGI FKNSSNYFGELQFAFLNAMFFGNYSLQWHAMIELICSSATVPKHM  
 LDKLDEILYYQIKTLPEQYSDILLNERVWNICLYSSFQKNSLHNTEKIMENKYPELLGKDNEDDA  
 LIYGISDEERDDEDEHNPTIVGGLYYQRPLEHHHHHH

>2YJGA

MANIEIPYGKSKLAFDLPDERIQGILRSKAGSYKVNMSSEEDIVKRALENPIGTKRLQDLAEGKKN  
 IVIITS DHTRPVPSRITLPLLLDEIRKKNKSANVKIL IATGFHRGTTLQEMKAKFGEDLVENEQF  
 VVHDSRNSENMELIGTLPSGGKLEINKLAVEADLLVAEGFIEPHFFAGFSGGRKSILPGIASVQC  
 ILANHCSEFIKNPYARTGVLENNPIHRDMIYAAKKANLAFILNVVIDSSHKIVNAFAGHSEKAHL  
 KGCEFVSEIATVNAKPADIVITSNGGYPLDQNIYQSVKGMTAGEAACKDGGV I IAAECADGHGG  
 EGFYRWFKESKDPQDVMNKILSRGRDETLPDQWEAQILARILINHKVIMVTD SKNYEYVKDMFMT  
 PAKDLGEALKIAESIVNNSKINVI PDGVSIVREKASWSHPQFEK

>3S4EA

ASQVGVIKPWWLLLSQDAAHDLDTLKKNKVTHILNVAYGVENAFLSDFTYKSI SILDLPETNILS  
 YFPECFEFIEEAKRKDGVVLVHSNAGVSRAAAIVIGFLMNSEQTSFTSAFSLVKNARPSICPNSG  
 FMEQLRITYQEGKES

>3S44A

MKTITLYLDPASLPALNQLMDF TQNNEDKTHPRIFGLSRFKIPDNIITQYQNIHFVELKDNRPTE  
 ALFTILDQYPGNIELNIHLNIAHSVQLIRPILAYRFKHLDRVSIQQLNLYDDGSDEYVDLEKEEN  
 KDISAEIKQAQKQLSHYLLTGKIKFDNPTIARYVWQSAFPVKYHFLSTDYFEKAEFLQPLKEYLA  
 ENYQKMDWTAYQQLTPEQQAFYLTLVGFNDEVKQSLEVVQAKFI FTGTTTWEGNTDVREYYAQQQ  
 LNLNHF TQAEGLDFIGDHYKIYFKGHPRGGEINDYILNNAKNITNIPANISFEVLMMTGLLPDK  
 VGGVASSLYFSLPKEKISHIIFTSNKQVKS KEDALNNPYVKMRR LGI IDESQVIFWDSLKQLGG  
 GLEHHHHHH

>3S2SA

MGSSHHHHHHSSGLVPRGSHMASMTGGQQMGRGSM SKALISIDYTYDFVADDGKLTAGKPAQAI S  
 KAIAQVTQKAYDNGDYIFFTIDGHDEGDDFHPETKLFPPHNIKGTSGRDLYGALADFYQKHENDK  
 RVFWMDKRHYSAFSGTDLDIRLRERRVDTVVLTGVLT DICVLHTAIDAYNLGYQIEVVQSAVASL  
 SQENHQFALNHLQNVLGATIE

>3S2QA

GSHMRKQQRMVVVRAEGGGGINPEIRKNEDKVVDSVVVTELSKNITPYCRCWRS GTFPLCDGSHV  
 KHNKANGDNVGPLLLKKQ

>3S0PA

ATKKAVAVLKGNSNVEGVVTL SQDDDGPTTVNV RITGLAPGLHG FHLHEYGD TTNGCMSTGAHFN  
 PNKLTHGAPGDEIRHAGDLGNIVANADGVAEVTLV DNQIPLTGPN SVVGRALVVHELEDDLKGG  
 HELSLTTGNAGGRLACGVVGLTPI

>3AYQA

FAGGTVSQRCLSCICKMESGCRNVGCKMDMGSLS CGYFQIKEAYWIDCGRPGSSWKSCAASSYCA  
 SLCVQNYMKRYAKWAGCPLRCEGFAREHNGGPRGCKK GSTIGYWNRLQKISGCHGVQ

>3RZIA

MNWTVDIPIDQLPSLPPLPTDLRTRLDAA LAKPAAQQPTW PADQALAMRTVLESVPPVTPVSEIV  
 RLQEQLAQVAKGEAFL LQGGCAETFM DNTEPHIRGNVRALLQMAVVLT YGASMPVVKVARIAGQ  
 YAKPRADIDALGLRSYRGDMINGFAPDAAAREHDP SRLV RAYANASAAMNLVRALTSSGLASLH  
 LVHDWNREFVRTSPAGARYEALATEIDRGLRFMSACGVADRNLQTAEIYASHEALVLDYERAMLR

LSDGDDGEPQLFDLSAHTVWIGERTRQIDGAHIAFAQVIANPVGKLGPNMTPELAVEYVERLDP  
 HNKPGRLLTVSRMGNHKVRDLLPPIVEKVQATGHQVIWQCDDPMHGNTHESSTGFKTRHFDRIVDE  
 VQGFEEVHRALGTHPGGIHVEITGENVTECLGGAQDISETDLAGRYETACDPRNLNTQQSLELAFLL  
 VAEMLRD

>3RQOA

RAPAPATPHAPDHSPAPNSPTLTRPPEGPKFPRVKNWELGSITYDTLCAQSQQDGPCTPRRCLGS  
 LVLPRKLQTRPSPGPPPAEQLLSQARDFINQYYSSIKRSGSQAHEERLQEVEAEVASTGTYHLRE  
 SELVFGAKQAWRNAPRCVGRIQWGKLVQVDFARDCSSAQEMFTYICNHIKYATNRGNLRSAITVFP  
 QRAPGRGDFRIWNSQLVRYAGYRQQDGSVRGDPANVEITELCIQHGWTPGNGRFDVLPLLLQAPD  
 EAPELFVLPPELVLEVPLEHPTLEWFAALGLRWYALPAVSNMLEIGGLEFSAAPFSGWYMSTEI  
 GTRNLCDPHRYNILEDVAVCMDLDRTRTSSSLWKDKAAVEINLAVLHSFQLAKVTIVDHHAATVSF  
 MKHLDNEQKARGGCPADWAWIVPPISGSLTPVVFHQEMVNYILSPAFLRYQPDWP

>3RO9A

KVPVVGIVAALLPEMGIQFQGNLPWRLAKEMKYFREVTTLTNDNSKQNVVIMGRKTWESIPOKFR  
 PLPKRINVVSRSDGELRKVEDGIYHSNSLRNCLTALQSSLANENKIERIYIIGGGEIYRQSM  
 LADHWLITKIMPLPETTIPQMDTFLQKQELEQRFYDNSDKLVDFLPSIQLEGRLLTSQEWNGELV  
 KGLPVQEKGYQFYFTLYTKKLEHHHHHHHH

>3RMJA

GIDPFTMTQTRNVIIFDITLRDGEQSPGAAMTKEEKIRVARQLEKLGVDIIEAGFAAASPGDFEA  
 VNAIAKTITKSTVCSLSRAIERDIRQAGEAVAPAPKKRIHTFIATSPIHMEYKLMKPKQVIEAA  
 VKAVKIAREYTDDEVFSCEDALRSEIDFLAEICGAVIEAGATTINIPDTVGYSIPIYKTEEFFREL  
 IAKTPNGGKVVWSAHCHNDLGLAVANSLAALKGGARQVECTVNGLGERAGNASVEEIVMALKVRH  
 DLFGLTGDITQIVPSSKLVSTITGYPVQPNKAIVGANAFSHESGIHQDGVLVKHRETYEIMSAE  
 SVGWATNRLSLGKLSGRNAFKTKLADLGIIELESEEALNAAFARFK

>3AXXA

MEGNTILKIVLICTILAGLFGQVVPVYAENTTYQTPTGIYYEVRGDTIYMINVTSGEETPIHLFG  
 VNWFGFETPNHVHGLWKRNWEDMLLQIKSLGFNAIRLPFCETESVKPGTQPIGIDYSKNPDLRGL  
 DSLQIMEKIIKKAGDLGIFVLLDYHRIGCTHIEPLWYTEDFSEEDFINTWIEVAKRFKGYWNVIG  
 ADLKNEPHSVTSPPAAYTDGTGATWGMGNPATDWNLAERIGKAILKVAPHWLIFVEGTQFTNPK  
 TDSSYKWGYNAWWGNLMAVKDYPVNLPRNKLVSYPHYGPDVYNQPYFGPAKGFDPNLPDIWYH  
 HFGYVKLELGYSVVIIEFGGKYGHGGDPRDVIWQNKLVDMWMIENKFCDFYWSWNPDSGDTGGIL  
 QDDWTTIWEKYNLRLMDSKSSSSTQSVIRSTTPTKSNTSKKICGPAILIILAVFSLLLRR  
 APR

>3RKLA

MSKITINIKDNTIEYGHKEFVLSNLQEDIKNLAEIVYQLAKLIEKLSQYEEEEVDTELYNLLHEYA  
 IYLAGATSMFIDSENKHHHHHH

>3RIKA

ARPCIKPSFGYSSVVCNATYCDSDPPTFPALGTFSRYESTRSGRRMELSMGPIQANHTGTGL  
 LLTLQPEQKFQVKVGGGAMTDAAALNILALSPPAQNLLLKSYFSEEGIGYNIIRVPMASCDFSI  
 RTYTYADTPDDFQLHNFSLPEEDTKLKIPLIHRALQLAQRPVSLASPWTSPTWLKTNGAVNGKG  
 SLKGQPGDIYHQTWARYFVKFLDAYAEHKLQFWAVTAENEPSAGLLSGYPFQCLGFTPEHQRDFI  
 ARDLGPTLANSTHNVRLMLDDQRLLLPHWAKVVLTDPAAKYVHGIHAVHWYLDLAPAKATLG  
 ETHRLFNTMLFASEACVGSKFWEQSVRLGSWDRGMQYSHSIIITNLLYHVVGWTDWNLALNPEGG  
 PNWVRNFVDSPIIVDITKDTFYKQPMFYHLGHFSKFIPEGSQRVGLVASQKNDLDAVALMHPDGS

AVVVVLRSSKDVPLTIKDPVGFLETISPGYSIHTYLWHRQ

>3RFYA

GSPGISGGGGGILLVANPVIIPDVSVLISGPPIKDPEALLRYALPIDNKAIREVQKPLEDITDSLK  
IAGVKALDSVERNVRQASRTLQQGKSIIVAGFAESKKDHGNEMIEKLEAGMQDMLKIVEDRKRDA  
VAPKQKEILKYVGGIEEDMVDGFPYEVPEEYRNMPLLKGRASVDMKVKIKDNPNIEDCVFRIVLD  
GYNAPVTAGNFVDLVERHFYDGMETQRSDGFVVQTDGPEGPAEGFIDPSTEKTRTVPLEIMVTGE  
KTPFFYGSTLEELGLYKAQVVI PFNAFGTMAMAREEFENDSGSSQVFWLLKESELTPSNSNILDGR  
YAVFGYVTDNEDFLADLKVGDVIESIQVVSGLLENLANPSYKIAG

>2YFKA

METFKEYIEKLDKLEFEKMYENDFFLTWEKTRDELEAVFTVADTLRYLRENNISTKIFDSGLGIS  
LFRDNSTRTRFSFASACNLLGLEVQDLDEGKSQISHGETVRETANMISFMADIIGIRDDMYIGKG  
NAYMHEVSESVQEGYKDGVLQRPRTLVLNLQCDIDHPTQAMADALHLIHEFGGIENLKGKKVAMTW  
AYSPSYGKPLSVPQGIIVGLMTRLGMDVVLAHPEGYEIMPEVEEVAKKNAAEFGGNFTKTNMAEA  
FKDADVVPKSWAPFAAMEKRTELYGNQDQAGIDQLEQELLSQNKHKHDWECTEELMKTTKDGKA  
LYMHCLPADITGVSCEEGEVEASVFDYRVELYKEASYKPYVIAAMI FL SKVKNPQKTLTDLADK  
ATPREVKDPNSSSVDKLAAALEHHHHHH

>2LBTA

GQAPPGPASGPCADLQSAINA V TGGPIAFGNDGASLI PAAYEILNRVADKLKACPDARVTINGY  
TDNTGSEGINIPLSAQRAKIVADYLVARGVAGDHIATVGLGSVNPIASNATPEGRAKNRRVEIVV  
NHHHHHH

>3AXDA

MVSMKDFSGAELYTLEEYQYGF EARMKMAAASGTVSSMFLYQNGSEIADGRPWVEVDIEVLGKS  
PGSFQSNIIITGKAGAQKTSEKHHAVSPAADQAFHTYGLEWTPNYVRWTVDGQEVKTEGGQVSNL  
TGTQGLRFNLWSSESAAWVGQFDESKLPLFQFINWVKVYKYTPGQEGGSDFTLDWTDNFDTFDG  
SRWGKGDYTFDGNRVDLTDKNIYSRDGMLILALTRKGQESFNGQVPRDDEPAPL

>2YEBV

MQRSFAALGLWGLSLAQEAHRVAITHPGGSFNQEVAFLEFPWVYFFSFLIFLVVAGSLAYVTWKFR  
ARPEDQEEPPQIHGNDRLVWVTLIPLAIVFVLFGLTAKALIQVNRPIPGAMKVEVTGYQFWWDF  
HYPELGLRNSNELVLPAGVPVELEITSKDV IHSFWVPLAGKRDAIPGQTTTRISFEPKEPGLYYG  
FCAELCGASHARMLFRVVVLPKEEFDRFVEAAKASPAPVADERGQQVFQQNCAACHGVARSMPA  
VIGPELGLWGNRTSLGAGIVENTPENLKAWIRDPAGMKPGVKMPGFPQLSEEDLDALVRYLEGLK  
VEGFDFGALPKF

>2YEVA

MAITAKPKAGVWAVLWDLTTVDHKKIGLMYTATAFFAFALAGVFSLLIRTQLAVPNNQFLTGEQ  
YNQILTLHGATMLFFFI IQAGLTGFGNFVVPMLGARDVALPRVNAFSYWAFLGAIVLALMSYFF  
PGGAPSVGWTFYYPFSAQSESGVDFYLAAILLLGFSSLLGNANFVATIYNLRAQGMSLWKMPIYV  
WSVFAASVNLNLSLAGLTAATLLVLLERKIGLSWFNPAVGGDPVLFQQFFWFYSHPTVYVMLLPY  
LGILAEVASTFARKPLFGYRQMVWAQMGIVVLGTMVWAHMFVGESTLQIAFAFFTALIAVPT  
GVKLFNIIGTLWGGKLMKTPLYWVLGFI FNFLGGITGVMLSMTPLDYQFHDSYFVVAHFHNVL  
MAGSGFGAFAGLYYWWPKMTGRMYDERLGRHLFWLFLVGYLLTFLPQYALGYLGMPPRRYYTYNAD  
IAGWPELNLLSTIGAYI LGLGGLVWIYTMWKSLSRSGPKAPDNPWGGYTLEWLTASPPKAHNFVK  
LPTEFPSEKPLYDWKKKGVELKPEDPAHIHLPNSSFWPFYSAATLFAFFVAVAALPVPNVMMWVF  
LALFAYGLVRWALEDEYSHPVEHHTVTGKSNAWMMGMAWFIVSEVGLFALIAGLYLRLSGAATP  
PEERPALWLALLNTFLLVSSSFTVHFAHDLRRGRFNPFRRFGLLVTIILGVLFFLVQSWEFYQFY

HHSSWQENLWTAFFTIVGLHGLHVVIGGFGLILAYLQALRGKITLHNHGTLEAASMYWHLVDAV  
WLVIVTIFYVW

>3RBUA

RSGLNDIFEAQKIEWHEGSGSGSENLYFQGRSKSSNEATNITPKHNMKAFLDELKAENIKKFLYN  
FTQIPHLAGTEQNFQLAKQIQSQWKEFGLDSVELAHYDVLLSYPNKTHPNYISIIINEDGNEIFNT  
SLFEPPPPGYENVSDIVPPFSAFSPQGMPEGDLVYVNYARTEDFFKLERDMKINCSGKIVIARYG  
KVFRGNKVKNAQLAGAKGVILYSDPADYFAPGVKSYPDGWNLPGGGVQRGNIILNLGAGDPLTPG  
YPANEYAYRRGIAEAVGLPSIPVHPIGYYDAQKLLLEKMGGSAAPPDSSWRGSLKVPYNVGPFTGN  
FSTQKVKMHIHSTNEVTRIYNVIGTLRGAVEPDRYVILGGHRDSWVFGGIDPQSGAAVVHEIVRS  
FGTLKKEGWRPRRTILFASWDAEEFGLLGSTEWAEENSRLQERGVAYINADSSIEGNYTLRVDC  
TPLMYSLVHNLTKEKSPDEGFEGKSLYESWTKKSPSEFSGMPRISKLGSGNDFEVFFQRLGIA  
SGRARYTKNWETNKFSGYPLYHSVYETYELVEKFYDPMFKYHLTVAQVRGGMVFELANSIVLPFD  
CRDYAVVLRKYADKIYSISMKHPQEMKTYSVSFDSLFSAVKNFTEIASKFSERLQDFDKSNPIVL  
RMMNDQLMFLERAFIDPLGLPDRPFYRHVIYAPSSHKNKYAGESFPGIYDALFDIESKVDPSKAWG  
EVKRQIYVAAFTVQAAAETLSEVA

>2YDQA

GSVGPKTGEENQVLVPLNPTPENLEVVDGDFKITSSINLVGEEEEADENAVNALREFLTANNIEI  
NSENDPNSTTLIIGEVDDDIPELDEALNGTTAENLKEEGYALVSNKGKIAIEGKDGDGTFYGVQT  
FKQLVKESNIPEVNITDYPTVSARGIVEGFYGTPTHQDRLDQIKFYGENKLNTYIYAPKDDPYH  
REKWRPEPYPESEMQRMQELINASAENKVDFVFGISPGIDIRFDGDAGEEDFNHLITKAESLYDMG  
VRSFAIYWDNIQDKSAAKHAQVLNRFNEEFVKAKGDVKPLITVPTEYDTGAMVSNQPRAYTRIF  
AETVDPSIEVMWTGPGVVTNEIPLSDAQLISGIYDRNMAVWWNYPVTDYFKGKLALGPMHGLDKG  
LNQYVDFFTVNPMEHAELSKISIHATAADYSWNMDNYDYDKAWNRAIDMLYGDLAEDMKVFANHST  
RMDNKTWAKSGREDAPELRAKMDLWNLKSSKEDASALIEELYGEFARMEEACNNLKANLPEVAL  
EECSRQLDELITLAQGDKASLDMIVAQLNEDTEAYESAKEIAQNKLNTALSSFAVISEKVAQSF  
I  
QEALS

>3R6TA

MGDTKEQRILRYVQQNAKPGDPQSVLEAIDTYCTQKEWAMNVGDAKGQIMDAVIREYSPSLVLEL  
GAYCGYSAVRMARLLQPGARLLTMEINPDCAAITQOQLNFAGLQDKVTILNGASQDLIPQLKKKY  
DVDTLDMVFLDHWKDRYLPDTLLLEKCGLLRKGTVLLADNVIVPGTPDFLAYVRGSSSEFECTHYS  
SYLEYMKVVDGLEKAIYQGPSSPDKS

>3R3JA

LHNYGYTSTKSVDNQIEELREKVVSKNKNEPEFLQAFEEVLSCLKPVFKKDNVYIGVLENIAEPE  
RVIQFRVPWINDKGEHKMNRGFRVQYNSVLGPYKGLRFHFAVNLVSVIKFLGFQIFKNSLTTL  
MGGGKGGSDFDPKGKSENEILKFCQSFMTNLFYRIGPNTDVPAGDIGVGGREIGYLFQYKLLKN  
SFEGVLTGKNIKWGGSNIRAEATGYGVVYFAENVLKDLDNDNLENKKCLVSGSGNVAQYLVKELIE  
KGAIVLTMSDSNGYILEPNGFTKEQLNYIMDIKNNQRLRLKEYLYKYSKTAKYFENQKPWNI  
PCDI  
AFPCATQNEINENDADLFIQNKCKMIVEGANMPTHIKALHKLKQNNIILCPSKAANAGGVAVSGL  
EMSQNSMRLQWTHQETDMKLQNIKMSIYEQCHNTSKIYLNESDLVAGANIAGFLKVADSFLEQGG  
L

>3R18A

APSYPEYTREEVGRHRSPEERVVWTHGTDVDFDVTDFVELHPGGPDKILLAAGGALEPFWALYAVH  
GEPHVLELLQYKVGELSPDEAPAAPDAQDPFAGDPPRHPGLRVNSQKPFNAEPPAELLAERFLT  
PNELFFTRNHLVPAVEPSSYRLRVDGPGGGTSLSLAELRSRFPKHEVTATLQACAGNRRSEMSR

VRPVKGLPWDIGAI STARWGGARLRDVLLHAGFPEELQGEWHVCFEGLDADPGGAPYGASIPYGR  
 ALSPAADVLLAYEMNGTELPRDHGFPVRVVVPGVVGARSVKWLRRVAVSPDESPSHWQQNDNKG  
 SPCVDWDTVDYRTAPAIQELPVQSAVTQPRPGAAPPPELTVKGYAWSGGGREVVVRVDVSLDGG  
 TWKVARLMGDKAPPGRRAWALWELTVPVEAGTELEIVCKAVDSSYNVQPDSVAPIWNLMGVLST  
 AWHRVRVSVQD

>3QVSA

MKVVLVGAYGIVSTTAMVGARAIERGIAPKIGLVSELPHFEGIEKYAPFSFEFGGHEIRLLSNAY  
 EAAKEHWELNRHFDREILEAVKSDLEGIVARKGTALNCGSGIKELGDIKTLEGEGLSLAEMVSRI  
 EEDIKSFADDETVVINVASTEPLPNYSEEYHGSLEGFERMIDEDRKEYASASMLYAYAALKLGLP  
 YANFTPSPGSAIPALKELAEKKGVPHAGNDGKTGETLVKTTLAPMFAYRNMEVVGWMSYNILGDY  
 DGKVL SARDNKESKVL SKDKVLEKMLGSPYSITEIQYFPSLVDNKTA FDFVHFKGFLGKLMKFY  
 FIWDAIDAIVAAPLILDIARFLLFAKKGKGVKGVKEMAFFFKSPMDTNVIN THEQFVVLKEWYSN  
 LK

>3QSYA

MAWPKVQPEVNIGVVGHVDHGKTTLVQAITGIWTSKHSEELKRGMTIKLGYAETNIGVCECKKP  
 EAYVTEPSCSCGSDDEPKFLRRISFIDAPGHEVL MATMLSGAALMDGAILVVAANEFPFPQTR  
 EHFVALGIIGVKNLIIVQNKVDVVSKEEALSQYRQIKQFTKGTWAENVPIIPVSALHKINIDSLI  
 EGIEEYIKTPYRDL SQKPVMLVIRSFVFNKPGTQFNEKGGVIGGSIIQGLFKVDQEIKVLPGLR  
 VEKQGVSYEPIFTKISSIRFGDEEFKEAKPGGLVAIGTYLDPSTKADNLLGSIITLADAEVPV  
 LWNIRIKYNLLERVVGAKEMLKVDPIRAKETLMLS SVGSSTTLGIVTSVKKDEIEVELRRPVAVWS  
 NNIRTVISRQIAGRWRMIGWGLVEI

>3AUKA

MAASRANDAPIVLLHGFTGWGREEMFGFKYWGGVVRGDI EQWLNDNGYRTYTLAVGPLSSNWDRAC  
 EAYAQLVGGTVDYGAHAHA KHGHARFGRTYLGLPELKRGGRIHIIAHSQGGQTARMLVSLLENG  
 SQEEREYAKAHNVLSPLFEGGHHFVLSVTTIATPHDGTTLVNMVDFTDRFFDLQKAVLEAAVA  
 SNVPYTSQVYDFKLDQWGLRRQPGESFDHYFERLKRSPVWTSTDTARYDLSVSGAEKLNQWVQAS  
 PNTYYLSFATERTYRGALTGNYYPELGMNFA SAVVCAPFLGSYRNPTLGI DDRWLENDGIVNTVS  
 MNGPKRGSSDRIVPYDGALKKGVWNDMGTYNVHDLEIIGVDPNPSFDIRAFYLR LAEQLASLQP

>3QMXA

MRGSHHHHHGSAVSAKIEIYTWSTCPFCMRALALLKRKGVVEFQEYCIDGDNEAREAMAARANGK  
 RSLPQIFIDDQHIGGCDDIYALDGAGKLDPLLHS

>3QLIA

HHHHHSSGLVPRGSMDIRALYDEKLTTP EEAVSSIASGSHLSMGMFAAEPPALLKALADRATR  
 DIGDLRVYYFETAKIAGDTILRYELNNRIKPYSMFVTAVERALIRRGIEDGGRKVVNYVPSNFHQ  
 APRLLAEEIGIDTFMHTVSPMDCHGYFSLGVNDYSSRIARSARRFIVEVNRYM PRVQGEAAAIH  
 ISEVDAIVENHVPLIEMPVRS AIP EYTSISHIIADLVPDGACLQMGV GALPNLVCGVLKDRNDLG  
 IHTEVLNPGVLVDLIRRGVV TNQRKTLDRGRSVFTFAMGQQEMYEYLN DHPAIFSRPVDYVNDPHI  
 IAQNDNVVSINATLQIDL TGACNSEHMLGHQYSASGGQLDFVRGAYASKGGRSIIATPSTAAKGT  
 VSRIIPRIDGPVTTPRIDTHYIVTEFGAVNLKGLSSTERALRIIELAHPDFRDEL TQA AKMHLI

>2L97A

MEGLGFAIPANDAINIIEQLEKNGKVTRPALGIQMVNLSNVSTSDIRRLNIPSNVTSGVIVRSVQ  
 SNMPANGHLEKYDVITKVDDKEIASSTDLQSALYNHSIGDTIKITYRNGKEETTSIKLNKLEHH  
 HHHH

>3QKGA

GPVPTPPDNIQVQENFNISRIYGKWNLAIGSTSPWLKKIMDRMTVSTLVLGEGATEAEISMTST  
RWRKGVCEETSGAYEKTDGKFLYHKSKNITMESYVVHTNYDEYAIFLTKKFSRHHGPTITAK  
LYGRAPQLRETLQDFRVVAQGVGIPEDSIFTMADRGECPGEQEPEPILIPRSAWSHPQFEK

>3QJJA

HHHHMRIEVKLLPLKDNPILPFNYNIEVYSQILEKVNSEIPTIAKLLSSPHGFWTFISRIIVRKRK  
ILPDKGIEILSDDVSLYISSNEDIIRAI AEA VEKSPEFKIGELSFLVGDIIKAIKVKELGKENVF  
STLSPIVVRTVKFEGNKL RHWDLYPHDEL FMDRLRKMILRYSEVMGETPKDRDFTIEVLKFKPT  
RLMVGSSYIRGSLMVFRYAGSEEIARFGYENGFGEKTGLGFGMVKLIE

>2Y6YA

GAMTIGRAKVYATLSKIFYHLFYDEAI PKDCREIIEKFGEIDFNLRSVLVREL RGSVLIKDMPQS  
LAEVYESVMKDFYERYGFQASELHADHIAVELAFMSKLVEREISLAQQMKEEELYKIRAAQHRFI  
KAHLQPLVKNLPSAPLLNFVRDFVREDAKYLYSSLVGEKNEGADNN

>2L8LA

CLAEGTRIFDPVTGTTTHRIEDVVDGRKPIHVVA AAKDGT LHARPVVS WFDQGTRDVI GLRIAGGA  
ILWATPDHKVLT EYGWRAAGELRKGDRVAVRDVETGELRYSVIREVLPTRRARTFDLEVEELHTL  
VAEGVVVHN

>3QDDA

HMPEETQTQDQPMEEEEVETFAFQAEIAQLMSLIINTFYSNKEIFLRELISNSSDALDKIRYESL  
TDPSKLD SGKELHINLI PNKQDRTLTIVDTGIGMTKADL INNLGTIAKSGTKAFMEALQAGADIS  
MIGQFGVGFYSAYLVAEKVTVITKHNDDEQYAWESSAGGSFTVRTDTGEPMGRGTKVILHLKEDQ  
TEYLEERRIKEIVKKHSQFIGYPITL FVEKERDKEVSDDEAE

>3QBDA

HHHHHMTDIGAPVTVQVAVDPPYPVVIGTGLLDELEDLLADRHKVAVVHQPLAETAEEIRKRL  
AGKGVDAHRIEIPDAEAGKDLPVVGF IWEVLGRIGIGRKDALVSLGGGAATDVAGFAAATWLRGV  
SIVHLPTTLLGMVDAAVGGKTGIN TDAGKNLVGAFHQPLAVLVDLATLQTLPRDEMICGMAEVVK  
AGFIADPVI LD LIEADPQAALDPAGDVLPELIRRAITVKAEVVA ADEKESELREILNYGHTLGHA  
IERRERYRWRHGA AVSVGLVFAAELARLAGRLDDATAQRHRTILSSLGLPVSYDPDALPQLLEIM  
AGDKKTRAGVLRVVDGLAKPGRMVGPDPGLLV TAYAGVCAP

>3QB4A

MKRQGKRPSKNL KARC SRKALHVNFKDMGDDWIIAPLEYEAFHCEGLCEFP LASHLEPTNHA VI  
QTLMN SMDPESTPPTCCVPTRLSPISILFIDSANNVVKQYEDMVVESCGR

>2L8BA

TSGIHVLDEL SVRALSRDIMQNRVTVHPEKSVPRTAGYS DAVSVLAQDRPSLAIVSGQGAAGQ  
RERVAELVMMAREQGREVQIIAADRRSQMNMQDERLSGELITGRRQLLEGMAFTPGSTVIVDQG  
EKLSLKETLTL LDGAARHNVQVLI TD SGQRTGTGSALMAMKDAGVNTYRWQGGEQRPAT
